# Supplementary material for: Immune-Related lncRNAs with WGCNA Identified the Function of SNHG10 in HBV-Related Hepatocellular Carcinoma
Source: Hindawi journal article supplement (doi:10.1155/2022/9332844), 2022-07-06
Supplement: f1 [file 9332844.f1.zip]

Supplementary table 4:Pathway analysis mapped the  
Category

The co-expression red module

3 identified in the red co-expression module.

| Term                                         | P-Value     |
|----------------------------------------------|-------------|
| Cytokine-cytokine receptor interaction       | 2.8E-32     |
| Intestinal immune network for IgA production | 1.6E-15     |
| Chemokine signaling pathway                  | 3.5E-14     |
| T cell receptor signaling pathway            | 1.3E-12     |
| NF-kappa B signaling pathway                 | 1.6E-11     |
| Jak-STAT signaling pathway                   | 0.000000016 |
| Staphylococcus aureus infection              | 0.000003    |
| Toll-like receptor signaling pathway         | 0.0000051   |
| TNF signaling pathway                        | 0.0000097   |
| NOD-like receptor signaling pathway          | 0.000049    |
| B cell receptor signaling pathway            | 0.000081    |
| RIG-I-like receptor signaling pathway        | 0.0004      |

**Adjust P value**

3.60E-30  
1E-13  
1.5E-12  
4.1E-11  
4E-10  
0.00000023  
0.000024  
0.000038  
0.000066  
0.00032  
0.00045  
0.0022
