# Supplementary material for: Immune-Related lncRNAs with WGCNA Identified the Function of SNHG10 in HBV-Related Hepatocellular Carcinoma
Source: Hindawi journal article supplement (doi:10.1155/2022/9332844), 2022-07-06
Supplement: f1 [file 9332844.f1.zip]

**Supplementary table 5: The coexpression analysis between immune related g**

| Immune gene | lncRNA       | cor        | pvalue   | Regulation |
|-------------|--------------|------------|----------|------------|
| RPS19       | AC112491.1   | 0.7006259  | 6.27E-17 | postive    |
| TRAF6       | SEMA6A-AS11  | 0.70109778 | 5.86E-17 | postive    |
| DEFB1       | LINC01671    | 0.70265854 | 4.67E-17 | postive    |
| CMKLR1      | AC138207.5   | 0.70429267 | 3.68E-17 | postive    |
| TARBP2      | LINC01503    | 0.70453312 | 3.55E-17 | postive    |
| IL18BP      | HLA-DQB1-AS1 | 0.70473781 | 3.45E-17 | postive    |
| WAS         | HLA-DQB1-AS1 | 0.70506308 | 3.28E-17 | postive    |
| CCL25       | AL135924.2   | 0.70591832 | 2.90E-17 | postive    |
| TCF7        | AC008549.1   | 0.70616854 | 2.79E-17 | postive    |
| FCGR3B      | LINC01139    | 0.70780585 | 2.19E-17 | postive    |
| APOBEC3G    | LINC01871    | 0.70835492 | 2.02E-17 | postive    |
| CTLA4       | HLA-DQB1-AS1 | 0.70906097 | 1.81E-17 | postive    |
| IL16        | HLA-DQB1-AS1 | 0.70933307 | 1.74E-17 | postive    |
| TCF12       | MIR31HG      | 0.70935016 | 1.74E-17 | postive    |
| ARHGDI B    | HLA-DQB1-AS1 | 0.71013913 | 1.54E-17 | postive    |
| IL18        | AC138207.5   | 0.71063536 | 1.43E-17 | postive    |
| CD24        | SNHG12       | 0.71131999 | 1.29E-17 | postive    |
| LCP2        | HLA-DQB1-AS1 | 0.71145153 | 1.27E-17 | postive    |
| CKLF        | AC016405.3   | 0.71152075 | 1.25E-17 | postive    |
| CCL4        | LINC01871    | 0.71273066 | 1.04E-17 | postive    |
| AQP9        | LINC01278    | 0.71314786 | 9.79E-18 | postive    |
| CTLA4       | AC004687.1   | 0.71387499 | 8.76E-18 | postive    |
| APOA4       | AL138826.1   | 0.71409093 | 8.48E-18 | postive    |
| IL2RG       | PCED1B-AS1   | 0.71448563 | 7.98E-18 | postive    |
| RPS19       | PRR34-AS1    | 0.71663945 | 5.73E-18 | postive    |
| LST1        | AC138207.5   | 0.71736759 | 5.12E-18 | postive    |
| HCLS1       | HLA-DQB1-AS1 | 0.71747628 | 5.03E-18 | postive    |
| KMT2A       | MIR31HG      | 0.71790355 | 4.71E-18 | postive    |
| RPS19       | AP000240.1   | 0.71792556 | 4.70E-18 | postive    |
| CD3E        | LINC01871    | 0.71802513 | 4.62E-18 | postive    |
| CD79B       | AC110741.1   | 0.71925852 | 3.81E-18 | postive    |
| SIRPG       | LINC01871    | 0.71990175 | 3.45E-18 | postive    |
| LST1        | HLA-DQB1-AS1 | 0.7208027  | 2.99E-18 | postive    |
| CKLF        | AL138724.1   | 0.72399884 | 1.80E-18 | postive    |
| CKLF        | AC006205.2   | 0.72480286 | 1.59E-18 | postive    |
| PTAFR       | PCED1B-AS1   | 0.72484369 | 1.58E-18 | postive    |
| KMT2A       | ANKRD10-IT1  | 0.72502476 | 1.53E-18 | postive    |
| CKLF        | LINC02027    | 0.72521643 | 1.48E-18 | postive    |
| CCL25       | AC147651.3   | 0.725814   | 1.35E-18 | postive    |
| FCN1        | HLA-DQB1-AS1 | 0.72652797 | 1.20E-18 | postive    |
| CCR5        | HLA-DQB1-AS1 | 0.72661743 | 1.19E-18 | postive    |
| MAFB        | AC254562.3   | 0.72763681 | 1.00E-18 | postive    |
| NCOA6       | AC005288.1   | 0.72912382 | 7.89E-19 | postive    |
| IFI16       | AC110741.1   | 0.72927629 | 7.70E-19 | postive    |
| SPI1        | PCED1B-AS1   | 0.73003151 | 6.80E-19 | postive    |
| RPS19       | AL355353.1   | 0.73366021 | 3.73E-19 | postive    |
| CD24        | AC026740.1   | 0.73480961 | 3.08E-19 | postive    |
| CIITA       | MMP25-AS1    | 0.73515678 | 2.91E-19 | postive    |
| CTSW        | HLA-DQB1-AS1 | 0.73521726 | 2.88E-19 | postive    |

|          |              |            |          |         |
|----------|--------------|------------|----------|---------|
| IGSF6    | LINC01871    | 0.73606589 | 2.50E-19 | postive |
| ARHGDIB  | AC004687.1   | 0.73710865 | 2.09E-19 | postive |
| FCGR3B   | AC243836.1   | 0.74214105 | 8.85E-20 | postive |
| LY86     | AC138207.5   | 0.74337789 | 7.14E-20 | postive |
| CKLF     | AL121832.2   | 0.74410063 | 6.29E-20 | postive |
| APOBEC3G | PCED1B-AS1   | 0.74507736 | 5.30E-20 | postive |
| CCR5     | AC004687.1   | 0.74592786 | 4.57E-20 | postive |
| CKLF     | AC008035.1   | 0.74614941 | 4.39E-20 | postive |
| EBI3     | PCED1B-AS1   | 0.74655572 | 4.09E-20 | postive |
| LCK      | LINC01871    | 0.74755392 | 3.43E-20 | postive |
| LTF      | AC025575.2   | 0.74977628 | 2.30E-20 | postive |
| HCLS1    | AC004687.1   | 0.75078554 | 1.92E-20 | postive |
| CD79B    | AC105118.1   | 0.75448972 | 9.80E-21 | postive |
| CCL26    | C1QTNF1-AS1  | 0.75450314 | 9.77E-21 | postive |
| CD2      | LINC01871    | 0.75559716 | 7.99E-21 | postive |
| GTPBP1   | Z97056.1     | 0.75658987 | 6.65E-21 | postive |
| LCP2     | PCED1B-AS1   | 0.75677638 | 6.43E-21 | postive |
| LY86     | LINC01871    | 0.75770604 | 5.41E-21 | postive |
| SPI1     | AC138207.5   | 0.75863423 | 4.55E-21 | postive |
| CD79A    | AC004687.1   | 0.76101606 | 2.90E-21 | postive |
| CKLF     | LINC00239    | 0.76202945 | 2.40E-21 | postive |
| CD79B    | Z98257.1     | 0.76210199 | 2.36E-21 | postive |
| CD79A    | PCED1B-AS1   | 0.76250875 | 2.19E-21 | postive |
| HELLS    | AC099850.3   | 0.76303916 | 1.98E-21 | postive |
| MAFB     | MALAT1       | 0.76336066 | 1.86E-21 | postive |
| CXCL13   | AC098487.1   | 0.76360975 | 1.77E-21 | postive |
| NCF4     | PCED1B-AS1   | 0.76362991 | 1.76E-21 | postive |
| CKLF     | AC109322.1   | 0.76396385 | 1.65E-21 | postive |
| SLA2     | AC004687.1   | 0.76457393 | 1.47E-21 | postive |
| CMKLR1   | PCED1B-AS1   | 0.76537505 | 1.26E-21 | postive |
| LST1     | LINC1278     | 0.76689361 | 9.39E-22 | postive |
| SIRPG    | HLA-DQB1-AS1 | 0.76720518 | 8.83E-22 | postive |
| IGSF6    | PCED1B-AS1   | 0.76839908 | 6.99E-22 | postive |
| APOA4    | AGAP1-IT1    | 0.76972495 | 5.39E-22 | postive |
| CXCL13   | AC243836.1   | 0.77063308 | 4.50E-22 | postive |
| EBI3     | AC138207.5   | 0.77072064 | 4.42E-22 | postive |
| CST7     | LINC01871    | 0.77118874 | 4.03E-22 | postive |
| LILRB2   | PCED1B-AS1   | 0.7715763  | 3.73E-22 | postive |
| MAP4K1   | HLA-DQB1-AS1 | 0.77377245 | 2.40E-22 | postive |
| CD96     | PCED1B-AS1   | 0.77386367 | 2.36E-22 | postive |
| NFAM1    | PCED1B-AS1   | 0.77431371 | 2.15E-22 | postive |
| FCGR3B   | AC098487.1   | 0.77441232 | 2.11E-22 | postive |
| SIRPG    | AC004687.1   | 0.77609915 | 1.50E-22 | postive |
| CCL4     | PCED1B-AS1   | 0.77784111 | 1.05E-22 | postive |
| MAFB     | LINC00460    | 0.7778886  | 1.04E-22 | postive |
| CCL5     | HLA-DQB1-AS1 | 0.77859027 | 8.97E-23 | postive |
| IL16     | AC004687.1   | 0.77893567 | 8.35E-23 | postive |
| CKLF     | SNHG6        | 0.77960196 | 7.27E-23 | postive |
| GZMA     | HLA-DQB1-AS1 | 0.78070673 | 5.77E-23 | postive |
| SIT1     | HLA-DQB1-AS1 | 0.78127085 | 5.13E-23 | postive |
| CD2      | HLA-DQB1-AS1 | 0.78228883 | 4.14E-23 | postive |

|        |              |            |          |         |
|--------|--------------|------------|----------|---------|
| CTSW   | AC004687.1   | 0.78286874 | 3.66E-23 | postive |
| CD3E   | HLA-DQB1-AS1 | 0.78302047 | 3.55E-23 | postive |
| ITGB2  | PCED1B-AS1   | 0.7889609  | 9.89E-24 | postive |
| CST7   | HLA-DQB1-AS1 | 0.79073384 | 6.70E-24 | postive |
| WAS    | AC004687.1   | 0.7907945  | 6.61E-24 | postive |
| SP2    | LBX2-AS1     | 0.79132237 | 5.88E-24 | postive |
| CKLF   | SNHG19       | 0.79629816 | 1.92E-24 | postive |
| IFI16  | AC105118.1   | 0.79761676 | 1.42E-24 | postive |
| FCGR3B | AC026202.2   | 0.79936032 | 9.53E-25 | postive |
| AQP9   | LINC01124    | 0.80037366 | 7.53E-25 | postive |
| LTF    | AC110741.1   | 0.80110306 | 6.35E-25 | postive |
| ZAP70  | HLA-DQB1-AS1 | 0.8018119  | 5.38E-25 | postive |
| SLA2   | HLA-DQB1-AS1 | 0.80452722 | 2.83E-25 | postive |
| LY86   | PCED1B-AS1   | 0.80515099 | 2.44E-25 | postive |
| LILRB2 | HLA-DQB1-AS1 | 0.80541205 | 2.29E-25 | postive |
| CKLF   | AL391056.1   | 0.80671643 | 1.67E-25 | postive |
| IL18BP | DLGAP1-AS5   | 0.810482   | 6.68E-26 | postive |
| LCK    | HLA-DQB1-AS1 | 0.81074659 | 6.26E-26 | postive |
| CCL4   | HLA-DQB1-AS1 | 0.81240911 | 4.14E-26 | postive |
| IL16   | PCED1B-AS1   | 0.81559422 | 1.85E-26 | postive |
| CTSW   | LINC01871    | 0.81627291 | 1.56E-26 | postive |
| CTLA4  | PCED1B-AS1   | 0.82091487 | 4.68E-27 | postive |
| GZMA   | AC004687.1   | 0.82266221 | 2.95E-27 | postive |
| CST7   | AC004687.1   | 0.82278247 | 2.86E-27 | postive |
| CCL5   | AC004687.1   | 0.82474259 | 1.69E-27 | postive |
| CD86   | PCED1B-AS1   | 0.82723175 | 8.60E-28 | postive |
| CIITA  | DLGAP1-AS5   | 0.82834446 | 6.33E-28 | postive |
| CCR5   | PCED1B-AS1   | 0.82836756 | 6.29E-28 | postive |
| CXCL13 | AC026202.2   | 0.83040803 | 3.57E-28 | postive |
| NCF4   | AC138207.5   | 0.83681053 | 5.75E-29 | postive |
| CCL25  | AF124730.1   | 0.83774502 | 4.37E-29 | postive |
| CD79B  | LINC01503    | 0.8392096  | 2.84E-29 | postive |
| LCK    | LBX2-AS1     | 0.84348543 | 7.85E-30 | postive |
| MAP4K1 | CTP1-AS2     | 0.84466135 | 5.47E-30 | postive |
| ZAP70  | AC004687.1   | 0.84496744 | 4.98E-30 | postive |
| CTSE   | AL133520.1   | 0.84523503 | 4.59E-30 | postive |
| SIRPG  | PCED1B-AS1   | 0.84712091 | 2.55E-30 | postive |
| FCN1   | AC004687.1   | 0.85021297 | 9.58E-31 | postive |
| FCN1   | PCED1B-AS1   | 0.85042332 | 8.96E-31 | postive |
| GTPBP1 | AL021707.8   | 0.85173896 | 5.86E-31 | postive |
| CXCL13 | SLC6A1-AS1   | 0.85209701 | 5.22E-31 | postive |
| LTF    | AC105118.1   | 0.8523484  | 4.81E-31 | postive |
| IFI16  | Z98257.1     | 0.85240435 | 4.72E-31 | postive |
| SLA2   | PCED1B-AS1   | 0.85334385 | 3.48E-31 | postive |
| CD3D   | AC004687.1   | 0.8535737  | 3.22E-31 | postive |
| CCL5   | LINC01871    | 0.8539147  | 2.88E-31 | postive |
| ZAP70  | PCED1B-AS1   | 0.85563874 | 1.63E-31 | postive |
| IFI16  | LINC01503    | 0.8611172  | 2.52E-32 | postive |
| CD3D   | LINC01871    | 0.86224772 | 1.70E-32 | postive |
| HCLS1  | PCED1B-AS1   | 0.86662123 | 3.57E-33 | postive |
| CCL25  | MAFA-AS1     | 0.86738152 | 2.71E-33 | postive |

|         |             |            |           |          |
|---------|-------------|------------|-----------|----------|
| ARHGDIB | PCED1B-AS1  | 0.86798891 | 2.17E-33  | positive |
| SIT1    | AC004687.1  | 0.87217197 | 4.54E-34  | positive |
| CD3E    | AC004687.1  | 0.87272259 | 3.68E-34  | positive |
| WAS     | PCED1B-AS1  | 0.87626854 | 9.31E-35  | positive |
| CST7    | PCED1B-AS1  | 0.87852584 | 3.79E-35  | positive |
| LST1    | LINC01871   | 0.88235947 | 7.93E-36  | positive |
| FCGR3B  | SLC6A1-AS1  | 0.88481806 | 2.82E-36  | positive |
| MAP4K1  | PCED1B-AS1  | 0.88503841 | 2.57E-36  | positive |
| LTF     | Z98257.1    | 0.88651902 | 1.36E-36  | positive |
| CD2     | AC004687.1  | 0.88797341 | 7.23E-37  | positive |
| CTSW    | PCED1B-AS1  | 0.88880593 | 5.02E-37  | positive |
| GZMA    | LINC01871   | 0.89009662 | 2.83E-37  | positive |
| FCGR3B  | AC015689.1  | 0.89706604 | 1.13E-38  | positive |
| LST1    | PCED1B-AS1  | 0.89988397 | 2.87E-39  | positive |
| SIT1    | PCED1B-AS1  | 0.90674876 | 8.54E-41  | positive |
| CCL5    | PCED1B-AS1  | 0.90861667 | 3.13E-41  | positive |
| CXCL13  | AC015689.1  | 0.90872687 | 2.95E-41  | positive |
| GZMA    | PCED1B-AS1  | 0.91518558 | 7.68E-43  | positive |
| S1PR4   | AC004687.1  | 0.91830979 | 1.18E-43  | positive |
| LCK     | PCED1B-AS1  | 0.92064912 | 2.78E-44  | positive |
| S1PR4   | PCED1B-AS1  | 0.92184852 | 1.30E-44  | positive |
| CD3E    | PCED1B-AS1  | 0.92287231 | 6.71E-45  | positive |
| LTF     | LINC01503   | 0.92684997 | 4.74E-46  | positive |
| CD2     | PCED1B-AS1  | 0.94058423 | 1.36E-50  | positive |
| CD3D    | PCED1B-AS1  | 0.94393216 | 7.27E-52  | positive |
| CXCL13  | PITPNM2-AS1 | 0.97991216 | 1.20E-74  | positive |
| FCGR3B  | PITPNM2-AS1 | 0.99706193 | 7.13E-118 | positive |

enes in the red co-expression module and lncRNAs.
