# Supplementary material for: Immune-Related lncRNAs with WGCNA Identified the Function of SNHG10 in HBV-Related Hepatocellular Carcinoma
Source: Hindawi journal article supplement (doi:10.1155/2022/9332844), 2022-07-06
Supplement: f1 [file 9332844.f1.zip]

**Supplementary table 6: 33 immune-related lncRNAs were**

| <b>LncRNA</b> | <b>p value</b> |
|---------------|----------------|
| A1BG-AS1      | 0.012          |
| AC006942.1    | 0.031          |
| CTBP-AS2      | 0.022          |
| SNHG10        | 0.003          |
| AC012146.1    | 0.021          |
| HAND2-AS1     | 0.004          |
| AC016044.1    | 0.024          |
| AC021074.3    | 0.023          |
| AC025171.1    | 0.018          |
| LINC00514     | 0.018          |
| MALAT1        | 0.002          |
| AC083809.1    | 0.019          |
| LINC00205     | 0.014          |
| AC090152.1    | 0.008          |
| LBX2-AS1      | 0.016          |
| LINC00460     | 0.012          |
| AC100847.1    | 0.028          |
| AC105942.1    | 0.014          |
| LINC00844     | 0.026          |
| ADORA2A-AS1   | 0.02           |
| AL031316.1    | 0.025          |
| MIR31HG       | 0.024          |
| AL133243.2    | 0.025          |
| AL157373.2    | 0.008          |
| SEMA6A-AS1    | 0.01           |
| AL355574.1    | 0.014          |
| AL360181.1    | 0.026          |
| AL603839.3    | 0.02           |
| AP003119.1    | 0.025          |
| LINC1278      | 0.024          |
| AP003469.2    | 0.025          |
| C5orf56       | 0.008          |
| CARD8-AS1     | 0.01           |

↗ significant related with the overall survival.

**Hazard ratio**

0.123(0.024-0.634)  
2.730(1.098-6.787)  
2.449(1.136-5.277)  
1.671(1.188-2.352)  
1.992(1.108-3.579)  
0.379(0.194-0.739)  
0.453(0.227-0.903)  
0.700(0.515-0.951)  
2.554(1.174-5.556)  
3.651(1.247-10.689)  
4.252(1.674-10.801)  
1.318(1.047-1.658)  
2.301(1.186-4.462)  
1.770(1.162-2.697)  
3.828(1.278-11.468)  
5.177(1.434-18.686)  
2.678(1.110-6.460)  
1.714(1.116-2.631)  
0.271(0.086-0.853)  
0.561(0.345-0.912)  
1.394(1.042-1.864)  
0.178(0.039-0.799)  
4.320(1.206-15.471)  
1.699(1.148-2.516)  
2.586(1.253-5.337)  
2.713(1.221-6.024)  
0.549(0.326-0.926)  
2.306(1.218-4.365)  
1.964(1.169-3.299)  
4.729(1.643-13.612)  
1.837(1.095-3.082)  
10.394(2.888-37.408)  
3.158(1.153-8.646)
