# Supplementary material for: Immune-Related lncRNAs with WGCNA Identified the Function of SNHG10 in HBV-Related Hepatocellular Carcinoma
Source: Hindawi journal article supplement (doi:10.1155/2022/9332844), 2022-07-06
Supplement: f1 [file 9332844.f1.zip]

Supplementary table 8: Quantification of the abundance of immune cell infiltration in tum

| Mixture  | B cells naiv | B cells mer | Plasma cell | T cells CD8 | T cells CD4 | T cells CD4 | T cells CD4 |
|----------|--------------|-------------|-------------|-------------|-------------|-------------|-------------|
| TCGA-2Y- | 0.017988     | 0           | 0.026629    | 0.404684    | 0           | 0.06642     | 0           |
| TCGA-2Y- | 0            | 0           | 0.086434    | 0.417925    | 0           | 0           | 0.113982    |
| TCGA-2Y- | 0            | 0           | 0           | 0.093987    | 0           | 0.186246    | 0           |
| TCGA-5C- | 0.010982     | 0           | 0.176649    | 0.12599     | 0           | 0.06221     | 0.013186    |
| TCGA-BC- | 0.027112     | 0           | 0.002743    | 0.038002    | 0           | 0.094087    | 0           |
| TCGA-BW- | 0.066693     | 0           | 0.001766    | 0.148797    | 0           | 0.097982    | 0           |
| TCGA-CC- | 0.02605      | 0           | 0.083784    | 0.122792    | 0           | 0.159274    | 0           |
| TCGA-DD- | 0.007324     | 0           | 0.020852    | 0.064518    | 0.001918    | 0.034791    | 0           |
| TCGA-DD- | 0.035997     | 0           | 0.010457    | 0.073018    | 0           | 0.254852    | 0           |
| TCGA-DD- | 0.091447     | 0           | 0.076621    | 0.019681    | 0           | 0.207545    | 0           |
| TCGA-DD- | 0.028953     | 0           | 0.035901    | 0.056896    | 0           | 0.312826    | 0           |
| TCGA-DD- | 0.023674     | 0           | 0           | 0.044444    | 0           | 0.306814    | 0           |
| TCGA-DD- | 0.002709     | 0           | 0.006256    | 0           | 0           | 0.063246    | 0.005571    |
| TCGA-DD- | 0            | 0.001352    | 0           | 0.03753     | 0           | 0.174838    | 0           |
| TCGA-DD- | 0.108435     | 0           | 0           | 0           | 0           | 0.194345    | 0           |
| TCGA-DD- | 0.039443     | 0           | 0.038115    | 0.104215    | 0           | 0.240133    | 0           |
| TCGA-DD- | 0.02415      | 0           | 0.035674    | 0.104191    | 0           | 0.127107    | 0           |
| TCGA-DD- | 0.156144     | 0           | 0.033338    | 0           | 0           | 0.135018    | 0           |
| TCGA-DD- | 0.010952     | 0           | 0.002601    | 0           | 0           | 0.335334    | 0           |
| TCGA-DD- | 0.011136     | 0           | 0.148191    | 0.355288    | 0           | 0           | 0.048149    |
| TCGA-DD- | 0.051478     | 0           | 0.049494    | 0.351374    | 0           | 0.021978    | 0.032796    |
| TCGA-DD- | 0            | 0           | 0           | 0.041955    | 0           | 0.305568    | 0           |
| TCGA-DD- | 0.097482     | 0           | 0.098028    | 0.094585    | 0           | 0.193494    | 0           |
| TCGA-DD- | 0.026652     | 0           | 0.009629    | 0.050756    | 0           | 0.216942    | 0           |
| TCGA-DD- | 0.040546     | 0           | 0.001828    | 0           | 0           | 0.189156    | 0           |
| TCGA-DD- | 0.072551     | 0           | 0.006952    | 0.070002    | 0           | 0.312341    | 0           |
| TCGA-DD- | 0.015978     | 0           | 0.02164     | 0.060989    | 0           | 0.356138    | 0           |
| TCGA-DD- | 0.010484     | 0           | 0           | 0.055008    | 0           | 0.270813    | 0           |
| TCGA-DD- | 0.140949     | 0           | 0.014586    | 0.102854    | 0           | 0.091742    | 0           |
| TCGA-DD- | 0.041434     | 0           | 0           | 0.088315    | 0           | 0.102773    | 0           |
| TCGA-DD- | 0.029329     | 0           | 0.038389    | 0.23962     | 0           | 0.171893    | 0           |
| TCGA-DD- | 0            | 0.001265    | 0.011131    | 0.130731    | 0           | 0.285769    | 0           |
| TCGA-DD- | 0.043923     | 0           | 0           | 0.068111    | 0           | 0.334944    | 0           |
| TCGA-DD- | 0.050042     | 0           | 0           | 0.013945    | 0           | 0.113568    | 0.017773    |
| TCGA-DD- | 0.079248     | 0           | 0           | 0.14902     | 0           | 0.262153    | 0           |
| TCGA-DD- | 0.061588     | 0           | 0.012207    | 0.078357    | 0           | 0.150182    | 0.014806    |
| TCGA-DD- | 0.093109     | 0.006       | 0           | 0.17986     | 0           | 0.359099    | 0           |
| TCGA-DD- | 0.052789     | 0           | 0           | 0.03756     | 0           | 0.252809    | 0.005961    |
| TCGA-DD- | 0.061567     | 0           | 0.014581    | 0.025879    | 0           | 0.325832    | 0           |
| TCGA-DD- | 0.004028     | 0           | 0.009886    | 0           | 0           | 0.157252    | 0           |
| TCGA-DD- | 0.01538      | 0           | 0           | 0.087264    | 0           | 0.308425    | 0           |
| TCGA-DD- | 0.059768     | 0           | 0.004224    | 0.110491    | 0           | 0.22088     | 0           |
| TCGA-DD- | 0.077149     | 0           | 0.006991    | 0.175374    | 0           | 0.340796    | 0           |
| TCGA-DD- | 0.029277     | 0           | 0.041278    | 0.248794    | 0           | 0.057156    | 0.020198    |
| TCGA-DD- | 0.040355     | 0           | 0.031928    | 0.058657    | 0           | 0.131529    | 0           |
| TCGA-DD- | 0.056864     | 0           | 0.022008    | 0.251047    | 0           | 0           | 0.030154    |
| TCGA-DD- | 0.054137     | 0           | 0.243019    | 0.299235    | 0           | 0           | 0.069595    |
| TCGA-DD- | 0.030849     | 0           | 0.045226    | 0.235532    | 0           | 0.108198    | 0           |
| TCGA-DD- | 0.037708     | 0           | 0.015646    | 0.192423    | 0           | 0.408544    | 0           |
| TCGA-DD- | 0.115808     | 0           | 0.038653    | 0.083731    | 0           | 0.261485    | 0           |
| TCGA-DD- | 0.085043     | 0           | 0           | 0.087194    | 0           | 0.181409    | 0           |
| TCGA-DD- | 0.014497     | 0           | 0.017417    | 0.105272    | 0           | 0.207825    | 0           |

|          |          |          |          |          |          |          |          |
|----------|----------|----------|----------|----------|----------|----------|----------|
| TCGA-DD- | 0        | 0.003807 | 0.106455 | 0.340514 | 0        | 0        | 0.107566 |
| TCGA-DD- | 0.009546 | 0        | 0.058919 | 0.158604 | 0        | 0.076583 | 0.015993 |
| TCGA-DD- | 0.068028 | 0        | 0.001627 | 0.05352  | 0        | 0.303462 | 0.014145 |
| TCGA-DD- | 0.011677 | 0        | 0        | 0.229775 | 0        | 0.037251 | 0        |
| TCGA-DD- | 0.006419 | 0        | 0.01705  | 0.104119 | 0        | 0.398633 | 0        |
| TCGA-DD- | 0.04074  | 0        | 0.004851 | 0.07473  | 0        | 0.13634  | 0        |
| TCGA-DD- | 0.036588 | 0        | 0.001057 | 0.071756 | 0        | 0.232098 | 0        |
| TCGA-DD- | 0.039944 | 0        | 0        | 0.055756 | 0        | 0.328312 | 0        |
| TCGA-DD- | 0.006056 | 0        | 0        | 0.074427 | 0        | 0.153804 | 0        |
| TCGA-DD- | 0.056203 | 0        | 0        | 0.058791 | 0        | 0.26886  | 0        |
| TCGA-DD- | 0.05665  | 0        | 0.042359 | 0.178099 | 0        | 0.139373 | 0        |
| TCGA-DD- | 0.022103 | 0        | 0.006717 | 0.05938  | 0        | 0.081428 | 0.003572 |
| TCGA-DD- | 0.013889 | 0        | 0.027415 | 0.151264 | 0        | 0.17938  | 0        |
| TCGA-DD- | 0.002677 | 0        | 0.040393 | 0.173576 | 0        | 0.226026 | 0.0022   |
| TCGA-DD- | 0.038153 | 0        | 0        | 0.131681 | 0        | 0.0944   | 0        |
| TCGA-DD- | 0.036928 | 0        | 0.014103 | 0.239391 | 0        | 0.01976  | 0.071021 |
| TCGA-DD- | 0.014999 | 0        | 0        | 0.126927 | 0        | 0.156971 | 0        |
| TCGA-DD- | 0.066707 | 0        | 0.006408 | 0.017635 | 0        | 0.203157 | 0        |
| TCGA-DD- | 0.065159 | 0        | 0.00693  | 0        | 0        | 0.16333  | 0.020929 |
| TCGA-DD- | 0        | 0        | 0        | 0.128538 | 0        | 0.149474 | 0        |
| TCGA-DD- | 0.043356 | 0        | 0.011599 | 0.168335 | 0        | 0.142831 | 0        |
| TCGA-DD- | 0.085151 | 0        | 0.059783 | 0.163473 | 0        | 0.033001 | 0.00306  |
| TCGA-DD- | 0.074795 | 0        | 0.084697 | 0.18521  | 0        | 0.140277 | 0.004198 |
| TCGA-DD- | 0.023405 | 0        | 0        | 0.086679 | 0        | 0.437405 | 0.057446 |
| TCGA-DD- | 0.003562 | 0        | 0        | 0.154474 | 0        | 0.293887 | 0        |
| TCGA-DD- | 0        | 0        | 0        | 0.011863 | 0        | 0.123943 | 0        |
| TCGA-DD- | 0.027125 | 0        | 0.029578 | 0.065631 | 0        | 0.192143 | 0.029554 |
| TCGA-DD- | 0.015654 | 0        | 0        | 0.02598  | 0        | 0.466137 | 0        |
| TCGA-DD- | 0.057415 | 0        | 0        | 0.103628 | 0        | 0.247243 | 0        |
| TCGA-DD- | 0.080378 | 0        | 0        | 0.03337  | 0        | 0.403823 | 0        |
| TCGA-DD- | 0.033296 | 0        | 0        | 0.029215 | 0        | 0.253199 | 0        |
| TCGA-G3- | 0.103415 | 0        | 0        | 0        | 0        | 0.222828 | 0        |
| TCGA-G3- | 0        | 0        | 0        | 0.176136 | 0        | 0.112684 | 0        |
| TCGA-G3- | 0.018427 | 0        | 0        | 0.070562 | 0        | 0.292823 | 0        |
| TCGA-G3- | 0.001626 | 0        | 0.002353 | 0.062847 | 0        | 0.188684 | 0        |
| TCGA-G3- | 0.061914 | 0        | 0        | 0.123975 | 0        | 0.234253 | 0        |
| TCGA-G3- | 0.050271 | 0        | 0        | 0.175768 | 0        | 0.178729 | 0        |
| TCGA-G3- | 0.023072 | 0        | 0.079027 | 0.148596 | 0        | 0.189296 | 0        |
| TCGA-G3- | 0        | 0        | 0.025529 | 0.161216 | 0        | 0.206784 | 0        |
| TCGA-G3- | 0.102533 | 0        | 0        | 0        | 0        | 0.144747 | 0        |
| TCGA-G3- | 0.005329 | 0        | 0.010758 | 0        | 0        | 0.330942 | 0        |
| TCGA-G3- | 0        | 0.003684 | 0        | 0.02604  | 0        | 0.068948 | 0        |
| TCGA-K7- | 0.000853 | 0        | 0.022134 | 0.108038 | 0        | 0.120923 | 0        |
| TCGA-O8- | 0.018733 | 0        | 0.006598 | 0.185575 | 0        | 0.143233 | 0.008066 |
| TCGA-QA- | 0.056891 | 0        | 0        | 0.056499 | 0        | 0.220383 | 0        |
| TCGA-RC- | 0.047322 | 0        | 0.075139 | 0.086284 | 0        | 0.122756 | 0.015243 |
| TCGA-RC- | 0.044543 | 0        | 0        | 0.073911 | 0        | 0.183853 | 0        |
| TCGA-RC- | 0.055778 | 0        | 0        | 0.134979 | 0        | 0.162065 | 0        |
| TCGA-UB- | 0.009568 | 0        | 0        | 0        | 0.007125 | 0.241298 | 0        |
| TCGA-UB- | 0.047933 | 0        | 0.028895 | 0.166321 | 0        | 0.12922  | 0        |
| TCGA-UB- | 0.047111 | 0        | 0.049556 | 0.287501 | 0        | 0.077261 | 0        |
| TCGA-XR- | 0.022204 | 0        | 0        | 0.055652 | 0        | 0.474048 | 0        |
| TCGA-XR- | 0.056749 | 0        | 0.011434 | 0.245908 | 0        | 0.120092 | 0.038054 |
| TCGA-ZP- | 0.00371  | 0.001155 | 0.090386 | 0.135906 | 0        | 0.162967 | 0.004046 |

for microenvironment by CIBERSORT web portal with the LM22 signature.

| T cells follicular | T cells regulatory | T cells gamma | NK cells repressed | NK cells activated | Monocytes | Macrophages | Macrophages |
|--------------------|--------------------|---------------|--------------------|--------------------|-----------|-------------|-------------|
| 0.062933           | 0.122847           | 0             | 0                  | 0.037746           | 0.02525   | 0.015053    | 0.069379    |
| 0.041661           | 0.047794           | 0             | 0                  | 0.027573           | 0.012743  | 0.04602     | 0.068241    |
| 0                  | 0.103384           | 0.000873      | 0                  | 0.083448           | 0         | 0           | 0.060848    |
| 0.006855           | 0.068391           | 0             | 0                  | 0.031529           | 0         | 0.147342    | 0.157367    |
| 0.036516           | 0.057375           | 0             | 0                  | 0.033084           | 0.026805  | 0.133047    | 0.105926    |
| 0                  | 0.048858           | 0.009274      | 0                  | 0.077297           | 0.040853  | 0.083598    | 0.166226    |
| 0.069755           | 0.086947           | 0             | 0.000897           | 0.031092           | 0         | 0.143392    | 0.092674    |
| 0                  | 0.106833           | 0.012714      | 0                  | 0.095674           | 0.008031  | 0.165286    | 0.073843    |
| 0                  | 0.011401           | 0             | 0                  | 0.061863           | 0         | 0.256051    | 0.040222    |
| 0                  | 0.005369           | 0.042871      | 0                  | 0.057687           | 0.002797  | 0.078044    | 0.170229    |
| 0.00418            | 0.003807           | 0             | 0                  | 0.071109           | 0.00893   | 0.118928    | 0.102427    |
| 0                  | 0.054234           | 0             | 0                  | 0.067465           | 0.019156  | 0.114982    | 0.058612    |
| 0.013839           | 0.06518            | 0             | 0.048125           | 0                  | 0.01174   | 0.352348    | 0.02843     |
| 0                  | 0.072603           | 0             | 0                  | 0.063923           | 0.034852  | 0.265343    | 0.078326    |
| 0                  | 0.048793           | 0             | 0                  | 0.088812           | 0.037478  | 0.116304    | 0.085451    |
| 0.000169           | 0.077048           | 0             | 0                  | 0.030299           | 0.009623  | 0.130151    | 0.064028    |
| 0.00462            | 0.005936           | 2.04E-05      | 0                  | 0.112043           | 0.018764  | 0.119169    | 0.0875      |
| 0                  | 0.078492           | 0             | 0.057788           | 0.082828           | 0.096553  | 0.123241    | 0.017999    |
| 0                  | 0.040001           | 0             | 0.049775           | 0.106225           | 0.031787  | 0.167187    | 0.027787    |
| 0.027047           | 0.055172           | 0             | 0                  | 0.040788           | 0.02485   | 0.056392    | 0.079121    |
| 0.022321           | 0.088935           | 0.020859      | 0                  | 0.065165           | 0.014425  | 0.058018    | 0.074732    |
| 0                  | 0.029537           | 0.035608      | 0                  | 0.050662           | 0.075518  | 0.049573    | 0.07677     |
| 0.006595           | 0.057498           | 0             | 0                  | 0.069291           | 0.034308  | 0.048814    | 0.113189    |
| 0                  | 0.048616           | 0.049134      | 0                  | 0.016292           | 0         | 0.218586    | 0.021452    |
| 0.002256           | 0.106961           | 0             | 0                  | 0.124467           | 0.012557  | 0.193522    | 0.028523    |
| 0.024712           | 0.050743           | 0             | 0                  | 0.047952           | 0.011855  | 0.033969    | 0.108742    |
| 0                  | 0.002103           | 0             | 0                  | 0.051972           | 0.033835  | 0.058758    | 0.159175    |
| 0.002769           | 0.021878           | 0.042071      | 0                  | 0.058651           | 0.005159  | 0.0394      | 0.089427    |
| 0.104695           | 0.003789           | 0             | 0.022924           | 0.057574           | 0.007706  | 0.036801    | 0.225044    |
| 0.048686           | 0.047843           | 0             | 0                  | 0.089729           | 0.024987  | 0.128578    | 0.109087    |
| 0                  | 0.028564           | 0             | 0                  | 0.069154           | 0.031737  | 0.050141    | 0.089002    |
| 0                  | 0.052036           | 0             | 0                  | 0.033425           | 0.011335  | 0.066544    | 0.133844    |
| 0                  | 0.038108           | 0.014006      | 0                  | 0.043035           | 0.00847   | 0.002323    | 0.040751    |
| 0.002134           | 0                  | 0.049986      | 0                  | 0.066299           | 0.07724   | 0.100098    | 0.147647    |
| 0.001483           | 0.024614           | 0.072524      | 0                  | 0.075983           | 0         | 0.055038    | 0.072456    |
| 0                  | 0.072604           | 0             | 0                  | 0.04269            | 0.01835   | 0.178939    | 0.103217    |
| 0                  | 0.061506           | 0             | 0                  | 0.035663           | 0.005094  | 0.055014    | 0.047226    |
| 0                  | 0.047254           | 0             | 0.011705           | 0.013241           | 0.004971  | 0.281535    | 0.106388    |
| 0.015517           | 0.01006            | 0             | 0                  | 0.001672           | 0.011087  | 0.173402    | 0.231219    |
| 0.002421           | 0.037189           | 0             | 0.004838           | 0.080835           | 0.054927  | 0.022382    | 0.020728    |
| 0                  | 0.121859           | 0             | 0                  | 0.077132           | 0.091634  | 0.129633    | 0.040072    |
| 0.030046           | 0.00379            | 0.057843      | 0                  | 0.103135           | 0         | 0.036083    | 0.083378    |
| 0.004675           | 0.011603           | 0.064247      | 0                  | 0.042626           | 0         | 0.033533    | 0.079148    |
| 0.032286           | 0.111287           | 0             | 0                  | 0.053231           | 0.010926  | 0.201       | 0.05855     |
| 0.046304           | 0.065212           | 0.004147      | 0                  | 0.075941           | 0         | 0.188961    | 0.141783    |
| 0.111351           | 0.013125           | 0             | 0                  | 0.033867           | 0.0092    | 0.079402    | 0.095605    |
| 0.046499           | 0.052706           | 0             | 0                  | 0.043103           | 0         | 0.034505    | 0.077476    |
| 0.019161           | 0                  | 0             | 0.001265           | 0.107017           | 0.033742  | 0.075986    | 0.07372     |
| 0.002692           | 0.008398           | 0.0219        | 0                  | 0                  | 0.009147  | 0.078023    | 0.090831    |
| 0                  | 0.059208           | 0             | 0                  | 0.033344           | 0.02006   | 0.058508    | 0.073924    |
| 0                  | 0                  | 0             | 0.056631           | 0.080846           | 0.013554  | 0.081913    | 0.137841    |
| 0                  | 0.097277           | 0             | 0                  | 0.075929           | 0.014707  | 0.09792     | 0.071937    |

|          |          |          |          |          |          |          |          |
|----------|----------|----------|----------|----------|----------|----------|----------|
| 0.028584 | 0.084132 | 0        | 0.002389 | 0.033173 | 0.025575 | 0.11001  | 0.062515 |
| 0.070134 | 0.159629 | 0        | 0        | 0.040026 | 0.019834 | 0.204715 | 0.054258 |
| 0        | 0.065208 | 0        | 0        | 0.050752 | 0.015354 | 0.071381 | 0.14542  |
| 0.041622 | 0.10128  | 0        | 0.033604 | 0.107972 | 0.020516 | 0.102454 | 0.086366 |
| 0        | 0.007704 | 0.056516 | 0        | 0.051218 | 0        | 0.109795 | 0.045885 |
| 0.000614 | 0.063734 | 0        | 0        | 0.052502 | 0        | 0.177917 | 0.044403 |
| 0.030822 | 0.011314 | 0        | 0        | 0.066293 | 0        | 0.215442 | 0.087336 |
| 0        | 0.042913 | 0        | 0        | 0.043939 | 0.012334 | 0        | 0.126984 |
| 0        | 0.077523 | 0        | 0        | 0.073661 | 0        | 0.387437 | 0.109426 |
| 0        | 0.093613 | 0.011742 | 0        | 0.075672 | 0.009534 | 0.02573  | 0.069768 |
| 0.04177  | 0.007975 | 0.064908 | 0        | 0.036193 | 0        | 0.012005 | 0.214528 |
| 0.000367 | 0        | 0.022325 | 0        | 0.098881 | 0.037461 | 0.063818 | 0.058574 |
| 0.016234 | 0.024408 | 0.055504 | 0        | 0.099516 | 0        | 0.036104 | 0.150134 |
| 0        | 0        | 0.063547 | 0        | 0.011376 | 0        | 0.002703 | 0.105136 |
| 0.005677 | 0.070685 | 0        | 0        | 0.074    | 0.023582 | 0.151482 | 0.081519 |
| 0.084818 | 0.101489 | 0.03993  | 0        | 0.019951 | 0        | 0.113524 | 0.100617 |
| 0        | 0.029206 | 0        | 0.048873 | 0.153247 | 0        | 0.097922 | 0.040951 |
| 0.034128 | 0.064858 | 0.011669 | 0.026814 | 0        | 0        | 0.246018 | 0.067258 |
| 0        | 0.015295 | 0.055846 | 0.085356 | 0        | 0.017872 | 0.179663 | 0.126081 |
| 0.001166 | 0.069483 | 0.009011 | 0        | 0.083728 | 0        | 0.146    | 0.073863 |
| 0.030354 | 0.074733 | 0        | 0        | 0.05575  | 0.007708 | 0.192614 | 0.08413  |
| 0.052936 | 0.004904 | 0        | 0.008193 | 0.055924 | 0.134039 | 0        | 0.146013 |
| 0.063662 | 0.056382 | 0        | 0        | 0.013159 | 0.020565 | 0.169527 | 0.063691 |
| 0        | 0.030363 | 0        | 0        | 0        | 0.019645 | 0.000326 | 0.048823 |
| 0        | 0.021292 | 0        | 0        | 0.068695 | 0.027935 | 0.080914 | 0.057904 |
| 0        | 0        | 0.024231 | 0        | 0.039876 | 0        | 0.53203  | 0.030056 |
| 0        | 0.062634 | 0        | 0        | 0.034802 | 0.009671 | 0.155432 | 0.136052 |
| 0        | 0.067046 | 0        | 0        | 0.031417 | 0.010901 | 0.046392 | 0.02837  |
| 0        | 0.038701 | 0.024506 | 0        | 0.053054 | 0.029033 | 0        | 0.137508 |
| 0        | 0.025456 | 0        | 0        | 0.05926  | 0.01271  | 0.018209 | 0.069146 |
| 0        | 0.061937 | 0        | 0        | 0.017322 | 0.020141 | 0.352718 | 0.094669 |
| 0        | 0.000274 | 0        | 0.048123 | 0.017203 | 0.076262 | 0.000691 | 0.125674 |
| 0        | 0.096057 | 0        | 0        | 0.101511 | 0.005321 | 0.096243 | 0.062826 |
| 0.041348 | 0.038671 | 0.003112 | 0        | 0.027863 | 0.003578 | 0.039964 | 0.141628 |
| 0        | 0.094319 | 0        | 0.060582 | 0        | 0.034931 | 0.107438 | 0.054483 |
| 0        | 0.086798 | 0.04475  | 0        | 0.042926 | 0.002189 | 0        | 0.090277 |
| 0.008111 | 0.013098 | 0        | 0        | 0.070159 | 0.020159 | 0.087621 | 0.16307  |
| 0.079587 | 0.040152 | 0.014419 | 0        | 0.009976 | 0.010203 | 0        | 0.128499 |
| 0.005245 | 0.035518 | 0        | 0        | 0.131478 | 0.02945  | 0.013588 | 0.131349 |
| 0        | 0.052932 | 0.020203 | 0        | 0.047417 | 0.019209 | 0.105776 | 0.060748 |
| 0        | 0.021978 | 0.10415  | 0        | 0.057321 | 0.044925 | 0.000572 | 0.093002 |
| 0.03001  | 0.055869 | 0        | 0        | 0.010761 | 0        | 0.628026 | 0.040386 |
| 0.033569 | 0.100711 | 0.028945 | 0        | 0.079229 | 0.02304  | 0.059711 | 0.161503 |
| 0        | 0.085636 | 0        | 0        | 0.025964 | 0.015814 | 0.13486  | 0.058163 |
| 0.072281 | 0.093333 | 0.031178 | 0        | 0.125915 | 0        | 0        | 0.024386 |
| 0.038134 | 0.071309 | 0.014382 | 0.006753 | 0.016659 | 0.008559 | 0.108452 | 0.163499 |
| 0.040691 | 0.026876 | 0        | 0        | 0.048161 | 0        | 0.133931 | 0.129948 |
| 0.058437 | 0.12439  | 0        | 0        | 0.108327 | 0.002905 | 0.140048 | 0.082874 |
| 0.017885 | 0        | 0        | 0.040809 | 0.047732 | 0.09461  | 0.033798 | 0.080025 |
| 0.03535  | 0.102415 | 0.004509 | 0        | 0.078334 | 0        | 0.194913 | 0.088626 |
| 0.008359 | 0.098793 | 0        | 0.005256 | 0.042837 | 0.032978 | 0.019572 | 0.164538 |
| 0        | 0.014042 | 0        | 0        | 0.046473 | 0.004931 | 0.020429 | 0.059724 |
| 0.077142 | 0.044239 | 0.015626 | 0        | 0        | 0.010623 | 0.082918 | 0.081909 |
| 0.019238 | 0.068142 | 0        | 0        | 0.017933 | 0.010775 | 0.043361 | 0.146762 |

| Macrophages | Dendritic c | Dendritic c | Mast cells | Mast cells | Eosinophil | Neutrophil | P-value |
|-------------|-------------|-------------|------------|------------|------------|------------|---------|
| 0.14138     | 0           | 0           | 0.009691   | 0          | 0          | 0          | 0.09    |
| 0.111055    | 0.004363    | 0           | 0.022208   | 0          | 0          | 0          | 0.17    |
| 0.213573    | 0.19489     | 0           | 0.062751   | 0          | 0          | 0          | 0.5     |
| 0.110637    | 0.021562    | 0           | 0.065004   | 0          | 0          | 0.002296   | 0       |
| 0.257716    | 0.147552    | 0           | 0.040033   | 0          | 0          | 0          | 0.41    |
| 0.124969    | 0.06425     | 0           | 0.069438   | 0          | 0          | 0          | 0.69    |
| 0.067991    | 0.064109    | 0           | 0.051243   | 0          | 0          | 0          | 0.67    |
| 0.258384    | 0.012264    | 0           | 0.137569   | 0          | 0          | 0          | 0.11    |
| 0.174642    | 0.045576    | 0           | 0.035921   | 0          | 0          | 0          | 0.09    |
| 0.118522    | 0.019549    | 0           | 0.108564   | 0          | 0          | 0.001074   | 0.1     |
| 0.171468    | 0.01179     | 0           | 0.068817   | 0          | 0          | 0.003967   | 0.25    |
| 0.207936    | 0.021604    | 0           | 0.075312   | 0          | 0          | 0.005768   | 0.5     |
| 0.277319    | 0.052738    | 0           | 0.071173   | 0          | 0.001326   | 0          | 0.01    |
| 0.181939    | 0           | 0           | 0.040715   | 0          | 0          | 0.048578   | 0.26    |
| 0.303237    | 0.002437    | 0           | 0          | 0          | 0          | 0.014708   | 0.16    |
| 0.215649    | 0.009465    | 0           | 0.031295   | 0          | 0          | 0.010367   | 0.11    |
| 0.102412    | 0.008357    | 0           | 0.244277   | 0          | 0          | 0.00578    | 0.34    |
| 0.062259    | 0.015489    | 0           | 0.119593   | 0          | 0          | 0.021259   | 0.31    |
| 0.09695     | 0           | 0           | 0.131401   | 0          | 0          | 0          | 0.31    |
| 0.113077    | 0.025161    | 0           | 0.015629   | 0          | 0          | 0          | 0.1     |
| 0.111339    | 0.03368     | 0           | 0          | 0          | 0          | 0.003406   | 0       |
| 0.257771    | 0           | 0.046005    | 0.031033   | 0          | 0          | 0          | 0.17    |
| 0.119808    | 0.018581    | 0           | 0.048328   | 0          | 0          | 0          | 0.41    |
| 0.282958    | 0.032972    | 0           | 0.026012   | 0          | 0          | 0          | 0.09    |
| 0.253904    | 0           | 0           | 0.029772   | 0          | 0          | 0.016509   | 0.5     |
| 0.185298    | 0.047145    | 0           | 0.026134   | 0          | 0.001603   | 0          | 0.73    |
| 0.111923    | 0.031       | 0           | 0.096488   | 0          | 0          | 0          | 0.36    |
| 0.177818    | 0.041777    | 0           | 0.183649   | 0          | 0          | 0.001094   | 0.35    |
| 0.179858    | 0           | 0           | 0          | 0          | 0          | 0.011476   | 0.33    |
| 0.168298    | 0.038447    | 0           | 0.092158   | 0          | 0          | 0.019664   | 0.72    |
| 0.180208    | 0.029633    | 0           | 0.039059   | 0          | 0          | 0.003271   | 0.31    |
| 0.088399    | 0.130034    | 0           | 0.055488   | 0          | 0          | 0          | 0.31    |
| 0.244289    | 0.09157     | 0           | 0.070472   | 0          | 0          | 0          | 0.94    |
| 0.156484    | 0.030363    | 0           | 0.165238   | 0          | 0          | 0.009184   | 0.19    |
| 0.177593    | 0.029888    | 0           | 0          | 0          | 0          | 0          | 0.72    |
| 0.183331    | 0.040089    | 0           | 0.03588    | 0          | 0          | 0.00776    | 0.1     |
| 0.084434    | 0.036034    | 0           | 0.033366   | 0          | 0          | 0.003595   | 0.18    |
| 0.140268    | 0.01658     | 0           | 0.028939   | 0          | 0          | 0          | 0.09    |
| 0.026173    | 0.021439    | 0           | 0.081015   | 0          | 0          | 0.000556   | 0.09    |
| 0.406928    | 0           | 0.016875    | 0.176131   | 0          | 0.002921   | 0.00266    | 0.12    |
| 0.106285    | 0           | 0           | 0.022316   | 0          | 0          | 0          | 0.52    |
| 0.198442    | 0.000147    | 0           | 0.088224   | 0          | 0          | 0.003548   | 0.82    |
| 0.11518     | 0.016407    | 0           | 0.032269   | 0          | 0          | 0          | 0.53    |
| 0.082904    | 0.03208     | 0           | 0.021032   | 0          | 0          | 0          | 0.1     |
| 0.11494     | 0.087326    | 0           | 0.012915   | 0          | 0          | 0          | 0.22    |
| 0.244703    | 0.008997    | 0           | 0.043675   | 0          | 0          | 0          | 0.46    |
| 0.055431    | 0           | 0           | 0.024294   | 0          | 0          | 0          | 0.39    |
| 0.135526    | 0.00671     | 0           | 0.127068   | 0          | 0          | 0          | 0.37    |
| 0.099819    | 0.018225    | 0           | 0.016644   | 0          | 0          | 0          | 0.08    |
| 0.142263    | 0.074594    | 0           | 0.038422   | 0          | 0          | 0          | 0.16    |
| 0.18129     | 0.009078    | 0           | 0.068984   | 0          | 0          | 0.016219   | 0.43    |
| 0.218932    | 0.013669    | 0           | 0.064618   | 0          | 0          | 0          | 0.42    |

|          |          |          |          |          |          |          |      |
|----------|----------|----------|----------|----------|----------|----------|------|
| 0.077137 | 0.004562 | 0        | 0.013583 | 0        | 0        | 0        | 0    |
| 0.096255 | 0.012366 | 0        | 0.023137 | 0        | 0        | 0        | 0.09 |
| 0.082057 | 0.061676 | 0        | 0.050964 | 0        | 0        | 0.016407 | 0.5  |
| 0.120822 | 0.016972 | 0        | 0.089689 | 0        | 0        | 0        | 0.55 |
| 0.143429 | 0.029735 | 0        | 0.029496 | 0        | 0        | 0        | 0.27 |
| 0.251717 | 0.106852 | 0        | 0.04179  | 0        | 0        | 0.003809 | 0.2  |
| 0.148571 | 0.015154 | 0        | 0.08357  | 0        | 0        | 0        | 0.17 |
| 0.245358 | 0.073474 | 0        | 0.030985 | 0        | 0        | 0        | 0.67 |
| 0.07962  | 0.007901 | 0        | 0.030145 | 0        | 0        | 0        | 0.07 |
| 0.14927  | 0.095493 | 0        | 0.085325 | 0        | 0        | 0        | 0.72 |
| 0.143758 | 0.029724 | 0        | 0.032657 | 0        | 0        | 0        | 0.01 |
| 0.541711 | 0        | 0        | 0        | 0.003663 | 0        | 0        | 0.36 |
| 0.147895 | 0.022179 | 0        | 0.073657 | 0        | 0        | 0.002421 | 0.01 |
| 0.2266   | 0.135974 | 0        | 0.009792 | 0        | 0        | 0        | 0.45 |
| 0.239397 | 0.0082   | 0        | 0.081222 | 0        | 0        | 0        | 0.35 |
| 0.114744 | 0.016708 | 0        | 0.027015 | 0        | 0        | 0        | 0.1  |
| 0.217136 | 0.00086  | 0        | 0.112908 | 0        | 0        | 0        | 0.41 |
| 0.23836  | 0        | 0        | 0.016987 | 0        | 0        | 0        | 0.09 |
| 0.139356 | 0.023555 | 0        | 0.100626 | 0        | 0        | 0        | 0.19 |
| 0.257155 | 0.016078 | 0        | 0.065505 | 0        | 0        | 0        | 0.18 |
| 0.107833 | 0.028614 | 0        | 0.052143 | 0        | 0        | 0        | 0.07 |
| 0.17328  | 0        | 0        | 0.076558 | 0        | 0        | 0.003686 | 0.45 |
| 0.055112 | 0.031083 | 0        | 0.037643 | 0        | 0        | 0        | 0.01 |
| 0.166775 | 0.100386 | 0        | 0.012293 | 0        | 0        | 0.016455 | 0.09 |
| 0.086177 | 0.14468  | 0        | 0.060482 | 0        | 0        | 0        | 0.53 |
| 0.199144 | 0.002958 | 0        | 0.035899 | 0        | 0        | 0        | 0.01 |
| 0.13625  | 0.067502 | 0        | 0.053056 | 0        | 0        | 0.00057  | 0.01 |
| 0.163106 | 0.114365 | 0        | 0.030633 | 0        | 0        | 0        | 0.38 |
| 0.242333 | 0.010778 | 0        | 0.055801 | 0        | 0        | 0        | 0.23 |
| 0.132546 | 0.119161 | 0        | 0.045939 | 0        | 0        | 0        | 0.84 |
| 0.085532 | 0.004844 | 0        | 0.047125 | 0        | 0        | 0        | 0.01 |
| 0.181377 | 0.002949 | 0        | 0.151363 | 0        | 0        | 0.069841 | 0.66 |
| 0.193353 | 0.084039 | 0        | 0.04033  | 0        | 0        | 0.0315   | 0.01 |
| 0.23707  | 0.009739 | 0        | 0.074143 | 0        | 0        | 0.001074 | 0.18 |
| 0.245443 | 0.044653 | 0        | 0.091614 | 0        | 0.000754 | 0.010272 | 0.19 |
| 0.2236   | 0.017819 | 0        | 0.071499 | 0        | 0        | 0        | 0.66 |
| 0.119833 | 0        | 0        | 0.106272 | 0        | 0.006908 | 0        | 0.19 |
| 0.225182 | 0.026104 | 0        | 0.025887 | 0        | 0        | 0        | 0.22 |
| 0.132352 | 0.00933  | 0        | 0.118162 | 0        | 0        | 0        | 0.84 |
| 0.227821 | 0.156005 | 0        | 0.027537 | 0        | 0.035072 | 0        | 0.34 |
| 0.165145 | 0        | 0        | 0.162464 | 0        | 0        | 0.003414 | 0.66 |
| 0.12112  | 0.002347 | 0        | 0.012517 | 0        | 0        | 0.000293 | 0.01 |
| 0.200091 | 0.012008 | 0        | 0.047472 | 0        | 0        | 0.001774 | 0.31 |
| 0.219462 | 0.044695 | 0        | 0.053201 | 0        | 0        | 0        | 0.19 |
| 0.157071 | 0.022394 | 0.003551 | 0.069    | 0        | 0        | 0.067117 | 0.7  |
| 0.126616 | 0.059734 | 0        | 0.03916  | 0        | 0        | 0        | 0.69 |
| 0.221913 | 0.035357 | 0        | 0.060816 | 0        | 0        | 0        | 0.11 |
| 0.053365 | 0.010836 | 0        | 0.065996 | 0        | 0        | 0        | 0.46 |
| 0.233422 | 0.005741 | 0        | 0.170435 | 0        | 0.00877  | 0.008782 | 0.55 |
| 0.08011  | 0        | 0        | 0.038865 | 0        | 0        | 0.004508 | 0.04 |
| 0.076438 | 0.040783 | 0        | 0.049018 | 0        | 0        | 0        | 0    |
| 0.217137 | 0.047876 | 0        | 0.037484 | 0        | 0        | 0        | 0.94 |
| 0.215306 | 0        | 0        | 0        | 0        | 0        | 0        | 0.68 |
| 0.132022 | 0.130242 | 0        | 0.032373 | 0        | 0        | 0.000984 | 0.11 |

Correlation RMSE

|          |          |
|----------|----------|
| 0.112244 | 1.077594 |
| 0.061887 | 1.082619 |
| 0.007292 | 1.090028 |
| 0.446785 | 0.893801 |
| 0.018117 | 1.095433 |
| -0.01079 | 1.112467 |
| -0.00833 | 1.088867 |
| 0.080917 | 1.067102 |
| 0.108697 | 1.061401 |
| 0.09675  | 1.057175 |
| 0.045289 | 1.077205 |
| 0.006506 | 1.091668 |
| 0.184849 | 1.051872 |
| 0.043842 | 1.096809 |
| 0.068761 | 1.074691 |
| 0.07936  | 1.060135 |
| 0.030208 | 1.086767 |
| 0.036658 | 1.064799 |
| 0.036624 | 1.087293 |
| 0.098294 | 1.052495 |
| 0.350171 | 0.946354 |
| 0.062729 | 1.073571 |
| 0.020169 | 1.076434 |
| 0.109617 | 1.062808 |
| 0.007086 | 1.106995 |
| -0.01727 | 1.10578  |
| 0.02832  | 1.095123 |
| 0.028534 | 1.082483 |
| 0.032423 | 1.119704 |
| -0.01593 | 1.100949 |
| 0.037161 | 1.084747 |
| 0.036967 | 1.087809 |
| -0.03289 | 1.10392  |
| 0.055755 | 1.077491 |
| -0.01639 | 1.12257  |
| 0.088795 | 1.059609 |
| 0.059611 | 1.087953 |
| 0.105901 | 1.067523 |
| 0.108678 | 1.082748 |
| 0.075481 | 1.068082 |
| 0.004789 | 1.103904 |
| -0.02499 | 1.115517 |
| 0.003687 | 1.119233 |
| 0.087303 | 1.064357 |
| 0.049939 | 1.085553 |
| 0.01131  | 1.089403 |
| 0.022168 | 1.078458 |
| 0.025954 | 1.086263 |
| 0.121656 | 1.066638 |
| 0.068471 | 1.055539 |
| 0.014765 | 1.099617 |
| 0.014964 | 1.089344 |

|          |          |
|----------|----------|
| 0.253404 | 0.987074 |
| 0.100779 | 1.054065 |
| 0.006434 | 1.099656 |
| 0.001486 | 1.110301 |
| 0.042322 | 1.094906 |
| 0.05359  | 1.077753 |
| 0.065125 | 1.074677 |
| -0.00636 | 1.105373 |
| 0.134103 | 1.075316 |
| -0.01497 | 1.095214 |
| 0.188972 | 1.040715 |
| 0.028454 | 1.125235 |
| 0.183664 | 1.033568 |
| 0.012681 | 1.096835 |
| 0.028748 | 1.086531 |
| 0.086208 | 1.065404 |
| 0.01859  | 1.107331 |
| 0.11169  | 1.06012  |
| 0.055672 | 1.073277 |
| 0.060789 | 1.079605 |
| 0.136228 | 1.04146  |
| 0.013114 | 1.086972 |
| 0.197032 | 1.00555  |
| 0.112282 | 1.053877 |
| 0.004367 | 1.096993 |
| 0.189314 | 1.091357 |
| 0.191498 | 1.014722 |
| 0.023592 | 1.093338 |
| 0.048245 | 1.084817 |
| -0.02674 | 1.104667 |
| 0.180335 | 1.038854 |
| -0.00215 | 1.090788 |
| 0.20223  | 1.012886 |
| 0.060981 | 1.079331 |
| 0.054649 | 1.065772 |
| -0.00407 | 1.101316 |
| 0.054414 | 1.089406 |
| 0.050899 | 1.075277 |
| -0.02718 | 1.129379 |
| 0.030367 | 1.076556 |
| -0.00264 | 1.100904 |
| 0.19362  | 1.110746 |
| 0.037251 | 1.097021 |
| 0.055054 | 1.072338 |
| -0.01222 | 1.109363 |
| -0.01024 | 1.099553 |
| 0.08097  | 1.067579 |
| 0.010393 | 1.105053 |
| 0.001491 | 1.086738 |
| 0.161387 | 1.03419  |
| 0.271381 | 0.988286 |
| -0.03285 | 1.122101 |
| -0.00874 | 1.106849 |
| 0.081072 | 1.058668 |
