# Supplementary material for: Immune-Related lncRNAs with WGCNA Identified the Function of SNHG10 in HBV-Related Hepatocellular Carcinoma
Source: Hindawi journal article supplement (doi:10.1155/2022/9332844), 2022-07-06
Supplement: f1 [file 9332844.f1.zip]

**Supplementary table 7: Lasso regression was constructed examining the relationship between**

| id      | futime   | fustat | HAND2-A  | LINC0084 | SNHG10   | MALAT1   | LINC00461 |
|---------|----------|--------|----------|----------|----------|----------|-----------|
| TCGA-DD | 0.024658 | 0      | 5.488987 | 4.942339 | 5.734072 | 6.418455 | 6.233542  |
| TCGA-DD | 0.043836 | 1      | 5.086645 | 4.420035 | 5.345145 | 6.756209 | 5.912736  |
| TCGA-G3 | 0.073973 | 1      | 4.714085 | 4.909053 | 4.855418 | 5.685242 | 6.608918  |
| TCGA-BC | 0.249315 | 1      | 6.024566 | 5.50946  | 6.617806 | 7.126636 | 6.76604   |
| TCGA-QA | 0.257534 | 0      | 6.020467 | 5.690776 | 5.420007 | 5.695042 | 6.775527  |
| TCGA-DD | 0.315068 | 1      | 5.627415 | 5.586319 | 5.303297 | 5.572877 | 6.362012  |
| TCGA-DD | 0.375342 | 0      | 5.516721 | 5.04679  | 4.88591  | 5.486244 | 6.48537   |
| TCGA-DD | 0.465753 | 0      | 5.778103 | 5.344724 | 5.397479 | 5.721216 | 6.402636  |
| TCGA-DD | 0.534247 | 1      | 5.638384 | 5.705247 | 6.847672 | 6.537187 | 6.642911  |
| TCGA-UB | 0.586301 | 1      | 6.095152 | 5.18131  | 5.983797 | 6.50589  | 6.476311  |
| TCGA-DD | 0.610959 | 1      | 5.10253  | 4.69821  | 5.840106 | 6.585946 | 5.800904  |
| TCGA-G3 | 0.983562 | 1      | 5.371785 | 4.723641 | 5.301474 | 6.243307 | 6.127427  |
| TCGA-G3 | 0.989041 | 0      | 5.934017 | 5.8733   | 6.507891 | 6.932761 | 6.574412  |
| TCGA-DD | 1.021918 | 1      | 5.773481 | 5.423322 | 6.132976 | 6.635177 | 6.532024  |
| TCGA-DD | 1.043836 | 1      | 5.369692 | 5.231394 | 5.745827 | 6.519411 | 5.625349  |
| TCGA-DD | 1.136986 | 1      | 5.778195 | 5.528188 | 6.369772 | 6.662698 | 6.525894  |
| TCGA-DD | 1.164384 | 1      | 5.937116 | 5.577589 | 6.740173 | 6.400534 | 6.678552  |
| TCGA-DD | 1.183562 | 1      | 5.54092  | 5.28526  | 5.24966  | 6.710947 | 6.232186  |
| TCGA-G3 | 1.238356 | 1      | 6.023869 | 5.083099 | 6.679187 | 6.870045 | 6.170819  |
| TCGA-DD | 1.241096 | 0      | 5.921591 | 5.131529 | 6.143852 | 6.559177 | 6.114929  |
| TCGA-DD | 1.284932 | 1      | 5.922852 | 5.720591 | 6.276976 | 6.58115  | 6.562681  |
| TCGA-DD | 1.309589 | 0      | 5.228204 | 5.262008 | 5.778695 | 5.778695 | 5.731159  |
| TCGA-G3 | 1.315068 | 0      | 5.741701 | 5.591982 | 5.977014 | 6.695799 | 6.200492  |
| TCGA-UB | 1.369863 | 0      | 5.917536 | 5.527667 | 4.998137 | 6.374121 | 6.30647   |
| TCGA-K7 | 1.40274  | 0      | 5.214431 | 5.34954  | 5.545056 | 6.44083  | 5.783986  |
| TCGA-DD | 1.520548 | 0      | 5.955096 | 5.425438 | 6.929826 | 7.09118  | 6.509656  |
| TCGA-G3 | 1.60274  | 0      | 5.257997 | 4.665329 | 5.562945 | 6.01287  | 5.976364  |
| TCGA-DD | 1.608219 | 0      | 5.891579 | 4.825566 | 6.86178  | 6.944607 | 6.555914  |
| TCGA-DD | 1.665753 | 0      | 5.713855 | 5.575179 | 5.697362 | 6.326184 | 6.313705  |
| TCGA-DD | 1.742466 | 0      | 5.733628 | 5.489646 | 5.691915 | 6.343376 | 6.302378  |
| TCGA-RC | 1.753425 | 0      | 5.95393  | 5.080307 | 5.688125 | 6.36195  | 6.581917  |
| TCGA-XR | 1.89863  | 1      | 5.662101 | 4.54015  | 5.688105 | 5.811629 | 6.064906  |
| TCGA-ZP | 1.934247 | 0      | 5.812765 | 5.349147 | 6.286445 | 6.670813 | 6.446043  |
| TCGA-DD | 1.978082 | 0      | 4.446955 | 5.241987 | 5.976393 | 5.195837 | 6.145884  |
| TCGA-G3 | 2.136986 | 0      | 5.768689 | 5.110452 | 6.062564 | 6.709392 | 6.157602  |
| TCGA-DD | 2.219178 | 0      | 5.369546 | 5.48958  | 5.423353 | 6.145212 | 6.279151  |
| TCGA-DD | 2.460274 | 0      | 5.893712 | 5.852219 | 5.924388 | 6.120317 | 6.33351   |
| TCGA-DD | 2.873973 | 0      | 5.383542 | 4.868094 | 6.428547 | 6.610636 | 6.08878   |
| TCGA-DD | 3.136986 | 0      | 4.85459  | 5.102441 | 3.900887 | 5.708885 | 5.775411  |
| TCGA-DD | 3.40274  | 0      | 5.971831 | 5.264816 | 6.519267 | 6.612319 | 6.607139  |
| TCGA-DD | 3.684932 | 0      | 5.838829 | 5.714393 | 6.759372 | 6.49671  | 6.484849  |
| TCGA-DD | 4.443836 | 1      | 5.217759 | 5.013591 | 6.273029 | 6.461477 | 6.20028   |
| TCGA-G3 | 4.482192 | 0      | 5.946828 | 5.578501 | 4.818549 | 6.419515 | 6.505826  |
| TCGA-DD | 4.616438 | 1      | 5.842533 | 4.944043 | 6.305298 | 6.691761 | 6.383795  |
| TCGA-G3 | 4.873973 | 0      | 5.871567 | 5.550449 | 6.85576  | 6.96233  | 6.542569  |
| TCGA-DD | 4.942466 | 0      | 5.963319 | 5.549063 | 6.044418 | 7.006703 | 6.434098  |
| TCGA-DD | 6.30411  | 0      | 5.572766 | 5.124104 | 5.305378 | 5.718791 | 6.385074  |
| TCGA-DD | 6.30411  | 0      | 5.608768 | 4.961405 | 4.138715 | 5.965839 | 6.433299  |
| TCGA-DD | 6.367123 | 0      | 5.752302 | 5.295068 | 6.198549 | 6.174328 | 6.234783  |

|                   |   |          |          |          |          |          |
|-------------------|---|----------|----------|----------|----------|----------|
| TCGA-DD- 6.616438 | 0 | 5.58704  | 5.027676 | 5.604789 | 6.44963  | 6.26921  |
| TCGA-DD- 6.726027 | 0 | 5.866755 | 5.358629 | 6.290518 | 6.873176 | 6.039266 |
| TCGA-DD- 0.032877 | 1 | 6.233542 | 6.598036 | 5.286043 | 5.696466 | 5.574801 |
| TCGA-5C- 0.054795 | 0 | 5.912736 | 6.060228 | 5.765107 | 5.82069  | 5.528821 |
| TCGA-DD- 0.50137  | 0 | 6.608918 | 5.641854 | 5.558546 | 5.888259 | 5.774627 |
| TCGA-DD- 0.950685 | 0 | 6.76604  | 6.683665 | 5.3745   | 5.891648 | 4.626664 |
| TCGA-DD- 1.194521 | 0 | 6.775527 | 6.594409 | 4.80812  | 5.768344 | 5.447231 |
| TCGA-DD- 1.254795 | 0 | 6.362012 | 6.026145 | 5.31301  | 5.798306 | 5.617917 |
| TCGA-RC- 1.282192 | 0 | 6.48537  | 6.076888 | 5.695478 | 6.302334 | 5.765265 |
| TCGA-G3- 1.30411  | 0 | 6.402636 | 6.691869 | 5.019506 | 5.702274 | 4.760099 |
| TCGA-UB- 1.331507 | 0 | 6.642911 | 6.53125  | 5.846285 | 6.200381 | 5.76164  |
| TCGA-O8- 1.473973 | 0 | 6.476311 | 6.253341 | 5.754917 | 5.840112 | 5.172824 |
| TCGA-DD- 1.512329 | 0 | 5.800904 | 5.936229 | 4.499185 | 5.661682 | 5.512967 |
| TCGA-DD- 1.520548 | 0 | 6.127427 | 6.544849 | 4.306899 | 6.218041 | 5.724972 |
| TCGA-DD- 1.545205 | 0 | 6.574412 | 6.562583 | 5.864995 | 6.102819 | 5.2501   |
| TCGA-DD- 1.550685 | 0 | 6.532024 | 6.784625 | 4.801723 | 5.308943 | 3.680121 |
| TCGA-DD- 1.572603 | 0 | 5.625349 | 5.70988  | 4.887424 | 5.565912 | 5.913018 |
| TCGA-DD- 1.575342 | 0 | 6.525894 | 6.676668 | 5.152536 | 5.81652  | 5.567867 |
| TCGA-RC- 1.610959 | 0 | 6.678552 | 6.372537 | 5.768507 | 5.06679  | 5.286421 |
| TCGA-DD- 1.747945 | 0 | 6.232186 | 6.240525 | 4.955535 | 5.666243 | 5.54236  |
| TCGA-DD- 1.764384 | 0 | 6.170819 | 5.915784 | 5.115269 | 5.966469 | 5.068223 |
| TCGA-G3- 1.794521 | 0 | 6.114929 | 5.303986 | 5.162147 | 6.080831 | 5.260093 |
| TCGA-DD- 1.80274  | 0 | 6.562681 | 6.192586 | 5.67674  | 5.967611 | 5.607423 |
| TCGA-DD- 1.841096 | 0 | 5.731159 | 4.446074 | 5.089628 | 4.95029  | 5.733002 |
| TCGA-DD- 2.090411 | 0 | 6.200492 | 6.346932 | 5.508868 | 5.841376 | 5.360289 |
| TCGA-DD- 2.923288 | 0 | 6.30647  | 6.361919 | 5.126471 | 5.827149 | 5.360931 |
| TCGA-DD- 2.972603 | 0 | 5.783986 | 5.783986 | 6.042425 | 6.265332 | 5.293693 |
| TCGA-DD- 3.339726 | 0 | 6.509656 | 5.845534 | 5.278016 | 5.218101 | 5.786368 |
| TCGA-DD- 3.372603 | 0 | 5.976364 | 6.219456 | 5.386314 | 5.125426 | 5.89737  |
| TCGA-DD- 3.378082 | 0 | 6.555914 | 6.333648 | 5.574897 | 5.506936 | 5.223877 |
| TCGA-DD- 3.547945 | 0 | 6.313705 | 5.949066 | 5.403605 | 5.990549 | 5.341029 |
| TCGA-DD- 3.567123 | 0 | 6.302378 | 5.770478 | 6.164354 | 6.313578 | 5.136054 |
| TCGA-XR- 3.668493 | 0 | 6.581917 | 6.286031 | 5.111166 | 5.797686 | 5.706305 |
| TCGA-DD- 3.90137  | 0 | 6.064906 | 5.454632 | 5.160569 | 5.698051 | 5.917159 |
| TCGA-DD- 3.972603 | 0 | 6.446043 | 6.527838 | 5.072991 | 5.826217 | 4.564076 |
| TCGA-2Y- 3.978082 | 0 | 6.145884 | 6.369189 | 5.143595 | 5.807392 | 5.244258 |
| TCGA-DD- 4.09589  | 0 | 6.157602 | 5.649753 | 5.430517 | 6.228321 | 5.798903 |
| TCGA-DD- 4.194521 | 0 | 6.279151 | 6.300055 | 5.181519 | 5.443869 | 5.924748 |
| TCGA-DD- 4.279452 | 0 | 6.33351  | 6.674142 | 4.465115 | 5.734194 | 5.340228 |
| TCGA-DD- 4.293151 | 0 | 6.08878  | 5.818219 | 5.274835 | 5.961412 | 5.423522 |
| TCGA-DD- 4.30137  | 0 | 5.775411 | 5.562627 | 4.725981 | 5.407061 | 4.968616 |
| TCGA-2Y- 4.449315 | 1 | 6.607139 | 6.326132 | 5.312782 | 5.826465 | 5.312782 |
| TCGA-DD- 4.994521 | 0 | 6.484849 | 6.657015 | 5.955217 | 6.213246 | 5.751938 |
| TCGA-DD- 5.139726 | 0 | 6.302378 | 5.770478 | 5.440979 | 5.882598 | 5.249999 |
| TCGA-DD- 5.205479 | 0 | 6.581917 | 6.286031 | 5.362682 | 5.986975 | 5.560638 |
| TCGA-DD- 5.520548 | 0 | 6.064906 | 5.454632 | 5.36912  | 6.102185 | 5.293232 |
| TCGA-DD- 5.556164 | 0 | 6.446043 | 6.527838 | 4.54007  | 5.471899 | 5.780589 |
| TCGA-DD- 5.983562 | 0 | 6.145884 | 6.369189 | 4.270319 | 5.124882 | 5.212626 |
| TCGA-DD- 6.032877 | 0 | 6.157602 | 5.649753 | 4.385964 | 6.012465 | 5.476146 |
| TCGA-DD- 6.347945 | 0 | 6.279151 | 6.300055 | 5.671615 | 5.936468 | 5.5201   |
| TCGA-DD- 6.884932 | 0 | 6.33351  | 6.674142 | 5.953862 | 5.719843 | 5.25252  |

|          |          |   |          |          |          |          |          |
|----------|----------|---|----------|----------|----------|----------|----------|
| TCGA-DD- | 7.473973 | 0 | 6.08878  | 5.818219 | 5.895508 | 5.907665 | 5.686224 |
| TCGA-DD- | 7.539726 | 0 | 5.775411 | 5.562627 | 4.93828  | 4.871267 | 4.995589 |
| TCGA-2Y- | 10.06849 | 0 | 6.607139 | 6.326132 | 5.638706 | 5.912209 | 5.949438 |

en gene signature and HCC risk.

| LBX2-AS1 | MIR31HG  | SEMA6A-1 | LINC01271 | LINC00511 | CTBP1-AS | LINC00201 | riskScore |
|----------|----------|----------|-----------|-----------|----------|-----------|-----------|
| 6.598036 | 5.467797 | 5.544474 | 6.289419  | 5.677501  | 5.734072 | 6.418455  | 3469.004  |
| 6.060228 | 5.224955 | 5.442542 | 6.796668  | 6.702726  | 5.345145 | 6.756209  | 11576.85  |
| 5.641854 | 5.069033 | 5.10958  | 6.084574  | 5.746819  | 4.855418 | 5.685242  | 6338.786  |
| 6.683665 | 5.955442 | 6.558604 | 6.832629  | 6.695206  | 6.617806 | 7.126636  | 5844.619  |
| 6.594409 | 6.05214  | 5.324645 | 5.974124  | 6.361379  | 5.420007 | 5.695042  | 3268.22   |
| 6.026145 | 5.927967 | 4.617974 | 6.110758  | 6.609862  | 5.303297 | 5.572877  | 8844.063  |
| 6.076888 | 5.835581 | 5.028664 | 5.508868  | 5.841376  | 5.360289 | 4.942906  | 2247.277  |
| 6.691869 | 5.731406 | 5.195691 | 5.126471  | 5.827149  | 5.360931 | 5.421472  | 6117.757  |
| 6.53125  | 5.950026 | 6.678042 | 6.042425  | 6.265332  | 5.293693 | 4.616783  | 5014.315  |
| 6.253341 | 5.962374 | 5.899229 | 5.278016  | 5.218101  | 5.786368 | 5.86327   | 3294.047  |
| 5.936229 | 5.341947 | 6.625627 | 5.386314  | 5.125426  | 5.89737  | 5.710692  | 2816.193  |
| 6.544849 | 5.464882 | 5.301474 | 5.574897  | 5.506936  | 5.223877 | 4.861826  | 9369.439  |
| 6.562583 | 6.009752 | 6.949441 | 5.403605  | 5.990549  | 5.341029 | 4.664388  | 3420.671  |
| 6.784625 | 5.640294 | 6.265881 | 6.164354  | 6.313578  | 5.136054 | 4.616017  | 6334.928  |
| 5.70988  | 5.603002 | 6.015328 | 5.111166  | 5.797686  | 5.706305 | 5.354859  | 4068.752  |
| 6.676668 | 5.819237 | 6.125712 | 5.160569  | 5.698051  | 5.917159 | 5.365515  | 6745.042  |
| 6.372537 | 6.099958 | 6.686027 | 5.072991  | 5.826217  | 4.564076 | 4.319113  | 4011.044  |
| 6.240525 | 5.666989 | 6.049617 | 5.143595  | 5.807392  | 5.244258 | 5.079854  | 3273.744  |
| 5.915784 | 5.888577 | 6.983047 | 7.079722  | 6.902626  | 6.679187 | 6.870045  | 2197.486  |
| 5.303986 | 5.807165 | 6.585578 | 7.071958  | 6.687896  | 6.143852 | 6.559177  | 2134.876  |
| 6.192586 | 5.941505 | 6.863585 | 6.865875  | 6.687705  | 6.276976 | 6.58115   | 2616.065  |
| 4.446074 | 5.446025 | 4.908997 | 6.45777   | 5.950922  | 5.778695 | 5.778695  | 3899.734  |
| 6.346932 | 5.906064 | 6.683716 | 6.545407  | 6.355468  | 5.977014 | 6.695799  | 2015.595  |
| 6.361919 | 5.896784 | 5.600079 | 5.534817  | 6.742746  | 4.998137 | 6.374121  | 2011.128  |
| 5.783986 | 5.365182 | 6.797107 | 7.134222  | 6.186473  | 5.545056 | 6.44083   | 1940.258  |
| 5.845534 | 5.801375 | 7.362478 | 7.192027  | 7.12395   | 6.929826 | 7.09118   | 3110.343  |
| 6.219456 | 5.243828 | 5.481299 | 5.833172  | 6.216     | 5.562945 | 6.01287   | 2415.08   |
| 6.333648 | 5.872923 | 6.942816 | 6.949081  | 6.849014  | 6.86178  | 6.944607  | 3819.881  |
| 5.949066 | 6.686958 | 6.02736  | 6.570485  | 6.232311  | 5.697362 | 6.326184  | 3335.689  |
| 5.770478 | 6.556045 | 6.151182 | 6.489374  | 6.423971  | 5.691915 | 6.343376  | 2277.738  |
| 6.286031 | 6.469365 | 6.743961 | 7.240866  | 6.591807  | 5.688125 | 6.36195   | 2692.243  |
| 5.454632 | 6.253803 | 5.17015  | 5.933915  | 6.489888  | 5.688105 | 5.811629  | 2357.625  |
| 6.527838 | 6.716189 | 6.709375 | 6.455638  | 6.708879  | 6.286445 | 6.670813  | 2785.035  |
| 6.369189 | 6.279326 | 5.549349 | 5.901263  | 5.901263  | 5.976393 | 5.195837  | 4191.313  |
| 5.649753 | 6.400848 | 6.382944 | 6.846748  | 6.551455  | 6.062564 | 6.709392  | 2616.655  |
| 6.300055 | 6.160484 | 5.817935 | 6.108363  | 6.533676  | 5.423353 | 6.145212  | 3326.649  |
| 6.674142 | 6.785747 | 6.476496 | 6.647522  | 6.33351   | 5.924388 | 6.120317  | 2140.098  |
| 5.818219 | 5.967302 | 6.871274 | 7.053274  | 6.807096  | 6.428547 | 6.610636  | 2768.597  |
| 5.562627 | 6.292642 | 4.6541   | 6.24646   | 5.188837  | 3.900887 | 5.708885  | 4187.793  |
| 6.326132 | 6.413731 | 6.154841 | 6.998426  | 6.717333  | 6.519267 | 6.612319  | 6060.214  |
| 6.657015 | 6.424678 | 7.053228 | 7.06214   | 6.911509  | 6.759372 | 6.49671   | 2778.923  |
| 4.843073 | 6.17464  | 6.39403  | 6.629375  | 6.717921  | 6.273029 | 6.461477  | 3081.643  |
| 6.223477 | 6.693885 | 4.961628 | 5.611267  | 6.636884  | 4.818549 | 6.419515  | 4417.112  |
| 6.084229 | 6.259725 | 6.647637 | 6.857118  | 6.31756   | 6.305298 | 6.691761  | 2278.181  |
| 5.853955 | 6.580509 | 7.124318 | 7.345441  | 7.037985  | 6.85576  | 6.96233   | 4158.267  |
| 6.163157 | 6.522423 | 6.823874 | 6.775507  | 6.867256  | 6.044418 | 7.006703  | 2089.273  |
| 6.05505  | 5.124104 | 5.569463 | 6.217989  | 6.164154  | 5.305378 | 5.718791  | 2541.634  |
| 6.371288 | 4.961405 | 5.195684 | 6.069223  | 6.637421  | 4.138715 | 5.965839  | 3587.501  |
| 6.497939 | 5.295068 | 6.284324 | 6.827556  | 6.778821  | 6.198549 | 6.174328  | 3604.523  |

|          |          |          |          |          |          |          |          |
|----------|----------|----------|----------|----------|----------|----------|----------|
| 5.996659 | 5.027676 | 5.471315 | 6.286909 | 5.68156  | 5.604789 | 6.44963  | 3255.055 |
| 6.253348 | 6.289419 | 6.561209 | 6.873425 | 6.914324 | 6.290518 | 6.873176 | 2612.596 |
| 5.192366 | 6.796668 | 6.210844 | 6.18511  | 5.670777 | 5.286043 | 5.696466 | 1378.95  |
| 5.409828 | 6.084574 | 6.519135 | 5.671736 | 6.275188 | 5.765107 | 5.82069  | 1025.888 |
| 4.003581 | 6.832629 | 5.997888 | 6.184702 | 6.161962 | 5.558546 | 5.888259 | 1290.155 |
| 4.626664 | 5.974124 | 5.959609 | 6.425407 | 5.817659 | 5.3745   | 5.891648 | 1591.784 |
| 5.051788 | 6.110758 | 4.650078 | 5.553093 | 5.11837  | 4.80812  | 5.768344 | 1917.699 |
| 4.937531 | 5.508868 | 5.995411 | 6.322123 | 5.571622 | 5.31301  | 5.798306 | 1102.923 |
| 5.290037 | 5.126471 | 6.761974 | 6.422642 | 6.222586 | 5.695478 | 6.302334 | 1290.048 |
| 4.356604 | 6.042425 | 5.203993 | 5.811329 | 5.412556 | 5.019506 | 5.702274 | 1604.142 |
| 5.314691 | 5.278016 | 6.443996 | 6.004046 | 6.107471 | 5.846285 | 6.200381 | 1896.762 |
| 5.452448 | 5.386314 | 6.493446 | 6.149022 | 5.614233 | 5.754917 | 5.840112 | 714.0084 |
| 5.146821 | 5.574897 | 5.80355  | 5.649279 | 5.765705 | 4.499185 | 5.661682 | 640.722  |
| 4.981891 | 5.403605 | 6.451951 | 6.477388 | 6.142523 | 4.306899 | 6.218041 | 1145.405 |
| 4.927618 | 6.164354 | 6.513931 | 6.435246 | 6.02836  | 5.864995 | 6.102819 | 1174.608 |
| 4.151155 | 5.111166 | 4.578711 | 5.865973 | 5.285687 | 4.801723 | 5.308943 | 967.9207 |
| 5.305361 | 5.160569 | 5.86824  | 5.311904 | 5.543378 | 4.887424 | 5.565912 | 893.2045 |
| 5.738411 | 5.072991 | 5.480564 | 5.334224 | 5.415983 | 5.152536 | 5.81652  | 1112.648 |
| 5.120227 | 5.143595 | 5.804439 | 5.670348 | 5.964112 | 5.768507 | 5.06679  | 1142.666 |
| 5.278984 | 7.079722 | 5.497692 | 5.258465 | 5.174581 | 4.955535 | 5.666243 | 1097.118 |
| 4.663483 | 7.071958 | 5.840578 | 6.067174 | 5.531158 | 5.115269 | 5.966469 | 1085.802 |
| 4.91875  | 6.865875 | 5.799681 | 5.91363  | 5.474022 | 5.162147 | 6.080831 | 1662.161 |
| 5.372784 | 6.45777  | 6.344757 | 6.167988 | 6.007444 | 5.67674  | 5.967611 | 1781.106 |
| 6.031217 | 6.545407 | 5.304015 | 5.026141 | 5.682672 | 5.089628 | 4.95029  | 1077.667 |
| 4.942906 | 5.534817 | 6.727573 | 6.325109 | 6.439029 | 5.508868 | 5.841376 | 765.9553 |
| 5.421472 | 7.134222 | 5.534272 | 5.460051 | 5.869356 | 5.126471 | 5.827149 | 1428.76  |
| 4.616783 | 7.192027 | 6.690047 | 6.592492 | 6.353042 | 6.042425 | 6.265332 | 1685.427 |
| 5.86327  | 5.833172 | 5.809388 | 4.666621 | 5.873987 | 5.278016 | 5.218101 | 571.6613 |
| 5.710692 | 6.949081 | 5.311845 | 5.24593  | 6.040544 | 5.386314 | 5.125426 | 1821.215 |
| 4.861826 | 6.570485 | 6.068633 | 5.790722 | 5.727705 | 5.574897 | 5.506936 | 743.2767 |
| 4.664388 | 6.489374 | 6.06463  | 6.101139 | 5.707395 | 5.403605 | 5.990549 | 1234.369 |
| 4.616017 | 7.240866 | 6.368024 | 6.420882 | 5.81552  | 6.164354 | 6.313578 | 1212.762 |
| 5.354859 | 5.933915 | 6.596388 | 6.076836 | 5.541564 | 5.111166 | 5.797686 | 459.1549 |
| 5.365515 | 6.455638 | 5.517634 | 5.631283 | 6.169318 | 5.160569 | 5.698051 | 1753.129 |
| 4.319113 | 5.901263 | 5.983439 | 6.204639 | 5.367462 | 5.072991 | 5.826217 | 426.4734 |
| 5.079854 | 6.846748 | 5.423693 | 5.536168 | 4.905653 | 5.143595 | 5.807392 | 1462.163 |
| 5.152843 | 6.108363 | 6.524619 | 6.39567  | 5.854028 | 5.430517 | 6.228321 | 1607.319 |
| 5.926663 | 6.647522 | 5.592251 | 5.443869 | 4.901023 | 5.181519 | 5.443869 | 1300.102 |
| 5.361304 | 7.053274 | 5.847123 | 5.765159 | 5.792738 | 4.465115 | 5.734194 | 1732.468 |
| 5.043949 | 6.24646  | 6.492249 | 5.928339 | 5.959888 | 5.274835 | 5.961412 | 737.9405 |
| 3.704974 | 6.998426 | 5.118176 | 5.747692 | 4.823302 | 4.725981 | 5.407061 | 1688.072 |
| 4.981225 | 7.06214  | 5.582529 | 5.57642  | 5.414546 | 5.312782 | 5.826465 | 1635.929 |
| 5.247247 | 6.629375 | 6.683768 | 6.350198 | 5.965974 | 5.955217 | 6.213246 | 1268.666 |
| 5.136091 | 5.611267 | 6.376869 | 6.084473 | 6.048538 | 5.440979 | 5.882598 | 1111.869 |
| 5.595534 | 6.857118 | 6.665495 | 6.221715 | 5.879259 | 5.362682 | 5.986975 | 488.5264 |
| 4.81489  | 7.345441 | 6.280339 | 5.80495  | 5.698731 | 5.36912  | 6.102185 | 616.739  |
| 5.719452 | 6.775507 | 6.096707 | 5.105504 | 5.866157 | 4.54007  | 5.471899 | 620.5473 |
| 4.585792 | 6.217989 | 4.451743 | 5.09032  | 4.270319 | 4.270319 | 5.124882 | 818.23   |
| 5.596366 | 6.069223 | 6.487243 | 5.37795  | 5.665039 | 4.385964 | 6.012465 | 717.9866 |
| 5.139492 | 6.827556 | 6.545958 | 6.068377 | 6.170857 | 5.671615 | 5.936468 | 1091.601 |
| 5.080576 | 6.286909 | 6.339379 | 6.386888 | 5.861842 | 5.953862 | 5.719843 | 1194.365 |

|          |          |          |          |          |          |          |          |
|----------|----------|----------|----------|----------|----------|----------|----------|
| 5.211922 | 7.345441 | 6.591426 | 6.415611 | 6.067693 | 5.895508 | 5.907665 | 1311.994 |
| 4.395039 | 7.345441 | 5.045514 | 5.726163 | 5.927216 | 4.93828  | 4.871267 | 1519.747 |
| 5.6945   | 7.345441 | 5.807348 | 5.253436 | 5.883866 | 5.638706 | 5.912209 | 1916.005 |

**risk**

[illegible]





low  
low  
low
