# Supplementary material for: Immune-Related lncRNAs with WGCNA Identified the Function of SNHG10 in HBV-Related Hepatocellular Carcinoma
Source: Hindawi journal article supplement (doi:10.1155/2022/9332844), 2022-07-06
Supplement: f1 [file 9332844.f1.zip]

**Supplementary table 2: The clinical characteristics of these eligible patients**

| sampleID        | age_at_initial_pathologic_diagnosis | weight | gender |
|-----------------|-------------------------------------|--------|--------|
| TCGA-DD-AACX-01 | 66                                  | 53     | MALE   |
| TCGA-DD-AAD5-01 | 54                                  | 70     | MALE   |
| TCGA-DD-AADG-01 | 70                                  | 61     | MALE   |
| TCGA-DD-AADR-01 | 58                                  | 75     | MALE   |
| TCGA-DD-AAED-01 | 51                                  | 69     | MALE   |
| TCGA-UB-A7MC-01 | 59                                  | 78     | MALE   |
| TCGA-2Y-A9H4-01 | 68                                  | 61     | MALE   |
| TCGA-DD-AACW-01 | 43                                  | 65     | MALE   |
| TCGA-DD-AAD3-01 | 43                                  | 77     | MALE   |
| TCGA-DD-AADL-01 | 58                                  | 53     | MALE   |
| TCGA-DD-AADM-01 | 58                                  | 55     | MALE   |
| TCGA-DD-AADN-01 | 59                                  | 62     | MALE   |
| TCGA-DD-AADO-01 | 55                                  | 58     | MALE   |
| TCGA-DD-AADQ-01 | 59                                  | 64     | MALE   |
| TCGA-DD-AADV-01 | 50                                  | 64     | MALE   |
| TCGA-DD-AAE3-01 | 50                                  | 73     | MALE   |
| TCGA-DD-AAE7-01 | 72                                  | 74     | MALE   |
| TCGA-DD-AAE9-01 | 69                                  | 63     | MALE   |
| TCGA-DD-AAEA-01 | 65                                  | 66     | MALE   |
| TCGA-DD-AAEB-01 | 60                                  | 75     | MALE   |
| TCGA-2Y-A9GT-01 | 51                                  | 122    | MALE   |
| TCGA-2Y-A9H0-01 | 49                                  | 89     | MALE   |
| TCGA-08-A75V-01 | 54                                  | 92     | MALE   |
| TCGA-K7-A6G5-01 | 66                                  | 80     | MALE   |
| TCGA-DD-A116-01 | 68                                  | 73     | MALE   |
| TCGA-DD-A1EA-01 | 68                                  | 94     | MALE   |
| TCGA-DD-A1EH-01 | 23                                  | 70     | MALE   |
| TCGA-DD-A1EL-01 | 23                                  | 54     | MALE   |
| TCGA-DD-AACA-01 | 65                                  | 70     | MALE   |
| TCGA-DD-AACE-01 | 62                                  | 62     | MALE   |
| TCGA-DD-AACN-01 | 32                                  | 70     | MALE   |
| TCGA-DD-AACO-01 | 40                                  | 43     | MALE   |
| TCGA-DD-AACQ-01 | 50                                  | 64     | MALE   |
| TCGA-DD-AACY-01 | 61                                  | 62     | MALE   |
| TCGA-DD-AADO-01 | 73                                  | 54     | FEMALE |
| TCGA-DD-AAD6-01 | 66                                  | 93     | MALE   |
| TCGA-DD-AADW-01 | 48                                  | 49     | MALE   |
| TCGA-DD-AAE4-01 | 49                                  | 62     | FEMALE |
| TCGA-DD-AAEE-01 | 55                                  | 58     | MALE   |
| TCGA-DD-AAEI-01 | 72                                  | 79     | MALE   |
| TCGA-DD-AAVX-01 | 38                                  | 65     | MALE   |
| TCGA-G3-A25Y-01 | 52                                  | 57     | FEMALE |
| TCGA-G3-A3CH-01 | 53                                  | 74     | MALE   |
| TCGA-G3-AAV1-01 | 51                                  | 99     | MALE   |
| TCGA-QA-A7B7-01 | 48                                  | 108    | MALE   |
| TCGA-XR-A8TF-01 | 74                                  | 57     | MALE   |
| TCGA-DD-AAVP-01 | 48                                  | 62     | MALE   |
| TCGA-DD-AAVQ-01 | 38                                  | 72     | MALE   |
| TCGA-DD-AAVU-01 | 46                                  | 88     | MALE   |
| TCGA-BC-A10W-01 | 50                                  | 71     | MALE   |
| TCGA-BW-A5NP-01 | 26                                  |        | FEMALE |
| TCGA-CC-A9FU-01 | 52                                  | 48     | FEMALE |

|                 |    |           |
|-----------------|----|-----------|
| TCGA-DD-A119-01 | 40 | 58 MALE   |
| TCGA-DD-A1EI-01 | 46 | 69 MALE   |
| TCGA-DD-AAC8-01 | 72 | 57 MALE   |
| TCGA-DD-AAC9-01 | 51 | 81 MALE   |
| TCGA-DD-AACB-01 | 74 | 72 FEMALE |
| TCGA-DD-AACC-01 | 61 | 61 MALE   |
| TCGA-DD-AACD-01 | 48 | 66 MALE   |
| TCGA-DD-AACG-01 | 52 | 65 MALE   |
| TCGA-DD-AACH-01 | 69 | 53 MALE   |
| TCGA-DD-AACK-01 | 70 | 68 MALE   |
| TCGA-DD-AACS-01 | 39 | 80 MALE   |
| TCGA-DD-AACT-01 | 69 | 62 FEMALE |
| TCGA-DD-AACU-01 | 59 | 67 MALE   |
| TCGA-DD-AAD2-01 | 66 | 52 MALE   |
| TCGA-DD-AADA-01 | 66 | 59 FEMALE |
| TCGA-DD-AADB-01 | 51 | 68 MALE   |
| TCGA-DD-AADC-01 | 53 | 81 MALE   |
| TCGA-DD-AADD-01 | 51 | 68 MALE   |
| TCGA-DD-AADF-01 | 64 | 55 FEMALE |
| TCGA-DD-AADI-01 | 43 | 64 FEMALE |
| TCGA-DD-AADK-01 | 68 | 51 FEMALE |
| TCGA-DD-AADP-01 | 45 | 67 MALE   |
| TCGA-DD-AADY-01 | 55 | 55 FEMALE |
| TCGA-DD-AAEO-01 | 45 | 56 FEMALE |
| TCGA-DD-AAE1-01 | 52 | 62 MALE   |
| TCGA-DD-AAE2-01 | 51 | 82 MALE   |
| TCGA-DD-AAEK-01 | 51 | 64 MALE   |
| TCGA-DD-AAVR-01 | 44 | 69 MALE   |
| TCGA-DD-AAVS-01 | 56 | 72 MALE   |
| TCGA-DD-AAVV-01 | 56 | 71 MALE   |
| TCGA-DD-AAVW-01 | 35 | 62 MALE   |
| TCGA-DD-AAVZ-01 | 38 | 62 MALE   |
| TCGA-DD-AAW0-01 | 54 | 75 MALE   |
| TCGA-G3-A25U-01 | 63 | 47 FEMALE |
| TCGA-G3-A25X-01 | 73 | 65 MALE   |
| TCGA-G3-A25Z-01 | 58 | 69 MALE   |
| TCGA-G3-A3CK-01 | 61 | 67 MALE   |
| TCGA-G3-AAV0-01 | 58 | 58 MALE   |
| TCGA-G3-AAV4-01 | 83 | 56 FEMALE |
| TCGA-G3-AAV7-01 | 38 | 58 MALE   |
| TCGA-RC-A7S9-01 | 47 | 58 FEMALE |
| TCGA-RC-A7SB-01 | 53 | 61 MALE   |
| TCGA-RC-A7SH-01 | 42 | 68 MALE   |
| TCGA-UB-A7ME-01 | 51 | 75 MALE   |
| TCGA-ZP-A9CZ-01 | 72 | 73 MALE   |
| TCGA-5C-AAPD-01 | 61 | 69 MALE   |
| TCGA-XR-A8TC-01 | 43 | 52 FEMALE |
| TCGA-DD-AACA-02 | 65 | 70 MALE   |
| TCGA-DD-AAD1-01 | 51 | 44 FEMALE |
| TCGA-DD-AAD8-01 | 73 | 57 FEMALE |
| TCGA-UB-A7MF-01 | 56 | 95 MALE   |
| TCGA-G3-AAUZ-01 | 48 | 77 MALE   |
| TCGA-DD-A4NQ-01 | 60 | 75 MALE   |

tients.

| neoplasms_histologic_grade | pathologic_M | pathologic_N |
|----------------------------|--------------|--------------|
| G3                         | M0           | NO           |
| G3                         | MX           | NO           |
| G2                         | MX           | NO           |
| G3                         | M0           | NO           |
| G2                         | M0           | NO           |
| G4                         | M0           | NO           |
| G3                         | M0           | NO           |
| G4                         | MX           | NX           |
| G3                         | M0           | NO           |
| G3                         | M0           | NO           |
| G3                         | M0           | NO           |
| G2                         | M0           | NO           |
| G2                         | M0           | NO           |
| G3                         | M0           | NO           |
| G3                         | M0           | NO           |
| G2                         | M0           | NO           |
| G2                         | MX           | NX           |
| G1                         | M0           | NO           |
| G2                         | MX           | NX           |
| G2                         | MX           | NO           |
| G3                         | M0           | NO           |
| G2                         | M0           | NO           |
| G3                         | M0           | NO           |
| G2                         | M0           | NO           |
| G3                         | M0           | NO           |
| G3                         | M0           | NO           |
| G1                         | M0           | NO           |
| G4                         | M0           | NO           |
| G2                         | M0           | NO           |
| G2                         | M0           | NO           |
| G3                         | M0           | NO           |
| G2                         | M0           | NO           |
| G3                         | M0           | NO           |
| G2                         | MX           | NX           |
| G1                         | MX           | NX           |
| G1                         | M0           | NO           |
| G2                         | M0           | NO           |
| G2                         | M0           | NO           |
| G3                         | MX           | NX           |
| G3                         | M1           | NO           |
| G2                         | M0           | NO           |

|    |    |    |
|----|----|----|
| G3 | M1 | NO |
| G2 | MO | NO |
| G3 | MO | NO |
| G2 | MO | NO |
| G3 | MO | NO |
| G2 | MO | NO |
| G4 | MO | NO |
| G4 | MO | NO |
| G3 | MO | NO |
| G2 | MO | NO |
| G3 | MO | NO |
| G2 | MO | NO |
| G3 | MO | NO |
| G2 | MO | NO |
| G3 | MO | NO |
| G4 | MO | NO |
| G3 | MO | NO |
| G4 | MO | NO |
| G4 | MO | NO |
| G3 | MO | NO |
| G3 | MO | NO |
| G3 | MO | NO |
| G2 | MO | NO |
| G4 | MO | NO |
| G3 | MO | NO |
| G3 | MO | NO |
| G3 | MO | NO |
| G2 | MO | NO |
| G2 | MO | NO |
| G3 | MO | NO |
| G2 | MO | NO |
| G2 | MO | NO |
| G3 | MO | NO |
| G3 | MO | NO |
| G2 | MO | NO |
| G2 | MO | NO |
| G2 | MO | NO |
| G1 | MO | NO |
| G2 | MO | NO |
| G3 | MO | NO |
| G2 | MO | NO |
| G3 | MO | NO |
| G2 | MX | NX |
| G1 | MX | NX |
| G1 | MO | NO |
| G2 | MX | NX |
| G3 | MO | NO |
| G4 | MO | NO |
| G2 | MO | NO |
| G2 | MX | NX |
| G2 | MO | NO |
| G3 | MO | NO |

| pathologic_T | pathologic_stage | child_pugh_classification_grade |
|--------------|------------------|---------------------------------|
| T2           | Stage II         | A                               |
| T1           | Stage I          | A                               |
| T3a          | Stage IIIA       | A                               |
| T1           | Stage I          | A                               |
| T1           | Stage I          | A                               |
| T3a          | Stage IIIA       | A                               |
| T1           | Stage I          | A                               |
| T2           | Stage II         | A                               |
| T1           | Stage I          | A                               |
| T1           | Stage I          | A                               |
| T2           | Stage II         | A                               |
| T1           | Stage I          | C                               |
| T3           | Stage IIIA       |                                 |
| T1           | Stage I          | A                               |
| T1           | Stage I          |                                 |
| T3           | Stage IIIA       | A                               |
| T2           | Stage II         | A                               |
| T3           | Stage III        | B                               |
| T2           | Stage II         | A                               |
| T1           | Stage I          | A                               |
| T2           | Stage II         | A                               |
| T1           | Stage I          | A                               |
| T1           | Stage I          | A                               |
| T3a          | Stage IIIA       | A                               |
| T1           | Stage I          | A                               |
| T2           | Stage II         | A                               |
| T1           | Stage I          | A                               |
| T3a          | Stage IIIA       | A                               |
| T4           | Stage IIIC       | B                               |
| T2           | Stage II         | A                               |
| T1           | Stage I          | A                               |
| T1           | Stage I          | A                               |
| T1           | Stage I          | A                               |
| T2           | Stage II         | A                               |
| T4           |                  |                                 |
| T2           | Stage IV         |                                 |
| T3a          | Stage IIIA       |                                 |

|     |            |   |
|-----|------------|---|
| T3a | Stage IV   | A |
| T1  | Stage I    | B |
| T1  | Stage I    | A |
| T2  | Stage II   | A |
| T2  | Stage II   | A |
| T1  | Stage I    | A |
| T2  | Stage II   | A |
| T1  | Stage I    | A |
| T1  | Stage I    | A |
| T3a | Stage IIIA | A |
| T1  | Stage I    | A |
| T1  | Stage I    | A |
| T2  | Stage II   | A |
| T1  | Stage I    | A |
| T1  | Stage I    | A |
| T2  | Stage II   | A |
| T1  | Stage I    | A |
| T2  | Stage II   | A |
| T1  | Stage I    | A |
| T2  | Stage II   | A |
| T1  | Stage I    | A |
| T2  | Stage II   | B |
| T2  | Stage II   | A |
| T1  | Stage I    | B |
| T1  |            | A |
| T2  | Stage II   | A |
| T1  | Stage I    | A |
| T3a | Stage IIIA | A |
| T1  | Stage I    | A |
| T2  | Stage II   | A |

| cancer_status | adjacent_hepatic_tissue_inflammation_extent_type |
|---------------|--------------------------------------------------|
| WITH TUMOR    | Mild                                             |
| WITH TUMOR    | Mild                                             |
| TUMOR FREE    | Mild                                             |
| TUMOR FREE    | Mild                                             |
| WITH TUMOR    | Mild                                             |
| WITH TUMOR    | Mild                                             |
| TUMOR FREE    |                                                  |
| TUMOR FREE    |                                                  |
| TUMOR FREE    | Mild                                             |
| TUMOR FREE    |                                                  |
| TUMOR FREE    | None                                             |
| TUMOR FREE    | None                                             |
| TUMOR FREE    | Severe                                           |
| TUMOR FREE    | Mild                                             |
| TUMOR FREE    |                                                  |
| TUMOR FREE    |                                                  |
| WITH TUMOR    | None                                             |
| TUMOR FREE    | None                                             |
| TUMOR FREE    | Mild                                             |
| TUMOR FREE    |                                                  |
| TUMOR FREE    |                                                  |
| WITH TUMOR    | Mild                                             |
| WITH TUMOR    | None                                             |
| WITH TUMOR    | Mild                                             |
| WITH TUMOR    | Mild                                             |
| TUMOR FREE    | Mild                                             |
| WITH TUMOR    |                                                  |
| WITH TUMOR    | Mild                                             |
| WITH TUMOR    | Mild                                             |
| WITH TUMOR    |                                                  |
| TUMOR FREE    | None                                             |
| TUMOR FREE    | None                                             |
| WITH TUMOR    | None                                             |
| WITH TUMOR    | None                                             |
| WITH TUMOR    | Severe                                           |
| WITH TUMOR    | Mild                                             |
| WITH TUMOR    | Severe                                           |
| WITH TUMOR    | Severe                                           |
| WITH TUMOR    | Mild                                             |
| TUMOR FREE    | None                                             |
| TUMOR FREE    | Severe                                           |
| TUMOR FREE    | Severe                                           |
| TUMOR FREE    | Mild                                             |
| WITH TUMOR    |                                                  |
| WITH TUMOR    | Mild                                             |
| TUMOR FREE    |                                                  |

|            |        |
|------------|--------|
|            | None   |
| TUMOR FREE | Mild   |
| WITH TUMOR | Mild   |
| WITH TUMOR | Mild   |
| WITH TUMOR | Mild   |
| TUMOR FREE | Mild   |
| TUMOR FREE | None   |
| TUMOR FREE |        |
| TUMOR FREE | Mild   |
| TUMOR FREE |        |
| TUMOR FREE | Mild   |
| TUMOR FREE |        |
| WITH TUMOR |        |
| TUMOR FREE | None   |
| TUMOR FREE |        |
| TUMOR FREE | None   |
| TUMOR FREE | Mild   |
| TUMOR FREE | Mild   |
| TUMOR FREE | Mild   |
| TUMOR FREE | None   |
| TUMOR FREE | Mild   |
| TUMOR FREE | None   |
| TUMOR FREE |        |
| TUMOR FREE | Mild   |
| TUMOR FREE | Mild   |
| TUMOR FREE | None   |
| WITH TUMOR | None   |
| TUMOR FREE | Mild   |
| TUMOR FREE |        |
| TUMOR FREE | None   |
| WITH TUMOR | Mild   |
| WITH TUMOR | Mild   |
| WITH TUMOR |        |
| TUMOR FREE | Mild   |
| WITH TUMOR |        |
| TUMOR FREE | Severe |
| WITH TUMOR | Mild   |



| platelet_result_count | prothrombin_time_result_value | albumin_result_specified_value |
|-----------------------|-------------------------------|--------------------------------|
| 179                   | 0.9                           | 4.2                            |
| 349                   | 1.2                           | 3.7                            |
| 170                   | 1                             | 4.2                            |
| 75                    | 1.1                           | 4.4                            |
| 211                   | 1.1                           | 4                              |
| 200                   | 0.9                           | 3.9                            |
| 223                   | 11                            | 4.6                            |
| 137                   | 1.1                           | 4                              |
| 181                   | 1                             | 3.9                            |
| 204                   | 0.9                           | 3.5                            |
| 126                   | 1                             | 4.1                            |
| 176                   | 1.1                           | 3.5                            |
| 180                   | 1                             | 4.5                            |
| 163                   | 1.1                           | 4.4                            |
| 187                   | 1                             | 3.8                            |
| 180                   | 1.1                           | 4.7                            |
| 188                   | 1                             | 4.7                            |
| 138                   | 1.1                           | 4.1                            |
| 255                   | 1                             | 4.5                            |
| 270                   | 1                             | 4.1                            |
| 187                   | 9.8                           | 3.7                            |
| 207                   | 12.2                          | 2                              |
| 211                   | 9.1                           | 3.8                            |
| 157                   | 1                             | 4.1                            |
| 209                   | 10.2                          | 3.3                            |
| 212                   | 10.4                          | 4.7                            |
| 153                   | 10.8                          | 4.4                            |
| 136                   | 0.9                           | 3.7                            |
| 175                   | 0.9                           | 4.4                            |
| 185                   | 1                             | 3.9                            |
| 88                    | 1                             | 3.7                            |
| 157                   | 1                             | 4.2                            |
| 114                   | 1.1                           | 3.1                            |
| 86                    | 1                             | 3.4                            |
| 185                   | 1                             | 2.7                            |
| 102                   | 1                             | 4.3                            |
| 113                   | 1.1                           | 4                              |
| 221                   | 1                             | 4.7                            |
| 161                   | 1.1                           | 3.6                            |
| 186                   | 1                             | 3.9                            |
| 166                   | 1.1                           | 0.4                            |
| 142                   | 1.2                           | 0.3                            |
| 115                   | 1.2                           | 3.2                            |
| 218                   | 11.5                          | 4.2                            |
| 194000                | 1.1                           | 3.9                            |
| 189                   | 1                             | 4.3                            |
| 128                   | 1.2                           | 3                              |
| 166                   | 1                             | 4.6                            |
| 401                   | 0.9                           | 2.8                            |

|        |      |     |
|--------|------|-----|
| 572    | 1    | 3.9 |
| 148    | 10.9 | 5.1 |
| 177    | 0.9  | 4.3 |
| 149    | 0.9  | 4.2 |
| 179    | 0.8  | 4.1 |
| 208    | 1    | 3.9 |
| 268    | 6.9  | 3.9 |
| 196    | 0.9  | 3.6 |
| 290    | 0.9  | 4.3 |
| 98     | 0.9  | 4.6 |
| 223    | 1    | 4.3 |
| 213    | 1    | 4.4 |
| 166    | 0.9  | 4.4 |
| 172    | 1    | 3.5 |
| 173    | 1.1  | 4.1 |
| 180    | 1    | 4.5 |
| 212    | 1.2  | 3.8 |
| 299    | 1.1  | 4.1 |
| 174    | 1.2  | 3.5 |
| 141    | 1.1  | 3.8 |
| 197    | 1    | 4.4 |
| 102    | 1.1  | 3.7 |
| 159    | 1.3  | 3.5 |
| 226    | 0.9  | 4.8 |
| 102    | 0.9  | 4.1 |
| 238    | 1    | 4.4 |
| 202    | 1    | 4.1 |
| 174    | 1    | 3.6 |
| 281    | 1.1  | 3   |
| 244    | 1.1  | 4.6 |
| 212    | 1    | 4.6 |
| 98     | 1.2  | 3.8 |
| 183    | 1    | 4.6 |
| 113    | 1    | 0.3 |
| 102    | 1    | 0.4 |
| 115    | 1    | 0.4 |
| 143    | 1    | 0.2 |
| 193    | 0.9  | 4.2 |
| 79     | 1.2  | 2.7 |
| 179    | 1    | 4   |
| 178000 | 1.1  | 4.3 |
| 196000 | 1    | 4.8 |
| 225    | 1    | 4.1 |
| 181    | 1    | 4.2 |
|        | 11.5 | 4.4 |
| 318000 | 1    | 3.9 |
| 136    | 0.9  | 3.7 |
| 157    | 0.9  | 4.5 |
| 130    | 1.1  | 4.3 |
| 130    | 1    | 3.6 |
| 214    | 1    | 3.8 |
| 283    | 10.1 | 4.4 |

| fetoprotein_outcome_value | fibrosis_ishak_score           | relative_family_cancer_history |
|---------------------------|--------------------------------|--------------------------------|
|                           | 3 3,4 - Fibrous Speta          | NO                             |
|                           | 73 3,4 - Fibrous Speta         | NO                             |
|                           | 2256 3,4 - Fibrous Speta       | NO                             |
|                           | 3 6 - Established Cirrhosis    | NO                             |
|                           | 2405 1,2 - Portal Fibrosis     | NO                             |
|                           | 126 1,2 - Portal Fibrosis      | NO                             |
|                           | 11                             | YES                            |
|                           | 1726                           | NO                             |
|                           | 1,2 - Portal Fibrosis          | NO                             |
|                           | 14                             | YES                            |
|                           | 112                            | NO                             |
|                           | 151367                         | NO                             |
|                           | 176037                         | NO                             |
|                           | 7                              | NO                             |
|                           | 11 6 - Established Cirrhosis   | NO                             |
|                           | 2 1,2 - Portal Fibrosis        | NO                             |
|                           | 1 3,4 - Fibrous Speta          | NO                             |
|                           | 3 1,2 - Portal Fibrosis        | NO                             |
|                           | 2 1,2 - Portal Fibrosis        | NO                             |
|                           | 1                              | NO                             |
|                           | 17                             | YES                            |
|                           | 7598                           |                                |
|                           | 7 6 - Established Cirrhosis    | YES                            |
|                           | 24 3,4 - Fibrous Speta         | NO                             |
|                           | 3 1,2 - Portal Fibrosis        | YES                            |
|                           | 94340 3,4 - Fibrous Speta      | YES                            |
|                           | 5 0 - No Fibrosis              | NO                             |
|                           | 7 6 - Established Cirrhosis    | NO                             |
|                           | 2 6 - Established Cirrhosis    | NO                             |
|                           | 699                            | NO                             |
|                           | 5 6 - Established Cirrhosis    | NO                             |
|                           | 7                              | NO                             |
|                           | 290 3,4 - Fibrous Speta        | NO                             |
|                           | 4                              | NO                             |
|                           |                                | NO                             |
|                           | 250 6 - Established Cirrhosis  | NO                             |
|                           | 7 6 - Established Cirrhosis    | NO                             |
|                           | 3 6 - Established Cirrhosis    | NO                             |
|                           | 24 6 - Established Cirrhosis   | NO                             |
|                           | 1 6 - Established Cirrhosis    | YES                            |
|                           | 35 3,4 - Fibrous Speta         | NO                             |
|                           | 41 6 - Established Cirrhosis   | NO                             |
|                           | 8 6 - Established Cirrhosis    |                                |
|                           | 1751 0 - No Fibrosis           | NO                             |
|                           | 39 3,4 - Fibrous Speta         | NO                             |
|                           | 2 6 - Established Cirrhosis    | YES                            |
|                           | 1456 6 - Established Cirrhosis | NO                             |
|                           | 2 3,4 - Fibrous Speta          | NO                             |
|                           | 79                             | YES                            |
|                           | 143684 3,4 - Fibrous Speta     |                                |
|                           |                                | NO                             |

|                                 |                      |
|---------------------------------|----------------------|
| 1836 0 - No Fibrosis            | YES                  |
| 24 6 - Established Cirrhosis    | NO                   |
| 1 1,2 - Portal Fibrosis         | NO                   |
| 5 6 - Established Cirrhosis     | NO                   |
| 1902 6 - Established Cirrhosis  | NO                   |
| 24 6 - Established Cirrhosis    | NO                   |
| 2 1,2 - Portal Fibrosis         | YES                  |
| 11718 6 - Established Cirrhosis | NO                   |
| 7 6 - Established Cirrhosis     | NO                   |
| 5 6 - Established Cirrhosis     | NO                   |
| 1                               | NO                   |
| 4                               | NO                   |
| 22                              | NO                   |
| 25 1,2 - Portal Fibrosis        | NO                   |
| 8698                            | NO                   |
| 419                             | NO                   |
| 36                              | NO                   |
| 9804                            | NO                   |
| 725                             | NO                   |
| 27                              | NO                   |
| 236 6 - Established Cirrhosis   | NO                   |
| 9                               | NO                   |
| 9 6 - Established Cirrhosis     | NO                   |
| 8751 3,4 - Fibrous Speta        | NO                   |
| 2693 6 - Established Cirrhosis  | NO                   |
| 41 6 - Established Cirrhosis    | NO                   |
| 5166 6 - Established Cirrhosis  | NO                   |
| 36 6 - Established Cirrhosis    | YES                  |
| 50149 3,4 - Fibrous Speta       | NO                   |
| 7 3,4 - Fibrous Speta           | NO                   |
| 927 6 - Established Cirrhosis   | NO                   |
| 945 6 - Established Cirrhosis   | YES                  |
| 3 3,4 - Fibrous Speta           | YES                  |
| 10 0 - No Fibrosis              | NO                   |
| 11 1,2 - Portal Fibrosis        | NO                   |
| 44 5 - Nodular Formation and LI | YES                  |
| 3 6 - Established Cirrhosis     | YES                  |
| 4 0 - No Fibrosis               |                      |
| 4 3,4 - Fibrous Speta           | YES                  |
| 3 5 - Nodular Formation and     | Incomplete Cirrhosis |
| 10 6 - Established Cirrhosis    |                      |
| 3 0 - No Fibrosis               |                      |
| 2466 3,4 - Fibrous Speta        |                      |
| 1388 1,2 - Portal Fibrosis      | NO                   |
| 8 3,4 - Fibrous Speta           | YES                  |
|                                 | NO                   |
| 47 6 - Established Cirrhosis    | NO                   |
| 7 6 - Established Cirrhosis     | NO                   |
| 451                             | NO                   |
| 4 1,2 - Portal Fibrosis         | NO                   |
| 2505 6 - Established Cirrhosis  | YES                  |
| 3 1,2 - Portal Fibrosis         |                      |
| 141                             | YES                  |

vascular infiltration

- None
- None
- None
- None
- None
- Micro
- None
- None
- None
- Micro
- None
- Micro
- Micro
- None

- None
- None

- Micro
- Macro
- None
- Micro
- None
- None
- Micro
- Micro
- None
- None
- None
- Micro

- Micro

[illegible]
