# Supplementary material for: Immune-Related lncRNAs with WGCNA Identified the Function of SNHG10 in HBV-Related Hepatocellular Carcinoma
Source: Hindawi journal article supplement (doi:10.1155/2022/9332844), 2022-07-06
Supplement: f1 [file 9332844.f1.zip]

Supplementary table 3: List of immune related genes in the co-ex  
List of genes in the co-expression magenta module

CLEC4M  
IFI30  
PROCR  
ADRM1  
KIAA0368  
TRPC4AP  
CD209  
UBXN1  
ERAP1  
TAPBPL  
KIR2DL5A  
ERAP2  
ULBP3  
ULBP2  
ULBP1  
KIR3DL3  
RAET1E  
RAET1L  
UBR1  
RAET1G  
PDIA2  
CD79A  
CD79B  
LYN  
SYK  
BTK  
BLNK  
VAV3  
VAV1  
VAV2  
RAC1  
RAC2  
RAC3  
PPP3CA  
PPP3CB  
PPP3CC  
CHP  
PPP3R1  
PPP3R2  
CHP2  
NFAT5  
NFATC1  
NFATC2  
NFATC3  
NFATC4  
HRAS  
KRAS  
NRAS  
FOS  
JUN  
CARD11  
BCL10

MALT1  
CHUK  
IKBKB  
IKBKG  
NFKB1  
RELA  
NFKBIA  
NFKBIB  
NFKBIE  
CD81  
CD19  
CR2  
PIK3R5  
PIK3R1  
PIK3R2  
PIK3R3  
PIK3CA  
PIK3CB















pression modules.

List of genes in the co-expression red module

ACKR2  
ACKR4  
ADGRE5  
AIM2  
ANXA11  
APLN  
APOA1  
APOA2  
APOA4  
APOBEC3F  
APOBEC3G  
AQP9  
ARHGDIB  
ATP6VOA2  
BCAR1  
BCL10  
BCL2  
BLNK  
BNIP3  
BNIP3L  
BST1  
BST2  
C1QBP  
C2  
C5AR1  
CADM1  
CCL18  
CCL19  
CCL2  
CCL20  
CCL21  
CCL22  
CCL23  
CCL24  
CCL25  
CCL26  
CCL27  
CCL4  
CCL5  
CCR1  
CCR2  
CCR4  
CCR5  
CCR6  
CCR8  
CCR9  
CD164  
CD1D  
CD22  
CD274  
CD28  
CD40LG

CD7  
CD74  
CD79A  
CD79B  
CD83  
CD86  
CD96  
CEACAM8  
CEBPB  
CEBPG  
CFHR1  
CHST4  
RPS19  
TRAF6  
DEFB1  
CMKLR1  
TARBP2  
IL18BP  
WAS  
CCL25  
TCF7  
FCGR3B  
APOBEC3G  
CTLA4  
IL16  
TCF12  
ARHGDIB  
IL18  
CD24  
LCP2  
CKLF  
CCL4  
AQP9  
APOA4  
IL2RG  
LST1  
HCLS1  
KMT2A  
CD3E  
CD79B  
SIRPG  
PTAFR  
FCN1  
CCR5  
MAFB  
NCOA6  
IFI16  
SPI1  
CIITA  
CTSW  
IGSF6  
LY86  
EBI3  
LCK

LTF  
CCL26  
CD2  
GTPBP1  
CD79A  
HELLS  
CXCL13  
NCF4  
SLA2  
CST7  
LILRB2  
MAP4K1  
CD96  
NFAM1  
CCL5  
GZMA  
SIT1  
ITGB2  
SP2  
ZAP70  
CD86  
CTSE  
CD3D  
S1PR4  
IL15  
IL16  
IL17A  
IL17B  
IL18  
IL18BP  
IL1R2  
IL2  
IL27  
IL27RA  
IL2RA  
IL2RG  
IL32  
IL4  
IL4R  
IL6  
IL6R  
IL6ST  
IL7  
IL7R  
IRF8  
KIR2DL1  
KIR2DL3  
KRT1  
LAT  
LAT2  
LAX1  
LCP2  
LILRB2  
LTB4R

LTF  
LY75  
LY86  
MADCAM1  
MALT1  
MAP3K7  
MAP4K2  
MBL2  
MBP  
MNX1  
MR1  
MS4A1  
MS4A2  
NCF4  
NCR1  
NFAM1  
NFIL3  
OPRD1  
OPRK1  
PAX5  
PDCD1  
POU2AF1  
POU2F2  
PRELID1  
PRKRA  
PSMB10  
PTAFR  
PTGDR2  
PTGER4  
PTPRC  
PYDC1  
RAG1  
RFX1  
RGS1  
RSAD2  
S1PR4  
SECTM1  
SEMA3C  
SEMA4D  
SEMA7A  
SFTPD  
SKAP1  
SLA2  
SOCS5  
SP2  
SPINK5  
ST6GAL1  
TAPBP  
TARBP2  
TCF12  
TCF7  
TENM1  
TGFB1  
TGFB2

THY1  
TLR7  
TLR8  
TNFAIP1  
TNFRSF14  
TNFRSF4  
TNFSF13  
TRAF2  
TRAF6  
TRAT1  
TREM1  
TREM2  
TRIM22  
UBE2N  
VIPR1  
VTN  
WAS  
XBP1  
YTHDF2  
ZAP70  
ZEB1  
BLM  
KCNC1  
HIST1H2AL  
PTTG2  
UGT3A2  
LOC399815  
HIST1H3C  
RAET1K  
RRH  
NCRNA00189  
SH2D6  
HIST1H1B  
DMC1  
RIBC2  
C5orf47  
HIST1H2B0  
LOC127841  
LOC339674  
FER1L4  
HIST1H4C  
MYLK2  
NUP62CL  
PTTG3P  
C2orf48  
IGF2BP3  
DPY19L2P2  
RACGAP1P  
MYB  
WDR93  
DHRS2  
RDM1  
TP73  
CLSPN

FAM40B  
NEIL3  
CFHR3  
NEB  
E2F7  
GPR19  
HIF3A  
ZNF404  
CENPI  
FANCB  
ACBD7  
CFHR4  
DUSP9  
KIF15  
XRCC2  
MTCP1  
RAD54L  
TTC26  
MCM10  
KIF18A  
CCNE1  
CENPK  
ITPKA  
ERCC6L  
BFSP1  
C15orf42  
SGOL1  
PRTFDC1  
TNFRSF11A  
FAM54A  
C1orf135  
CDCA2  
GSG2  
PSMC3IP  
POLQ  
KIAA1524  
PIF1  
ORC1L  
GALNTL2  
ABCA9  
ESCO2  
SPIN4  
SPAG8  
E2F8  
BLM







| List of genes in the co-expression black modu | List of genes in the co-expression brown |
|-----------------------------------------------|------------------------------------------|
| AKT3                                          | IL16                                     |
| AKT1                                          | IL17A                                    |
| AKT2                                          | IL17B                                    |
| GSK3B                                         | IL17C                                    |
| INPP5D                                        | IL17D                                    |
| CD22                                          | IL17F                                    |
| CD72                                          | IL18                                     |
| PTPN6                                         | IL19                                     |
| LILRB3                                        | IL1A                                     |
| FCGR2B                                        | IL1B                                     |
| RASGRP3                                       | IL1F10                                   |
| PLCG2                                         | IL1F5                                    |
| PRKCB                                         | IL1F6                                    |
| IFITM1                                        | IL1F7                                    |
| IGHA1                                         | IL1F8                                    |
| IGHA2                                         | IL1F9                                    |
| IGHD                                          | IL1RN                                    |
| IGHE                                          | IL2                                      |
| IGHG1                                         | IL20                                     |
| IGHG2                                         | IL21                                     |
| IGHG3                                         | IL22                                     |
| IGHG4                                         | IL23A                                    |
| IGHM                                          | IL24                                     |
| IGHV2-70                                      | IL25                                     |
| IGHV3-23                                      | IL26                                     |
| IGKC                                          | IL27                                     |
| IGKV1-5                                       | IL28A                                    |
| IGKV2-40                                      | IL28B                                    |
| IGKV3-20                                      | IL29                                     |
| IGKV3D-11                                     | IL3                                      |
| IGKV3D-20                                     | IL31                                     |
| IGKV4-1                                       | IL32                                     |
| IGLC3                                         | IL33                                     |
| IGLV7-43                                      | IL34                                     |
| C3                                            | IL4                                      |
| C5                                            | IL5                                      |
| CAMP                                          | IL6                                      |
| CCL1                                          | IL6ST                                    |
| CCL11                                         | IL7                                      |
| CCL13                                         | IL8                                      |
| CCL14                                         | IL9                                      |
| CCL15                                         | INH A                                    |
| CCL16                                         | INHBA                                    |
| CCL17                                         | INHBB                                    |
| CCL18                                         | INHBC                                    |
| CCL19                                         | INHBE                                    |
| CCL2                                          | INS                                      |
| CCL20                                         | INSL3                                    |
| CCL21                                         | INSL4                                    |
| CCL22                                         | INSL5                                    |
| CCL23                                         | INSL6                                    |
| CCL24                                         | JAG1                                     |

CCL25  
CCL26  
CCL27  
CCL28  
CCL3  
CCL3L3  
CCL4  
CCL4L1  
CCL5  
CCL7  
CCL8  
CKLF  
CMA1  
CTSG  
CX3CL1  
CXCL1  
CXCL10  
CXCL11  
CXCL12  
CXCL13  
CXCL14  
CXCL16  
CXCL17  
CXCL2  
CXCL3  
CXCL5  
CXCL6  
CXCL9  
CYR61  
DEFA1  
DEFA3  
DEFA5  
DEFB1  
DEFB104A  
DEFB4  
EDN1  
EDN2  
EDN3  
FGF10  
FGF2  
HTN3  
IL8  
LECT2  
PF4  
PF4V1  
PLAU  
PPBP  
PROK2

JAG2  
KGFLP1  
KGFLP2  
KITLG  
KL  
LACRT  
LECT2  
LEFTY1  
LEFTY2  
LEP  
LHB















# List of genes in the co-expression blue module

CTNND2  
DLK1  
SLC6A11  
HEPN1  
TUBBP5  
OXT  
FER1L6  
MYH4  
TRIM71  
IGFBPL1  
B4GALNT2  
MCCD1  
LOC146336  
C9orf122  
DIO3  
HS6ST2  
CCDC64B  
PRAME  
ESRP1  
PRSS16  
LOC284749  
SCGB2A1  
LYPD6B  
TRHDE  
SFRP5  
TRPV6  
HOXC9  
TNNT1  
PDX1  
GDF10  
DQX1  
B4GALNT4  
GPRIN2  
KISS1R  
KCNS1  
LRRC26  
CKMT1A  
STK33  
OVOL2  
FAM169B  
FIBCD1  
HOXC6  
HMGA2  
FAM83F  
C4orf6  
PNCK  
KCNK15  
ATP10B  
IL20RA  
SLC6A19  
OVOL1  
LOC285629

GABRB3  
DMBT1  
CLDN18  
MAP7D2  
ACIN1  
ACKR2  
ACKR4  
ACVR1B  
ACVR2A  
ADGRE5  
AIM2  
AIMP1  
AKT1  
ALAS2  
ANXA11  
APLN  
APOA1  
APOA2  
APOA4  
APOBEC3F  
APOBEC3G  
AQP9  
ARHGDIB  
ATP6VOA2  
AZU1  
BCAR1  
BCL10  
BCL2  
BLNK  
BNIP3  
BNIP3L  
BST1  
BST2  
C1QBP  
C2  
C5AR1  
CADM1  
CALCA  
CARTPT  
CCL18  
CCL19  
CCL2  
CCL20  
CCL21  
CCL22  
CCL23  
CCL24  
CCL25  
CCL26  
CCL27  
CCL4  
CCL5  
CCR1  
CCR2

CCR4  
CCR5  
CCR6  
CCR8  
CCR9  
CD164  
CD1D  
CD2  
CD22  
CD24  
CD274  
CD276  
CD28  
CD34  
CD3D  
CD3E  
CD4  
CD40LG  
CD47  
CD7  
CD74  
CD79A  
CD79B  
CD83  
CD86  
CD96  
CDC42  
CDK6  
CEACAM8  
CEBPB  
CEBPG  
CFHR1  
CHST4  
CHUK  
CIITA  
CKLF  
CLEC7A  
CMKLR1  
CNIH1  
CNR2  
COLEC12  
CRHR1  
CRTAM  
CSF1  
CST7  
CTLA4  
CTSC  
CTSE  
CTSG  
CTSS  
CTSW  
CX3CL1  
CXCL12  
CXCL13

CXCL8  
CXCR2  
CXCR4  
DCSTAMP  
DEFA1  
DEFB1  
DEFB103A  
DEFB118  
DEFB127  
DEFB4A  
DMBT1  
DOCK2  
DPP4  
DPP8  
DYRK3  
EBI3  
ELF4  
ELP1  
ERAP2  
EREG  
ETS1  
FCAR  
FCGR1A  
FCGR2B  
FCGR3A  
FCGR3B  
FCGRT  
FCN1  
FCN2  
FOXO3  
FOXP3  
FTH1  
FYB1  
FYN  
GBP2  
GEM  
GLMN  
GPI  
GPR183  
GPR65  
GTPBP1  
GZMA  
HAMP  
HCLS1  
HDAC4  
HDAC5  
HDAC7  
HDAC9  
HELLS  
HLA-DRB3  
HRH2  
ICOSLG  
IFI16  
IFI6

IFITM2  
IFITM3  
IFNK  
IFNL1  
IFNLR1  
IGSF6  
IK  
IKBKG  
IL10  
IL10RB  
IL12A  
IL12B  
IL15  
IL16  
IL17A  
IL17B  
IL18  
IL18BP  
IL1R2  
IL2  
IL21  
IL27  
IL27RA  
IL2RA  
IL2RG  
IL31RA  
IL32  
IL4  
IL4R  
IL6  
IL6R  
IL6ST  
IL7  
IL7R  
INHA  
INHBA  
INS  
IRF8  
ITGB2  
JAG2  
KAT6A  
KAT8  
KIR2DL1  
KIR2DL3  
KIRREL3  
KMT2A  
KRT1  
LAT  
LAT2  
LAX1  
LCK  
LCP2  
LDB1  
LIG1

LIG3  
LILRB2  
LRMP  
LST1  
LTB4R  
LTF  
LY75  
LY86  
LYN  
MADCAM1  
MAFB  
MAL  
MALT1  
MAP3K7  
MAP4K1  
MAP4K2  
MBL2  
MBP  
MIA3  
MLF1  
MMP9  
MNX1  
MR1  
MS4A1  
MS4A2  
MYH9  
NCF4  
NCK1  
NCK2  
NCOA6  
NCR1  
NFAM1  
NFIL3  
NHEJ1  
NLRC3  
NOTCH2  
NOTCH4  
OPRD1  
OPRK1  
PAX5  
PDCD1  
PF4  
POU2AF1  
POU2F2  
PRELID1  
PREX1  
PRG3  
PRKRA  
PRL  
PSMB10  
PTAFR  
PTGDR2  
PTGER4  
PTPRC

PYDC1  
RAB3D  
RAG1  
RASGRP4  
RFX1  
RGS1  
RPS19  
RSAD2  
RUNX1  
S1PR4  
SAA1  
SART1  
SCG2  
SCIN  
SECTM1  
SEMA3C  
SEMA4D  
SEMA7A  
SFTPD  
SIRPG  
SIT1  
SKAP1  
SLA2  
SNRK  
SOCS5  
SOD1  
SP2  
SPACA3  
SPI1  
SPINK5  
ST6GAL1  
SYK  
TAPBP  
TARBP2  
TAZ  
TBX1  
TCF12  
TCF7  
TENM1  
TGFB1  
TGFB2  
THY1  
TLR4  
TLR7  
TLR8  
TNFAIP1  
TNFRSF14  
TNFRSF4  
TNFSF13  
TPD52  
TRAF2  
TRAF6  
TRAT1  
TREM1

TREM2  
TRIM22  
UBE2N  
VIPR1  
VTN  
WAS  
XBP1  
YTHDF2  
ZAP70  
ZBTB16  
ZEB1  
ZNF675



## List of genes in the co-expression turquoise module

MAP2K1  
MAP2K2  
MAPK1  
MAPK3  
TNF  
CSF2  
IFNG  
KIR2DS1  
KIR2DS3  
KIR2DS4  
KIR2DS5  
NCR2  
TYROBP  
LCK  
FCGR3A  
FCGR3B  
NCR1  
NCR3  
FCER1G  
CD247  
ZAP70  
SYK  
LCP2  
LAT  
PLCG1  
PLCG2  
SH3BP2  
PIK3CA  
PIK3CB  
PIK3CD  
PIK3CG  
PIK3R5  
PIK3R1  
PIK3R2  
PIK3R3  
FYN  
SHC2  
SHC4  
SHC3  
SHC1  
GRB2  
SOS1  
SOS2  
HRAS  
KRAS  
NRAS  
ARAF  
BRAF  
RAF1  
MICA  
MICB  
ULBP3

ULBP2  
ULBP1  
KLRK1  
HCST  
CD48  
CD244  
PPP3CA  
PPP3CB  
PPP3CC  
CHP  
PPP3R1  
PPP3R2  
CHP2  
NFAT5  
NFATC1  
NFATC2  
NFATC3  
NFATC4  
PRKCA  
PRKCB  
PRKCG  
SH2D1B  
SH2D1A  
IFNGR1  
IFNGR2  
IFNA2  
IFNA4  
IFNA5  
IFNA6  
IFNA7  
IFNA8  
IFNA10  
IFNA13  
IFNA14  
IFNA16  
IFNA17  
IFNA21  
IFNB1  
IFNAR1  
IFNAR2  
TNFSF10  
TNFRSF10D  
TNFRSF10C  
TNFRSF10B  
TNFRSF10A  
FASLG  
FAS  
GZMB  
PRF1  
CASP3  
BID  
CD3D  
CD3E  
CD3G

CD247  
CD4  
CD8A  
CD8B  
PTPRC  
LCK  
FYN  
ZAP70  
LCP2  
LAT  
ITK  
TEC  
NCK1  
NCK2  
VAV3  
VAV1  
VAV2  
GRAP2  
GRB2  
PAK1  
PAK2  
PAK3  
PAK4  
PAK6  
PAK7  
RHOA  
CDC42  
PPP3CA  
PPP3CB  
PPP3CC  
CHP  
PPP3R1  
PPP3R2  
CHP2  
NFAT5  
NFATC1  
NFATC2  
NFATC3  
NFATC4  
SOS1  
SOS2  
HRAS  
KRAS  
NRAS  
FOS  
JUN  
CARD11  
BCL10  
MALT1  
CHUK  
IKBKB  
IKBKG  
NFKB1  
RELA

NFKB1A











## List of genes in the co-expression yellow module

NFKB1B  
NFKB1E  
CD28  
ICOS  
CD40LG  
PIK3R5  
PIK3R1  
PIK3R2  
PIK3R3  
PIK3CA  
PIK3CB  
PIK3CD  
PIK3CG  
AKT3  
AKT1  
AKT2  
MAP3K8  
MAP3K14  
PDCD1  
CTLA4  
PTPN6  
CBLC  
CBL  
CBLB  
IL2  
IL4  
IL5  
IL10  
IFNG  
CSF2  
TNF  
CDK4  
RASGRP1  
PDK1  
PLCG1  
PRKCQ  
TRBC1  
TRBV12-3  
TRGV3  
BMP1  
BMP10  
BMP15  
BMP2  
BMP3  
BMP4  
BMP5  
BMP6  
BMP7  
BMP8A  
BMP8B  
GDF1  
GDF10

GDF11  
GDF15  
GDF2  
GDF3  
GDF5  
GDF6  
GDF7  
GDF9  
GDNF  
INHA  
INHBA  
INHBB  
INHBC  
INHBE  
LEFTY1  
LEFTY2  
NODAL  
TGFB1  
TGFB2  
TGFB3  
ACVR1B  
ACVR1C  
ACVR2A  
ACVR2B  
ACVRL1  
AMHR2  
BMPR1A  
BMPR1B  
BMPR2  
TGFB1  
TGFB2  
TGFB3  
TNFRSF11B  
TNFSF10  
TNFSF11  
TNFSF12  
TNFSF13  
TNFSF13B  
TNFSF14  
TNFSF15  
TNFSF18  
TNFSF4  
TNFSF8  
TNFSF9  
TNFRSF10B  
TNFRSF10C  
TNFRSF10D  
TNFRSF11A  
TNFRSF12A  
TNFRSF13B  
TNFRSF13C  
TNFRSF14  
TNFRSF17  
TNFRSF18

TNFRSF19  
TNFRSF1A  
TNFRSF1B  
TNFRSF21  
TNFRSF25  
TNFRSF4  
TNFRSF6B  
TNFRSF8  
TNFRSF9













## List of genes in the co-expression pink module

CCR1  
CCR10  
CCR3  
CCR4  
CCR5  
CCR6  
CCR7  
CCR8  
CCR9  
CCRL1  
CCRL2  
CMKLR1  
CX3CR1  
CXCR3  
CXCR4  
CXCR5  
CXCR6  
CXCR7  
CYSLTR1  
CYSLTR2  
DARC  
EDNRA  
EDNRB  
FPR1  
FPR2  
GPR17  
GPR32  
GPR33  
GPR44  
GPR77  
IL8RA  
IL8RB  
LTB4R  
LTB4R2  
PLAUR  
PLXNA1  
PLXNA2  
PLXNA3  
PLXNA4  
PLXNB1  
PLXNB2  
PLXNB3  
PLXNC1  
PLXND1  
PTAFR  
ROB01  
ROB02  
ROB03  
RXFP3  
XCR1  
ADIPOQ  
ADM

ADM2  
AGRP  
AGT  
AMBN  
AMELX  
AMH  
ANGPTL5  
ANGPTL7  
APLN  
AREG  
ARMET  
ARMETL1  
ARTN  
AVP  
AZU1  
BDNF  
BMP1  
BMP10  
BMP15  
BMP2  
BMP3  
BMP4  
BMP5  
BMP6  
BMP7  
BMP8A  
BMP8B  
BTC  
C19orf10  
C3  
C5  
CALCA  
CALCB  
CAMP  
CAT  
CCK  
CCL1  
CCL11  
CCL13  
CCL14  
CCL15  
CCL16  
CCL17  
CCL18  
CCL19  
CCL2  
CCL20  
CCL21  
CCL22  
CCL23  
CCL24  
CCL25  
CCL26  
CCL27

CCL28  
CCL3  
CCL3L3  
CCL4  
CCL4L1  
CCL5  
CCL7  
CCL8
