# Supplementary material for: Immune-Related lncRNAs with WGCNA Identified the Function of SNHG10 in HBV-Related Hepatocellular Carcinoma
Source: J Oncol. 2022 Jul 6;2022:9332844. doi: 10.1155/2022/9332844 (PMC9279027; doi:10.1155/2022/9332844)
Supplement: Supplementary Materials — Supplementary table 1: immune‐related gene expressions in HBV-related hepatocellular carcinoma from TCGA database for the WGCNA analysis. Supplementary table 2: the clinical characteristics of these eligible patients. Supplementary table 3: list of immune-related genes in the co-expression modules. Supplementary table 4: pathway analysis mapped the identification in the red co-expression module. Supplementary table 5: the co-expression analysis between immune-related genes in the red co-expression module and lncRNAs. Supplementary table 6: 33 immune-related lncRNAs were significant related to the overall survival. Supplementary table 7: lasso regression was constructed examining the relationship between gene signature and HCC risk. Supplementary table 8: quantification of the abundance of immune cell infiltration in tumor microenvironment by CIBERSORT web portal with the LM22 signature. [file 9332844.f1.zip › Supplementary table 1.xls]

## Sheet: Sheet2
Supplementary table 1: Immune‐related genes expressions in HBV-related hepatocellular carcinoma from TCGA database for the WGCNA analysis.
id	TCGA-DD-AAEI-01A-11R-A41C-07	TCGA-G3-A25Z-01A-11R-A16W-07	TCGA-DD-AADN-01A-11R-A41C-07	TCGA-QA-A7B7-01A-11R-A32O-07	TCGA-DD-AACB-01A-11R-A41C-07	TCGA-DD-AAD2-01A-11R-A41C-07	TCGA-DD-AAVX-01A-11R-A41C-07	TCGA-DD-AADY-01A-11R-A41C-07	TCGA-DD-AACQ-01A-11R-A41C-07	TCGA-DD-AADF-01A-11R-A41C-07	TCGA-G3-AAV0-01A-11R-A37K-07	TCGA-UB-A7MC-01A-11R-A33R-07	TCGA-DD-AACO-01A-11R-A41C-07	TCGA-DD-AAD0-01A-11R-A41C-07	TCGA-G3-A25U-01A-11R-A16W-07	TCGA-DD-A1EA-01A-11R-A131-07	TCGA-DD-AACG-01A-11R-A41C-07	TCGA-K7-A6G5-01A-11R-A311-07	TCGA-DD-AAE3-01A-11R-A41C-07	TCGA-RC-A7S9-01A-11R-A33R-07	TCGA-G3-AAV4-01A-11R-A38B-07	TCGA-DD-AADI-01A-11R-A41C-07	TCGA-DD-AACH-01A-11R-A41C-07	TCGA-G3-AAV1-01A-11R-A38B-07	TCGA-DD-AAEB-01A-11R-A41C-07	TCGA-G3-AAUZ-01A-11R-A38B-07	TCGA-DD-AADG-01A-11R-A41C-07	TCGA-DD-AADB-01A-11R-A41C-07	TCGA-DD-AADC-01A-11R-A41C-07	TCGA-DD-AAE7-01A-11R-A41C-07	TCGA-DD-AAE0-01A-11R-A41C-07	TCGA-5C-AAPD-01A-21R-A39D-07	TCGA-DD-AAE1-01A-11R-A41C-07	TCGA-DD-AACW-01A-11R-A41C-07	TCGA-2Y-A9H4-01A-11R-A38B-07	TCGA-DD-AADL-01A-11R-A41C-07	TCGA-DD-AAEK-01A-11R-A41C-07	TCGA-DD-AADK-01A-11R-A41C-07	TCGA-DD-AAVR-01A-11R-A41C-07	TCGA-DD-AAE9-01A-11R-A41C-07	TCGA-DD-AAVP-01A-11R-A41C-07	TCGA-DD-AAED-01A-12R-A41C-07	TCGA-DD-AACA-02B-11R-A41C-07	TCGA-DD-AADM-01A-11R-A41C-07	TCGA-G3-AAV7-01A-11R-A38B-07	TCGA-CC-A9FU-01A-11R-A37K-07	TCGA-DD-AACT-01A-11R-A41C-07	TCGA-DD-AAD5-01A-11R-A41C-07	TCGA-DD-AAD1-01A-11R-A41C-07
ACVR1B	9.86581	5.24582	4.61614	11.8157	4.93614	8.91176	2.44853	16.123	15.8081	5.68704	3.03014	5.94807	2.45427	6.10603	4.36921	8.32165	3.88171	7.1652	0.991868	9.42226	5.54131	7.27603	22.5324	7.03457	3.85073	3.30181	6.35541	13.2352	6.28592	4.249	11.8637	8.31202	9.14759	8.0802	6.23667	13.9145	5.92431	6.09337	5.15869	5.93667	9.84317	12.1925	5.21829	3.52732	15.7792	3.95312	6.18207	18.8731	24.3268
ACVR1C	0.0790098	0.137163	0.0162073	0.576896	0.0261392	0.188099	0.2262	0.169344	0.0199232	0.17066	0.140632	0.0979849	0.0670613	0.0834004	0.11593	0.720283	0.651607	0.0182466	0.18506	0.0907915	0.304412	0.0268007	0.21441	0.0925353	0.023039	0.127242	0.143724	0.0641754	0.202854	0.14166	0.00549096	0.0988068	0.227049	0.0971627	0.101887	0.467102	0.169796	0.0521759	0.0339123	0.145452	0.019802	0.0133716	0.131992	0.106026	0.219133	0.0902462	0.146528	0.0149593	0.0697182
ACVR2A	0.701871	1.05781	0.341197	1.41392	1.92726	1.07997	1.13624	2.50606	1.01474	1.09925	0.505999	1.91897	0.701871	1.10757	1.0248	0.584431	0.836738	0.828838	1.18134	0.875521	1.41121	1.49243	1.89742	1.37447	0.853811	0.601544	1.29546	1.41865	1.98178	0.915083	2.17768	0.805195	1.01807	1.91859	0.86384	1.56245	1.10067	0.719023	0.72467	0.99905	1.03815	1.39388	0.969578	0.572888	1.35372	2.9626	0.85522	0.812709	2.37092
ACVR2B	0.266888	0.317668	1.06488	1.25607	0.553943	0.317916	0.352289	0.274041	0.564336	0.436439	0.164267	0.418121	0.649694	0.339607	0.4969	0.497154	0.977346	0.245102	0.255792	0.444351	0.323248	0.621403	0.587958	0.550784	0.399821	0.28582	0.342118	1.35188	0.295144	0.195736	1.34369	0.225879	0.84285	1.01416	0.281296	0.424985	0.36962	0.231144	0.40668	0.395617	0.205857	0.831705	0.284463	0.44692	0.386694	1.34907	0.210473	0.672728	0.848807
ACVRL1	1.0324	1.73443	1.28624	1.92013	1.92117	4.4092	2.32543	3.16675	1.51208	1.44827	1.92652	1.0697	3.4545	0.498734	1.21884	2.13753	2.32896	1.57199	4.79989	0.82489	1.51465	4.55704	3.10186	2.1408	2.588	2.06247	2.05796	2.15188	2.27896	1.9604	3.90692	4.56839	1.97468	2.12717	3.05298	1.66211	2.09099	3.13198	4.3515	0.871907	2.00143	0.615979	1.84505	1.9806	7.71632	0.70062	2.46373	1.50885	4.81871
ADCYAP1R1	0.140825	0.019097	0	0.0483893	0.00502572	0.0153429	0	0.0142447	0.0670353	0.031321	0	0.0744456	0.0212367	0	0	0.0094423	0.0159451	0.0163718	0.0124534	0.0635408	0.0135438	0.0180352	0.0360711	0.0185486	0.0664448	0.0131731	0.152403	0.01787	0.00957951	0.032551	0.110852	0.0113984	0	0.00670608	0.012466	0.0649441	0	0.0051382	0.00912831	0.0615244	0.0053302	0	0.0725589	0.00930638	0.0634247	0.0878646	0.0106599	0.00575239	0.0252624
ADIPOQ	0	0	0	0.0065151	0	0	0	0	0	0.00515415	0	0	0	0	0.00391664	0.00466145	0	0	0	0	0	0	0	0	0	0	0	0	0	0	0	0	0	0	0	0	0	0.00253661	0	0	0	0	0	0.00459435	0.0046967	0.0114821	0	0	0
ADIPOR1	27.8813	35.3587	16.6738	76.2978	41.0996	31.2449	27.1519	89.771	41.0967	34.2754	25.0805	81.7066	39.1918	45.0855	11.713	67.2642	39.7638	41.9955	20.4554	48.2334	38.2094	57.4829	82.5349	39.6768	37.0307	25.0224	50.0805	32.2267	76.5669	26.8546	56.7195	63.2811	51.5369	41.1167	29.1717	43.1887	40.4398	40.1872	53.022	66.5154	61.8375	70.3421	33.0903	49.264	80.3938	52.8673	73.9458	54.4702	37.9301
ADIPOR2	27.3681	9.40141	5.48897	33.8045	16.2391	13.1563	9.61004	24.2333	62.0765	13.4089	13.763	26.1365	15.1062	66.5547	50.8089	15.0062	13.0472	27.2494	10.6629	12.7852	41.5509	12.0533	14.514	22.8341	15.3222	17.7494	34.0855	28.7773	23.5378	12.9068	10.8314	12.7847	18.0895	31.7586	15.6677	29.0978	46.597	16.0451	9.93081	12.0917	9.78856	24.1333	33.2688	11.9345	12.9708	17.0519	10.104	7.02699	31.0613
ADM	2.21779	1.97876	1.43927	2.53216	5.11625	1.23411	6.75352	0.835464	5.23026	2.5893	1.88634	11.4843	1.90836	4.76509	5.47075	3.48103	4.80957	3.38134	15.4323	2.36504	18.4773	0.979201	24.2879	4.58248	17.6369	3.07115	4.73696	3.43625	34.5536	3.52998	4.58826	2.03423	2.2938	1.33166	1.89053	1.73692	2.32379	2.42811	4.25248	10.5161	10.6247	5.66583	10.7481	1.15404	12.9294	5.48896	2.77326	26.9955	10.8313
ADM2	0.684194	1.95618	2.66616	1.78877	3.84631	7.69132	0.26251	2.09387	10.6078	1.82936	4.88633	1.88274	1.94255	3.82596	0.667599	1.42819	1.76424	3.41362	0	3.53767	0.421974	7.4287	5.96499	1.47334	0.33972	2.03108	0.416764	11.0496	3.66572	0.319481	7.23807	8.13462	2.84249	0.610737	3.37936	8.50456	4.81301	9.28505	1.88144	7.88195	1.63514	7.0519	0.367782	1.11024	16.974	24.646	5.10955	11.4105	8.60889
ADRB1	0	0.12703	0.0652936	0.0158013	0.012035	0.0367412	0	0.0113704	0.102738	0	0.0238551	1.30394	0.0254274	0	0.0569951	0	0.00954582	0.039205	0.725662	0	0.032433	0.0172753	0.561459	0.171326	0.222759	0.023659	0.315827	0.0142643	0.263807	0.412016	0.0176969	0.127379	0	0.0240883	0.0199014	0.062208	0.0746235	0.205072	0.10201	0.589323	0.446743	0	0.00599154	0.0668572	0.151881	0.00618844	0.0638172	0.0275502	0.0604952
ADRB2	1.1919	1.37262	0.10821	2.60126	1.76515	2.88468	9.9149	1.05526	4.21937	1.80237	0.902702	1.96684	1.2326	1.94272	1.76844	6.43287	1.54246	1.18035	6.54028	0.227923	4.78379	0.586914	1.15864	2.65531	5.80129	1.19589	14.4636	0.124109	5.47453	0.987327	0.0439931	0.844406	0.905393	0.572201	1.08841	1.09281	1.5459	0.305875	0.724538	5.04983	9.10662	0.580298	3.69879	2.62228	0.182489	1.04611	1.09993	0.285364	0.809219
ADRM1	39.7833	41.1959	71.8519	112.184	74.362	42.2447	37.1914	28.4417	46.0978	56.4322	76.8491	43.7175	22.9453	61.4591	38.4292	50.7164	36.0199	53.8024	47.1085	43.9629	61.0504	58.3062	65.0321	46.5433	49.125	44.2537	74.4007	58.4032	59.3211	30.6722	90.3246	98.4754	38.0383	35.9983	63.9091	37.675	52.3307	47.7835	45.5652	55.2133	75.1439	36.6215	66.9789	56.0318	124.746	97.5675	55.0461	69.9681	39.8619
AGRP	0.0257003	0.0189748	0.0487651	0.0590068	0.0898841	0	0	0.0849211	0.0479565	0.280085	0.178164	0.209227	0	0	0.0945939	0.140728	0.106941	0.0976019	0.074242	0.983436	0	0.193533	0.120961	0.0710868	0.0396117	0	0	0.0266335	0.171328	0	0.0660856	0.985315	0.037433	0.20989	0	0.0232303	0.0464444	0.0765799	0.435355	0.050016	0.142994	0	0	0.527069	0.056717	0.0231094	5.67183	0.0771603	0.0645448
AGT	614.658	1134.98	694.751	662.044	475.919	715.262	264.116	3605.75	609.09	1095.6	1227.34	964.166	1092.92	1685.44	661.445	1095.67	792.063	1097.52	853.042	2623.7	1524.38	792.542	418.169	662.637	639.137	787.864	1395.58	1638.82	973.181	1558.67	431.97	2557.38	4455.19	1793.08	1014.47	883.058	1415.75	1767.84	1139.79	1196.22	1032.23	838.243	440.941	1062.25	662.601	4553.34	1012.95	1948.22	524.613
AGTR1	5.08658	19.8319	1.39257	0.129618	2.56679	12.9898	10.6125	24.7636	6.79471	3.99231	2.52431	7.11966	2.63855	8.62364	1.67272	3.32627	5.25422	11.9956	7.55898	20.1722	20.6785	3.9962	15.8408	7.94823	3.94172	5.36293	4.22576	14.3162	28.5273	14.944	0.522604	2.29875	19.6524	30.4957	2.95484	8.62392	17.6601	7.12918	10.3941	3.26309	3.96827	29.5007	10.0263	6.9163	9.87984	20.3715	8.56432	1.13562	35.0488
AGTR2	0	0	0	0.0364988	0	0	0	0	0	0	0	0	0	0	0	0	0	0	0	0	0	0	0	0	0	0	0	0	0.158963	0	0	0	0	0	0	0.0061582	0	0.00406017	0	0.11933	0	0	0	0.00735382	0	0.12865	0	0	0
AKT1	6.37319	6.56651	2.61684	8.2661	6.34605	6.18633	4.41002	9.07049	11.4607	1.75307	7.1664	5.86505	2.09276	7.79401	7.04277	8.20291	2.33743	8.13853	3.7426	8.61005	9.13749	5.61218	10.0925	3.27944	3.23185	4.38424	6.04183	5.95747	5.93669	6.90499	5.29229	6.08833	5.99288	9.79777	5.00285	5.80998	5.95736	6.15576	5.33022	4.33063	3.2266	3.66256	3.93579	2.60317	9.61591	11.7208	6.815	7.65972	11.619
AKT2	6.80924	6.78024	3.00084	10.8213	6.1158	5.43634	5.26783	9.12243	14.2632	6.54377	13.6238	9.53676	3.09526	10.5567	7.55143	11.047	5.34178	7.68617	3.3859	8.22557	7.08371	3.46661	7.99672	6.01923	3.7399	4.58824	12.4988	17.6981	6.33795	7.15269	5.12785	8.59452	8.85259	16.3624	7.68314	9.90154	10.1695	5.19267	2.30765	7.98048	6.9126	5.28075	7.25708	5.49613	10.4143	18.6749	8.59309	7.58821	7.33206
AKT3	0.219663	0.610469	0.0550492	2.89915	0.260915	1.11737	0.836251	0.739526	0.170143	0.130486	0.234643	0.475446	0.25649	0.114659	0.432856	0.422122	0.508755	0.275449	0.505849	0.190314	0.415048	0.530577	0.575454	0.676371	0.22997	0.292081	0.422658	0.444542	0.486969	0.616954	0.634115	1.7835	0.217321	0.314305	0.287638	0.322179	0.704052	0.591554	0.974139	0.100824	0.37665	0.145985	0.216492	0.579332	5.37131	0.64846	0.718674	0.313158	1.90483
AMBN	0.00977352	0.064943	0.0185448	0.00747988	0	0.234794	0	0	0.00911866	0.0236696	0	0	0	0	0	0	0.108449	0.0463961	0	0	0	0.0122664	0	0	0.0150639	0	0	0	0	0	0	0.0129208	0	0	0	0	0	0	0.0103475	0.0951027	0	0	0	0.0105494	0.0107844	0.0966709	0.181255	0	0
AMELX	0	0	0	0	0	0.031384	0	0	0	0	0	0.0174033	0	0	0	0	0	0	0	0.0199959	0	0	0	0	0	0	0	0	0	0	0	0	0	0	0	0	0	0	0	0	0	0	0.0204717	0	0	0	0	0	0
AMH	0.0151797	0.0224147	0.0576058	0.57506	0.358355	0	0.0510468	0.0376187	0.0141627	0.60658	0.0438465	0.10111	0	0.131747	0.0139679	0.0249361	0	0.0576481	0.0219254	0.374334	0.178839	0.18099	0.529883	0	0	0.356586	0.0309601	0.015731	0.0379477	0.0245611	0.214682	0.893026	0	0.0442752	1.06446	0	0.0274322	0.0723705	0.00803564	0.0147709	0.0703825	0	0.383241	0.00819239	0.0502494	0.054598	0.070379	0.501318	0.114369
AMHR2	0	0	0	0.00427148	0	0.00744902	0	0	0	0	0.0193458	0.00826139	0	0	0	0	0	0.00529902	0	0.00474604	0	0	0.0175126	0.0102919	0	0.0383736	0	0.0115679	0.0186035	0.0541838	0.0430552	0	0.00812927	0.00651165	0.00806973	0	0.0100863	0	0.0118182	0.0108619	0.0103513	0.00873734	0	0	0.381832	0.0100373	0.0207016	0.0167568	0.0140171
ANGPT1	0.0771296	0.453531	0.0209071	0.754727	0.0529872	0.382349	0.379796	0.309471	0.0693916	0.200136	0.0986632	0.507634	0.0254435	0	0.230659	0.898986	0.252169	0.185687	0.525193	0.0187391	0.23042	0.262751	0.672016	0.271755	0.114634	0.315653	0.441032	0.0970584	0.96867	0.222852	0.177081	0.30226	0.810459	0.0739175	0.963834	1.26237	0.632211	0.170728	0.612447	0.117939	0.148157	0	0.107916	0.407343	0.127661	0.966006	0.29119	1.51622	1.20721
ANGPT4	0.0041991	0	0	5.86171	0	0.0112086	0.0635437	0.00693753	0	0.0101694	0.0436645	0.0155387	0	0	1.51464	0.0137959	0	0.00398673	0.0242604	0.00714139	0.00494714	0	0.0230574	0.0193578	0	0.00481175	0.0856434	0	0.0209946	0.0407653	0	0.00555131	0	0.00979811	0.0182138	0.00379554	0.0227653	0.0100098	0.0222286	0	0.0155757	0	0.00365566	0.00453245	0.00463342	0	0.0155749	0.012607	0.0790936
ANGPTL1	1.78867	0.225779	0.0547407	0.132475	0.221976	1.18591	0.814933	107.758	1.67421	0.0698681	1.88662	0.106757	0.607558	0.0813765	1.57154	0.183248	0.184069	2.67879	0.150011	1.24133	0.0679778	0.296906	0.565763	0.489426	0.346833	1.17689	0.158869	0.095671	0.163474	0.681515	0.237388	0.221211	0.050424	0.222146	0.817559	2.26347	0.260678	0.2854	4.16009	0.0561449	1.47675	0.397435	0.0602781	0.554288	0.127334	0.114142	0.310317	0.115487	2.10841
ANGPTL2	1.17133	1.59169	0.469419	1.00077	7.54874	7.66156	2.50431	3.09468	1.4697	0.53189	1.28919	0.668858	2.09855	23.6517	1.33334	2.07347	1.12746	2.41114	3.98899	1.50265	6.28138	4.09348	2.85155	4.83193	4.36558	2.04227	1.50343	6.03272	1.49776	1.84623	3.27162	3.07037	1.38251	0.376989	0.751889	0.958361	3.80474	2.74106	3.77919	0.884315	8.25889	0.632305	2.08783	1.83109	3.77161	25.7094	3.07118	0.626541	12.0776
ANGPTL3	84.3217	148.081	104.227	10.9258	124.496	75.8351	129.183	194.679	64.5294	31.0918	123.427	20.5994	80.0557	121.67	50.5666	40.8363	168.517	83.0973	104.942	77.1124	211.918	71.8445	65.2965	156.664	138.299	33.7288	162.553	54.852	144.528	80.3043	2.73419	16.03	27.5956	70.7399	22.8687	151.545	99.9215	104.063	121.269	136.141	58.0301	95.7322	172.038	89.0658	1.07996	80.7812	88.4918	4.23839	79.901
ANGPTL4	34.4601	116.423	0.630449	1.8466	9.66989	36.3838	107.623	78.9954	2.06665	211.082	190.84	92.3547	65.4859	13.3802	215.637	9.72065	26.3893	28.9844	124.743	67.9299	176.059	75.6176	18.319	25.4411	16.412	216.802	5.87311	16.2981	32.2226	54.8099	3.25475	62.4267	1.07159	4.66097	36.8764	6.83603	21.7161	44.9387	47.2132	20.8612	101.222	18.4031	13.8913	20.929	13.3557	1.003	29.9294	38.8174	19.103
ANGPTL5	0	0	0	0	0	0	0	0	0	0	0	0	0	0	0	0	0	0	0	0	0	0	0	0	0	0	0	0	0.0138191	0	0	0	0	0.00967398	0	0	0	0.00494147	0	0	0	0	0	0	0.0182989	0.0149118	0	0	0
ANGPTL6	0.55817	2.07381	1.82781	2.99026	0.944586	1.33371	1.45318	0.104117	1.03314	1.4499	3.12052	0.66629	0.0831551	1.96317	1.8142	1.05495	0.237254	2.45312	0.689181	0.512916	1.294	0.23728	0.395475	0.514632	0.333022	1.77439	3.01132	2.05253	0.615162	2.59286	0.532442	1.15448	0.183578	0.136545	1.0934	1.3671	0.650775	1.42713	0.88643	0.858505	0.500907	0.422805	0.478095	0.651068	0.625837	0.20238	1.78648	1.32443	2.61145
ANGPTL7	0	0.00647753	0	0.013429	0	0	0.0147518	0	0.00818561	0	0.557524	0.0194796	0	0	0.0242191	0	0	0.00832974	0.430856	0.00746048	0	0	0.0137644	0	0	0	0.00894701	0	0	0.0283912	0	0	0	0	0	0.00793026	0	0	0.00928875	0	0	0	0	0	0	0.015778	0	0.00878023	0.0440681
AP3B1	2.88213	3.1988	2.25782	9.03269	4.6783	6.08358	5.00863	7.46428	2.50357	5.51957	2.04517	7.6933	0.962629	4.12924	4.004	13.0843	3.84483	3.1444	2.97183	3.16344	6.77846	2.97	9.12131	9.21517	1.92096	1.42509	3.95264	5.698	4.48103	2.95533	5.26996	3.87771	2.899	5.25849	4.72249	6.00905	4.56771	1.70159	3.79364	4.17146	4.76744	2.84252	3.73212	3.05004	6.65389	5.25079	2.89918	6.79019	6.24667
APLN	0.869944	0.402561	0.244115	6.92511	3.53535	1.34912	6.69561	1.80165	2.31493	0.370922	0.283135	1.06551	0.441378	10.8005	0.439707	9.2521	1.54653	0.354808	16.8393	0.166705	6.99398	0.430584	5.38241	3.82403	2.0868	0.266767	2.64272	3.25695	3.12431	0.0793006	0.582873	5.22399	7.62039	6.50429	2.22331	2.41992	0.94106	0.40891	0.836717	5.85405	7.6695	1.57286	8.68294	0.271121	5.42154	4.40702	1.30659	0.275899	0.215405
APLNR	4.91137	5.11923	0.219273	2.29547	0.909373	13.243	5.09614	12.818	1.21051	1.60924	2.65825	0.983559	11.1107	0.0284936	1.52254	1.92137	1.47173	4.70787	10.5308	2.34502	1.73898	17.9583	3.2799	1.93239	4.94674	6.26598	2.14269	3.62541	3.69432	3.73112	7.13173	5.31242	3.96313	4.19796	5.95431	2.64462	9.50213	5.78183	17.7128	0.408906	2.80572	0.0575617	0.571625	8.28925	1.31572	0.236164	6.56583	0.909437	17.2883
AR	5.42863	6.92665	0.306218	5.8038	5.08787	3.14057	4.80681	6.22642	7.26466	2.14218	7.57567	13.2566	5.21014	8.85757	12.0143	23.4322	1.48802	4.35295	4.30235	1.44682	20.1251	2.32447	5.30974	10.0118	11.2596	5.07939	12.2413	0.391829	5.26651	7.00303	0.185753	13.9777	1.77301	3.68142	12.7424	8.15502	6.21343	3.90108	0.999136	18.4466	10.2421	0.211737	2.56375	3.22012	2.77289	0.00552818	4.84001	2.71949	3.48177
ARAF	20.757	24.0436	10.1283	23.2526	23.0977	17.1393	13.1217	25.126	37.4213	16.613	13.9839	24.0607	66.4085	20.2955	24.4613	37.3737	19.715	17.1021	16.8558	11.2035	17.7799	27.4526	20.8139	17.0485	12.2423	29.5329	15.0785	17.4239	9.45143	17.2375	10.3692	46.1001	14.4491	20.7047	20.9848	22.397	13.2699	14.5779	16.8129	7.68569	17.9144	12.7213	22.737	20.84	22.4872	16.352	13.0205	14.5306	20.5898
AREG	0.0834011	2.52461	0	0.0638286	0.145843	0.683764	0.0400661	0.0196844	0.0111161	0.0432817	0.0275317	0.176357	0.220099	0.465332	0.537199	0.169625	0.313987	0.124431	0.240926	0.0202628	0.252664	0.134581	0.392535	2.93302	0.0550911	0.054611	0.243003	0.123471	0.198566	0.366278	0.520825	0.409531	0	0.0556019	0.120586	0.107694	0.0645937	0.00710037	0.744238	0	0.618717	0.186517	1.60774	0.0128603	0.867687	0.267834	0.11048	2.39665	1.06225
ARTN	0.0221614	0.021816	0.056067	0.152645	0.232522	0.147887	0.0372624	0.0244092	0.0964904	0.0447256	0.0768154	0.0765407	0.0682322	0.216385	0.0203921	0.0404501	0.102461	0.105203	0.0426794	0.163322	0.200171	0.0834421	0.139073	0.0408656	0.0455431	0.0423245	0.0677994	0.0535877	0.320095	0.0836676	0.550862	0.585958	0.0322785	0.0430925	0.160211	0.113512	0.0800982	0.647143	0.109494	0.0575053	0.109604	0.531959	0.064311	0.071762	0.758061	0.478256	0.123298	0.15525	0.435981
AVP	0	0	0.0601883	0	0	0	0	0	0	0	0	0.0469525	0	0.0688267	0	0	0.131991	0	0	0	0	0	0	0.0877388	0	0	0	0.0657448	0.211461	0	0.081566	0.125806	0	1.33229	0	0	0	0.15123	0	0.0617322	2.11789	0	0	0	0.0350014	0.684547	0	0	0
AVPR1A	0.207447	0.785249	0	7.62316	0.0345488	0.285656	0.332193	1.65382	1.20429	11.8502	2.67455	0.0268069	0.133824	0.00357234	51.0239	0.0613039	0.543497	0.937882	0.285364	0.0588006	0.612944	0.0206635	0.304792	0.391639	0.131955	0.0490519	0.329078	0.453846	0.0713411	2.18441	0	1.34948	1.64984	2.18208	0.852203	5.5866	0.124963	0.0333597	0.310272	0.256329	0	0.00515478	0.0659331	1.03427	5.96602	0.0532955	8.11577	0.0527255	0.215012
AVPR1B	0	0	0	0	0	0.0115291	0	0	0	0	0	0	0	0	0	0	0	0	0	0.00734561	0	0	0	0	0	0	0	0.00895205	0	0	0.0222127	0	0	0	0	0	0	0.005148	0	0	0	0	0	0	0	0	0	0	0.0325422
AVPR2	0.114413	0.0259914	0.0166995	0.047149	0.0153903	0.0469846	0.0739904	0.174486	0.057479	0	0.193204	0	0.162583	0	0.170066	0.0192768	0.0122072	0.100271	0.610175	0.202065	0.0518441	0.110458	0.103557	0.0730305	0.691812	0.110935	0.251302	0.0638441	0.0146677	0.0569606	0.0452617	0.314148	0.0512753	0.143752	0.101799	0.0318206	0.0477142	0.27798	0.288855	0.0171279	0.0326454	0	0.00766197	0.104496	0.0291339	0	0.0489656	1.0217	0.143671
AZGP1	236.638	161.537	152.988	83.7151	78.4671	105.638	444.417	412.524	229.756	376.075	607.449	316.878	251.997	72.9425	296.289	174.273	160.58	188.809	425.575	209.545	255.901	40.092	54.1736	202.009	1155.09	763.457	688.022	188.176	72.4187	344.288	21.1386	403.603	311.026	291.633	1475.75	327.242	241.403	144.15	167.715	384.303	317.894	186.945	225.298	443.631	46.0209	213.208	62.8713	71.1745	63.6364
AZU1	0.0110123	0	0	0.0168559	0	0.0146975	0.0370325	0	0	0.0533396	0.0636179	0.0815019	0.0406868	0	0.060799	0	0	0.0209108	0	0.0280929	0.0129741	0.0691061	0.0345538	0.0101534	0	0.0252381	0	0.0342367	0	0.0178182	0.0283171	0.0727929	0.0160397	0	0.0159222	0.0597238	0	0.0328138	0.0466365	0	0	0.0172395	0	0.0594328	0.194422	0	0.0612688	0.0440833	0.0138284
B2M	534.485	629.301	383.119	312.59	1301.7	709.675	1610.68	405.063	309.852	472.946	258.651	220	175.825	422.1	190.309	731.295	385.765	1920.56	539.32	547.52	490.76	583.433	546.886	290.32	184.714	377.733	278.776	426.948	420.237	380.462	284.91	776.113	256.668	251.459	480.768	305.047	905.571	234.571	1297.02	685.975	641.987	124.823	199.991	640.212	722.89	129.684	891.022	854.407	463.473
BCL10	2.14529	3.1215	1.04408	5.4106	3.76365	3.21644	2.44769	2.30152	4.0226	2.28568	1.51295	3.03626	2.02013	3.39288	2.35216	4.77511	3.22676	2.8039	1.84106	2.68306	4.90721	3.68905	3.99401	3.8339	1.32047	1.54042	2.17352	4.22985	6.14075	2.06239	2.74029	4.60411	3.33771	2.04782	2.4069	5.57181	2.34123	2.7645	3.43643	2.0604	2.51901	3.22754	2.36488	2.74413	7.9854	3.53864	3.19059	2.83704	5.02918
BDNF	0.00507364	0.0149837	0	0.00582445	0	0.0575576	0.0127963	0.0041912	0.0426032	0.0153592	0.00293103	0.011265	0	0.00275218	0.0140058	0.0083346	0.00351863	0	0.0146566	0.00215718	0.600736	0.0127355	0.00994983	0.0257284	0.00781999	0.0116278	0.00517401	0.0184026	0.0126836	0.0164185	0.00652318	0.00335374	0.00369493	0.0503147	0.00366787	0.00687904	0.00916886	0.0136063	0.0107433	0	0	0.0158852	0.0132511	0.0219057	0.100772	0.0159676	0.028228	0.00507756	0.0318555
BID	20.9599	8.93736	12.0334	4.29924	9.33691	12.7551	9.71277	5.41394	8.24908	6.46008	9.18468	5.05311	15.656	10.0999	6.85148	5.15575	23.6201	11.472	6.27043	7.3193	5.30192	17.0773	9.87676	13.6733	6.35762	11.4877	5.38191	13.9544	17.6793	7.30291	21.0089	13.5103	9.71304	14.3445	6.89619	13.305	8.10869	13.9043	9.22985	9.60893	4.43937	12.0366	15.9981	22.0947	20.6961	11.0675	7.72345	8.22071	11.7846
BLNK	3.56707	5.6916	0.744111	2.80807	5.79621	6.80415	10.3515	6.88737	3.51853	14.0835	1.86207	5.08911	6.43076	1.6785	2.12064	5.95973	9.84306	5.31462	2.00191	6.64208	4.35441	13.7004	10.2991	1.73357	2.7324	4.22909	2.77753	7.87755	5.62255	6.37134	2.36216	2.59224	5.49284	6.17983	2.79621	4.3605	6.00938	5.17999	9.78838	2.18505	3.46723	8.8051	0.584606	6.50598	9.28877	1.27526	7.33263	5.87623	15.2187
BMP1	3.13277	4.0108	0.628339	1.03788	2.5599	3.47257	4.3218	3.34342	1.2432	3.21746	1.82801	12.9563	1.85464	4.87282	3.4413	7.16104	1.66956	2.89199	5.62957	1.38337	10.1622	1.45795	4.05932	9.28313	6.2544	2.09909	7.67328	2.51116	7.79655	1.80302	3.8183	9.18309	2.77911	2.46527	2.29516	6.34754	11.9592	3.18104	1.58604	11.1041	6.47307	2.52618	4.50971	1.54889	3.4626	1.97093	5.86836	9.35296	3.81838
BMP10	0.0123958	0	0	0	0	0	0	0.0204797	0	0	0.0143221	0	0	0	0.0228124	0	0	0	0	0	0	0	0	0	0	0	0	0	0	0	0	0	0	0	0	0	0.0224012	0	0	0	0	0	0	0	0	0	0.0919547	0	0.0466972
BMP15	0	0	0	0.0127456	0	0	0	0	0	0	0	0	0	0	0	0	0	0	0	0	0	0	0	0	0	0	0	0	0	0	0	0	0	0	0	0.0150534	0	0.00992486	0	0.0648215	0	0	0	0	0	0	0	0	0
BMP2	3.35338	2.12157	5.39035	0.959796	1.087	3.50039	1.58609	4.25205	0.951326	3.2419	0.718196	3.61176	0.987137	4.74426	1.68081	0.764348	16.8125	0.973255	3.71734	0.67695	0.725912	0.739092	13.9866	7.39521	0.731162	1.44958	1.3234	2.48629	2.00831	1.11163	6.029	0.908276	3.24824	9.94312	3.26386	2.48895	1.1726	2.32013	1.62218	1.30522	0.303382	3.41438	1.34339	1.43018	6.64236	1.14239	3.4786	0.720306	1.56797
BMP3	0	0	0	0	0	0	0	0	0.00319487	0	0	0	0	0	0.00315093	0	0	0	0	0.00582371	0	0	0	0.00631442	0	0	0	0.00354866	0	0.0055406	0	0	0	0.00399511	0.0247552	0	0.00618826	0.00612212	0.239278	0	0	0	0	0	0.0188925	0	0.00635055	0.00342695	0.0730998
BMP4	0.834583	0.5127	0.0967074	0.429066	33.3999	1.38596	0.803403	2.21037	1.99124	0.146576	0.655116	2.4424	0.906218	36.9707	0.721056	4.08855	1.29013	1.14925	0.864984	0.601336	19.1398	2.76657	0.659672	3.08381	8.34648	0.467223	7.68582	2.47583	11.7962	0.556641	1.14674	0.589571	2.53325	5.29218	0.681638	1.8485	1.85362	4.51427	0.553093	6.41004	6.22686	4.40823	29.4678	0.625772	1.42002	10.0079	1.0988	0.675833	2.06401
BMP5	0.00993674	0.0696958	0.169691	0	0.529979	0.172406	0	0.00820847	0	0	0	0.0110312	0.0275346	0	0.00457172	0	0	0.132079	0.0143525	0	0	0.380374	0.0272815	0	0	0.0113865	0.0152	0	0.0248408	0.200973	0.0255513	0.00656831	0.0144731	0.00579655	0.0215506	0	0.152636	0.130279	0.878449	0	0.0737164	0	0	0.00536278	0.0109645	0	0.0460704	0	1.4911
BMP6	0.12007	0.0782197	0.0402049	0.0162163	0.185265	0.452471	0.795673	0.175035	0.0724868	0.0427628	0.138728	0.182954	0.0260951	0.0842879	0.285959	0.417689	0.0293894	0.100586	0.642701	0.0180179	0.407737	0.0709158	0.121889	1.43916	0.130633	0.0809343	0.273701	0.13175	0.22365	0.365695	0.10897	0.709642	0.113161	0.197767	0.0816958	0.044689	0.382915	0.227293	0.4038	0.618544	0.537069	0.0442273	0.0307444	0.0762364	0.319533	0.0508075	0.537042	0.0282736	0.629707
BMP7	0	0	0	0.0360561	0	0	0	0	0.0473369	0.00877671	0.0125615	0.00536426	0	0.00393168	0.00333471	0	0	0	0	0.0123267	0.00853925	0.127355	0	0.00334135	0	0	0	0.0112669	0.00603979	0	4.35189	0.0479106	0.00527848	1.44602	0	0.00655147	0	1.26776	1.15874	0	0	0.0510597	0	0	0	0.0195522	0	0.00362683	0.395918
BMP8A	0.0116046	0.085678	0.0220192	0.106575	0.020293	0.232319	0.0585363	0.0191725	0.324812	0.0281041	0.0268158	0.214713	0	0.0377692	0.0854252	0.0127088	0.0160959	0.077124	0.0167615	0.0394718	0	0.0582582	0.254885	0.128393	0	0.0265954	0.0473367	0.156338	0.0386804	0.0751059	0.0895202	0.138074	0.0507071	0.094773	0.0503356	0.0944039	0.062914	0.0553258	0.0614309	0.158089	0.107612	0.109	0.0303083	0.0250517	0.204878	0.104348	0.107607	0.0464543	0.174866
BMP8B	0.0152712	0.169124	0.108662	1.29146	0.761087	0.942649	0.083451	2.00581	1.05792	0.055476	0.471985	3.30306	0.134002	0.0248515	1.37359	0.643885	0.227702	0.652451	1.40065	0.181802	0.0224896	0.982279	2.39885	0.0176001	0.0706126	0.00874965	0.0194667	0.0989112	1.59705	0.0370637	1.35476	0.73185	1.16775	0.0400879	0.0496799	1.26303	0.282874	1.3674	0.371868	0.0520097	0.120371	0.531923	0.00997114	0.317308	0.412844	0.0995553	0.396498	0.328585	1.20812
BMPR1A	0.629149	0.567873	0.308285	0.888925	1.5173	0.627459	0.75852	0.565413	0.488625	0.76184	0.521222	1.50946	0.622631	0.725688	0.470771	1.5446	0.453105	0.868099	0.359499	1.08175	1.14442	1.24301	1.04806	1.00398	0.628711	0.643698	1.03995	1.9954	1.48351	0.455852	1.55557	0.699219	1.24616	1.69793	0.50481	1.0077	1.42434	0.77151	0.645972	2.1898	0.932837	2.005	0.833627	0.514918	2.66246	3.29022	0.762901	1.13646	2.2681
BMPR1B	0	0.0114835	0	0.0952286	0	0.058124	0	0.0154182	0.00290231	0	0.0179707	0.0161157	0.051719	0	0.0114496	0	0.00431467	0.0118137	0	0.0105808	0.0036649	0.0702754	0.100047	0	0	0.0285168	0.00317228	0	0.0311061	0.0251662	0.0719906	0.0287873	0	0	0.00449767	0	0.0112432	0.0389305	0.0197607	0	0	0	0	0.0134307	0.0892448	0.0867117	0.0346141	2.43448	0.253905
BMPR2	1.16063	2.20017	0.316397	4.88099	1.88236	2.18142	2.60107	7.19553	2.13801	1.71329	1.56989	3.11212	1.2779	2.35175	1.98251	7.39677	1.65333	1.40759	1.55001	1.17226	5.37231	1.86694	4.46931	2.82519	1.21888	1.04052	2.45978	3.19258	5.28013	1.52264	2.48775	2.30922	2.31089	2.56374	1.91203	3.65464	3.83686	1.66081	2.12899	1.14383	1.60447	1.21732	1.58966	1.01041	5.08264	4.24133	2.12183	2.30488	6.95339
BRAF	0.544786	0.931533	0.545568	1.19724	0.896434	0.999753	2.4077	2.35955	1.7684	0.568061	0.410886	3.27315	1.1287	1.13897	1.37682	3.54244	1.25676	0.621399	0.937152	1.30452	1.47756	1.67137	3.59091	2.26031	1.1633	0.539733	1.51815	2.68758	2.45585	0.893717	2.42719	1.67051	1.66413	2.20252	1.29366	2.69639	1.51437	0.633544	1.04742	1.07127	1.58925	3.3255	2.12768	1.31491	1.99752	2.49016	0.887549	1.2305	2.02142
BRD8	2.38819	2.69319	2.65967	8.04245	3.83999	5.4375	4.70431	3.80291	5.10374	6.67796	1.79982	6.26975	3.06816	3.7307	5.98487	7.91037	3.85361	1.50543	2.72898	4.18954	6.87813	3.70033	10.1997	10.9582	1.37873	2.03411	7.89456	4.2885	12.0101	3.10213	5.29544	2.51253	1.79808	3.69337	5.61259	5.66745	5.22734	2.31836	2.72023	1.33412	2.7392	4.48025	5.14805	5.89249	3.66838	4.05433	1.97419	6.63465	4.30415
BTC	0.0139453	0.0360359	0.0264606	1.95309	0.0121931	0.260567	0.656538	0.921587	0.0195164	0.278626	0.386696	0.227059	0.257615	0.0756458	0	0.297808	0.174082	0.1655	0.17121	0.100796	0	0.131267	2.81137	0.244294	0	0	0.0497741	0.137291	0.59265	0.304611	0.215154	0.110616	0.985114	0.0813494	1.11904	0.623951	0.0126007	0.295028	0.199319	0.990587	0.0775907	0.163732	0.0121405	0.173102	1.6234	0.0626975	0.310347	0.418682	2.25022
BTK	0.626603	0.351724	0.749202	0.170799	1.35842	0.721729	0.461842	0.113451	0.0640678	0.181894	0.123968	0.215992	0.332991	0.162965	0.106628	0.723825	0.553614	0.383026	0.37194	0.288312	0.369114	0.818748	0.787792	0.530243	0.191833	0.531141	0.175068	1.09412	0.457773	0.506928	0.209683	2.2582	0.325057	0.43062	0.446782	0.256036	1.11686	0.685459	1.06327	0.250572	0.278592	0.564369	0.0709909	0.291848	1.37336	0.382056	0.421846	1.25847	1.33655
C3	2089.26	1598.21	532.637	1863.41	563.703	1800.48	1708.17	2756.45	426.658	1309.61	2411.76	899.76	1596.85	1168.35	1023.88	1845.15	740.167	973.696	532.089	1200.99	603.092	2659.61	768.236	710.456	924.748	1282.59	1015.05	1044.6	398.778	1376.42	1047.9	1119.86	1336.86	931.297	775.224	804.654	1206.23	1706.29	693.864	68.5049	411.205	861.198	471.087	1591.3	366.192	662.69	2150.84	415.218	1100.62
C3AR1	4.59523	2.96017	2.22323	0.420338	4.49806	4.16602	1.73923	1.05864	0.281837	0.421208	0.444205	1.22623	3.44967	0.824267	0.867574	3.69916	3.19954	2.08581	1.7717	0.941858	1.42356	3.30874	6.01014	2.12684	0.931181	1.62585	0.392067	2.23876	2.22734	2.65119	1.64767	6.89792	0.906628	1.45244	2.10438	0.860506	3.92055	1.59837	4.25456	1.35391	1.46003	1.27537	0.278921	1.65993	4.7069	0.78195	1.39205	6.73327	2.93115
C5	66.4668	176.282	24.3111	65.9875	10.0069	78.5808	65.2659	285.007	38.6185	30.0395	45.914	62.9429	92.0104	39.1442	114.768	72.169	55.8816	94.5538	32.975	59.5868	45.083	97.6488	111.742	20.4284	62.2732	51.9391	47.9483	148.042	69.4494	79.0379	30.5579	33.6226	61.7196	117.394	61.7108	44.7407	94.3981	73.8301	94.5159	43.0085	25.8975	29.5005	16.6046	70.6403	82.2196	86.1566	84.6002	25.8884	109.8
C5AR1	3.16715	3.21276	1.54026	0.361546	1.5824	3.91619	4.26246	0.747513	0.52146	1.62751	0.238316	1.21139	2.38455	0.938408	1.71429	2.31719	1.57813	2.7227	2.79664	0.7129	1.76377	1.0021	2.641	1.58275	0.625573	3.26326	0.339265	0.917074	1.53028	1.88401	1.1121	4.80279	0.300428	0.721939	1.65468	0.655549	3.29464	0.785116	4.43801	0.440263	0.888494	1.0312	0.666145	3.23185	3.60486	0.53248	1.57947	5.7066	3.18332
CALCA	0	0.667612	0.0175078	0.0564927	0.435651	1.03443	0.558516	0	0.00860874	0.134076	0.0213216	0.0682885	0.187498	0	0	0.0101049	0.0511921	2.79454	0	9.39182	0.0108707	0	0.0796174	0.859233	0	0.486366	0.0094095	0.0191241	0.184532	0.179153	0.0949049	0.0609914	0.107514	0.183006	0.0533634	0.100082	0	1.51766	0.136765	0.933758	0.154015	0.144445	0.0240985	0.438216	1.47629	0.0165936	0.205343	36.1515	0.0115865
CALCB	0.0049873	0.0110465	0	0.0458026	0	0.0332812	0.0251571	0.032959	0.0651439	0.0120783	0.0460984	0	0.0460659	0	0.0596588	0.0600802	0	0.0426156	0.0144071	0.0466503	0.0176273	0	0.164313	0.0413846	0.00768691	0.0285747	0.0356017	0.0413473	0.00831181	0.0403477	0	0.0659333	0.0290564	0.133829	0.0072109	0.162287	0	0.0564711	0.0105604	0	0.00924966	0.0546522	0.0347348	0.0915147	0.10456	0.0627835	0.0184984	0.0299469	0.00626267
CALCR	0.00485774	0.0107596	0	0.00743546	0.0169895	0.00648333	0	0	0.0271936	0	0	0	0	0	0.00446993	0.00531995	0.0202134	0	0	0	0	0.0182904	0.152423	0	0.00748723	0.011133	0.0445845	0.00503415	0.00809589	0	0	0.0706426	0	0	0.00702358	0.0175635	0	0.00289495	0.00514305	0.094538	0	0.0228139	0	0.0262169	7.74011	0.0305763	0	0.165291	0.0122
CALCRL	2.14438	2.82667	0.187981	1.29628	0.692973	4.71309	1.23589	4.98425	0.71262	0.619169	0.819715	2.26823	0.537236	0.308572	4.81975	2.47091	0.288122	1.53833	1.81869	1.33975	1.88632	1.9052	1.88769	3.67432	1.06887	1.70652	1.63929	1.80496	1.82153	1.9339	0.879291	1.96882	0.758724	1.15584	2.04695	2.05962	3.97919	2.07403	5.22412	0.342069	2.44788	0.130076	1.54134	1.21767	1.08964	0.525875	1.49355	0.681231	6.98269
CALR	565.696	667.02	613.36	790.339	758.473	600.016	305.147	515.548	511.802	886.172	1142.09	277.303	354.436	406.14	306.621	378.93	402.814	803.287	361.726	914.577	323.655	575.003	285.221	217.568	301.095	368.916	520.417	683.121	389.645	305.606	712.823	927.399	554.273	312.288	348.977	675.893	509.085	781.795	426.38	1009.84	613.717	460.865	396.384	479.74	748.447	583.364	872.529	839.432	436.715
CAMP	0	0	0	0	0.0921764	0.0351754	0	0	0.0245898	0	0	0.0195058	0.0973752	0	0.0727548	0.0288634	0.036556	0	0.0380677	0	0	0.0992345	0	0	0.162488	0.030201	0	0.245815	0.0439243	0.042644	0.067771	0.139372	0	0	0	0	0	0.0314132	0.753398	0	0.0488804	0.082518	0.0458896	0	0.0290817	0	0	0.13188	0.165477
CANX	88.3118	84.3739	114.913	205.397	107.974	247.119	86.9814	184.114	82.1391	72.1901	52.0854	122.179	70.4909	98.9417	79.9922	177.292	109.465	83.2266	90.1621	115.89	116.566	107.715	229.239	263.817	38.2187	37.7028	111.913	106.867	298.926	48.8496	151.946	41.2038	102.887	89.6112	90.1491	139.288	153.339	132.904	149.275	100.841	118.815	97.8142	64.6935	133.73	140.517	120.109	199.568	120.766	175.756
CARD11	0.66326	0.212508	0.720277	0.491644	0.970183	0.929752	0.420835	0.117161	0.0817309	0.232356	0.221705	0.0833563	0.161827	0.12219	0.111314	0.648707	0.22565	0.447534	0.0903775	0.485963	0.176924	1.25127	0.615177	0.296147	0.0450061	0.478006	0.106349	1.65568	0.820349	0.742442	0.66504	1.11398	0.425306	0.501279	0.392034	0.143281	1.95246	2.302	1.38235	0.868645	0.139258	0.404876	0.0217895	0.238638	0.699642	0.468866	0.665309	0.192035	2.7029
CASP3	7.47064	6.09072	4.49803	15.561	7.55646	3.79661	6.67351	5.37121	5.88319	8.39012	4.71878	3.95501	2.82771	11.3747	16.7524	6.14909	3.24105	5.82602	9.62631	7.81554	4.15737	5.95042	8.36264	7.34379	1.86862	7.43523	6.83794	16.4384	5.26016	5.85204	6.79229	10.5032	7.46784	10.7863	11.9276	7.50568	6.37699	3.72556	7.48634	4.03344	4.29605	5.98006	5.8434	2.92428	14.5959	10.6092	5.06205	8.41859	11.9496
CAT	139.88	72.1457	6.94594	190.041	80.7664	98.8877	63.9872	178.056	186.774	72.2376	130.647	103.863	69.315	192.786	326.337	114.892	47.7555	95.7886	96.4018	37.7531	130.303	54.4772	31.2787	91.9397	97.6349	137.015	162.634	89.9945	55.24	148.199	32.0405	41.0193	90.3421	85.5063	131.989	109.457	104.797	50.4031	52.6817	107.17	100.174	34.0808	82.1088	56.7804	11.1793	36.0972	64.1353	26.8715	92.2892
CBL	0.595986	0.461518	0.350956	1.17307	0.482168	0.996569	0.627751	0.64229	0.412246	0.296553	0.178086	0.855557	0.0822572	0.847243	0.472763	1.19661	0.353938	0.413001	0.281997	0.6233	0.883749	0.662025	2.30397	1.01373	0.205891	0.288483	0.445353	2.72608	1.14454	0.457219	1.60738	0.683759	0.895505	1.18486	0.403616	1.12231	1.1018	0.518475	0.600166	0.416619	0.273159	0.39143	0.703733	0.275435	2.0995	1.3798	0.355724	0.824398	2.65379
CBLB	0.666661	1.20602	1.65829	1.20064	0.713394	1.65999	0.62181	2.17818	0.824682	0.740995	0.611223	1.97603	0.410514	0.446187	1.81132	1.25133	0.416334	0.590434	0.629966	1.06328	0.992523	0.892901	0.996469	1.39598	0.470309	0.6062	0.662937	1.50204	0.682663	1.1699	1.10019	1.14005	0.652168	0.653961	0.848802	1.28762	1.03993	0.901324	0.921775	0.832666	0.778144	2.87649	0.993292	0.846675	1.86649	0.720242	0.802709	0.848077	2.59889
CBLC	6.59059	5.27904	1.53368	1.88433	0.608866	8.43095	10.2242	18.6339	14.9316	5.42077	21.3213	3.58003	19.8705	7.19056	8.63896	3.90844	41.5326	16.1036	15.1411	5.13903	2.84216	37.9403	9.01315	2.09812	6.19067	13.7649	1.59782	3.59537	2.8185	6.96159	16.5314	9.56778	9.40011	12.5493	7.28161	12.0268	10.3597	9.92285	14.4161	0.0242003	2.62914	54.6041	14.4524	24.1198	6.35295	10.4435	23.8456	8.01438	12.008
CCK	0	0.00695286	0	0.0288289	15.9575	0.0251373	0	0	0	0	0	0	0	1.27709	0	0	0	0	0.0136021	0	0.232993	0.0354579	0	0.0173654	0.0145148	0	0	0	0.141253	0	0	0	0	0	0	0.0085122	0	0	0	0	0.0174657	0	0	0	20.606	0	0	0.00942453	0
CCL1	0	0	0	0.0253836	0	0.0885326	0	0	0	0.321299	0	0	0	0	0.0305193	0.0363231	0	0	0	0	0	0	0	0	0	0	0	0	0	0	0	0.131544	0	0	0	0	0.0599383	0.0197659	0.0351152	0	0	0	0	0.179001	0	0	0	0	0
CCL11	0	0.188095	0	0.0278537	0.127287	2.18583	0.183584	0.0300648	0.0509344	0.0220353	0.0210252	0	0.235316	0	0	0	0	0.431927	0.026284	0	0	1.27898	0.0570986	0	0	0.333638	0.111344	0.0565746	0.242622	0	0.0467928	2.09299	0	0	0.0263108	0	0.263084	0.455476	0.732115	0	0	0	0	0.19642	0.662627	0.0163629	0.101244	0	0.548422
CCL13	0.0692185	0.136279	0.394017	2.20727	1.49286	0.461909	0.23277	0.0381197	0.0861076	0.419085	0.0533165	0.0341523	0.0852462	0.250316	0.0212308	0.454828	0.672055	1.02958	0.066652	0.0392399	0.0271831	1.76644	0.126694	0.148912	0.391183	0.264392	0.0235293	0.358661	0.115359	0.223994	0.0593295	0.915086	0.16803	0.107676	0	0.0417108	0.166785	0.137502	0.659556	0.0898055	0	0.0722396	0	0.249045	0.305512	0.207469	0.342318	0.969808	0.434597
CCL14	0.522559	0.407983	0.0227938	0.570008	0.241579	0.296607	1.3836	0.525945	0.582813	0.167284	2.45668	0.897957	0.87657	0.345365	0.630067	0.41441	0.124966	0.690021	3.4095	0.418819	0.750101	1.12323	0.245005	0.437495	2.2311	1.0393	1.05354	0.292553	0.170175	1.10791	0.447902	0.698776	0.874848	1.54869	0.720805	0.846949	0.759818	1.18482	1.79329	0.175339	0.735225	1.43864	0.449701	0.330645	0.278363	0.216037	1.20303	0.318586	0.686359
CCL15	7.24984	9.71094	2.62706	4.45032	8.18775	7.44173	5.33311	25.6192	14.1975	17.9997	20.054	11.1317	49.5023	16.7547	9.91393	12.4057	26.9025	31.9184	28.8331	10.0715	13.2272	16.492	4.34425	6.05769	17.2074	10.8316	20.7935	7.05659	7.78234	7.16857	10.4215	9.90063	26.4355	26.1239	8.33481	19.8982	10.827	23.3503	8.38191	8.27932	13.726	33.9694	16.8857	8.95299	7.76361	10.0841	14.9391	9.38421	13.5609
CCL16	10.6957	208.257	10.6386	19.1543	69.1439	24.4626	78.258	52.5102	24.748	25.9438	37.0731	35.2629	154.323	30.0107	33.1616	57.1242	61.2614	101.12	95.8791	42.8137	56.5322	2.96736	0.335602	104.219	266.783	79.0845	158.626	8.5639	40.6043	6.28473	1.85282	22.1923	72.9072	38.4602	78.6566	115.687	108.18	128.487	26.4501	100.526	138.46	75.0471	103.161	97.2311	1.62743	17.4126	43.889	0.259148	36.9559
CCL17	0.0316693	0.140291	0.0600912	0.993726	0.443042	0.88761	0.212997	0.0523224	0.147737	0.26844	0.109772	0.0703151	0.234015	0.103073	0.029141	0.416192	0.658892	0.0902031	0.0457427	0.511669	0.074622	3.25927	0.124212	0.262792	0.390495	0.544348	0.0968875	0.131278	0.10556	0.614899	0.244303	2.34459	0.276762	0.110845	1.00736	0.171754	0.228926	1.32113	0.771176	0.184898	0.352412	0.0991547	0.137854	0.512751	0.20967	0.170861	0.23493	0.221857	1.15327
CCL18	0.773031	0.217918	0.853407	1.59199	1.69589	2.92633	4.2302	0.41798	0.170474	0.442504	0.292306	1.67474	1.11647	0.991138	0.581986	0.708053	7.38852	0.240197	30.1266	1.0637	0.513327	2.80478	0.661518	1.26996	0.324947	3.20504	0.458661	8.68104	2.83433	0.773209	0.939674	19.213	1.90386	16.7423	0.50804	0.317608	10.6679	0.837609	5.98201	0.164118	0.104269	0.0660085	0.0122361	0.561323	0.341195	0.872038	0.625582	0.337583	1.359
CCL19	0.151622	6.45542	6.2334	0.464157	6.7169	19.5615	4.50391	0.459252	0.660158	1.74419	3.12409	0.0374049	26.2355	0.054831	0	0.359771	0.560808	13.4596	0.219	3.76049	0.029772	224.295	0.198228	0.0465983	0.077898	23.0789	0.180391	14.3248	3.91672	18.7266	6.04313	54.789	0.66252	0.442239	1.05958	0.13705	49.138	100.674	103.219	0.147538	1.73409	1.22635	0.0219998	17.2932	0.613448	2.34045	13.9658	0	162.756
CCL2	3.57899	2.87599	3.75192	1.89919	8.69631	19.6872	3.35797	2.3358	1.88175	0.909861	3.49545	0.248782	3.52495	3.7541	0.691402	2.43617	0.959917	12.1652	5.69779	0.3531	1.00172	19.6178	2.34215	1.61345	2.14861	7.90776	1.90555	2.56143	4.64655	2.28755	5.7201	8.87485	0.892812	0.795897	2.50158	7.62285	4.75257	6.66968	14.288	2.07801	0.421735	0.541706	0.482002	4.26862	10.7893	1.56465	6.91244	6.61931	27.9833
CCL20	7.23702	65.0139	29.8774	11.9277	8.28352	19.142	5.62943	11.5218	7.2159	1.57563	8.47986	1.01712	0.945293	0.396535	1.81616	3.12222	34.3926	8.82821	0.570165	2.85943	0.0516742	52.9013	19.4508	45.2249	0.0450683	0.670133	0	77.9376	7.8946	1.34838	49.9631	26.7504	90.9497	64.4596	0.126832	5.11426	3.83105	14.6202	36.0659	6.06047	0.108461	67.5869	3.80571	17.4221	17.8425	60.8941	25.5414	3.26283	84.6166
CCL21	0.1275	5.91479	1.9354	0.308998	15.6443	67.7546	57.2037	7.26737	3.42993	0.283049	25.3869	0.0471811	39.3735	0.023054	0.156428	0.11636	0.501062	75.4959	3.65248	1.1384	0.0500711	217.495	8.40128	0.0587774	5.53518	105.9	0.823474	9.31516	11.687	61.8892	10.4913	83.8858	1.11424	2.10734	2.61157	3.15007	62.8258	69.8032	101.174	0.0413552	4.21699	3.06049	0.0739994	51.7457	3.18892	0.420372	40.5914	0.0850656	302.038
CCL22	0.0670365	0.113836	0.0381596	0.23087	0.105504	0.339984	0.135259	0.0221508	0.012509	0.0487049	0.0774536	0	0.222909	0.00727274	0	0.0367075	0.0371925	0.0954693	0.0871437	0.039903	0.00789786	0.765631	0.0262928	0.024723	0.0929909	0.230451	0.0546901	0.250095	0.0782059	0.195239	0.258566	1.21415	0.14646	0.101674	0.542779	0.0363563	0.314978	0.359552	0.986535	0.0521847	0.0124329	0.0944491	0	0.0868299	0.288484	0.0723344	0.161619	0.00670883	1.15326
CCL23	0.266057	0.0982162	0.100966	2.138	0.0930507	0.284072	0.223675	0.175826	0.124115	0.289953	0.430361	0.315052	0.0982988	0.259779	0.293779	0.262235	0.110708	0.151561	0.230573	0.135744	0.188072	0.300527	0.166963	0.245304	0.287051	0.487799	0.244188	0.110287	0.354727	0.516582	0.273655	0.633121	0.465021	1.17954	0.192339	0.577169	0.240403	0.396389	0.197178	0	0.345408	0.374853	0.254787	0.0574356	0.381648	0.143542	0.542757	0.319515	0.467731
CCL24	0.159117	1.31575	0	0.487101	2.78247	0.212363	2.6219	0.525768	0	0	0.110305	1.38959	0	0.0690498	0.146414	1.15009	0.353118	0.604278	0.781406	0.351791	3.29933	0.678987	1.64758	0.909573	0	0.546995	0.0649057	2.01172	0.424293	0.411926	0.245491	0.378641	0.834324	0.853944	4.6472	0	1.15019	0.11379	5.72771	0.0619323	0.354125	11.7073	0.0831144	0.0343496	0.14046	0.0286153	0.472144	0.477718	3.31679
CCL25	0.992669	0.820845	0.489722	2.82612	4.06196	0.476948	0	5.47771	1.87084	53.9951	10.3911	0.0587737	940.621	0.0215388	2.8316	0.0652273	0.743502	1.94148	1.46247	3.27516	0.0233901	1.96847	0.0622946	0	0.3366	0.887249	0.668122	0.0822973	0.198525	0.224862	0.918917	5.14435	0.722922	0.972837	0.717626	1.39974	0.143513	1.01751	0.420389	0	0.0368209	1.39859	0.69136	3.94302	0.438137	0.392744	4.12374	0.0397374	0.997214
CCL26	0.111246	0.0205336	0	0.425696	0.534976	0.185592	0.420865	0	0.155689	0.0336772	0	0.1235	0.205509	0	0	0.0304579	0.0385754	0.0264051	0.321365	0.0709486	0.0655321	0.767919	0.261796	0.0512845	0	0.0637386	0.0567236	0.0576431	0.0927014	0.0449997	0.858176	0.808888	0	0	0	0.0502774	0.0502599	0.696118	0.588901	0	0.412645	0.174153	0.0242123	0.0600389	10.7409	0.0750239	0.25789	2.39364	0.908016
CCL27	0	0	0	0	0	0	0	0	0	0	0	0	0	0	0	0	0	0	0	0	0	0	0	0	0	0	0	0	0	0	0	0	0	0	0	0	0	0	0	0	0	0	0	0	0	0	0	0	0
CCL28	0.0260411	0.201877	0.411765	0.611181	0.349125	0.532918	0.357584	0.408725	0.575012	0.252266	0.496448	0.115638	0.681508	0.183637	0.766788	1.36415	2.414	0.646947	0.595544	0.878378	1.63116	3.4263	4.41575	0.296122	0.675641	0.427714	0.774557	0.215894	1.83003	0.400282	0.602658	5.36487	0.214933	0.541811	0	2.82853	1.09807	0.819926	3.56579	0.532133	0.31393	3.11184	0.419412	0.496581	5.76129	0.487832	0.152933	0.655874	0.921062
CCL3	1.13026	0.591901	9.65079	0.613555	6.38911	7.20918	1.83414	0.455982	0.907386	1.06626	1.65515	0.418251	0.558408	0.941046	0.931187	2.72029	2.15103	2.19611	8.6562	1.11757	1.17677	1.18763	4.02069	2.13267	1.25591	1.2801	0.750543	5.28449	3.41692	0.871862	0.844869	4.77807	0.899694	1.27267	1.23514	0.66525	1.90005	1.03386	3.01944	0.741737	1.65748	0.617228	0.5492	1.07813	2.00127	1.83174	1.80364	4.1168	0.379579
CCL4	0.927637	0.363845	9.24079	0.643383	8.1108	4.52666	1.28354	0.4949	0.531912	1.53281	1.04946	0.643632	0.624768	0.503193	0.417898	3.19586	0.897979	1.41283	3.48923	1.15035	1.5938	2.52254	2.96374	1.37201	0.78935	1.66091	0.51241	5.19716	3.31745	2.42338	1.14297	5.83798	0.816304	0.698964	1.04783	0.655066	2.4098	0.679511	3.0589	0.338494	1.02151	0.438681	0.386967	0.730099	1.62068	1.43365	2.1146	2.36924	2.46319
CCL5	7.72673	2.30107	106.521	5.11835	51.5036	11.8203	10.3061	2.48877	1.70836	17.1716	5.32645	0.836155	30.3708	3.32489	2.71251	19.0429	8.10542	9.90046	3.16992	7.45382	3.84017	55.6103	4.15619	2.22701	8.66669	15.7587	4.03911	25.7445	8.61375	13.1744	10.4184	35.9669	4.78538	5.90881	9.74474	4.57784	22.9751	9.86726	12.8964	2.85581	6.11749	6.76967	0.994881	13.0218	5.30184	8.27899	14.3778	4.97752	26.8086
CCL7	0.0682561	0	0.043171	0	0.0397865	0.0607315	0	0	0	0	0	0	0	0.123417	0.0209356	0	0	0	0	0	0	0	0	0	0	0	0.0232021	0.0235782	0	0	0	0.661732	0	0	0	0.0205654	0	0.040677	0	0	0	0	0	0	0.150632	0	0.0421948	0.0683088	0.0857107
CCL8	0.264706	0.229924	5.11132	0.572006	3.59422	1.70409	0.418899	0.385883	0.334136	0.923893	0.377803	0.0921922	0.172588	0.65882	0.114623	1.19368	0.950282	1.24181	0.854637	0.582592	0.605379	1.15301	0.610719	0.459405	0.287994	0.463912	1.19092	2.74319	0.570911	0.0251941	0.280274	2.79959	0.43091	0.345164	0.47278	0.225192	0.450227	0.575327	1.21993	0.545456	0.173272	0.195007	1.30136	0.336142	0.91062	0.812074	0.519789	0.919397	0.918983
CCR1	2.07063	0.674142	1.93718	0.506221	2.42651	2.35093	1.1847	0.415744	0.181114	0.322122	0.357197	0.665131	0.969562	0.678602	0.820345	2.25977	1.33628	1.29013	1.45385	0.764215	2.19385	0.830164	1.65247	1.43184	0.410013	0.749716	0.30794	2.47365	1.36598	0.965541	0.5916	2.95603	0.670202	1.03174	1.06031	0.766846	2.66354	0.861217	2.50433	0.503713	0.360025	1.04673	0.15648	0.473386	4.51406	0.491332	1.04002	5.54752	4.86622
CCR10	0.0299885	0.0387465	1.97734	2.80574	0.0786614	0.0800478	0.0252115	0.0990909	0.0979273	0.0907831	0.0866215	0.027743	0.083098	0.0569351	0.0413916	0.0821048	0.187177	0.0925336	0.0541437	0.102003	0.105992	0.0752752	0.205835	0.11751	0.0462213	0.111682	0.0840999	0.411777	1.33693	0.024261	0.192781	0.396456	0.0545987	0.0787216	0.119237	0.149085	0.054194	0.14744	0.0793746	0.175085	0.083427	0.0469461	0.097903	0.0242769	0.653534	0.222465	0.0278076	0.97538	0.225944
CCR3	0.0110062	0.0121889	0	0.033693	0.288697	0.0146893	0.00925294	0	0.0102687	0.00666371	0	0.0122184	0	0.00597025	0.00506374	1.07878	0.0152658	0.0208991	0	0	0.00648342	0.0138135	0.10792	0.279061	0	0.00630598	0	0.0399204	0.0641999	0	0.0283012	0.0145504	0.00801535	0	0.00795664	0.0348194	0	0.0131182	0.0174789	1.27446	0.0102063	0	0	0.112859	0.248963	0.00494832	0.0204115	0.0991319	0.0414621
CCR4	0.10785	0.0608909	0.0120377	0.271895	0.0221879	0.330216	0.149339	0.146739	0.00591903	0	0	0.0422572	0	0.041296	0.0116752	0.104216	0.0263983	0.096372	0	0.086315	0.0747426	0.27868	0.0398122	0.111136	0	0.072697	0.0194088	0.236681	0.0845844	0.225827	0.0489396	0.452901	0.110884	0.125827	0.0275179	0.0172032	0.630563	0.230625	0.47017	0.0123464	0.011766	0.0297945	0.00552306	0.0410864	0.203008	0.114091	0.282371	0	1.76058
CCR5	0.759305	0.284249	1.28856	0.327387	1.28104	1.76274	0.701288	0.265032	0.0498894	0.388498	0.197701	0.178086	0.977928	0.336467	0.108247	0.977953	0.637838	0.461988	0.108128	0.641126	0.251992	2.04018	0.285229	0.320459	0.214283	0.618865	0.059983	1.8065	0.543611	0.657545	0.549993	2.66507	0.817776	0.829728	0.688085	0.207833	2.29986	0.822158	1.29077	0.187315	0.128923	0.259498	0.0465519	0.288586	1.79369	0.509666	1.06109	0.369243	3.19616
CCR6	0.00929247	0.00686073	0.00881603	0.0675614	0.0162497	0.0310053	0.00781223	0.161201	0.00433493	0	0	0	0	0.00504067	0	0.0101766	0	0	0	0.0671655	0	0.017494	0.00728932	0.00428382	0	0	0	0.173339	0	0.0300708	0.0119473	0.00614244	0.175951	0.130097	0	0.0041997	0.0587753	0.0498403	0.0442721	0	0	0.00727353	0	0	0.0102536	0.0208893	0.0689334	0	0.274216
CCR7	0.0626316	0.323691	0.401087	0.563216	0.438095	0.647827	0.50022	0.155215	0.131479	0.161162	0.162819	0.0927068	0.33264	0.0764421	0.259341	0.291511	0.0542947	0.587207	0.101772	0.858795	0.0184472	2.98706	0.0368477	0.0649645	0.132734	0.906089	0.239515	2.10944	0.234858	0.747375	0.342233	2.24596	0.364897	0.182679	0.282987	0.0990714	3.97562	1.57698	2.31256	0.304723	0.682435	0.196095	0.00681574	0.202811	0.276439	0.436463	0.479133	0.03134	5.27924
CCR8	0.0446927	0.0659942	0	0.0684085	0.0781541	0.178946	0.0250489	0.024613	0	0	0.0172126	0	0	0	0.0548329	0.146836	0	0.0141441	0	0.0506724	0	0.0373949	0.081803	0.0412066	0	0	0	0.355087	0.0496564	0	0.0383076	0.137865	0.0867945	0	0.0215397	0	0.269222	0.0532689	0.0473176	0	0	0.0466433	0.0129695	0	0.147946	0.0535831	0.0552566	0	0.112243
CCR9	0	0	0	0.00534962	0	0.0373167	0	0.0115485	0.00652168	0	0.032305	0.0051733	0	0	0.00643198	0	0	0.00663651	0	0	0.461174	0.0263189	0.0164496	0	0	0.00800987	0	0	0	0.01131	0	0	0	0.0163104	0	0	0.0126321	0.0124971	0.0222017	0	0.025928	0	0.00608539	0.00754494	0.00771302	0	0	0	0.0438877
CCRL2	0.615799	0.440443	0.742453	0.196368	0.684247	0.813308	0.291209	0.296738	0.12568	0.194186	0.192695	0.484235	0.710988	0.173978	0.572539	0.358271	0.587213	0.39586	1.14887	0.261821	0.687712	0.466941	3.14488	0.301625	0.385584	0.543933	0.2682	0.830938	0.737644	0.321746	0.329888	2.06917	0.336346	0.329288	0.278236	0.226125	0.904186	0.252301	1.18169	0.162287	0.321212	0.512132	0.351818	0.180019	2.3853	0.190341	0.356884	11.921	0.660504
CD19	0.0144854	0.00534737	0.852049	0.227263	1.08922	0.0483321	0.0365339	0	0.0135149	0.289418	0.0418409	0.0857649	0.214075	0.0157151	0.013329	0.253819	0.0904124	0.206293	0	0.215559	0.0170659	0.663577	0.323841	0	0.0111632	0.28218	0.014772	1.55368	0.0482827	0.0820319	0.0558717	2.25014	0.0316475	0.02535	0	0.0392798	1.00783	1.32941	0.743805	0	0.389547	0.124721	0.0126107	0.179807	0.0639347	0.221428	0.604439	0.195704	2.71936
CD1A	0.0187357	0.0207491	0.0888753	0.071694	0.0655262	0.0125027	0.0157512	0	0	0.0113436	0.0108235	0.00693311	0.0519164	0.0406524	0.00861996	0.0410367	0.0519737	0.0355763	0.0135307	0.342534	0.0110367	0	0.0220453	0.0518228	0.0288773	0.0644076	0	0.135912	0	0	0.0240884	0.160999	0.0272889	0.0655763	0.0541781	0	0.0507874	0.0558273	0.138853	0	0.017374	0	0.0163109	0.0303345	0.341114	0.0673878	0.0173731	0.00937507	0.211742
CD1B	0.0140753	0.0727434	0.0801216	0.377023	0.123067	0.169069	0.0473326	0.0930176	0.0131322	0	0.032525	0.0312512	0	0	0.0129516	0.0924871	0.370932	0.120271	0.0203301	0.10772	0	1.05992	0	0.0778643	0.0650825	0.096773	0	0.510524	0.0469156	0.11387	0	0.334941	0.287013	0.147793	0.101754	0.0254451	0.508724	0.335524	0.521568	0	0.0261046	0	0.0122537	0.0607705	0.170842	0.0759381	0.130516	0	0.583263
CD1C	0.0684146	0.363681	0.337516	1.52889	0.430692	0.328712	0.644185	0.384305	0.0382984	0	0.474275	0.0708868	0.353876	0.118756	0.113315	0.539455	0.778121	0.2858	0.375504	1.24497	0.290168	8.5178	0.150267	0.454163	0.231984	0.611491	0.125582	1.90009	0.205235	1.6383	0.527764	1.15771	2.01288	2.33071	1.95857	0.222622	1.58254	1.96518	4.76608	0.186401	0.152262	0.471244	0.119121	0.236306	1.87217	1.09502	0.812021	0.027387	4.34704
CD1D	1.05452	6.17703	0.281119	7.31011	1.58496	0.546678	4.76241	0.48955	7.88718	6.81729	5.49784	3.17984	0.933773	0.255282	2.54211	0.639467	5.35498	0.736411	5.48831	3.48308	0.657124	8.01753	1.77062	1.20529	0.322379	5.56252	0.568797	0.59608	2.39654	2.42539	0.403377	2.06235	0.545827	0.427046	0.516627	5.39606	2.69315	1.0751	2.74039	0.220488	0.662695	0.177361	0.751129	1.84375	0.817399	0.15673	19.2495	1.22977	1.79476
CD1E	0.0178257	0.105287	0.0338235	0.477483	0.109101	0.0951635	0.19482	0.0736266	0	0	0.0308935	0.0131927	0.115255	0.0386779	0.0246039	0.175696	0.284334	0.0930829	0.0643678	0.348635	0.0105006	3.14333	0.0489407	0.131482	0.0549494	0.245117	0.0363566	0.637319	0.0891246	0.793163	0.114592	0.47132	0.506288	0.623912	0.966499	0.0966751	0.950307	0.701128	1.92501	0.0173456	0	0.0558111	0	0.0865835	0.462232	0.320574	0.23141	0.0178394	1.73477
CD209	0.61846	0.778546	0.869572	0.408622	2.20191	0.647273	0.793006	0.441059	0.190957	0.231673	0.241616	0.414912	0.739747	0.125504	0.225178	1.59825	1.32067	2.15441	0.604097	0.185391	0.419358	1.4184	3.34014	1.19377	0.253738	0.887141	0.0907474	0.474925	0.763773	0.259169	0.503406	0.647037	0.246262	0.129776	0.759107	0.353913	0.796027	0.214778	1.78535	1.03908	0.313575	0.884595	0.0890911	0.725187	0.304393	0.280057	0.915922	10.0277	1.827
CD22	0.133897	0.0659049	0.145179	0.258625	0.200696	0.740344	0.160811	0.0368695	0.00297441	0.0308831	0.0368342	0.0637049	0.0588931	0.0380452	0.0880051	0.38754	0.19014	0.0756696	0.138141	0.225006	0.176529	0.588173	0.205064	0.279238	0.00491368	0.273986	0.0325108	1.21579	0.138142	0.128957	0.13936	0.552117	0.153233	0.275238	0.0184376	0.069159	0.737439	1.15133	0.617672	0.0310215	0.0886895	0.214602	0.0166526	0.0309699	0.225137	0.106066	0.63262	0.676381	2.48603
CD244	0.0824711	0.0456669	1.13452	0.142013	1.24988	0.174276	0.635561	0.0454181	0.0448848	0.815561	0.182633	0.0508638	0.292006	6.7477	0.0948588	0.413958	0.0953245	0.14355	0.168753	0.15779	0.0728721	0.672794	0.156342	0.158413	0.180076	0.220508	0.0981196	0.598262	0.217623	0.2224	0.759903	0.49063	0.170171	0.2646	0.178862	0.229847	0.298076	0.204785	0.269221	0.120375	0.178447	0.129106	0.0358989	0.0890181	0.0910013	0.185393	0.662769	0.137558	0.319313
CD247	0.457533	0.229993	2.37356	0.584841	1.86404	1.05238	0.752933	0.233207	0.186191	0.33006	0.455523	0.234151	0.692356	0.237626	0.192588	0.655652	0.729126	0.559167	0.267153	0.67465	0.286723	3.45763	0.503993	0.332091	0.457627	0.669303	0.287892	2.10845	0.62462	0.740298	0.387995	1.6087	0.680586	0.57923	0.703751	0.571946	1.66246	1.00944	1.58205	0.284176	3.0151	0.487662	0.0932239	0.462332	0.553194	0.568971	1.1464	0.204588	2.58541
CD28	0.606936	0.154315	0.259309	0.578319	0.435786	0.514993	0.209509	0.192581	0.0787528	0.180085	0.0417964	0.121966	0.178206	0.165705	0.140545	0.633873	0.423705	0.415962	0.313503	0.222165	0.179948	0.62554	0.668433	0.31871	0.136294	0.257929	0.0737813	0.787262	0.636385	0.149581	0.124027	0.573891	0.14636	0.154752	0.104607	0.116261	1.11862	0.28984	0.523429	0.398941	0.104365	0.264277	0.027994	0.29502	0.474565	0.242155	0.201265	1.46823	1.24164
CD320	11.1584	8.65219	40.4635	11.8527	17.5976	10.6342	5.26318	3.77539	5.60765	13.3656	15.7717	5.13112	8.28352	9.64524	7.33965	4.76906	11.9008	18.5601	9.01755	15.472	11.1651	11.8184	9.65944	6.37636	12.427	13.5176	15.8112	15.1828	6.95574	5.94376	23.9697	12.1867	8.80446	13.5315	11.5328	10.3666	5.64121	13.2945	5.46866	12.1165	9.93161	6.88465	15.8176	8.56312	16.1376	22.4785	18.5029	19.7106	20.1407
CD3D	1.31041	1.59167	34.2487	2.58809	18.5169	3.80814	2.27441	0.872978	1.10429	7.88271	2.0757	0.281563	8.39455	3.16432	0.213931	3.07851	5.65792	2.98994	0.366335	3.95398	0.697222	23.7148	1.04451	0.409227	1.85685	6.20014	0.840595	11.8277	1.97257	3.07781	3.64132	23.7785	2.37041	2.8111	2.65863	0.8788	9.35786	4.24475	9.10743	0.699255	1.45036	1.68744	0.220803	2.92013	3.45162	3.24985	3.25336	0.994141	9.31572
CD3E	1.5534	0.795179	11.4625	1.77007	7.71467	4.57032	2.66995	0.684386	0.186801	1.79742	0.749824	0.347455	2.0789	0.681599	0.260466	3.02437	1.4364	2.04511	0.259273	2.07239	0.829658	11.6717	0.942337	0.655645	0.915137	2.76895	0.542125	10.5246	1.54183	3.61934	2.09485	7.13752	1.91061	2.14259	1.35758	0.636529	7.69807	3.83052	7.24371	0.819602	0.71705	0.97272	0.0901575	1.70653	1.59218	2.25972	2.95768	0.656387	10.5595
CD3G	0.194507	0.117153	0.971234	0.219373	0.716073	0.696813	0.387292	0.169134	0.0573078	0.111567	0.0413981	0.0606123	0.13238	0.0555314	0.0376797	0.762368	0.127794	0.291584	0.0591459	0.174104	0.0542741	1.11781	0.148563	0.0755097	0.0552251	0.299136	0.0626384	1.01846	0.0682453	0.37269	0.210592	0.913536	0.231116	0.280677	0.207221	0.0786535	1.59102	0.341647	0.910433	0.0498074	0.123412	0.144234	0.00891234	0.243098	0.31629	0.239336	0.31326	0.0358579	1.60046
CD4	6.76921	4.5581	8.79589	4.53796	14.5794	9.73777	9.60251	2.61189	1.51895	13.0942	4.50456	3.0947	18.5279	2.02653	8.22358	8.4033	5.70475	6.80108	9.72782	12.7182	4.86582	12.8136	7.94819	5.84224	2.81965	11.9691	3.62632	12.4805	5.28376	10.8141	4.97953	19.552	5.02335	6.29307	13.0827	3.74864	15.1751	5.12431	16.3929	2.7765	3.28959	4.80888	13.2148	3.27871	11.4026	3.3439	7.74683	13.1201	21.907
CD40	3.481	6.82097	2.3442	11.2094	7.26934	6.46067	9.30207	7.21457	13.4478	9.02307	0.933661	7.79783	5.58366	10.9923	6.09159	6.62882	4.50491	1.8369	8.91104	7.01692	17.2649	2.4575	11.8001	9.09112	1.70059	11.1208	10.2217	3.36584	4.6489	4.2871	2.6973	22.9893	1.65232	1.08783	19.8736	14.9597	9.08501	10.9327	4.63971	0.680471	3.68915	7.91864	3.44989	10.2236	1.80906	2.04014	8.53072	17.5817	9.76683
CD40LG	0.367413	0.111697	0.266557	0.545837	0.548011	0.923038	0.563263	0.178535	0.0201644	0.104683	0.137341	0.0319907	0.139739	0.328262	0.0397742	0.272193	0.494623	0.164156	0.0312168	0.220538	0.445597	1.32913	0.118675	0.109597	0.11659	0.260041	0.0220401	1.15346	0.126068	0.36718	0.0555744	0.442871	0.629583	0.479088	0.281237	0.0781417	1.58182	0.753475	1.49876	0.315456	0.0601253	0.186086	0.00940774	0.326596	0.286176	0.505279	0.400815	0.0865169	2.34756
CD48	1.0855	0.779298	5.01837	0.931733	4.33129	2.39325	2.35962	0.584592	0.117504	0.820617	0.582052	0.448293	2.06067	0.403395	0.347663	1.30701	1.50562	1.6911	1.30801	1.60642	0.798415	9.25062	0.644509	0.973184	0.70251	2.31595	0.330258	6.07209	1.45927	2.16392	1.17202	6.17631	1.58979	1.79821	1.26599	0.390303	4.93127	2.84136	7.3527	0.350143	0.778593	0.591476	0.271497	0.841535	2.05144	1.46141	1.76843	0.456143	7.50076
CD70	0.0512663	0.0283878	0.607972	0.107897	0.537896	0.119739	0.0430999	0	0	0.217275	0.074041	0.0094855	0.0947056	0.0417138	0	0.266685	0.0355538	0.133852	0	0.0544927	0.060399	0.176942	0.16086	0.0354506	0.0987708	0.161552	0.0130701	0.79692	0.17088	0.0414749	0.230696	0.57609	0.0373352	0.074765	0.0370618	0.0115848	0.115808	0.198588	0.298525	0.0249427	0.0713105	0.0200639	0	0.124506	0.12728	0.207442	0.118845	0.102612	0.337976
CD72	0.527698	0.526608	5.49055	0.37723	4.0562	1.19961	1.05303	0.220354	0.243465	0.547707	0.482399	0.476382	0.910556	0.182444	0.389522	1.25108	1.02953	0.853368	0.644936	1.04538	1.05211	2.16884	0.768752	0.534656	0.60777	1.38215	0.307507	2.14538	0.898788	0.684936	0.536804	2.48387	0.802388	0.778033	0.394063	0.304011	1.39377	0.867411	2.59699	0.440129	0.570007	0.580989	0.222129	0.438145	0.851023	0.563144	0.881853	2.20527	1.62384
CD74	319.556	276.011	568.583	96.7179	1649.24	385.718	1145.85	72.7248	56.3736	453.329	129.063	80.0572	327.225	112.196	58.8043	1627.6	345.799	518.029	144.946	311.792	138.506	529.83	332.316	184.292	108.783	349.368	84.1562	490.423	220.74	225.831	218.766	1034.13	200.497	190.178	759.94	78.723	418.948	304.295	769.797	691.397	938.133	123.106	42.6595	412.931	360.161	172.736	851.522	533.677	437.453
CD79A	0.0391916	0.0964519	10.2871	1.23976	15.4659	0.523067	0.263589	0.0647503	0.0121886	4.69827	0.588663	0.0580111	0.168933	0.113383	0.0841464	5.33647	0.380518	1.02946	0.0566077	2.46616	0.0153911	4.45972	0.0717341	0.0361346	0.0805412	1.70657	0.399669	11.2368	0.522532	2.00807	0.70544	36.0613	0.646945	0.533453	0.264438	0.0590417	8.381	6.66427	6.07187	0.076272	0.314975	0.409021	0.0341195	0.15511	0.245057	2.86625	1.69593	0.483736	16.3554
CD79B	0.471995	0.683018	4.92574	1.69777	5.06782	1.00791	0.968214	0.655036	0.572481	1.90895	1.17794	0.258498	1.02888	0.153619	0.347451	1.54038	1.75451	1.51466	1.34985	1.05959	0.956454	6.27929	0.792332	0.748508	1.92056	1.78483	0.635358	4.34352	0.896752	1.25246	1.40788	5.91542	0.811216	0.726888	1.16014	0.349839	2.90009	3.80858	4.88723	0.679737	2.17095	0.546781	2.83528	0.978172	0.4479	1.12045	0.945365	33.1596	7.88285
CD81	67.1424	62.6825	26.7608	58.519	63.4333	50.7349	25.3436	15.0003	296.205	52.6714	35.3823	34.5567	51.1118	148.2	39.0378	32.5981	20.8732	110.745	71.7948	26.0497	41.6854	33.2087	62.6634	27.5102	77.5125	94.5908	79.6198	10.8455	52.2807	56.4371	71.5414	87.5563	4.75357	11.361	105.74	69.2635	72.6178	91.4067	52.4907	79.2772	125.308	27.088	78.7002	56.6389	41.8169	6.56414	47.7559	56.7314	60.9367
CD8A	0.729423	0.19946	6.68444	0.471405	8.97604	1.06005	0.881234	0.178535	0.186521	2.08057	0.530634	0.115966	0.399254	0.211026	0.198871	3.64502	0.494623	0.974676	0.273147	0.689181	0.0891193	3.14652	0.296688	0.0846886	0.449703	1.43642	0.341621	7.6935	0.729392	1.7747	0.805829	4.57157	0.283312	0.466481	0.734341	0.385825	4.45252	0.615016	2.16806	0.231334	0.661379	0.203002	0.136412	0.309099	0.435225	0.714192	1.63332	0.356882	5.11577
CD8B	0.231743	0.0544405	8.97435	0.18542	6.24453	0.407706	0.425079	0.139227	0.29484	1.97709	0.389462	0.0545722	0.91459	0.0914243	0.116314	1.28051	0.45293	0.550058	0.0608593	0.385168	0.0124103	2.92176	0.0908937	0	0.34095	1.02601	0.193359	3.43864	0.210667	0.630624	0.460472	2.35348	0.0613708	0.184345	0.319837	0.123778	1.9988	0.451986	0.769521	0.102501	0.390729	0.115432	0.0366821	0.21603	0.162727	0.644089	0.683741	0.200297	1.83863
CDC42	29.3652	28.3045	26.9328	40.0611	83.5585	37.0506	24.7746	23.2074	36.8374	25.2762	21.2675	30.5014	24.7696	20.1118	35.2009	45.1162	46.5813	43.0351	22.2832	26.386	45.2048	28.8829	51.7592	23.0394	25.8391	24.7009	33.6747	36.7599	22.4736	29.4652	42.0277	58.6759	17.6616	18.5658	26.322	44.1183	25.5229	22.1507	39.352	39.8159	33.4605	38.8624	18.999	17.5534	80.678	22.2143	24.7247	56.5037	45.0498
CDK4	16.6786	9.10621	9.45526	15.9236	15.618	7.66813	8.55584	11.397	12.6004	6.08662	4.89099	16.7886	2.17542	17.8995	13.1171	7.76506	4.71957	7.16139	5.46082	9.17046	13.3262	11.9016	21.149	13.0461	1.69085	6.05817	9.37966	32.6095	14.9983	6.93961	17.7701	19.9109	18.0819	27.7889	13.4509	20.8964	9.54291	7.92652	2.84132	7.62315	9.4948	1.56212	23.3476	8.59657	38.2162	26.0487	8.81616	14.3841	13.4955
CER1	0	0	0	0.0989437	0	0	0	0	0	0	0	0	0	0	0	0	0	0	0	0	0	0	0.0380305	0	0	0	0	0	0	0	9.22522	0	0	0	0	0	0	0	0	0	0	0	0	0	0.017832	0	0	0	0
CGA	0	0.0444295	0.016312	0.0131586	0	0	0	0.113625	0	0.645411	0	0	0	0	0.0711939	0.00941474	0	0	0.384927	12.9976	0.0202564	0.205001	0.0539487	0.0554834	0	0.0689571	0	0	0.0143273	0.0278194	1.98951	0	0	0	0	0	0	0	0.0455083	0	0	0.0134579	0	0.510357	0	0.0309205	0.0159431	0.00860339	0.0539758
CGB2	0	0	0	0	0	0	0	0	0	0	0	0	0	0	0	0	0	0	0	0	0	0	0	0	0	0	0	0	0	0	0	0	0	0	0	0	0	0	0	0	0	0	0	0	0	0	0	0	0.0287033
CHGA	0.177234	0.0981402	0.024021	0.00968863	0.276722	0.0253439	0	0.0104577	0.100396	0.0306591	0.0511938	0.0702698	0.0116932	0	0	0	0.640908	0.0480773	0.00914263	0.0269126	0.0223722	0.00794431	0.0198612	0.0116721	0.00975608	0.0507731	0.006455	0.36078	0.622402	0	0	0.0753132	0	0.103389	0.0274558	0.0228858	0	0.00754443	0	0.0246372	0	0.00990908	0	0.0409937	0.0349224	8.89042	0.0234778	0.0443427	0
CHGB	0	0	0	0	0.136283	0.0173356	0.00727993	0.0143064	0.0201978	0	0	0.00320436	0	0.00469721	0.003984	0.00948324	0.0240214	0	0	0.0147268	0.00510095	0.016302	0.00679265	0	0.0133466	0.0099227	0.00441531	0.166015	4.19237	0	0.0890662	0.00572391	0	0.0959761	0	0	0.0391218	0.00258024	0.0091679	0	0	0.0271118	4.74557	0.00467337	0.00477748	0.0116796	0	0.688947	0.0271843
CHP2	0.00824307	0	0	0.0252344	0	0.132018	0	0	14.7278	0	0	0	0.0152276	0	4.02763	0	0.331567	0	0.428621	0	0	0	0.963455	0.0076001	0.0635251	0	0	0	2.92617	0	0	0.0108975	0	0.0192342	0	0	0	0.0196497	0.959993	0	0	0.0387128	0	0.0533847	0.027287	0	0	0	0.238073
CHUK	2.35234	3.15337	1.25838	1.84802	3.41474	2.19389	2.55424	2.42082	1.494	1.98363	1.70605	5.25854	2.06806	3.33918	1.87507	3.69354	2.86179	2.41904	1.65791	2.67511	3.14537	2.67846	3.38594	3.47279	1.94388	1.68878	2.71969	6.59372	3.15522	2.30203	2.57986	0.573263	1.9319	2.7147	1.58583	2.72572	3.57498	2.15854	2.57752	2.30553	1.86074	1.98767	2.80045	1.38273	6.39844	5.83848	2.43356	1.85497	3.90768
CIITA	0.309398	0.272479	0.634456	0.65409	3.13466	0.640698	1.47669	0.238394	0.324913	0.433454	0.219616	0.278273	0.574123	0.195678	0.273207	2.67119	0.213609	0.528224	0.156311	0.473101	0.322016	0.769666	1.04482	0.308291	0.228814	0.292535	0.18535	0.999284	0.372279	0.264898	0.271141	2.56975	0.369812	0.265468	0.708128	0.275901	1.27622	0.771439	1.08847	0.882943	0.880034	0.24109	0.0676411	0.232125	1.64729	0.209592	1.13215	0.79978	1.74398
CKLF	5.17511	5.38164	41.717	2.39449	9.28632	5.43976	3.32704	3.35296	2.25639	6.94238	2.59885	2.87882	11.6846	4.91722	2.5366	2.44481	8.35089	7.53065	8.76951	8.13976	2.88911	6.94086	4.96165	4.74026	4.04033	7.05418	3.88051	5.15273	9.72407	2.87324	10.4371	7.26644	6.08432	5.20905	5.72188	4.52488	4.64556	2.76157	5.80136	3.29132	2.22698	6.75123	15.0179	6.5717	7.85645	9.55015	5.01831	17.7884	3.12183
CLCF1	4.38432	1.68089	0.811155	0.129347	1.00834	1.23399	0.334324	2.20098	1.52121	1.36035	0.5169	1.22141	0.936651	0.647145	3.28416	0.370183	0.758421	1.56687	0.344633	1.98668	0.901888	1.23528	6.65225	1.15495	0.153232	2.51769	0.618445	1.45269	2.02141	2.26812	1.32934	0.985745	0.159284	0.150787	0.876834	1.92307	1.79663	2.4647	1.86304	1.16088	0.276576	6.47442	3.01198	1.42722	3.4446	0.40228	0.700625	6.57658	4.26957
CLEC11A	0.574748	1.80592	0.481875	0.736521	1.30892	9.11578	1.16865	1.89913	0.748239	0.776891	2.6408	1.27611	2.00004	0.261017	0.356675	0.409865	2.66966	2.90607	3.78397	0.579663	1.27553	9.71302	2.41153	1.10913	1.23608	5.8968	1.00867	1.21894	4.36612	3.41704	9.07365	5.01842	0.798196	0.405451	1.77795	1.00278	1.57007	5.2732	9.56626	0.520248	1.98317	0.585883	1.08218	3.73667	4.0264	1.24996	4.09008	1.5383	13.1925
CLEC4M	0	0.00356535	0.0183259	0	0.042223	0.00644507	0.121795	0.00797833	0.018022	0	0.697435	0.0428877	0	0	0	0.0105771	0	0.146715	0.01395	0.0123192	0.0398253	0.0484864	0.00757616	0	0.0967594	0.18261	0.024623	0	0.072433	0.523506	0	0.00638415	0.112538	0.0112681	0.00698212	0	0	0.00287787	0	0.009398	0.125387	0.00755975	0.0042041	0.036487	0	0.00434226	0.958265	0.0144984	0.181919
CMA1	0	0.0154714	0.119285	0.0320749	0.109933	0.0279676	0	0	0	0.0507494	0.145269	0.0155088	0.154844	0.0454682	0.0192822	0.022949	0.116261	0.0397908	0.121069	0.0356383	0	0.526003	0	0.0579619	0.226087	0.1921	0.320546	0.0434323	0	0	0	0.0277033	0.152608	0.244482	0.0605962	0.0378825	0.0757385	0.0124882	0.199673	0.081563	0.272051	0	0	0.0226187	0	1.01751	0.0388624	0.0209713	0.342081
CMKLR1	1.03524	0.799995	3.3066	0.261455	3.29478	1.60734	1.02699	0.535914	0.360593	0.208929	0.446547	0.480136	1.39607	0.258318	0.381036	1.7573	1.53641	1.21222	1.41553	0.340387	0.609829	1.98792	1.63768	0.773135	0.340396	1.30095	0.376539	1.60209	0.64412	0.999436	0.780855	3.10218	0.407118	0.628057	1.04277	0.533374	1.8646	0.849329	1.49792	0.282059	0.563199	0.345734	0.156218	0.800817	0.727273	0.313395	1.13274	2.23093	2.99427
CMTM1	0.0938191	0.0692676	0.178018	0.102574	0.187499	0.107327	0.135213	0.155003	0.0125047	0.0162294	0.0154854	0.238063	0	0.145405	0.160325	0.22017	0.0557697	0.0381747	0.058076	0.170955	0.0631613	0.0336426	0.525677	0.148288	0.0206576	0.0614327	0.0546714	0.305567	0.379728	0.0216859	0.0344637	0.124031	0.136649	0.203279	0.0387567	0.121146	0.145325	0.0399365	0.0141899	0.0521669	0.0248573	0.125889	0.0350045	0.0289334	0.221835	0.241032	0.12428	0.362153	0.286112
CMTM2	0.0170591	0.0503796	0.129475	0.0261113	0.0894936	0.0455354	0.0286833	0.0281841	0.0318321	0.0206569	0.01971	0.0378761	0.25211	0.0370145	0.125577	0	0.0946454	0.145767	0.147839	0.145061	0.020098	0.171282	0.120435	0.0314569	0.105172	0.0781919	0.0173965	0.0353571	0.142153	0.165611	0	0.0902101	0.0248469	0.0199027	0	0.107937	0	0.0609978	0.216732	0	0.348023	0.0801163	0.118811	0.0736533	0.0376471	0.0766969	0.0632738	0.324373	0.0856859
CMTM3	2.40859	2.53452	5.4065	1.72457	4.97179	5.81611	2.89125	2.22556	1.46532	0.774246	1.67116	1.00615	6.96088	0.66	1.30808	2.13469	4.39984	3.09422	4.41143	1.27217	1.85765	6.93407	3.59372	2.71866	2.62161	2.98763	1.47501	15.877	4.70731	2.51105	12.4986	6.65567	4.02354	7.82913	3.40169	1.82922	4.44245	3.69576	6.73004	1.38932	2.74012	2.89596	1.56725	2.21787	6.04151	38.6157	4.12148	4.67802	5.40985
CMTM4	0.645872	0.803686	0.179008	2.80658	0.393399	1.17194	0.284713	0.947179	1.31353	0.506747	0.844058	1.94426	0.849049	1.0996	0.35614	1.16563	0.868999	0.420288	0.206143	1.6785	1.25397	1.59997	3.43265	1.93145	0.212518	0.318772	0.552574	1.43141	1.43118	0.426624	3.96227	0.674772	1.17679	0.897467	0.696005	2.87089	0.721298	0.637184	0.548069	1.66652	0.520419	0.870978	0.671793	0.869473	3.07492	4.05446	0.856855	1.973	1.37907
CMTM5	0.00682956	0	0	0	0.0119429	0	0	0	0.00637196	0	0.00789084	0	0	0	0	0.00747939	0	0.0324208	0.019729	0.0522675	0	0	0	0	0	0	0	0	0.0113821	0.0221007	0	0.0180577	0	0	0.00987454	0	0	0.0162802	0	0	0.0126664	0	0	0.00737173	0	0	0	0.0341742	0.0257281
CMTM6	18.3936	11.2314	26.0196	37.3242	11.3208	19.145	12.516	5.47648	21.6902	11.9392	11.0064	6.32905	7.0276	12.2173	13.2896	12.6252	5.60977	26.2035	6.73504	32.871	12.8481	5.9528	16.767	17.3937	7.72186	5.76642	6.52928	44.0758	35.6156	28.7893	15.4225	8.74088	28.9682	29.6927	16.1921	31.627	27.668	12.4041	10.7309	5.60239	5.82588	21.7179	10.0712	7.75134	42.7721	25.0571	25.3653	15.5224	30.1706
CMTM7	1.32959	0.989379	9.45567	0.969488	3.35027	2.59192	1.7339	0.951316	0.73258	0.893743	0.846724	1.05376	1.75994	0.397529	0.390153	1.66821	3.66656	1.72951	1.1568	0.792319	0.770889	3.06809	2.69366	3.06953	0.927829	1.4396	0.309613	4.54047	4.80691	1.26198	10.9701	4.22137	1.41812	4.06127	2.26297	0.955767	2.14736	3.1601	2.24453	1.39565	4.41728	2.82714	3.16722	1.9493	7.33556	2.84768	1.84449	8.83235	3.26689
CMTM8	16.9256	19.5348	10.3138	28.147	16.2027	12.6341	17.9977	22.7963	17.2271	24.4444	18.4929	20.6094	7.4769	18.8342	9.31073	20.0929	14.3594	14.4817	23.1425	22.1436	31.0342	28.5685	27.2886	26.7542	11.3939	15.9836	30.6491	45.3411	68.2903	11.6634	35.6522	13.8413	42.9225	43.9623	16.2501	35.2842	18.5578	25.9145	11.2972	39.8722	16.1607	24.3495	29.907	16.7889	24.8216	23.1749	20.6264	17.8425	21.1488
CNTF	0.124403	0.00765402	0.0393416	0.214219	0.163158	0.24905	0.0348622	0.274043	0.16443	0.0878737	0.0598895	0.115088	0	0.0449881	0.104932	0.158947	0.100654	0.0787411	0	0.25565	0.170992	0.0390336	0.219569	0.124258	0.0159785	0.0475179	0.317161	0.0429736	0.103665	0.0335478	0.133288	0.0274107	0.105698	0.0362851	0.0749454	0.412307	0.0749387	0.0988503	0.0548791	0.201754	0.0961349	0.210979	0.0270758	0.0447597	0.194467	0.139828	0.115356	0.186749	0.507703
CNTFR	0	0	0	0.0213554	2.11447	1.42759	0.0156393	3.38075	0.0347123	0.0563148	2.43949	0.440566	1.40896	0.0100909	27.4478	0	0.748264	0.282588	0.0268692	36.1693	0	0.583686	0.941214	0.120061	0.014336	0.692791	0.0569117	0.115668	1.30212	0.150496	0.406594	9.32076	0.37933	1.89905	0.403448	0.369924	1.68089	2.04539	12.083	3.76511	24.9443	4.12072	0.00809752	0.060238	8.66225	12.7462	0.275995	4.88694	3.16523
CORT	0.121633	0.102632	0.0329704	0.279264	0.455784	0.0231908	0.116865	0	0.502567	0.126245	0.200762	0.10288	0.256795	0.094256	0.207855	0	0.192809	0.0989839	0.175684	0.132981	0.225187	0.130849	0.0954127	0.0320415	0.0267817	0.258846	0.0708793	0.0360142	0.144795	0.0843446	0.0446809	0.206745	0.0506173	0	0.427096	0.172767	0.0628026	0.093197	0	0	0.225585	0	0.105891	0.112533	0.0958667	0.0781222	0.0322248	0.0521685	0.0872783
CR2	0	0.0118704	0.0305069	0.0430663	0.0421728	0.0160935	0.00675834	0	0	0.00486717	0	0.00892433	0.00742523	0	0	0.0528227	0.0111501	0.00381617	0	0.0205076	0	0.030268	0	0.00370592	0	0	0	0.445699	0.0133976	0.0520283	0.0310068	0.0637657	0.0643985	0	0	0.00363315	0.167067	5.55008	0.106388	0	0	0.0377539	0	0.0130156	0.567704	0.0072285	0.0298171	0.0160902	4.12365
CREB1	1.13606	1.17034	0.622563	2.13282	1.88622	1.19875	1.26886	1.87355	1.63966	0.928696	0.656299	2.75004	1.00009	1.6997	2.24168	2.0953	1.10643	0.934532	1.03075	1.06719	1.72983	1.60857	2.63489	2.11002	0.483582	0.773098	1.0728	2.63515	3.12028	0.988762	1.96157	1.49377	1.49938	1.93791	0.99029	2.40223	2.06416	1.15731	1.4568	0.95381	0.7074	1.60511	1.1747	0.818974	2.22203	2.98163	1.17514	1.06101	3.11066
CRH	0	0	0	0	0	0.0169836	0	0	0	0.015409	0.0147026	0.00941788	0	0.0138055	0	0	0.0882509	0	0	0	0	0	0	0.0351979	0.0196133	0	0	0.0131873	0	0	0	0	0.0185345	0	0.0367975	0	0	0.00758354	0	0	0	0	0	0	0	0.0343272	0.0235995	0.012735	0
CRHR1	0	0	0	0.00457445	0	0	0	0	0	0	0	0	0	0	0	0	0	0	0	0	0.00704196	0	0	0	0	0	0	0	0.876614	0	0	0	0	0	0	0	0	0.00712414	0	0	0	0	0	0	0	0	0.011085	0	0
CRHR2	0.0985692	0.0946071	0.0654608	0.335695	0.0344736	0.046044	0.0165735	0.187278	0.0735719	0.0119358	0.108192	0.0291803	0.0364179	0.0641622	0.06349	0.151127	0.0957026	0.0327545	0.00711859	0.0502909	0.284515	0.185567	0.0077321	0.0727046	0.0759623	0.0169426	0.0251298	0.035752	0.00821375	0.0318974	0.380191	0.0390933	0.107676	0.00575	0.0926358	0.124734	0.0445325	0.0440565	0.0730509	0.13428	0.137108	0.277753	0.00858126	0.0851154	0	0.270329	0.0182802	0.0147968	0.0990206
CRIM1	0.824328	2.25125	1.3078	0.87985	7.39071	4.85698	2.92504	3.00167	2.30986	0.447346	0.770858	18.5494	1.20704	5.7786	2.6916	10.2233	0.783911	1.41608	3.30513	1.82392	18.8324	3.56396	7.34866	8.01208	2.00991	1.16574	14.0884	1.17711	7.82021	2.67648	3.06963	1.43239	0.863344	1.56966	1.07626	5.40014	12.2513	2.83745	4.48339	17.8935	4.79614	3.21536	0.878455	0.836203	5.04685	0.979215	2.62803	5.28363	13.7717
CRLF1	0.104095	0.206547	0.308619	0.229041	0.284424	0.27786	0.0656352	0.859904	0.139611	0.220587	0.217992	0.269642	0.0721118	0.0988158	0.149664	0.09975	0.0541436	0.0926539	0.234927	0.188099	0.137969	0.367444	0.357245	0.0839789	0.260718	0.477131	0.451157	0.323626	0.466241	0.242116	1.50565	0.32684	0.0852847	0.0986759	0.33864	0.188182	0.352719	0.205492	0.220418	0.0886301	0.0965299	0.274992	0.209567	0.238763	0.832751	0.216454	0.253378	1.0092	0.383975
CRLF2	0.00976865	0.0072123	0	0.00747615	0	0.169489	0	0.064557	0	0	0	0.00722975	0	0	0	0.0641888	0	0.00927461	0	0.905436	0.0115089	0.0367809	0.0229886	0	0.0150564	0.0335817	0	0	0.0488412	0	0.0502382	0.0387432	0.0284565	0.022794	0	0.00882982	0.0176535	0.815023	0.0206848	0	0.0181174	0	0	0.0632648	0.0323371	0.0175678	0.0905823	0.117314	0.245335
CRLF3	1.18109	1.30963	0.566513	1.70701	1.45881	1.14855	1.24026	1.95858	1.19207	0.898516	0.461637	2.34614	0.697543	1.12416	1.17164	2.45229	0.487195	1.02547	0.488317	1.06034	1.22078	1.13518	2.30415	1.53426	0.622592	0.719468	1.58952	1.78364	3.2709	0.895124	1.79513	1.74137	1.59237	1.7058	1.18712	2.31771	1.77735	0.894875	1.25045	1.24754	0.749164	2.75624	0.619232	0.483399	3.73049	1.55947	1.02598	2.33324	3.18677
CSF1	3.72913	4.39611	3.02563	4.06324	8.78989	5.81864	3.3697	1.92795	5.64662	1.36478	1.22684	1.89895	3.72899	2.84261	3.52145	6.10013	4.12685	4.70006	1.45519	1.56858	3.47121	5.53086	16.0505	5.83066	1.4467	2.60794	1.26394	8.668	4.6748	3.31302	3.09385	7.59383	1.58882	1.43333	5.87383	3.20039	4.46655	6.3388	5.46372	7.39842	4.62424	14.6541	0.574213	2.10842	81.1891	5.95364	4.50303	25.5728	9.88884
CSF1R	5.29089	4.54799	5.16427	0.918953	10.8187	5.84552	4.58909	1.72559	0.697069	0.701605	1.37852	1.85632	2.72517	0.975973	1.13996	9.58066	3.1723	5.2115	2.16929	1.61747	3.63766	8.3388	7.41262	3.6235	1.53931	4.98392	0.68805	3.94635	2.41409	4.47158	2.15641	9.46903	1.76556	2.14359	4.14458	1.28863	6.66134	3.11674	8.22488	2.62612	2.77131	4.06975	0.594021	2.3	11.6384	1.42246	4.18504	18.4142	9.60684
CSF2	0.0498983	0	0	0	0.130886	0.0665963	0	0.0412197	0	0	0	0.0553944	0	0.0541343	0	0.109292	0	0.0236874	0	0	0.0293937	0.0313129	0.0782838	0	0	0.0285892	0	0.0258552	0	0	0.0641542	0.0329834	0.109017	0	0.0721456	0.0225514	0.045087	0.0446051	0.0264145	0	0	0.0390571	0	0.0538595	0.0550594	0	0	0.0499369	0.0313293
CSF2RA	0.574183	0.726728	0.243189	0.184405	0.493072	1.06738	0.232739	2.5071	0.0956626	0.111741	0.106619	0.170739	0.814468	0.105675	0.429279	0.460383	0.476421	0.511072	0.288788	0.287721	0.102678	4.10506	0.840493	0.255244	0.221247	0.422971	0.0627366	0.685351	0.589537	0.895858	0.830504	3.199	0.224011	0.394759	0.496627	0.222428	1.63057	2.34945	1.84	0.249427	0.133113	0.465483	0.0803367	1.09012	1.26714	0.281199	0.323258	1.38013	1.82185
CSF2RB	0.502656	0.460996	0.849449	0.297536	0.81719	0.786169	0.686701	0.700701	0.0512943	0.137901	0.13158	0.345857	0.515066	0.174675	0.249331	1.35901	0.566472	0.555531	0.345997	0.29386	0.286847	0.956157	0.794761	0.510517	0.254212	0.283497	0.172201	1.11914	0.451586	0.393945	0.302936	1.70284	0.297427	0.384854	0.352027	0.25912	1.56127	1.20056	1.08099	0.137564	0.123814	0.350413	0.129913	0.23737	1.26529	0.271896	0.41512	0.770286	2.44096
CSF3	0	0	0	0	0	0.0118043	0.0297428	0	0	0	0.030657	0.0130917	0	0.00959543	0	0.0290585	0	0	0.012775	0	0	0	0	0.0081547	0.0545286	0	0	0.00916577	0	0.0286214	0.022743	0	0	0	0	0	0	0.0316254	0.00936406	0	0	0	0	0.00954672	0.0292782	0	0	0	0.0111064
CSF3R	0.38436	0.218422	1.80338	0.126578	0.904322	0.572053	0.250674	0.0654263	0.18691	0.0423113	0.110349	0.144818	0.232377	0.128888	0.27651	0.377563	0.129241	0.464446	0.191784	2.01452	0.183877	0.377148	0.451344	0.150343	0.136435	0.264263	0.109275	7.43527	0.337757	0.275145	0.161729	1.00395	0.196788	3.44068	0.165035	0.336893	0.454647	0.395646	0.609169	0.140536	0.345625	0.284442	0.0628675	0.108118	0.771119	0.152908	0.540012	0.65042	0.640609
CSH1	0	0	0	0	0	0	0	0	0	0	0	0	0	0	0	0	0	0	0	0	0	0	0	0	0	0	0	0	0	0	0	0	0	0	0	0	0	0	0	0	0	0	0	0	0	0	0	0	0
CSHL1	0	0	0	0	0	0	0	0	0	0	0	0	0	0	0	0	0	0	0	0	0	0	0	0	0	0	0	0	0	0	0	0	0	0	0	0	0	0	0	0.0210304	0	0	0	0	0	0	0	0	0
CSPG5	0.089945	0.468172	0.0426667	0.474974	0.188744	0.35413	0.0378086	0.0743011	0.478335	0.0925776	0.0727454	0.815458	0.290776	0.434234	0.0703496	0.270884	0.898243	0.153713	0.136411	0.565985	0.757672	0.169331	3.01979	0.107808	0.249538	0.0876077	0.298104	0.298276	0.659569	0.138256	0.231284	0.654002	0.0851544	0.0472221	0.071526	1.28862	0.325089	0.806716	0.195217	0.717683	0.366995	0.0492821	0.274066	0.247568	0.387068	0.194107	0.21685	0.0630101	0.0621203
CTF1	0.0707993	0.0696958	0.761251	0.0451535	0.165076	0.456709	0.0396809	0.136466	0.242204	0.0714426	0.109068	0.218326	1.15531	0.0256032	0.0868627	0.0516905	0.0982003	0.190453	0.170435	0.20068	1.83506	0.429479	0.26843	0.0761563	0.0727485	0.283951	0.0842331	1.05164	0.235987	0.210017	1.66882	0.748787	0	0.0413005	0.136487	0.0853266	0.106621	1.04075	0.324816	0.11482	0.175076	0.055417	0.0924548	0.394835	0.169265	1.31568	0.393902	2.102	0.859408
CTGF	1.77126	21.0106	1.2902	12.5086	16.4265	74.3483	14.4535	33.2165	16.612	3.08002	15.6737	4.03833	10.4366	1.87609	9.84865	15.0679	40.9037	36.3275	24.0682	13.6342	6.31974	166.329	16.8247	15.0462	2.40658	15.8912	25.0913	58.2428	36.8368	31.3623	134.955	28.1775	2.87333	34.2102	8.44761	10.2739	18.3713	37.1203	31.2312	3.05502	2.10182	4.2447	9.96838	37.3767	38.9597	22.1091	126.959	7.42656	72.0499
CTLA4	0.0926179	0.246171	1.81011	0.40403	1.05275	0.506807	0.171302	0.122415	0.0172824	0.852351	0.0963092	0.185075	0.239534	0.0200961	0.0170448	0.841873	0.346851	0.342942	0.093643	0.472544	0.0109117	0.476591	0.326937	0.13663	0.185577	0.520041	0.01889	2.22676	0.586555	0.329686	0.381052	2.88966	0.2698	0.0972509	0.160694	0.025115	1.00425	0.452601	0.882518	0.126173	0.137419	0.434971	0.0161263	0.319905	0.623405	0.408078	0.206117	0.0926894	0.674554
CTSB	80.6837	261.419	129.119	31.0434	130.104	222.381	138.125	170.515	62.2016	6.77305	38.247	127.789	98.3375	88.6659	104.423	191.873	75.4331	127.053	250.09	42.0179	220.363	90.9922	64.9229	258.013	36.7007	81.5873	53.9538	125.373	96.5276	88.4148	45.0992	175.104	165.017	190.437	44.5217	281.482	232.616	64.6649	79.5034	121.113	33.3028	54.0397	81.8264	90.2959	452.035	29.1479	199.14	231.725	73.3211
CTSE	0.00735118	0.0108549	0	0.0900162	0.012855	0.0784894	0	0	0	0	0.0849351	0.0326435	0	0.0239257	0	85.2402	0.0101963	0.034897	0	0.35631	0.0259822	0.00922622	0.34599	0.874333	0.0339911	0	0.0074966	0.0685631	0.110263	0.142732	3.79946	23.9462	0.321214	0.0171531	0	0.0132894	0.0265694	0.420567	0.0233488	0.042919	0.0545352	0	0	0	18.5754	0	0.0272662	0.0441411	0.184621
CTSG	0	0.0527537	0.0813461	0	0.199917	0.15258	0	0.0472196	0	0.0865215	0.429287	0	0.52798	0	0.0131495	0.0626005	0.237853	0.0271353	0.165126	0.0243036	0.0336722	1.02232	0.0448394	0.0131757	0.264309	0.720515	0.7578	0.0296187	0	0.0693664	0.0367463	0.0377845	1.12397	1.41716	0.22728	0	0.0516499	0.0510978	0.423632	0.250299	2.27931	0.0223711	0	0.215948	0.0630739	2.59566	0.0530045	0.0143014	0.933128
CTSS	17.1597	21.8342	12.3542	18.0694	15.4218	28.9638	27.5407	4.35805	6.287	11.337	7.82318	11.6	10.089	17.7499	15.059	47.3397	15.8007	22.9145	8.77376	14.2324	5.44946	39.646	47.3983	8.752	3.45724	17.3058	5.29474	24.4677	9.26446	12.6388	15.0346	44.2292	19.6634	11.1722	26.0593	14.6038	24.4809	21.9498	29.958	4.77201	8.48384	4.97274	1.67381	25.8706	123.052	7.65439	37.6371	21.0351	20.0725
CX3CL1	8.58518	1.61128	8.96075	1.1654	5.48063	2.36521	4.05577	2.98753	2.51689	0.635831	4.36433	1.42088	2.81909	10.407	3.41539	5.02449	2.02561	3.37444	8.33796	1.76928	30.0189	4.14359	8.7425	3.06515	7.17257	1.69227	9.66867	12.9917	3.02459	4.25332	11.9662	17.5063	4.99511	11.3985	8.51252	4.49112	5.92479	2.31759	10.0241	7.53643	5.5692	0.822008	8.02552	1.69677	4.28393	11.6002	2.29452	1.35314	5.44388
CX3CR1	0.252488	0.222111	0.336379	0.534479	0.544862	0.35849	0.460667	0.150883	0.115279	0.0195153	0.0806895	0.159035	0.0793921	0.122391	0.148296	0.382411	0.141573	0.193815	0.0465561	0.173589	0.132911	0.465221	0.471973	0.188216	0.0662399	0.0800264	0.191743	0.573419	0.232781	0.286841	0.138138	0.177551	0.446	0.4638	0.466035	0.606974	0.291246	0.300939	0.392445	0.177731	0.14945	0	0.102891	0.179755	1.18555	0.313985	0.468252	0.188168	0.883708
CXCL1	0	0.0223715	0.0574947	0.231899	0.0264936	2.72975	0.152845	0.0750923	5.6824	0	0.0875238	0.0336384	0.139939	0.0328732	0.125468	0.215696	0.693464	19.318	0	0.0386495	0.0535482	16.4098	24.5891	0.0139687	0.0934055	1.89234	0.0309003	0.98914	0.681742	3.0397	21.8164	1.3019	0.022067	0.159083	0.0219053	4.27265	0.0273792	9.14624	3.4647	1.26784	0.0280987	0.332046	0.0263794	4.23547	16.3664	1.98898	2.1073	211.876	12.2139
CXCL10	47.9187	0.77661	4.56202	27.5496	45.6934	7.33134	121.446	5.71008	48.4311	15.1836	7.87071	8.73637	10.4869	212.747	3.59505	49.26	3.47375	42.7053	1.85693	7.76617	6.62905	293.016	5.06863	5.21859	5.71298	14.8468	6.82771	40.4019	18.4209	7.29408	14.125	105.333	25.6319	10.8501	53.9783	41.2006	14.5736	16.9252	3.64147	11.6001	26.9094	8.83455	1.67159	14.5256	15.8257	7.92701	6.87409	1.55397	20.421
CXCL11	0.627743	0.197544	1.11301	0.921471	2.30344	0.398304	11.7489	0.476057	0.748906	1.47043	0.1189	0.883484	0.570318	1.63002	0.198855	11.3264	0.0856422	2.56962	0.104048	0.708816	0.472841	3.34518	0.41977	0.294133	0.158613	0.589615	0.587689	2.09026	1.61217	0.216461	0.608625	10.6389	0.374722	0.1921	8.40669	2.9952	1.26461	0.607148	0.468497	2.00274	1.73682	0.225541	0.0627133	0.433205	2.12344	0.45342	0.343529	0.0205976	0.5169
CXCL12	0.429727	3.25144	0.90735	0.521756	9.68429	8.35286	3.48236	4.5908	0.419022	0.83727	5.38316	0.78673	2.97842	0.115676	0.891926	16.7653	0.591561	9.04336	3.19679	0.500045	2.20784	9.05113	1.15828	7.95098	0.901377	7.76402	2.24386	25.7523	4.92712	7.81567	4.43662	3.22926	5.82141	10.8565	1.33608	0.753491	4.4785	7.28233	10.519	1.04381	4.74	0.303485	0.143457	2.70632	4.67401	35.8778	19.0429	0.646706	35.9273
CXCL13	0.439077	9.21874	0.676918	231.36	2.71135	0.0732513	0.346064	0	0.729703	0.996902	20.435	0.010155	0	0.014886	0.17676	0.420749	0.133221	0.807688	0	7.24568	0.0484965	0.671619	0	0.0126509	0	1.19495	0	8.7023	0.960441	0.732637	0.846782	8.63451	0.0199852	0.0160084	0.0595164	2.40608	9.96811	19.7558	0.290541	14.6333	0.661645	0.279241	0.0358362	0.0444313	2.2862	0.777291	0.407146	0.0274635	8.71838
CXCL14	0.0198835	0.0146802	0.132048	0.0989124	0.382474	0.451135	0.083581	0	0.00927564	0.0120385	0.287167	0.0220736	0.330583	0	0	0.0217754	0.455053	0.934458	0	0.202895	0.070277	5.52757	0.0857852	0.109996	0	0.729105	0.0811075	0.360598	1.4415	1.96249	1.68724	0.446871	0	0	0.172492	0.0179726	1.85053	3.00978	4.07344	0.0580439	40.6567	0.031127	0.0346205	0.364854	0.0109701	0.116214	1.01406	0.318382	15.8174
CXCL16	6.99945	10.2421	7.33396	4.8405	11.306	41.8502	8.75581	77.6862	6.54358	15.6238	12.082	12.3733	40.3097	4.7041	2.86467	9.92813	23.7057	31.1856	6.62826	148.632	8.36226	62.984	25.7275	9.12947	1.88469	6.05576	3.48296	25.0672	14.6401	20.9221	9.52323	19.8261	12.0373	41.1425	6.99064	5.77411	13.5381	21.1831	18.1841	3.46016	4.54873	87.9013	11.2878	20.8372	17.1993	7.2733	22.534	11.6818	36.6841
CXCL17	0	0.195078	144.921	1.92104	1.38613	0.0881603	0.388732	0.0272833	0.200296	0.0599902	0.0572401	0.0488874	1.15925	0	0.0151955	0	3.1151	0.0627148	0.0238524	0.631914	0.0194557	0.165808	0.0259081	0	0.0254528	0.0756929	0.0336811	3.55962	0.440351	0.0801593	0.552029	1.00426	0.144317	0.809197	0.0716299	0.164194	0.149216	4.61561	0.541997	0.0642763	0.091882	0.12926	0.0575067	1.35469	0.0546658	0.148491	4.83888	0.132213	0.0622106
CXCL2	8.29906	30.762	14.6046	1.37247	0.640933	30.1889	73.4903	13.9491	6.10646	5.81722	1.58803	0.329387	108.744	1.00829	44.8434	25.9043	7.73452	30.5231	26.9613	10.53	9.25313	8.80585	35.7232	5.38276	21.951	86.294	3.59087	3.22855	7.91911	51.8907	4.5777	7.92583	1.29648	1.08431	26.4399	4.93393	7.04939	17.3259	36.809	4.4581	0.776873	2.37707	0.353273	10.3567	6.22533	5.21429	13.7888	19.8598	50.167
CXCL3	0.0176972	0.182924	0.0167898	0.209932	0.0464205	0.177145	0.610002	0.0292383	0.280694	0.0107148	0.051118	0.0261952	0.0326924	0.00959975	0.0651372	0.135667	0.0859124	0.142818	0.0255615	0.0150487	0.0208498	0.388695	0.694112	0.0489503	0.0272766	0.0709771	0	0.0733592	0.235952	0.085903	0.295792	0.187169	0.115993	0.0309707	0.0895562	0.215951	0.0479723	0.216204	0.140524	0.223866	0.0328219	0.0415565	0	0.0382041	1.3767	0.167088	0.180511	3.60415	1.14447
CXCL5	0.0154728	0	0.0733974	0.106575	0.0135287	0.268458	1.88617	0	0.0505263	0	0.0089386	0.0114514	0	0	0	0	0.697488	0.220354	0	0.0592077	0.00911459	0.0194194	3.14358	0.00713296	0	0.00886514	0	6.83078	1.32803	0.0500706	4.09803	0.235238	0.0901459	0.009026	0.0111857	0.265729	0	0.221303	0.0163816	1.20448	0	0	0.00673517	0.00835056	49.7342	0.201739	0.0717377	60.3905	0.126292
CXCL6	0.017989	0.371881	0	0.0137674	0	1.6326	0.0151235	0	0.0167837	0	0	0	0.0166158	0	0	0.0197006	0.0249512	9.82909	0	0	0	0	1.24884	0.0331717	0	0.391658	0	0.652479	1.19922	0.727664	1.66525	0.451856	0	0	0.0520189	2.21138	0.0487634	14.2207	0.609457	3.9385	0	0	0	0.621346	3.15609	1.30213	0.183488	54.1527	1.0391
CXCL9	6.28463	0.703673	18.3971	1.06944	26.7042	4.5812	4.67505	36.9744	10.985	6.92457	3.91626	7.20225	0.489808	3.56845	2.16941	40.4638	0.805099	17.6486	1.50083	20.3345	1.32549	21.7742	2.23727	1.53285	1.95497	5.69884	1.87811	38.4013	10.5934	8.39465	13.3041	95.7034	6.8992	1.30425	2.36232	2.92776	30.1739	4.15101	4.74184	4.83929	5.87439	2.6475	0.59267	1.63981	2.79917	5.34823	3.53509	0.645443	5.35416
CXCR3	0.609652	0.287141	4.08865	0.973381	3.47401	1.50107	0.795317	0.31259	0.205946	0.916424	0.279326	0.132249	0.679619	0.467546	0.0580325	1.45043	0.277008	0.608758	0.106276	1.09046	0.160989	4.35346	0.33806	0.184136	0.226813	1.12017	0.182226	3.45306	1.20874	0.748325	0.729772	6.11429	0.719563	0.539588	0.683896	0.247027	4.53991	1.29668	1.54687	0.572775	0.7213	0.575925	0.0366036	0.635358	0.881481	1.22871	0.9162	0.136752	2.90383
CXCR4	5.10298	5.51449	4.28852	3.41217	10.4829	15.6126	10.896	6.46172	1.63095	4.16937	1.6015	8.57924	7.81223	1.36968	2.52652	8.58583	4.04105	8.21454	11.1325	4.48195	5.46076	22.9368	15.0768	9.8006	7.10318	9.92456	3.03412	15.0048	17.7596	17.4277	13.8937	33.6963	6.91823	2.44118	4.08479	3.23198	19.5287	6.59782	39.707	1.47763	6.41863	7.25604	8.39321	3.80229	19.9805	6.01752	5.64877	8.15517	35.288
CXCR5	0	0	0	0.0406962	0	0.00591416	0.0074508	0	0	0.00536586	0	0	0.016372	0	0	0	0.00614629	0	0	0.00376813	0	0	0.0139042	0	0	0	0	0.0367376	0	0	0	0.00585826	0.00645425	0	0	0	0.024024	0.0501753	0.0140746	0	0.00821844	0	0.00385779	0	0.00977923	0.00796913	0.0246541	0	0.189192
CXCR6	0.380301	0.38463	1.62114	0.733611	1.93133	1.25848	0.297822	0.215176	0.0291633	0.611908	0.186594	0.123379	0.606302	0.0678223	0.201335	1.1867	0.708133	0.321499	0.0752466	0.389838	0.270057	1.52999	0.294234	0.235359	0.232857	0.674574	0.148754	1.47927	0.442797	1.28124	0.442067	1.86644	0.371807	0.528786	0.369084	0.0753428	1.14858	0.409813	1.3458	0.182494	0.183577	0.17942	0.0136062	0.23055	0.3679	0.299804	0.830886	0.198118	2.78682
CYR61	1.38365	26.1177	1.83627	3.61751	10.1399	55.9552	10.5969	2.94668	2.15654	2.12096	15.2658	14.6975	4.03353	21.7097	4.9897	13.5414	10.572	20.9124	24.7446	3.86979	19.458	45.4821	12.1588	16.2525	13.8681	13.2066	20.3089	8.5039	24.9392	14.3643	11.1262	16.5581	3.32002	3.65781	6.92676	7.24376	14.1934	13.1694	23.9043	18.2111	5.14718	9.35285	23.5276	4.26464	11.4816	10.3489	16.8499	2.38523	39.2088
CYSLTR1	0.183274	0.0962805	0.0668758	0.107895	0.277348	0.192861	0.160006	0.163044	0.0164417	0.0938924	0.0814438	0.0652118	0.0911527	0.0420607	0.123239	0.239311	0.0879942	0.16062	0.111996	0.0809203	0.22838	0.234445	0.185237	0.165729	0.0760523	0.165588	0.097044	0.292199	0.0587392	0.142568	0.0725031	0.256271	0.10267	0.135696	0.19874	0.0923874	0.382159	0.161732	0.414197	0.048014	0.0915137	0.0551749	0.0797775	0.110325	0.143895	0.0443688	0.137264	0.179888	0.477986
CYSLTR2	0.0146202	0.0539714	0.020806	1.22801	0.115049	0.263422	0.264263	0.265703	0.0170508	0.300963	0.0211152	0.224523	0.182307	0.00396535	0.0571754	0.0880625	0.015209	0.0555234	0.242848	0.043513	0.047368	0.110096	0.146225	0.0539194	0.00563354	0.0293183	0.0335463	0.178026	0.152288	0.0946233	0.197371	0.0676492	0.0851788	0.0298503	0.0951242	0.142063	0.171737	0.189505	0.208966	0	0.108461	0.0171656	0.0381844	0.0433974	0.189556	0.049299	0.122013	0.0402367	0.215718
DEFA1	0	0	0	0	0	0	0	0	0	0	0	0	0	0	0	0	0	0	0	0	0	0	0	0	0	0	0	0	0	0	0	0	0	0	0	0	0	0	0	0	0	0	0	0	0	0	0	0	0
DEFA3	0	0	0	0	0.0521819	0	0	0	0	0	0.0689549	0	0	0	0	0	0.0413894	0	0	0	0	0.0374517	0	0	0.275958	0.102582	0.0304307	0	0	0	0.153463	0.0394498	0	0	0	0	0	0	0.126372	0	0	0	0.0259785	0	0	0	0.166022	0.119454	0.0749426
DEFA5	0	0	0	0	0	0	0	0	0	0	0	0	0	0	0	0	0	0	0	0	0	0	0	0	0	0	0	0	0	0	0	0	0	0	0	0	0	0	0	0	0	0	0	0	0	0	0	0	0
DEFB1	42.5151	968.884	2.02651	21.1259	0.574656	99.9433	31.6331	1018.39	87.2279	0.945075	0.759369	0.212809	319.697	0.0891291	500.294	53.7581	35.2108	366.794	211.695	48.6226	0.0967901	3368.34	2.93225	2.42389	3.10231	229.987	472.435	61.8103	142.806	10.9001	2181.71	356.514	16.9319	2.58793	15.2043	347.756	377.253	934.595	415.764	37.7326	0.304736	37.8758	0.250329	49.925	317.237	63.309	383.186	206.532	300.877
DEFB104A	0	0	0	0	0	0	0	0	0	0	0	0	0	0	0	0	0	0	0	0	0	0	0	0	0	0	0	0	0	0	0	0	0	0	0	0	0	0	0	0	0	0	0	0	0	0	0	0	0
DKK1	0	0.026286	0.287108	0.0204357	5.0274	0.736514	2.91833	0.74997	0.0830435	0.0107779	0.0514192	0.0988109	0.0493276	0.00965632	0.00819014	13.7052	14.506	0.0507034	0.154273	15.9246	0.0209726	25.8274	0.0488742	0.0738581	0.342967	0.061196	9.87556	36.905	22.2805	0.302432	1.30458	0.0353009	0.622276	19.1696	0.0900839	0.0965436	0.016085	3.56983	0.310975	47.3063	0.973952	77.2072	0.154976	0.240183	8.26957	49.4213	0.346644	0.347396	0.681788
EBI3	0.565806	2.03225	5.48402	0.42132	5.85633	1.69398	1.97984	0.707412	0.285349	0.981412	0.653729	0.667738	1.52547	0.165902	0.422136	2.36134	2.4392	1.4809	0.552189	2.82177	1.62146	5.18199	2.95092	1.17024	0.259266	2.75113	0.327486	1.79075	1.50365	1.75674	1.10101	5.6404	0.757289	0.999102	1.1055	0.207336	2.40426	1.24851	3.83708	1.16065	1.3897	1.12514	0.0798779	1.27096	0.995551	1.32005	1.58815	6.97856	2.57315
EDN1	0.347693	0.663155	0.109955	0.317838	0.354673	0.915199	0.779486	0.367003	0.540661	0.210512	0.368246	0.478913	0.0535252	2.71381	0.186629	1.94619	0.321506	0.550181	0.781203	0.254596	0.944429	0.812148	2.07587	0.658955	2.08405	0.586564	0.502309	0.140124	3.10657	0.843861	1.31625	1.83863	0.351682	0.721156	0.474784	0.724584	1.01232	1.88212	0.296536	3.08254	0.37616	0.362868	0.227021	0.552517	3.01596	0.208428	0.734371	3.82758	2.28005
EDN2	0.0119799	0.00884485	0	0.0733475	0.0209492	0.175877	0.0201431	0	0.0894174	0.942921	0.166098	0.0265988	0.110654	0.142965	0.0771642	0.052479	0	0.22748	0.190339	0.122245	0.042342	0.0751777	0.0281922	0.0441817	0.0738581	1.16686	0.0610842	0.0124149	0.239587	0.755962	0.154025	0.47513	0.0174489	0	0.15589	0.184085	0.108247	0.0642542	0.177569	0.139886	0.177747	0.675147	0.0104294	0.0258618	0.0925327	0	0.199955	0.167848	0.075217
EDN3	0	0.00541933	0	0.0112352	0.0256716	0	0	0.0242541	0	0	0	0	0	0	0	0	0	0.00696896	0	0.00624171	0.0691823	0.0921242	0	0	0	0.0841111	0.0748539	0	0	0.0475062	0.434114	0	0	0	0	0	0.0397946	0.00437436	0.0233139	0	0.0272268	0.114908	0	0	0	0	0	0.00734585	0.0645207
EDNRA	0.189956	0.47205	0.0703285	0.769437	0.251158	1.65718	0.849122	0.796071	0.315554	0.319782	0.310476	0.442332	0.470735	0.0552903	0.110843	0.111626	0.064262	0.290319	0.916796	0.086674	0.403924	0.66289	1.49371	0.858611	0.37133	0.286688	0.363804	0.955464	0.84164	0.472274	2.54949	0.66763	0.14846	0.156756	0.422021	0.778932	0.795406	0.734444	1.604	0.117215	0.678824	0.108794	0.298477	0.360063	1.53369	0.329116	0.360876	0.333839	2.82748
EDNRB	0.975092	3.50419	0.408678	2.75726	2.3557	3.2352	2.95642	5.6676	0.895144	0.929421	1.14019	5.64288	1.08513	0.675507	8.2734	3.53813	0.890788	2.95951	5.66756	1.91474	4.91353	2.96859	5.99936	6.9287	2.72817	3.08283	4.49668	2.13463	5.26032	5.33509	1.71185	1.80163	1.00387	0.904623	2.14024	2.56626	3.6729	2.15405	8.30865	1.21938	9.14392	0.165521	5.31839	1.29343	13.2787	1.07046	2.20053	0.936655	12.5149
EGF	0	0	0	0.0392416	0.134496	0	0.00538836	0	4.44007	0.0116416	0	0.239548	0.0769609	0.00347672	0	0.0175479	0.00444495	0.015213	0	0.168955	0.00377556	0	2.40575	0.759358	0	0	0.00326806	0	0.00534088	0	0	0	0	0.00747772	0.0370678	0.00289668	0.00579133	0	0.145894	0.0124734	0	0.0100336	0	0.214462	0.597606	0	0.00594321	1.92428	0.00402418
EGFR	3.70249	7.37419	0.70713	17.4421	0.129809	8.42317	4.18508	9.24816	8.52295	5.29234	3.31164	5.46918	7.60371	8.16837	28.8318	7.18047	2.27775	4.58102	2.70016	11.6042	0.0124936	2.32914	23.091	7.11232	3.82699	6.45255	1.85851	4.1054	4.13558	7.60602	4.90442	6.39486	9.24093	11.4955	5.71028	8.45427	5.89977	2.87366	5.34742	3.52905	8.95998	4.60797	0.100234	3.38648	4.81761	8.40212	7.61659	3.10042	4.68164
ENG	16.5762	14.2978	5.67132	8.63436	8.58611	27.1779	20.0184	19.9668	6.46183	8.41076	26.1107	4.22474	14.131	6.13883	12.7872	12.8582	6.94178	18.7557	42.9839	8.77047	14.738	34.6884	12.9168	11.957	23.7723	25.6731	19.0413	11.6348	12.8732	19.5867	24.7379	27.2047	6.71545	11.7189	18.3033	6.03926	21.1639	22.927	52.623	7.60361	16.2692	2.35124	8.1147	17.542	13.853	3.29781	31.0005	74.7455	60.6597
EPGN	0	0	0	0	0	0	0	0	0	0.013107	0.0125062	0	0	0	0	0	0	0	0	0	0	0	0.00849082	0	0	0	0	0	0	0	0	0	0	0	0.0156501	0	0	0.00645061	0.0114599	0	0	0	0	0	0.54941	0.0194659	0.0200739	0.0108325	0.0135921
EPO	0.0295263	0.152597	16.0791	0.0903884	0.438878	0.531994	0	0	0.482089	0.0893839	0.136458	0.0109262	0.845444	4.24435	0.0271691	0	0.143338	0.981156	0	2.44799	0	0.0926437	0.926457	0.108893	0.0910177	0.152254	0	2.1419	0.123021	0.0716612	1.48052	1.75655	0.172023	0.430601	0.064036	2.53542	0.0533586	0.40471	0.0468907	0.028731	0	10.5387	0	0.0796756	5.34316	58.0379	2.79266	0.472786	0.185384
EPOR	0.682346	1.15823	0.59291	2.39145	1.7954	1.02133	0.729128	1.6752	3.34973	3.52896	1.88622	4.09193	1.56681	1.88873	3.54425	1.1663	0.60147	1.31384	1.83297	3.8664	1.16453	2.14498	2.36113	0.787873	1.62178	1.59303	0.942967	0.627821	1.90241	1.68187	3.72234	3.54087	3.41811	2.4329	1.76108	3.27982	1.74018	1.58476	1.76217	0.632941	1.58484	10.2427	1.57115	0.825998	1.75917	2.36249	2.19975	13.8489	2.40235
ERAP1	4.54237	3.47775	5.53807	10.7771	11.8976	17.2868	15.1671	6.83095	8.90491	3.81256	1.79034	14.9689	5.97157	14.7893	5.60784	35.274	4.29852	4.72326	4.35848	2.99466	12.4617	5.12095	29.8257	25.4656	4.73853	4.9389	13.0095	3.51384	2.02643	3.21897	4.22598	3.60373	5.74495	5.85314	7.21078	4.80724	19.3027	1.63628	7.01488	6.6661	15.1439	4.41435	9.11601	12.1267	15.4756	5.64002	7.87406	4.766	9.77556
ERAP2	4.21959	0.189461	0.416639	0.939445	23.0061	0.48019	6.91694	6.44689	4.55146	3.13619	3.6771	2.58056	0.552245	7.90424	6.67001	1.10674	18.457	3.8379	0.2713	2.29685	18.6041	0.680661	11.1502	21.6061	9.76567	2.72228	11.7033	5.0966	5.77138	0.316756	3.22446	2.95533	0.335232	2.36734	6.73204	5.05512	0.645415	0.280632	3.17061	0.38099	18.4533	0.604654	0.145097	2.9212	13.0165	4.5721	0.358155	5.24216	5.35179
EREG	0	0.00253572	0	0.00525698	0	0.073341	0	0	0.00961312	0	0	0.00508371	0	0	0.0031603	0	0.0142912	0.0195648	0.00496072	0	0.00404632	0.00431052	0.00269413	0.00949979	0	0.0157423	0	0.00711842	0	0	0	0.0317834	0.335162	0	0.0446919	0.037253	0	0.00204677	0	0	0.00636976	0.0483893	0.00299001	0.0481928	0.712469	0.00308827	0.0127389	3.5437	0.00431277
ESM1	1.33329	0.209786	1.31331	3.39573	6.91811	0.447295	4.94911	2.51575	1.61782	1.60566	0.563997	5.83968	0.349936	7.47738	4.19004	10.3168	5.52769	0.172931	9.18689	1.86481	6.63513	0.411483	3.86916	8.12136	4.28965	0.626152	3.07595	3.42028	1.9792	1.08453	1.70484	2.71619	2.78029	5.66962	7.95322	3.52983	0.315994	0.703387	0.794503	2.25445	10.6883	2.50922	23.6777	0.180874	6.28672	4.81517	1.1485	1.50202	0.384251
ESR1	0.345763	0.549916	0.00820087	0.0628471	0.080618	0.323028	0.167144	0.11663	0.223129	0.0209343	2.29042	0.905238	0.141054	0.253203	0.876262	0.179864	0.0179843	1.10246	0.09364	0.0918807	0.147667	0.0904073	0.09832	0.0611019	2.69792	0.254234	0.30265	0.0388178	0.0744318	1.67602	0.0592729	0.114277	0.0125903	0.0218507	0.418684	0.656318	0.393133	0.0497969	0.10372	0.260748	0.162988	0.119533	0.0464064	0.202156	0.0635876	0.023318	0.245806	0.0533462	0.320209
ESR2	0.0126175	0.0139735	0	0.0321882	0.0294191	0.0140332	0.0141435	0.00347434	0.0196202	0.0152786	0.0364456	0.0124509	0.00388479	0.0387846	0.0425708	0.0299392	0.0175008	0.0119794	0.0182246	0.0214586	0.0322081	0.0184752	0.0131968	0.00969446	0.0551009	0.045785	0.0128671	0.0239722	0.0665897	0.023818	0.0378522	0.0500421	0.00918886	0.00736039	0.0182431	0.0133057	0.0114009	0.016292	0.0378494	0.0163702	0.0156007	0.0296285	0.0054923	0.00907946	0.0394474	0.0302549	0.0155999	0.0505091	0.0448917
ESRRA	20.108	20.4007	16.2429	25.184	13.8703	23.3256	24.9624	27.9861	30.5323	34.1889	36.4401	9.67347	5.51865	25.3935	15.4617	17.0607	13.3744	25.1144	9.81852	41.3171	25.5683	21.2924	37.5654	19.394	8.46975	24.0368	28.4161	37.3786	13.9426	13.0854	31.2601	12.1994	19.8304	21.8949	32.2682	25.6613	9.81359	19.2938	27.2922	27.934	44.1558	18.5949	22.5774	20.781	31.6408	23.9371	26.3191	21.252	19.3424
ESRRB	0	0.00857625	0	0.00592667	0.013542	0.0516775	0.0455732	0	0	0.00468864	0	0.0114627	0	0	0.0106887	0.0339235	0	0.018381	0.00559267	0.0197554	0.00912358	0.0145789	0.0151867	0.00713999	0	0	0.00394861	0.0200631	0.0258123	0	0.019913	0	0.0112793	0.0271047	0.00559836	0.0279991	0.0139947	0.00692254	0.0450937	0	0.00718121	0	0	0	0.01709	0.0626703	0.00718085	0.00387501	0.252833
ESRRG	0.00179939	0.0491549	0	0.349787	0.632467	0.00240154	0.0121021	0.00594572	0.399562	0.0021789	0	0.0466104	0.00664814	0.00195215	0.00496722	0.717301	0	0	0.00519803	0.0183613	0.00423989	0	0.0197611	0.00663616	0.00554681	0.317536	0.143129	0.00372948	0.00299886	0.0815207	0.0277618	0.223611	0.0471754	0.00419868	0.0130083	0.0081323	0.00650357	0.00321703	0.00381016	3.55088	4.67547	0	0.00156652	0.0135957	0.166783	0.003236	0.0133483	0.356555	0.0158168
FAM3B	0.0109114	0.00805597	0.362317	19.4613	12.5074	0.174753	5.57733	0.0540815	0.0101803	0.0264252	0.0441242	9.04855	0.645019	5.93658	0	9.30274	6.40182	0.22273	0.00788009	15.212	3.01453	33.7569	7.15552	2.8219	6.98774	0.0687683	3.72762	0.746301	10.5381	0.0176548	37.3866	20.1879	1.27141	10.5279	0.0315524	0.0739703	1.19297	6.10268	0.0462089	20.3961	17.6869	11.8545	64.9557	0.0235551	0.469558	10.2137	2.23604	9.63125	0.274033
FAM3C	3.91323	4.07535	2.89604	3.10905	2.46832	5.0313	3.22234	13.4139	7.18964	3.46706	3.90478	3.79219	2.81953	2.88839	4.28719	5.56119	3.23118	7.32713	3.07473	22.5223	6.35443	4.43607	6.94051	4.01535	1.9191	2.67603	4.56407	9.37721	5.29774	4.04782	4.11646	6.94083	4.4461	5.14124	3.60051	14.6931	4.33434	5.39591	3.4566	6.62182	2.35182	9.09922	5.24005	6.41014	22.7675	3.84379	5.7888	9.14174	13.135
FAM3D	0.0119726	0	0.0454348	0.0366514	0	0.015979	0.0201308	0.0395608	0.0111704	0.0289953	0.013833	0.150634	0.0221172	0	0.0220335	0	0.0332125	0	0.017293	0.0305425	0	0.0150264	0.0187833	0.0220774	0.0184533	0.0137193	0.0122094	0.037222	0.0798137	0.0193718	0.584938	0.0791401	0.0174383	0.0139683	0.0865528	0.0432876	0	0.04281	0.0380272	0	0	0.0374853	0	0.038769	0.0132109	0	0	0.0359454	0.0300684
FAS	3.25298	3.08959	0.424288	2.11471	1.40583	2.36618	4.66392	0.272678	0.685487	4.43546	0.756615	3.52262	1.72116	5.66047	2.62095	7.45151	0.590764	2.90143	5.50599	1.21331	7.87821	3.56819	2.08817	3.97608	5.15331	4.23395	9.00728	1.36279	0.887299	3.66972	0.616058	3.65298	3.19488	0.838551	2.60184	2.11743	7.61048	4.12785	1.7192	5.40857	6.09236	0.441733	0.54693	1.24128	1.59792	0.32075	2.40917	3.80961	4.47928
FASLG	0.207998	0.0460701	1.34187	0.206941	1.83682	0.374763	0.227324	0.154639	0.0388123	0.214086	0.0720958	0.00769692	0.153696	0.0564138	0.0765569	0.535304	0.173099	0.0987392	0.0450643	0.159183	0.0735153	0.45684	0.0897382	0.0671208	0.0160293	0.143007	0.0424225	0.980757	0.0866621	0.168272	0.24068	0.371221	0.0757383	0.242669	0.375918	0.216209	0.939711	0.216922	0.31931	0.101198	0.0385762	0.130246	0.00905395	0.12348	0.0573779	0.196381	0.482178	0.114487	0.63991
FCER1G	16.0705	13.9102	65.4695	4.77	59.7669	16.8814	13.0825	3.12957	2.62249	7.15256	6.23634	4.62786	16.8568	5.65692	4.61057	15.7705	22.8835	15.2771	12.7387	14.2718	9.09475	29.1935	23.8864	9.8029	9.41806	14.9142	3.86344	27.6302	16.26	8.70044	10.5797	65.8912	7.56503	8.79248	12.3099	5.94666	18.2203	9.21304	23.9151	8.00713	10.8794	15.6559	2.5889	10.2671	42.4328	6.88642	13.372	78.1522	15.8065
FCGR2B	0.562542	0.119565	0.134773	0.289191	0.322938	0.398147	0.0859877	0.0328576	0.0318091	5.8864	0.479262	0.0315406	1.14417	0.311313	0.0156858	0.12757	0.173391	0.558369	0.32419	0.161868	0.0334725	0.748818	0.0423447	0.0654878	0.13137	0.579504	0.0260759	0.391591	0.12311	0.965368	0.255698	0.965301	1.20834	0.308268	0.406676	0.539295	0.446688	0.851658	0.797117	0.0110584	0.0210771	0.346919	0.00742029	0.1932	1.66781	0.429192	0.605935	1.54676	1.50199
FCGR3A	10.6518	7.18048	18.8415	37.711	33.6092	17.934	9.47034	1.98037	1.417	9.73146	2.84856	3.01422	7.51111	3.687	4.74403	14.4399	4.67601	8.96211	5.43993	4.76052	11.097	5.27398	18.4262	4.74093	1.00773	6.34488	2.09055	8.35659	7.74107	5.53189	6.05943	23.5899	2.84698	2.74928	5.5144	2.24081	6.57238	2.8046	11.3279	2.54483	5.27986	0.970223	1.08504	3.59477	16.969	2.60272	8.8288	43.0695	3.72878
FCGR3B	0.0702847	0.0330221	0	56.0251	0.145254	0.0426385	0.118177	0	0.0834597	1.30757	0.0295297	0.033102	0.0472141	0.0831833	0.470353	0.0909672	0.0177248	0.370049	0.0461446	0.0380332	0.0301111	0.0962313	0.230559	0.0353468	0.0590889	0.00732175	0.0130318	0.0397293	0.0532437	0.0516918	0.04929	0.0591297	0.0279194	0.0670914	0.0831447	0.236793	0	0.0342703	0.419417	0.0497393	0.225155	0.0100026	0.0500634	0.0344838	0.126907	0.0114908	0.663582	0.236595	0.0240704
FCGRT	63.8314	34.2947	34.9085	33.6804	75.5501	36.1466	53.9166	89.849	77.9002	49.535	155.976	33.7508	63.5655	93.1197	51.1283	39.8581	156.925	93.5538	111.614	36.3059	119.24	71.7447	23.5778	41.2175	80.1874	76.2877	67.071	83.284	88.8391	67.9095	71.2272	39.3381	71.0686	143.926	58.078	61.0098	106.604	40.6086	61.0395	54.7956	74.4899	30.2076	93.4858	69.7011	21.1519	161.486	79.2244	45.5961	56.7392
FGF1	0.0186114	0.181381	0.0423771	0.0199411	0.214802	0.293106	0.0312934	0.122995	0.0208372	0.00901464	0.0387062	0.0413226	0.0962676	0.193837	0.0513766	0.0407645	0.0206515	0.0494763	0.118281	0.0759654	0.100864	0.154166	0.145994	0.0892302	0.0745827	0.0383882	0.106285	0.0424319	0.235734	0.162613	0.153143	0.108261	0.0433726	0.0303992	0.0592004	0.5787	0.168168	0.687665	0.260099	0.202833	0.0966488	0.145677	0.0162027	0.0642843	0.119111	0.0301233	0.255416	0.00372515	0.444044
FGF10	0	0	0	0.00499072	0	0.0174066	0	0	0	0	0.00753443	0.00482623	0	0	0	0	0.00904491	0.0247652	0	0	0	0	0.0102307	0	0	0	0	0.0135158	0.16302	0.147717	0	0.0258631	0	0	0	0.00589436	0.0117846	0.00388622	0	0	0	0	0	0	0.539668	0	0	0	0.0327547
FGF11	0	0	0	0.0135014	0	0.0423811	0	0	0.00987568	0.0170897	0	0.00783385	0	0	0.00324662	0	0	0.00334986	0.0203849	0.00300028	0	0	0.0304449	0.00650618	0.00543816	0	0.0035981	0.00731285	0.0411618	0	0	0	0	0.00411644	0.0102028	0.00637841	0.0255048	0.113545	0.0149421	0	0	0	0	0	0.0272527	0	0.00654341	0.0141241	0.0575974
FGF12	0.194882	5.21133	0	4.43968	0.476172	0.0498816	0.10324	0.167602	1.03864	0.0711182	8.87706	0.663859	0.0542481	0.0144812	0.432341	0.108174	0.040731	0.0836417	0.289196	0.0499421	0.204437	0.0737119	0.0712005	0.12553	1.04101	0.0489457	1.51911	0.0940629	2.69619	0.0388753	0.0961049	0.127055	0.458825	0.12147	2.61313	1.40439	0.0530684	0.0811382	0.118709	0.31692	0.183194	0.0334335	0.102261	0.273746	0.13845	0.0432088	0.0396074	0.0454184	0.157558
FGF13	0.00475954	0.0323289	0.0307054	0.130404	0.923853	0.199461	0.0784268	0.831953	0.0230913	0.0852975	0.0329949	0.534014	0.0246188	1.88471	0.127883	0.274173	0.0132032	0.0334393	0.199363	0.0145701	0.114391	0.114692	0.627235	1.05407	0.149652	0.067629	0.115518	0.0286078	0.388679	0.194066	0.124834	0.587694	0.00831884	0.00666349	0.123869	0.563577	0.0516073	0.130476	0.114891	0.0426083	3.00479	0.016392	0.00497228	0.328792	0.884407	0.0231106	0.139463	0.154328	0.190058
FGF14	0.0171248	0.139077	0.31952	0.986223	0.296966	0.125705	0.0119974	0.016504	0.00932014	0.191812	0.0412206	0.038022	0.0316351	3.37201	0.0157576	0.67984	0.0415669	0.0135489	0.0329797	2.44642	0.0168129	0.0967174	0.343667	0.0184205	0.332129	0.0474229	1.02744	0.00147889	0.0118917	0.0438714	0.0623824	0.0584851	0.0041571	0	0.109356	0.207676	0.753047	0.0705877	0.116338	0.0361043	3.50687	0.52723	0.308109	0.485211	1.42823	0.0230977	0.060871	0.00142817	0.129024
FGF16	0	0.00878589	0	0.00910732	0	0	0	0	0	0	0.0137492	0.00880715	0	0	0	0.0130323	0	0	0	0	0	0	0	0	0.0183414	0	0	0.0369964	0	0	0	0	0	0	0	0.0107563	0	0	0	0	0.0220702	0	0.0103599	0	0	0.0107004	0	0	0
FGF17	0.00597353	0.0617445	0	0.013715	0.313377	0.00797251	0.010044	0.0888223	0.0222931	0.253168	0.0138036	0.437678	0.121386	0.0324032	0.0109933	0	0	0.00567142	0.0258842	0.0304775	0.0281507	0	0.103088	0.0275379	0.027621	0.184817	0.0121834	0.0123809	0.228976	0.0289959	0.046081	0.0868687	0.0957063	0.229986	0.0863684	0.507547	0.183517	0.0961174	0.00632437	0	0.0110788	0.168325	0.145612	0	0.0395483	0.123541	0.132939	0.041847	0.0150022
FGF18	0.0098867	0.116791	0	0.015133	0.363067	0.158342	0.0664945	0.0816714	0.0461213	0.0239437	0.0571152	0.0146342	0.200904	0	0.045487	0	0.0411393	0.103254	0.0285604	0	0	0.124085	0.0930655	0.0273466	0.137145	0.0793042	0.110905	0	0.181249	0.271947	0.305072	0.0914933	0	0.0692084	1.25793	0.0357461	0.0714673	0.247462	0.251217	0.0192408	0.421735	0	0.00860718	0.128059	0.0763651	0.0533402	0.0550062	0.118732	1.00561
FGF19	0	0.189577	9.72903	0.0982563	0	1.44575	0	77.7788	0.539026	0.00971643	0.528448	0.0118772	0.148232	0	0.029534	0.0087876	0.244852	2.72735	0.0115899	1.15996	0	0.0100708	0.188831	0.0147964	0.111308	0	0.00818284	0.0249465	1.16345	0.077899	1.58875	0.0106081	0	0.028085	0	6.83226	0.0725041	3.69644	0.203889	0	0.0446456	14.6593	0.00698564	0.441716	0.00885406	0.0216456	1.05656	2.52152	3.45609
FGF2	0.0347778	0.0877292	0.00549912	0.0354883	3.0408	0.270759	0.243649	0.0813989	0.0594873	0.0245657	0.217653	0.909443	0.224861	4.47732	0.0480021	3.54843	0.0281387	0.0990569	0.259535	0.0369666	5.66456	0.0945718	0.709303	8.21936	0.169743	0.0431729	0.218706	0.279316	4.22629	0.25791	0.0745231	0.111112	1.15662	0.669488	0.0754255	0.0785886	0.272346	0.101902	0.141145	0.462495	0.344003	0.0408327	12.7895	0.409797	0.649177	0.0364839	0.58585	0.0290039	0.494942
FGF20	0	0.0085881	0	0.00890229	0.101705	0.0155247	0	0	0.0108527	0	0	0.00860888	0	0	0	0	0	0.0220876	0	0	0	0	0.00912461	0	0	0	0	0	0	0.018821	0	0	0	0.0678554	0.0168183	0	0	0	0.0123153	0	0	0	0	0	0.0128352	0.0313785	0.0215723	0	0
FGF21	20.1139	26.0764	0.113587	24.7282	33.3412	1.95743	0.150981	7.24458	37.5743	4.8567	425.919	17.4116	0.193526	69.0849	23.2866	0.885043	1.03789	118.118	8.06284	0.67448	17.5083	18.2758	18.5603	0.0551934	29.8251	4.08151	32.2023	15.6022	9.77717	0.992806	0.269379	64.4596	1.72203	0.104762	6.36163	42.5301	18.1204	59.2027	24.4959	66.7841	48.4065	29.0511	0.091202	26.6375	54.3133	27.3312	303.996	0.344477	24.5434
FGF22	0	0.00687048	0.0176571	0.149559	0	0.211135	0.0156467	0.0768717	0.0260465	0.0112683	0.0537587	0.0413226	0.0171906	0.0201913	0.0685021	0.0407645	0	0.0265052	0.013441	0.126609	0.120598	0.0233585	0.0145994	0.0171597	0	0.0106634	0.00948977	0	0	0	0	0.0738141	0.0135539	0.17371	0.0538186	0.193461	0	0.138642	0	0.0362201	0	0.0145677	0.0162027	0.0100444	0.154023	0.0836759	0.0690314	0.0558772	0.0350561
FGF23	0	0	0	0.00497915	0	0	0	0	0	0	0	0.00963008	0	0	0	0	0	0.0123539	0	0	0	0	0	0	0	0	0	0	0.0325284	0.0105268	0	0.00860104	0	0	0	0	0	0	0	0	0.0241325	0	0	0.00702244	0.0789678	0	0.0844594	0	0.00816969
FGF3	0	0	0	0.0505395	0.423423	0	0	0	0	0	0	0	0	0	0	0	0	0.0208991	0	0	0	0	0	0.162363	0	0	0.0224478	0.0456234	0.110057	0	0	0	0.0320614	0	0	0.775975	0	0.0524727	0	0	0	0	0	0	0	0.0197933	0	0	0
FGF4	0	0	0	0	0	0	0	0.010034	0	0	0.0140341	0	0	0	0	0	0	0	0	0	0	0	0.0047641	0	0.00936077	0	0	0	0.0101217	0	0	0	0	0	0	0.400742	0	0	0.00643001	0	0	0	0	0	0.00670148	0.00546106	0	0	0
FGF5	0	0	0	0	0	0	0	0	0	0	0	0	0	0.00355149	0	0.00358507	0	0	0	0	0	0	0	0	0	0	0	0	0	0	0	0.0129833	0	0	0	0	0	0	0	0	0	0	0	0	0.0288975	0	0	0	0
FGF6	0	0	0	0	0	0	0	0	0	0	0	0	0	0	0	0	0	0	0	0	0	0	0	0	0	0	0	0	0	0	0	0	0	0	0	0	0	0	0	0	0	0	0	0	0	0	0	0	0
FGF7	0.00294953	0.280919	0	0.160271	0.0154735	0.9369	0.396749	0.00487305	0.0330228	0.017858	0.0340787	0.0240123	0.125321	0.00319992	0	0.00969052	0	0.406052	0.0383422	0.0100325	0.00347496	0.473837	0.0694112	0.00815838	0.00909219	0.125055	0.00300787	0.0305663	0.0540723	0.0381791	0.0075844	0.167672	0.0214802	0	0.0255875	0.0186624	0.271843	0.550179	1.07735	0	0.00547032	0	0	0.105061	0.130184	0.00530438	0.224272	0.0029518	1.03336
FGF8	0	0	0	0	0.367096	0	0	0	0	0	0	0	0.0258534	0.0151831	0	0	0.0194114	0.0132872	0	0.0119006	0	0	0	0	0.0431409	0.0160369	0	0	0	0	0.0359867	0	0	0.0326557	0	0	0.0252912	0	0	0	0	0.0219087	0.0121838	0	0.0154425	0.0125842	0	0.0840349	0
FGF9	0	0	0.238035	0.0529705	0	0.00577344	0	0	0	0.309053	0	0	0	0	0	0.00473744	0.00600005	0	0	0.0147139	0	0.00542922	0.03054	0.00797684	0	0	0	0	0.0144189	0.00699929	0.0444938	0.00571887	0.00630068	0	0.0375272	0	0	0.0257797	0.00457991	0	0	0.00677197	0	0	0	0.0544566	0.0401124	0	0
FGFR1	0.167001	0.293405	0.0704171	0.178696	0.313667	1.24238	0.597994	0.743424	0.139942	0.0505556	0.160793	0.726704	0.231379	0.0721357	0.23904	0.343768	0.0986592	0.453644	0.931352	0.215643	0.327919	0.976181	0.515514	0.461924	0.345581	0.313628	0.438377	0.379783	3.32184	0.605472	2.7356	1.32468	0.252249	0.196643	0.232516	0.15794	0.849502	0.967591	1.18364	0.120373	0.349877	0.169448	0.242313	0.297093	3.57287	0.215516	0.467435	0.24141	2.66406
FGFR2	2.00651	4.46559	1.07499	0.608229	0.00458666	6.33962	0.0396915	20.8827	25.2718	0.962351	8.07016	0.00776478	9.33214	0.0170734	0.113434	1.30984	1.69896	7.12708	0.00378846	13.2306	0.0339916	32.1784	6.74444	0.00967323	0.012128	4.54142	0.0481461	23.4521	0.891746	4.84653	34.5319	1.869	7.76668	13.9786	0.11377	5.01902	1.64003	11.2137	14.5429	0.0153135	1.03615	16.5885	0.00685033	2.40362	4.89118	14.0047	1.79006	0.173245	38.7166
FGFR3	4.24464	6.54961	42.613	19.3854	16.4149	10.9018	2.47233	16.287	14.0181	7.73191	4.15334	5.67563	12.5235	14.4671	2.04445	8.65646	17.8876	13.1427	2.10034	16.2096	5.7186	60.2979	54.5932	7.70351	4.67661	1.13569	7.21986	77.3721	8.99662	9.75308	67.0441	5.12286	44.1938	31.5328	3.96417	13.2871	6.91466	10.7162	16.3459	8.86929	5.1829	18.79	22.8366	7.78214	14.6426	47.7184	7.0508	6.26415	20.8256
FGFR4	26.4253	24.4454	38.2518	41.3688	63.2605	45.3837	25.5078	35.174	26.0622	35.7503	13.8447	9.91255	32.9748	42.2288	8.29104	45.7718	105.858	32.8213	29.1592	27.8956	26.3855	129.059	35.6943	29.3951	21.2577	26.7117	42.3357	78.5562	72.122	16.9737	160.606	15.664	77.1913	82.8321	42.7456	38.9617	27.3272	49.2772	28.5068	36.7642	72.2662	22.6859	44.9241	49.0673	26.987	146.119	66.1848	60.9688	67.7597
FGFRL1	5.83602	13.8182	10.5433	10.354	19.1021	7.16941	7.38346	17.2334	17.0112	14.5869	10.2402	8.41056	6.41437	19.0046	3.09478	37.4297	11.5047	6.22448	3.90683	5.45408	25.9456	17.3127	22.3585	13.963	10.3531	5.13504	19.1346	29.1009	6.60788	9.00591	15.835	11.285	14.9721	9.75455	11.7119	27.0094	11.7622	10.2447	15.6175	10.0117	13.3276	7.49724	19.2095	13.2531	18.9635	17.3489	16.7531	3.91581	14.0501
FIGNL2	0.471561	0.118522	0.0571127	0.61429	0.228086	0.281205	0.01687	0.0165763	0.187219	0.17009	0.0579616	0.00742554	0.0926731	0.174159	0.110787	0.439515	0	0.0476289	0.0434754	0.145039	0	0.100739	0.857872	0.740049	0.0463925	0.0344912	0.0716218	2.63058	0.568524	0.243509	0.41279	0.0397925	1.38829	0.550166	0.0725327	0.389965	0.181316	0.48432	0.201827	0.253837	0.241904	0.204187	0.0786126	0.0974673	0.929961	1.24501	0.0744284	0.281147	2.02843
FLT1	1.58488	1.47739	0.626385	1.10997	2.12033	2.2113	1.74937	5.62205	0.839335	1.22575	0.981561	4.07585	1.19655	1.65153	2.49345	2.80142	0.887553	1.33836	2.69368	1.33839	3.82844	1.72601	4.48693	3.3293	1.39863	1.17787	2.82562	2.16775	1.99471	2.2935	1.70175	1.91737	1.32625	1.42924	2.05625	1.45236	3.18362	1.39018	6.60419	0.846455	3.46169	0.526586	3.47598	0.808908	2.73629	1.28724	1.59584	1.19467	6.23574
FLT3	0.0141633	0.0487988	0.0447903	0.0722629	0.0495346	0.0756114	0.230204	0.0233998	0	0.0285839	0.0545471	0.0663871	0.00872139	0.0102437	0.00868836	0.144768	0.0458378	0.0806818	0.0136381	0.148539	0.00556211	0.663631	0.0111101	0.0609397	0.0145532	0.108198	0.0192579	0.127206	0.102286	0.336107	0	0.212207	0.233796	0.132193	0.354952	0.0298715	0.622817	0.157557	0.524829	0.00918785	0.0175119	0.0517349	0.00411009	0.00509587	0.0208376	0.101884	0.0262665	0.0141742	0.580981
FLT3LG	0.234571	0.412591	1.00799	0.696969	0.675615	0.451186	0.614817	0.410343	0.746679	0.526316	1.49859	0.0561664	0.599015	0.688605	0.317418	0.460892	1.11004	0.458516	0.468356	0.932802	1.01602	0.857231	0.61696	0.165386	0.31901	0.830102	0.379924	0.793616	0.540411	0.290237	0.798321	0.720547	0.24117	0.571492	0.987541	0.280624	0.423907	0.550945	0.68661	0.12084	0.268705	0.194407	0.390408	0.640429	0.441539	1.11666	0.511793	0.531645	0.684411
FLT4	1.35307	0.930201	0.164144	0.806355	0.71759	2.31801	1.44709	3.13698	0.515311	0.539878	1.64021	1.11631	0.840015	0.39947	1.30424	1.21703	0.286125	1.30359	2.4189	0.854445	1.56797	1.61746	1.8148	1.6995	1.23419	1.03958	1.66937	1.08268	1.32344	1.35664	1.08371	1.51314	1.092	0.7479	1.17701	1.10473	2.62959	1.05752	3.84671	0.543916	1.86358	0.329881	1.28803	0.603346	1.06469	0.466721	2.28308	0.550524	4.69057
FOS	4.12347	9.95698	0.978013	1.61037	1.071	60.4721	4.49642	9.25709	1.34086	0.969254	28.7676	47.9621	1.0866	1.2039	6.22707	10.5922	0.799027	27.8708	65.8299	3.96531	11.2021	11.766	21.5528	24.7343	3.32729	30.6088	3.74125	2.62048	17.8878	8.95794	2.66636	19.1037	1.0952	1.37957	1.0258	0.800246	12.2077	6.06753	34.6363	1.20372	6.20802	8.36323	14.9769	2.23195	6.49709	1.62488	7.16361	30.7011	33.5119
FPR1	0.431455	0.458262	0.603228	0.0637231	1.20453	1.05065	0.432727	0.0750344	0.0847466	0.0549948	0.0612194	0.184869	0.48941	0.279207	0.633823	1.06936	0.178482	0.538993	0.612253	0.212408	0.160521	1.14001	1.00347	0.188432	0.035	0.546447	0.0385956	0.352992	0.378453	0.845072	0.272495	3.27226	0.02205	0.132467	0.109442	0.246309	0.930176	0.108263	2.43624	0.044193	0.673849	0.106647	0.144975	0.122554	0.860288	0.163352	0.547475	2.06046	2.76597
FPR2	0.0159203	0.0274262	0.0503467	0	0.0278398	0.0212478	0.00892284	0	0.00495119	0	0.0122628	0.0353476	0	0.0115145	0.053714	0.10461	0.0073606	0.0755755	0.022995	0.0315881	0.0500169	0	0.0249768	0	0	0.0547291	0.00541173	0.0274973	0.00884422	0	0	0.140313	0	0	0.00767278	0.0239837	0.0383605	0.00316254	0.089895	0	0.0295264	0	0.00461996	0	0.0117113	0	0.0787331	0.207123	0.0799658
FSHB	0	0	0.0191649	0	0	0	0	0	0	0	0	0	0	0	0	0	0	0	0	0	0	0	0	0	0	0	0	0	0	0	0	0	0	0.0117839	0	0	0	0	0	0	0	0	0	0	0	0	0	0	0
FSHR	0	0	0	0	0	0	0	0.0102334	0	0	0	0	0	0	0	0	0	0	0	0	0.00729742	0	0	0	0	0	0	0	0	0	0	0	0	0	0	0	0	0	0	0	0	0	0	0	0	0	0	0	0
FYN	1.98443	2.33755	1.95558	1.28757	2.4092	2.18174	2.80652	1.47951	0.795958	1.28329	1.32242	1.11964	2.02138	0.902548	1.21409	2.04268	1.03263	1.73566	4.44675	1.79334	1.55134	2.77656	1.23452	1.61712	5.40257	3.2394	5.39019	3.43206	1.77505	5.05847	3.12706	2.79159	1.44711	2.16685	2.75427	2.11941	3.94527	1.58998	3.79243	1.29419	2.48145	1.92449	1.37009	1.68154	1.51436	0.964853	1.98506	0.532948	4.81412
GAL	0	0.0446053	0.0286589	0.0693557	0.158473	3.89053	0	0	0	0	0	0.0447132	0	0.016386	0	0	0.251393	0	0.0436315	0	0	0.0189563	0	0.0278514	0	0	0.0154026	0.046957	0	0.0244383	0.621408	0.0199677	0	0	0	0.0136523	0	1.6742	0.0959456	0	0.0280122	0	0	0.0163029	0.0166661	0.0679062	0	0	0
GALP	0.523321	0.0463648	0	1.56999	0	0.447005	0.351967	0.795434	0.0781211	1.39412	0.701384	0.294354	1.93349	0.0227099	0.423757	0	0.900065	0.298112	0.332585	0.0178002	0.0246619	0.0788163	0.0328408	0.193	0.0322637	0.239869	0	0.043386	0.802391	0.372567	0	3.01644	0.0304891	0	0.242126	0.151368	0.113487	1.28491	0.0664868	0.122214	0.116469	0.163848	0.346251	1.37827	0.138588	0.0752905	0.038821	0.083796	0.210287
GALR2	0.129556	0.0212562	0.409713	0.110169	0.100691	0.0192123	0.0484084	0.0237829	0	0.122018	0.0332642	0.053269	0.132963	0.0937032	0.0132459	0.0157649	0.0598993	0.0410014	0.0415842	0.403949	0.0339191	0.0722675	0.0451682	0.0796339	0.0221872	0.082477	0.0146799	0.149179	0.191927	0.13975	0.111047	0.114185	0.0209669	0.0503841	0.0208133	0	0.0520286	0.0257362	0.0609625	0.0280148	0.293677	0.0450703	0.187982	0.0466138	0.0158841	0.051776	0.0266965	0.100844	0.0361527
GALR3	0.118794	0.0501183	0.193206	0	0.445148	0.0905986	0.31388	0	0.0633341	0.267147	0.254901	0.0627994	0	5.19198	0	0.446049	0.117693	0.128899	0.0735362	0.129878	0.499845	0.0638978	0.0931862	0.219056	1.88329	0.0194466	3.59972	0.140695	0	0.274588	0.130915	0.112178	0.0494361	0.257393	0.098148	0.0766981	0.858719	0.0303407	0.107804	0.231189	0.723912	0.106268	3.38331	0.0549535	0.0187259	0.656172	0.0629457	0.0849186	0
GAST	0.167106	0	0.0792692	0.0959175	0	0	0	0	0.0389774	0.101175	0	0.0309187	0	0	0	0	0.0579451	0	0	4.58267	0	0	0	0	0	0	0	0.0432937	0	0	2.79303	0	0	0.0974808	0	0	0	0	0	0	0	0	0	0	0.368781	0	0.0774768	0	0
GCG	0.0164516	0.0121464	0	0.157384	0	0	0	0	0.00767465	0	0.0380162	0	0	0	0	0	0	0	0	0.132901	0	0	0.296819	0	0	0	0	0	0	0	0	0.0326241	0	0	0	0.00743525	0	0	0	0	0	0	0	1.0477	0.0272298	0	0	0	0
GCGR	0.0545248	27.7813	0.0344861	0.0185462	1.86457	4.2288	13.273	0.0100092	0.565239	60.8231	30.1829	0.0134512	33.7541	0.138025	60.1003	2.16957	2.03353	12.6485	44.0676	1.14367	0.749444	1.9085	0.123561	14.8302	8.09576	41.091	3.95402	2.93825	1.19142	10.4004	0.405037	0.032037	0.0441203	47.6466	29.9748	16.6418	14.5394	5.53118	9.711	0	0.101124	3.55654	32.674	0.653925	0.969316	16.2992	25.8078	1.10953	0.129329
GDF1	0	0	0	0	0	0	0	0	0	0	0	0	0	0	0	0	0	0	0	0	0	0	0	0	0	0	0	0	0	0	0	0	0	0	0	0	0	0	0	0	0	0	0	0	0	0	0	0	0
GDF10	0	0.0235911	0	1.00262	3.49224	0.255873	0.0134314	0.0131977	0	0	0	0.0354722	0.0295136	0	0	0	0.432113	0	0	0.0611347	0	0.0100257	0.0751945	0.0368256	0	0.00915367	0	0.405636	0.785473	0.0129251	0.102704	0.0316818	0.011635	9.30113	0.0115498	0.00722048	0.0144359	0.671236	0.0338295	0.0621843	0.0296305	0	0	0.00862234	0.00881444	0.366329	0.029629	0	0.561734
GDF11	0.0929923	0.11722	0.314165	0.168375	4.23198	0.411686	0.255512	0.224835	0.150246	0.151055	0.144131	0.246757	0.209497	0.118111	0.171137	0.0943888	0.125837	0.167965	0.271909	0.165866	1.52847	0.535166	0.642283	0.388962	0.615265	0.194927	0.235923	1.31626	1.93915	0.304597	0.991475	0.284857	0.15857	0.94204	0.15085	0.184511	0.3484	0.304126	0.348191	0.132421	3.69333	0.205938	2.58274	0.102823	0.503043	0.921836	0.222935	8.00125	0.808864
GDF15	17.3488	21.7138	61.9633	0.432019	18.9036	16.2859	7.51408	15.6526	0.939231	36.8547	18.8272	54.6944	3.87576	15.4329	3.5148	8.81974	3.94094	15.6317	44.7081	11.5924	8.95607	16.0234	228.88	40.5874	2.26214	66.5936	4.19273	74.8401	133.152	12.0412	47.2718	5.1493	73.6415	20.4602	12.5963	6.3185	22.5959	22.5169	87.5256	23.2166	13.8021	258.496	202.964	13.5977	146.336	22.7653	10.4339	48.2074	25.5422
GDF2	0	0.0074152	0	0	0	0.160853	0.0168872	0.0165933	0	0	0.243688	0	0.0185536	0	0.0646916	0	0	0.114426	0.0725331	0	0	0.0756314	0.0393922	0	0	0.253194	0.0102422	0	0.0167384	1.33254	0.0258258	0	0	0	0	0	0	0	0	0	0.0186271	0	0	0.0216816	0	0	2.73804	0	0.882828
GDF3	0	0.035101	0	0	0.0554249	0.0211506	0	0	0	0	0	0	0.0878263	0.0171928	0.0145823	0.0173553	0	0.015046	0.0686694	0	0	0	0.0621563	0	0	0	0.0323219	0	0	0	0.0815002	0.0628522	0.0230822	0	0	0	0	0.00944423	0	0	0	0	0	0	0.0349732	0.0142499	0	0	0.0398
GDF5	0.00742063	0.0164362	0	0.0227167	0	0.00990387	0	0.0245199	0.00692343	0	0	0.010984	0.109667	0	0	0.0081267	0	0	0.0107182	0	0	0.0279402	0.00582099	0.00684181	0	0.0340132	0.00756743	0.0076901	0	0.0120067	0.0190814	0.0196205	0.0108083	0.00865759	0.0107291	0.0201224	0.0134102	0.0265338	0.00785647	0	0	0	0	0.0240292	0.0163763	0.0133451	0.0275239	0	0.0838644
GDF6	0.0106106	0.0195849	0	0.00812055	0.102052	0.113291	0.0446021	0.131477	0	0	0.024519	0.0078529	0.0392027	0	0.0146453	0.0348607	0.117738	0.0453331	0.0153258	0	0.0625043	0.0865609	0.0665867	0.009783	0.00817708	0.0729524	0.0324616	0.00549798	0.0265255	0.0429205	0.0954946	0.0420826	0	0.00618967	0	0	0.0287626	0.050587	0.0505523	0.0412994	0	0	0	0.011453	0.122935	0.0238525	0.236136	0.0212377	0.353087
GDF7	0.13897	2.13235	0.21783	0.0215795	0.612823	0.623624	1.53745	0.92172	0.0338239	0.390212	0.127986	1.00615	0.66599	1.16899	0.290962	0.258066	0.399476	0.0573658	0.509086	0.409322	1.68472	0.194638	0.203806	2.71115	0.363198	0.537741	0.439533	0.868271	1.11104	0.534439	0.429851	0.0292889	0.821383	2.86908	0.107745	0.617145	1.45224	0.588131	0.671688	0.866233	0.418359	0.0378352	1.17828	0.256525	0.0866724	3.21275	0.0747032	0.0624838	0.730908
GDF9	0.113774	0.119369	0.113622	0.481196	0.0732998	0.119879	0.221506	0.0692526	0.201128	0.137769	0.0899421	0.265906	0.0553099	0.194893	0.258972	0.275431	0.0996678	0.0625379	0.077842	0.0661956	0.112877	0.105217	0.117432	0.187715	0.313801	0.0892029	0.482418	0.0868778	0.249494	0.155022	0.13858	0.134579	0.209323	0.160684	0.502159	0.357232	0.1515	0.435368	0.120456	0.12819	0.13327	0.168735	0.359706	0.135733	0.112327	0.113073	0.0888419	0.221731	0.225582
GDNF	0	0.00339263	0	8.28195	0.00803551	0.0858598	0	1.50318	0.0857449	13.243	0.254841	0.0136034	0.0254661	10.1898	1.14164	0.815242	0.0254942	0.344656	0.617253	0.00390746	0.37896	0.0980424	0.00360457	0.0635506	1.16861	0.0315933	0.370197	0	0.957278	0.00743501	0.354477	0.0364493	0	0	0.0465072	0.0415351	0.0249124	0.30123	0.102165	0.29511	8.65868	0	0.164018	0.00991983	0.623661	0.0082638	0.0085219	0.0229934	0.080783
GH1	0	0	0.0311509	0.0125644	0.0287088	0.0219111	0	0	0	0	0	0	0	0.0178109	0.0151066	0	0	0	0.0711382	0.139603	0	0	0	0.0151367	0	0	0	0	0	0.0531267	0	0.0868159	0	0	0	0.0148394	0	0.0195676	0.0347629	0	0	0.0514013	0	0.035441	0	0	0	0.0821495	0.0618465
GH2	0	0	0	0	0	0.0685413	0	0	0	0	0	0	0	0	0	0	0	0	0	0	0	0	0.0134284	0	0	0	0	0	0.0570595	0	0	0.113156	0	0	0	0	0	0	0	0	0	0	0	0	0	0	0	0.342636	0
GHR	3.22596	2.50458	0.394547	33.2687	0.976568	7.02914	2.80199	16.75	12.1695	3.59699	20.6372	3.16797	8.24769	6.82562	33.0845	7.70994	2.17544	3.79608	6.56023	3.56917	8.82617	2.99372	3.23659	2.2376	3.35141	6.36528	4.44393	1.57305	5.14864	8.06981	0.336087	15.0525	2.76469	3.04978	11.3042	13.6372	9.73783	4.77793	4.21111	3.45702	1.77948	0.809138	1.7068	1.38513	3.27774	0.742551	3.7571	0.481592	6.13605
GHRH	0	0	0	0	0	0	0	0	0	0	0	0	0	0	0.0316973	0	0.191117	0	0	0	0	0.0432337	0	0	0	0	0	0.0356983	0	0	0.0885779	0	0	0	0	0	0.0622517	0.0205288	0	0	0	0	0	0	0	0.0929243	0.0638843	0	0
GHRHR	0.0192249	1.55187	0.0364783	0	0.0448247	0.282241	0	0.0529371	0	0.0775983	0	0.00474275	0.0947056	0	0	0.245631	0.00888845	0.0243368	0	3.20962	0	2.51741	2.4129	0.90399	0	0.00734325	0	0.006641	0.12816	0.0622124	0.790956	0.135551	0	0.179436	0.0185309	0.926785	0	6.19823	0.162832	0.361669	0.392208	0.411311	0	2.7668	0.0353556	0.121008	0.0594224	3.02705	0.0321882
GHRL	0.0475654	0.0842832	0.144405	0.167453	0.133084	0.114269	0.143959	0.015717	0.106508	0.138233	0.0769395	0.211218	0.316328	0.061924	0.227594	0.125019	0.131949	0.0993516	0.137405	0.105162	0.0560388	0.764131	0.171635	0.157879	0.278587	0.163515	0.0776101	0.256322	0.28538	0.107746	0.366929	0.276684	0.13856	0.199779	0.178809	0.0687904	0.137533	0.294803	0.342441	0.388787	0.0529301	0.223386	0.0165638	0.154024	0.230935	0.111203	0.158782	0.161847	0.37032
GHSR	0	0	0	0	0	0	0	0	0	0	0	0	0	0	0	0	0	0	0	0	0	0	0.0123614	0.0145292	0	0	0	0	0	0	0	0	0	0	0	0	0	0	0	0	0	0	0	0	0.052165	0.0283397	0.0292248	0	0
GIP	0	0	0.0520343	0	0.335684	0.0366001	0	0	0	0	0	0.0202958	0	0	0	6.09659	0.0380366	0	0	0	0	0	0	0.480399	0	0	0.0279657	0	0.182813	0	0	0.145016	0.0399424	0	0	0	0	0	0	1.49433	0.610322	0	0	0	0.0605192	0.0246587	0	0	0
GIPR	0.0041459	0.0214267	0.118	0.0317295	0.0797493	0.271131	0.0487968	0.0205489	0.0116043	0.0602435	0.0143705	0.0368204	0.0306354	0.00449786	0.0267044	0.0635654	0.24727	0.086597	0.00598827	2.91555	0.0586136	0.156102	1.43096	0.0535152	0.0830709	0.0190031	0.0380513	0.0988185	0.359296	0.0402489	0.511717	0.115101	0.0845403	0.0580439	0.0239775	0.0224847	0.0449537	0.340962	0.043894	0.129095	0.00768917	0.246631	0.0180467	0.0134251	0.224161	0.0782871	0.0384439	3.4562	0.473756
GKN1	0	0	0	0	0	0	0	0	0	0	0	0	0	0	0	0.0187148	0	0	0	0	0	0	0.013405	0	0	0	0	0	0	0	0	0	0	0	0	0	0	0.020368	0	0	0	0	0	0	0	0.0153661	0	0	0
GLP1R	0	0	0	0.00483964	0	0	0.0106327	1.47312	0	0.00765736	0	0.00468013	0	0	0	0	1.17533	0	0	0	0.00745019	0	0.10417	0	0	0	0	2.49026	0.21078	0	0.195128	0	0.193422	0.206578	0	0.00571592	0	0.0301485	0	0	0	0	0	0	0.0139555	1.58645	0	0.00632855	0.0952894
GLP2R	0	0.00239536	0	0	0.0113469	0.0995918	0	0	0.006054	0	0.0112456	0.00720346	0.0359606	0	0.00597073	0.00710617	0.0315003	0.0030803	0.00468613	0.00275885	0.00382234	0.0325753	0.048355	0	0	0.00371773	0.0132342	0	0.0270354	0.0262473	0.208565	0.111518	0	0.00378519	0	0	0.0117262	0.0676717	0.0171747	0	0.0120343	0.0152369	0.005649	0.00700387	0.0107399	0.0233386	0.0421181	0.425342	0.228147
GMFB	4.23461	3.0937	2.17946	5.94971	9.92658	6.43792	3.15391	8.34005	4.38092	2.11018	1.31002	5.61497	2.81854	5.16903	4.90583	6.20857	6.653	4.63124	3.85212	2.80652	4.80022	4.86616	8.61766	4.8088	1.86154	1.79636	3.55173	4.19936	9.32495	2.61225	2.89018	2.15719	6.34372	4.90598	3.00073	3.91453	5.82186	2.97897	6.16653	3.63127	1.10171	3.13322	2.34113	2.24548	6.74237	4.67433	3.94951	6.77864	7.58007
GMFG	4.34869	4.97169	28.8301	3.85258	16.3844	7.7034	6.62506	3.24399	1.53686	5.18606	6.94288	2.29193	25.9748	1.42965	2.94657	3.34816	13.4709	6.66857	12.2578	5.24429	5.52704	29.1749	5.67509	4.34969	11.3538	14.1492	3.76279	9.94185	5.9737	6.88701	8.43749	19.0591	4.79845	5.48869	6.99253	2.48948	9.21618	7.5156	18.0676	4.02639	6.9899	3.63079	4.65779	6.287	8.68089	4.57387	7.13618	14.1112	11.0208
GNRH1	0.0334307	0.230368	0.211445	0.272909	0.253328	0.148727	0.0749478	0.349806	0.343099	0.242889	0.154503	0.313398	0.576404	0.157165	0.28711	0.134243	0.21639	0.19044	0.0965736	0.568555	0.10503	0.559438	0.428328	0.226036	0.515267	0.153233	0.125004	0.254061	0.408581	0.108183	0.343855	0.309374	0.308386	0.429037	0.16112	0.493558	0.261796	0.20587	0.165173	0.34699	0.103337	1.09903	0.116417	0.0962258	0.344293	0.190384	0.495992	0.624522	0.307852
GNRH2	0	0.0176145	0.0452692	0.0365178	0.0834404	0	0.0401148	0.0394166	0.0445186	0.722239	0.0275652	0.0706284	1.41034	0.129416	2.21727	0	0	0	0	7.20204	0.112432	0.0299432	0	0.0219969	0.036772	5.60443	0.0243298	0.0247242	0.0397614	0.0386024	0.184044	0.693894	0	0.0556695	0.0344949	0.0215649	0	0.0710899	0	0.0464304	0.486725	0.0373487	0.0415404	0	0.0789765	0.128717	0	0.0716287	0.0299588
GNRHR	0	0.00669904	0.034433	0.0555529	0	0	0	0	0.00846552	0.0109871	0.0104834	0.00671524	0	0	0.0250473	0.00993681	0	0.0258438	0	0.0154312	0	0.0227756	0.0284701	0.00836573	0.0559397	0	0	0.0188059	0	0.0293621	0	0.0119954	0	0.0105859	0	0.0164029	0.0163972	0.0054073	0.00960638	0.0176582	0	0.0142042	0.0078992	0.0293813	0.0200239	0.00815879	0.0168272	0.0544829	0.0911502
GPHA2	0	0	0	0.0162279	0.0741592	0.0565997	0	0.0350323	0	0	0	0	0.0391709	0	0.0195113	0	0.0882318	0	0	0	0.0249815	0	0.0166332	0	0.0326818	0.0728933	0	0	0.247371	0.0343086	0.0545242	0.0560647	0	0.0247386	0	0.0383325	0	0	0.0448989	0.495191	0.314608	0.464721	0	0	0.0233973	0	0	0.127323	0.0266265
GPHB5	0	0	0	0	0	0	0	0	0.0337374	0	0	0	0	0	0	0	0	0	0	0	0	0	0	0	0	0	0	0.0374733	0	0	0	0	0	0	0	0	0	0	0	0	0	0	0	0	0	0	0	0	0
GPI	39.7656	48.5573	48.1734	68.204	36.1821	38.3824	30.5725	23.1017	47.5637	42.4066	49.2139	16.3307	26.9693	54.5451	29.3596	23.3487	67.1052	51.1222	19.7297	67.1179	40.0306	37.9331	51.4961	28.7108	14.5538	15.2797	47.6391	57.049	62.8507	25.724	26.497	37.0681	23.6053	26.7419	20.9991	32.1964	42.7188	35.6603	36.3315	32.8318	33.4026	30.5828	24.3558	71.0869	111.261	40.8645	49.1622	57.6393	26.0442
GPR17	0.0955653	0.0434196	0	0.258796	0	0.16679	0.0494414	0.182178	0.109738	0.0178031	0.016987	0.163217	0	0.398762	0.182636	0.144912	0	0.488558	0.0318537	0.131272	0.00866074	0.0461311	0.11533	0.128778	0.0566518	0.0252711	0.35234	0.0380906	0.147017	0.166521	0.0567084	0.0680291	0.0321214	0.111495	0.0212574	0.166117	0.345403	0.232188	0.116744	0.143063	0.163606	0.126588	0.031999	0.0158695	0.186565	0.0264405	0.177231	0.0147137	0.627711
GPR32	0	0	0	0	0	0	0	0	0	0	0	0	0	0	0	0	0	0	0	0	0	0	0	0	0	0	0	0	0	0	0	0	0	0	0	0	0	0	0	0	0	0	0	0	0	0.041739	0	0	0
GPR33	0	0.0274299	0	0.0142167	0	0	0	0	0	0	0	0	0	0	0	0	0	0	0	0	0	0	0	0.0171272	0.0286314	0	0	0	0	0	0	0	0	0	0	0	0	0	0	0	0	0	0	0	0	0.0167035	0	0	0.0233265
GRAP2	0.13957	0.0632329	0.36113	0.614192	0.382741	0.296348	0.144005	0.943324	0.0207166	0.076821	0.0476446	0.0281715	0.175794	0.072268	1.43897	0.198011	0.0703954	0.117453	0.0229083	0.0998018	0.227965	1.89104	0.0920657	0.0380202	0.0586689	0.276249	0.0355828	0.44049	0.100444	0.246357	1.11745	0.457095	0.120124	0.111024	0.100899	0.223641	0.538845	0.531195	0.238443	0.148157	1.27662	0.104281	0.0138076	0.70874	0.948539	0.0998298	0.188247	0.057141	1.08742
GRB2	17.191	22.8025	15.176	26.0711	38.8497	18.1206	17.2353	20.4985	28.3803	39.8285	12.031	29.9972	9.85258	20.6785	23.2739	30.9098	18.2774	18.6024	13.4766	15.6203	25.9337	24.6171	33.1431	29.0246	7.89312	19.8185	30.6635	45.4206	39.1906	15.0765	39.6335	36.9719	18.8961	27.1583	18.5349	30.0879	30.1038	17.5372	17.9759	18.3202	20.038	15.9295	48.3311	15.5537	57.7297	32.0167	17.9754	39.342	29.2883
GREM1	0.00134431	0.307681	0	0.610095	0.0141048	0.672814	0.449807	0	0.0301017	0.0130227	0.0621283	0.749174	0.0993352	0.0758384	0.0643233	0.00294444	0.130521	0.192725	0.549501	0.360086	0.00316758	0.0792984	0.70442	0.722601	0.00414396	0.0785627	0.00411271	0.02229	0.0716935	0.036977	0.155554	0.36966	0.48363	0.188207	0.0330425	2.00494	0.252655	0.153818	0.14802	0.285166	0.0822761	0.0126268	0.003511	0.161064	0.24327	0.00604396	0.206926	0.00403604	0.12323
GREM2	0.0376691	1.97809	0.0446721	2.00361	0.452869	1.26315	0.316686	0	5.34206	1.31709	1.87147	31.4925	2.59212	31.8557	2.85093	0.01547	0.0587789	0.996921	1.77508	4.68865	0.0110949	0.0177289	0.0923402	0.295212	4.23107	3.78772	0.120044	0.0585554	0.533622	2.51416	0.0847544	0.00622493	0.150881	0.230728	0.667183	3.85177	0.323351	0.092601	0.00498518	6.5978	29.744	15.9439	0.127077	1.65179	0.0831305	1.17704	0.36676	0.0329859	0.0532147
GRN	53.1428	97.1939	55.2603	67.1095	154.852	82.6445	54.5865	76.8143	75.5103	52.1251	49.9289	126.992	56.1499	163.891	79.1015	104.755	92.1321	73.4504	98.5928	42.8893	84.1654	121.767	118.265	53.6469	36.9265	112.62	101.386	103.59	234.197	60.9222	110.216	225.517	67.1909	58.949	80.9418	80.7733	78.477	67.9014	99.8248	95.2701	92.3226	29.8298	72.0079	72.7089	321.147	74.3743	58.4901	264.49	74.4797
GRP	0	0	0	8.72312	0	0	0	0	0.0215269	0.0838171	0.0266582	0	0	0	0	0	0.160013	0	0	0	0	0	0	0	0	0	0	0	0	0	0.0593295	0	0.0336061	0	0.300239	0	0	0.0412505	0.024428	0	0	0	0	0.298854	0	0	0	0	0
GSK3B	2.94795	3.73916	1.87539	7.98653	4.59754	3.33544	2.78351	6.08602	4.9288	4.22007	2.77981	8.91946	3.7423	4.72281	4.97159	5.33955	2.7656	2.58231	3.02167	3.63295	5.10275	3.44131	5.87544	4.1358	3.09967	3.78274	4.30431	5.75417	6.06568	3.18253	3.8217	7.58052	4.133	4.3092	5.21972	9.48138	4.96397	4.14212	3.31843	5.718	4.52128	6.05468	3.57635	3.27727	8.23769	3.89676	2.88365	5.39974	6.02698
GUCA2A	0.241555	0.0509551	14.2086	0	0.844816	0.0921112	0	0	0.933677	0.0417858	0.0398702	0.0766175	0.254989	0	0.031753	0	0	0.262101	0	0.0293437	0	0.129929	0	0.0636325	0.0531869	1.10719	0	0.214566	0	0	24.5792	5.42882	0.100523	0.0402601	0	0.280723	0	0.0205649	0.219208	0.201471	0.0639998	0.54021	0	0.0744946	0.0380771	0.465438	0.0639966	0	0.0433324
GZMB	0.389638	0.22603	20.0937	0.266249	5.18321	0.575744	0.701938	0.275888	0.168783	1.7019	1.01292	0.278071	0.642669	0.392522	0.43536	1.47825	0.598342	1.29476	1.06528	1.56197	0.21313	1.8513	2.07402	0.166793	1.84454	0.781351	0.61021	2.69672	0.950863	0.585411	1.68179	5.8318	0.64859	0.552	0.905399	0.679226	1.1568	0.729783	2.88766	0.270817	0.800066	0.348552	0.496703	0.540733	0.168905	1.06359	1.72909	1.25338	1.36299
HAMP	0.110895	4.90769	2.92111	1.07336	0.650211	5.53714	63.1114	0.0323321	0.146068	0.545034	6.68526	0.115868	5.08535	0.0495392	0.162067	5.67229	13.21	0.606948	14.02	0.682285	0	1.44093	2.52783	3.9154	0.160868	4.82885	3.89825	0.811217	5.89242	31.9914	6.47472	2.56992	0.370549	1.32425	3.15018	0.129719	0.153251	0.380976	59.5192	0.0380853	0.278261	0.0919075	0.153334	3.93598	0.640619	0.258089	218.968	0.169736	3.56326
HBEGF	0.800233	1.70521	0.432067	1.37425	0.693996	2.11	1.94718	2.17126	2.26413	1.22898	0.563771	1.33858	0.97351	0.430554	1.61637	1.77413	1.03775	1.7666	3.82462	0.95156	4.20039	1.52693	3.03658	2.7953	1.84508	1.30466	1.24732	1.32147	3.26369	1.22111	1.38854	2.71793	0.672801	0.979168	1.86252	0.605711	2.0105	1.00807	4.11907	1.01292	2.20812	0.967563	2.28824	0.962074	3.8766	0.602561	1.1221	2.50673	2.72051
HCST	3.65153	2.81421	39.9915	2.52494	17.1959	3.59098	4.30858	1.5876	1.5839	5.35253	3.25674	0.900829	9.11244	1.98076	1.29685	5.19165	6.8863	6.72084	2.35952	4.14009	3.01897	18.2513	2.588	1.83102	4.14702	11.415	1.20859	10.091	4.27062	2.95412	2.80039	17.3618	2.19273	3.02699	5.46483	1.47658	4.34137	4.25679	9.42761	2.55579	3.74258	3.20918	0.641369	3.00792	7.98775	4.20509	4.21762	12.5658	7.40086
HDGF	74.786	75.3403	105.85	77.1617	110.406	68.9604	60.9071	137.503	124.699	111.091	73.4438	146.09	94.1432	165.119	101.964	106.552	124.056	75.3643	63.4608	69.9918	141.113	137.949	230.398	76.281	112.383	106.515	112.922	126.658	168.599	83.594	176.679	110.326	131.18	143.351	51.9953	65.6508	94.5405	73.2455	101.693	88.9953	132.196	76.7177	108.68	108.04	199.384	207.261	89.1343	192.33	87.0964
HFE	2.53611	2.85336	0.472682	3.71241	0.883351	2.97382	3.18801	5.83632	4.68073	1.68004	1.38316	3.20596	0.990696	4.12149	1.86246	5.16836	1.91479	3.87622	2.07893	3.23928	5.25024	1.42431	7.81109	3.59836	1.2372	1.09822	3.89883	2.64614	1.94323	2.50799	2.82029	2.02175	3.54776	2.48658	1.95599	8.10306	4.97082	2.35265	2.18688	2.65971	1.84165	2.2803	3.96698	3.88396	9.47572	4.36801	5.57601	3.90579	4.97033
HGF	0.189795	0.180863	0.791445	0.435763	0.1042	0.916034	0.293149	0.277108	0.236791	0.0400856	0.252437	0.0637001	0.252768	0.026337	0.125905	0.0628397	0.0275495	0.632783	0.261387	17.6274	0.0156004	1.10239	6.69449	0.221791	0.0544244	0.617054	0.0855221	0.279022	0.165512	0.617756	0.266719	0.259667	0.122148	0.167362	0.124445	0.157591	0.458649	0.309074	1.17762	0.0773093	0.159629	0.0345487	0.0614818	0.171513	2.16245	0.170662	0.53207	7.64847	3.23686
HLA-A	352.133	656.321	1251.38	555.719	1635.86	235.261	885.069	142.125	162.623	337.2	252.034	58.3095	340.584	296.52	65.6161	300.927	445.596	890.935	278.079	489.456	608.026	413.461	320.823	192.538	150.468	309.492	211.059	445.216	183.421	169.822	401.158	443.287	190.504	253.543	296.213	268.701	342.671	236.571	980.391	722.381	242.24	231.998	257.424	799.903	868.314	204.662	757.386	591.665	323.814
HLA-B	289.538	872.137	996.451	653.433	1942.12	359.301	1536.16	130.363	108.578	398.337	232.849	47.1318	337.072	172.006	53.2905	539.823	236.337	1668.05	303.764	595.356	893.64	430.823	238.997	102.598	116.612	371.761	181.786	349.24	126.809	192.992	252.078	639.4	158.832	71.0513	569.143	150.787	294.094	297.935	1125.22	501.352	475.607	50.0359	74.3685	1106.23	928.619	113.917	1490.18	458.647	353.298
HLA-C	255.351	676.03	428.306	350.363	963.749	420.89	697.289	306.915	137.28	267.394	167.273	172.587	207.286	228.789	116.025	433.325	402.694	1162.79	517.334	293.619	872.668	305.109	242.049	184.757	129.379	450.934	160.468	128.028	104.13	163.888	170.672	577.287	203.453	153.323	345.871	302.431	200.5	170.91	594.127	626.386	323.054	34.3402	88.7561	637.916	864.431	117.438	903.9	435.716	245.61
HLA-DMA	13.5911	13.9017	24.7446	6.42238	273.954	20.6108	28.2721	3.76374	2.33511	16.42	6.15946	5.12111	24.0765	3.11037	4.80562	80.9215	23.8058	44.6039	9.84893	27.3774	11.3473	26.2673	16.077	5.59392	5.0638	14.4464	3.36621	16.2768	7.21882	10.6317	15.1827	84.225	6.00417	6.81635	27.0449	4.01325	17.2796	17.1735	41.0268	172.332	40.9859	7.73907	1.82137	13.7751	24.5729	4.50797	74.3945	49.3735	18.3024
HLA-DMB	3.27742	2.63775	3.96976	0.842549	21.8996	4.72884	5.42558	0.892009	0.503734	1.27691	0.682291	1.15505	4.32462	0.572015	0.892698	8.89694	2.80825	3.36396	2.69896	4.60545	1.61507	6.49036	4.30141	1.66062	0.962187	3.02091	0.632318	5.39845	2.25656	2.6344	2.39703	14.4483	1.52363	1.75193	3.96413	1.05992	6.17436	2.73745	9.32009	6.8544	5.09275	1.38667	0.385576	2.21271	5.23612	1.09233	7.36104	3.71474	6.43019
HLA-DOA	2.78962	1.90062	3.92809	0.374553	36.8262	2.60619	2.50983	1.19669	0.182646	0.61633	0.452366	0.615754	2.73036	0.207072	0.454838	3.52671	1.04538	1.64953	1.39964	1.09452	0.957141	4.68664	2.25353	0.979174	0.384704	1.64318	0.464152	2.52068	1.13374	1.65501	1.37172	6.12716	1.1833	1.7929	2.05207	0.597201	4.85554	1.62746	6.59088	0.371455	1.15275	0.268153	0.234338	1.29423	1.86849	0.809729	1.00747	1.68486	5.59249
HLA-DOB	0.105678	0.210663	2.84738	2.56382	7.89093	0.53596	1.84796	0.0523787	0.276073	2.06025	0.2442	0.422345	0.644233	0.321018	0.0777931	8.06661	2.85827	0.220734	0.15264	0.781809	0.199206	2.33434	1.2103	0.302049	0.0488644	0.811346	0.0646612	1.34704	0.22896	0.512968	0.380437	2.68241	0.338629	0.19727	3.31565	0.534922	1.43233	1.11472	1.58877	2.55023	0.293993	1.60473	0.0184003	0.547524	0.909547	0.560647	1.01912	3.08818	2.65405
HLA-DPA1	18.2549	8.53712	12.9309	2.18295	118.992	18.0266	35.088	5.14139	0.398386	6.12189	2.39176	6.55296	7.86909	2.87582	2.82893	26.8454	2.00419	18.4895	8.32854	7.26481	11.2565	32.236	10.4612	9.5399	3.68552	6.18468	2.19463	13.622	4.42919	8.79915	4.02299	50.2405	10.5081	14.2517	11.3053	4.24555	33.5266	4.70255	48.3648	6.0762	20.324	0.57754	1.46315	7.28212	27.6967	9.75851	11.5552	14.4505	45.16
HLA-DPB1	36.6529	29.0142	57.9071	11.2097	350.874	39.839	68.4303	16.063	4.12203	69.5649	16.7687	11.9649	75.2867	4.55651	9.58073	84.2025	39.5877	26.2297	30.1387	40.5001	17.8531	112.753	38.9611	17.9802	18.1407	59.7117	12.677	63.8582	21.1865	44.8602	37.1208	151.311	28.2401	33.7177	62.9223	5.91386	78.5188	31.3687	116.223	29.9838	54.9566	12.1366	5.87353	29.1442	82.8831	19.6989	51.1832	36.7305	58.4468
HLA-DQA1	8.22306	3.12243	13.4246	1.81141	19.5645	11.4174	3.89387	2.12613	0.219505	2.65323	1.74559	1.30276	3.43505	0.719595	1.72667	5.44178	2.44546	4.43779	2.87412	6.10303	2.56809	18.5349	2.76606	3.17797	1.48979	4.68704	1.56672	21.0618	4.90358	5.49906	3.94323	17.1554	5.85022	3.56831	8.05737	1.04023	15.5621	3.70283	26.5322	1.848	2.73895	1.55753	0.732911	2.85765	5.52047	4.03987	2.53379	1.99991	20.7052
HLA-DQA2	10.9899	7.2769	0.122233	0.70994	2.59095	1.42721	6.86719	2.2776	0.901545	0.748854	3.66194	1.30634	22.5393	1.38378	1.32779	9.01613	15.011	0.0244645	4.35456	2.6732	4.4171	30.9819	14.8364	6.03448	1.90635	11.5894	0.262774	2.64364	3.67174	13.5918	7.58666	32.8562	3.67806	4.1036	2.06772	1.51393	1.81608	0.0767809	8.32074	2.48229	4.2533	0	0.0336493	6.4944	11.6291	2.81517	5.3522	12.4038	0.177964
HLA-DQB1	10.1538	7.46711	35.1521	1.77114	119.734	14.0113	18.0758	4.82232	0.7135	4.68347	3.29838	3.33959	6.40534	0.660253	2.53106	5.96338	5.0481	23.2797	6.71421	9.49566	7.39647	33.7739	5.90779	3.20797	3.01153	7.91895	3.70335	26.0906	5.92548	5.72685	6.2391	28.9486	7.22551	6.51177	21.6625	2.59126	25.9035	11.155	43.6027	4.11421	5.33912	5.2776	1.58599	4.14453	7.61664	6.07722	6.05169	3.11341	35.8781
HLA-DRA	197.439	165.41	202.786	45.8913	1280.96	221.233	431.097	67.0846	12.7377	127.741	41.5618	67.6523	158.124	28.2749	50.8288	537.581	131.703	153.039	94.3206	173.696	98.188	359.137	181.471	100.163	37.3091	149.834	40.9541	325.966	105.661	186.623	109.302	828.464	137.855	139.47	283.316	31.669	390.485	158.408	716.527	451.89	376.506	26.7036	20.4058	80.7514	245.214	88.9126	601.686	145.887	357.283
HLA-DRB1	80.3469	100.899	286.081	42.5114	1705.02	130.224	275.003	41.122	5.38062	144.753	52.5574	33.6995	74.0466	13.1666	34.8463	384.799	70.5082	201.245	118.357	114.712	100.39	518.075	110.71	45.1059	37.8988	159.241	31.9085	176.5	47.1782	89.6571	85.9558	624.046	100.118	78.5442	347.029	17.4077	252.112	116.583	535.456	167.794	259.575	21.2384	25.2213	72.5527	157.427	61.2937	495.974	141.138	278.327
HLA-DRB5	32.4912	28.0845	17.1794	4.20997	262.15	23.2731	93.4363	8.88235	1.96279	38.6456	6.21169	27.3336	15.3437	4.98734	21.5089	136.614	18.7181	135.391	14.4053	21.1755	64.9922	47.4089	26.5385	15.7759	3.55475	105.856	6.4361	28.4711	11.0377	39.561	20.356	157.355	18.0899	22.7989	130.929	3.97216	130.022	15.0725	233.108	47.2498	55.2886	41.667	13.9736	17.796	34.545	13.7321	106.555	24.4067	49.0383
HLA-E	90.4266	163.206	337.713	132.107	1072.15	147.95	515.47	162.461	107.927	162.429	107.59	127.118	146.223	104.504	63.1905	234.975	166.737	347.693	205.911	104.394	498.503	172.08	114.076	100.722	102.346	139.105	132.478	184.671	76.2157	116.155	149.975	310.431	108.387	81.8989	170.555	127.857	202.381	101.844	328.028	505.365	215.619	88.515	70.0015	227.09	160.269	132.373	375.34	207.928	228.104
HLA-F	12.0876	34.9597	64.3109	57.5196	81.8933	12.3906	68.5762	5.47638	17.0368	35.9763	30.3144	3.47732	19.0467	15.0124	4.59384	42.749	8.28568	52.2894	15.1208	36.1503	38.5725	21.0393	13.1853	4.93237	4.60014	20.8208	9.83647	11.3503	8.11684	11.3558	13.2677	22.2215	9.92593	12.6886	19.5495	8.19544	14.9142	8.79357	27.9363	40.0868	19.3402	6.89516	4.6455	37.3355	25.3334	8.19347	68.811	32.0729	26.3483
HLA-G	3.09616	7.67183	8.53752	4.38964	15.269	1.96208	7.20963	1.08562	1.34044	3.14228	1.53128	0.263765	2.13971	3.22609	0.153722	1.56121	2.81147	1.98791	5.87156	4.00604	1.25964	2.61389	2.89176	0.872826	0.841126	1.17412	2.06708	2.70076	1.20649	1.96421	4.49622	4.52019	1.7195	1.26039	3.36549	3.29187	2.39509	2.86064	6.59138	8.4314	1.6318	1.22045	0.504187	3.16163	1.53615	1.76256	3.92438	1.93938	4.4753
HNF4A	39.1169	36.9725	14.391	52.9267	36.064	28.5212	34.6853	44.9659	59.0099	40.2512	33.2023	74.9726	35.7761	69.5697	57.3334	91.2513	45.327	39.3774	23.6706	33.3292	53.2995	26.5342	23.981	62.306	43.5427	63.9077	70.7735	45.1631	35.4405	40.4477	26.139	28.0883	40.0563	44.2994	33.4839	61.3349	63.9586	21.7559	15.1184	58.3088	78.0668	41.9804	41.1436	27.0118	27.7351	71.7816	30.0886	9.53077	22.0256
HNF4G	3.14176	2.4131	1.00777	1.0756	2.61483	4.08407	1.89596	6.02088	2.04692	0.578819	1.35947	3.25045	0.9736	2.07434	3.15785	1.43623	1.42801	3.17681	0.979574	2.23038	0.832705	1.42547	8.39021	2.50118	0.623403	1.7041	0.233315	2.3371	5.07263	1.19649	1.75442	1.25307	3.11219	3.38424	1.30546	4.09539	5.47831	2.37632	1.28466	0.866653	0.257624	2.39201	1.45472	1.21712	2.84911	3.44589	2.78068	3.54488	8.71121
HRAS	9.95517	10.1258	20.0952	16.3158	17.0753	9.27233	7.58585	8.69613	19.6731	44.141	13.3009	6.4429	18.3122	13.6382	9.6769	6.1239	28.3653	8.62719	10.922	13.8598	10.1066	30.4252	42.8092	5.89778	12.7158	26.8443	9.5905	11.063	21.0568	6.64869	24.2643	14.7991	11.0292	7.7472	33.3199	9.69722	3.48328	7.37807	9.86711	9.33665	9.07451	15.5016	15.6371	12.4144	13.5324	23.6551	6.24578	31.1604	11.1977
HSP90AA1	134.321	200.101	92.5521	78.749	129.655	148.505	181.039	203.831	67.0466	63.7896	39.0135	287.518	144.025	193.909	120.423	111.618	100.655	110.356	264.706	79.7	159.364	222.479	139.32	195.347	51.1386	77.0213	88.6555	143.909	262.643	120.856	84.3253	132.021	165.38	166.607	78.5574	55.1545	79.9866	121.284	298.359	122.209	43.1745	66.7824	85.5508	105.137	156.615	166.948	88.565	107.376	188.191
HSP90AB1	319.227	229.972	350.774	258.062	529.968	270.938	295.014	233.611	111.232	220.376	89.3591	687.768	90.279	359.093	160.727	236.68	216.969	216.797	363.156	173.325	322.61	354.003	406.803	562.902	70.2963	138.298	333.793	492.941	392.782	139.979	394.902	468.741	376.563	349.5	173.632	260.156	308.552	261.267	451.167	924.454	248.435	153.329	503.414	339.683	464.828	467.672	291.777	459.576	272.574
HSPA1B	8.29483	4.34729	26.1579	7.92185	50.2846	6.1642	28.5619	1.42833	10.0426	43.2421	1.55681	318.633	52.1567	15.2687	32.0641	11.498	49.888	22.7756	12.2509	4.32481	25.7021	12.3754	23.3204	30.1963	75.2443	9.98699	14.0267	11.3403	124.028	22.0914	41.5171	43.0093	2.6432	2.93506	14.9773	21.803	16.6368	8.98608	49.2122	64.5713	19.833	19.4596	54.8821	43.9932	31.5062	26.627	8.26214	49.1059	6.67994
HSPA1L	0.239263	0.302015	0.248963	0.531618	2.25396	0.288427	0.337412	0.726837	0.475267	0.476644	0.321031	1.18242	0.171096	1.62443	0.255671	0.481795	0.321158	0.212507	0.457067	0.196893	0.718354	0.891186	0.605438	0.747194	0.808927	0.274171	1.62139	0.807842	0.630289	0.487037	1.1114	0.591809	0.494633	0.693363	0.6584	1.0046	0.753187	0.280576	0.522974	1.18662	0.558263	0.459136	0.645052	0.541506	0.740932	1.74197	0.50098	0.440275	0.629972
HSPA2	0.37387	1.04139	0.702953	1.68557	2.76968	2.80337	1.02295	0.656996	2.22928	0.740817	0.820739	0.99109	1.0046	0.188055	0.878821	1.38467	3.8044	0.545351	0.648014	1.26012	1.36146	1.57833	3.40734	1.47598	0.220021	1.29694	1.07448	2.46557	1.34248	0.8579	1.06625	2.17926	1.22771	5.4405	1.19415	1.16742	1.28372	1.84524	2.05111	0.410102	1.60111	0.755546	0.284059	1.24367	2.09646	7.87275	2.32591	1.35718	5.44594
HSPA4	19.5969	16.2062	26.0637	26.7928	18.5597	38.4139	29.0894	19.6678	14.2832	27.6865	11.5279	23.0406	26.2052	22.2397	12.4573	29.4565	44.179	19.0505	23.7786	15.6053	21.9394	38.0307	43.8083	44.2755	14.0047	14.8718	19.8176	26.0546	18.177	13.8515	23.7563	18.2854	20.85	24.2053	24.1661	24.9937	21.9329	23.7727	42.1127	24.6497	21.2803	25.4441	22.3155	62.0891	26.2587	19.6109	14.6476	37.208	25.3352
HSPA5	125.904	282.411	365.282	463.913	269.739	274.482	185.39	672.405	166.6	441.276	349.842	108.449	96.4259	233.743	234.756	218.339	217.971	182.613	148.334	576.412	158.656	296.81	271.89	156.904	81.2573	105.619	170.788	423.237	330.971	161.41	213.146	309.277	220.916	189.178	110.869	135.575	113.369	256.874	351.495	305.874	306.153	59.5017	122.723	264.916	388.744	396.181	376.533	219.314	245.23
HSPA6	0.488597	0.715359	1.08423	2.60486	2.15775	1.39262	0.473426	0.246275	0.293605	2.74764	0.172227	55.4427	1.04028	1.12304	0.236225	0.453464	0.781074	1.0064	0.610031	0.464772	0.819552	0.997786	1.55907	0.809348	0.702018	0.464988	0.194238	1.07275	31.371	0.509174	3.27936	2.0035	2.60537	0.531396	1.28117	1.27252	0.853041	0.873534	3.75257	4.67379	0.399331	1.99648	0.237915	1.07265	4.18514	2.62116	1.36687	4.29303	1.29988
HSPA8	196.18	108.969	147.236	150.999	115.746	231.792	248.511	112.921	75.4424	35.0782	20.8475	122.218	42.8699	141.777	84.2489	147.13	142.035	121.106	110.588	51.9835	109.758	167.797	247.308	225.518	14.3671	96.908	82.3772	212.032	122.884	128.403	164.733	123.409	61.2848	102.351	87.8552	157.978	115.312	123.949	251.915	87.7802	103.24	22.1676	321.787	227.204	252.408	139.159	81.0662	67.4241	213.276
HTN3	0	0	0	0	0.0330628	0	0	0	0	0	0	0.0279861	0	0.0102561	0	0.010353	0	0.00897543	0	0	0	0	0	0.00871615	0.0728536	0	0.0192811	0	0	0	0	0	0	0	0	0	0	0	0	0.0183978	0	0	0	0	0	0	0	0.00946083	0
HTR3A	0	0.0052297	0.0403209	0.00542102	0.0371599	0	0.01191	0	0	0	0	0.015727	0	0	0	0.00775731	0.00982475	0	0	0.0180699	0	0.0266702	0.427843	0	0	0.0162336	0	0.0220217	0.0236101	0.0343829	0	0.299659	0	0.00826406	0.0204829	0.0192077	0.038402	0.0759831	0.0449961	0.0137851	0	0.0110887	0	0	35.8128	0.0191078	0	17.7645	0.0711576
HTR3B	0	0	0	0.00649398	0	0	0	0.014019	0	0.0102749	0	0.00627994	0.0313503	0	0	0	0	0	0	0.00721546	0	0.0745474	0	0.00782344	0	0	0	0.202249	0	0	0.0218191	0.0560889	0	0.00989973	0	0	0	0.106193	0.00898367	0.511919	0	0	0	0	0.0842666	0.0305196	0	0	0
HTR3C	0	0.00854256	0	0	0	0	0	0	0	0	0	0.0171264	0.0213743	0	0	0	0	0	0	0	0	0.0145216	0	0	0.0713338	0	0	0	0	0	0	0.0458891	0	0	0	0	0	0	0.01225	0.0450351	0	0	0	0	0	0.010404	0	0	0.0290585
HTR3D	0	0.00701002	0	0	0	0	0	0	0	0	0.0109701	0	0.0175398	0	0	0	0	0	0.0137139	0.00807377	0	0	0	0	0	0	0	0	0	0	0	0	0	0	0	0	0	0	0	0	0	0.0148636	0	0	0	0	0	0.00950201	0
HTR3E	0	0.00574583	0	0	0	0	0	0	0.00726096	0	0	0	0	0	0	0	0	0	0	0	0.00916878	0	0.00610477	0	0	0	0	0	0	0	0	0	0	0	0	0	0.014064	0	0	0	0	0	0	0.00840021	0	0.00699787	0	0.0155768	0.00977254
IAPP	0	0	0.0171927	0.041607	0	0.108837	0.152351	0.0449098	0.0929918	0.427904	0.230316	0.00670595	0.0167385	0.0196602	0.00833754	0	0	0.0860266	0.0785245	0.138689	0.0747253	0	0.30563	0	0.0279311	0.0519145	0.0462008	0.0563397	0.0302018	0.0879643	0	0	0	0.0317139	0.104806	0.0737108	0	0.0107996	0.153489	0.105802	0.0336095	0.127661	0	0.0782417	0.0099981	0.114065	0.0504117	0.00906791	0.034134
ICAM1	22.1834	10.7219	4.09158	13.9931	7.05059	14.7645	17.888	11.782	6.10976	5.42757	2.2527	1.42338	0.831932	16.3816	4.5583	12.9739	3.44653	23.2798	1.33155	2.69416	6.14212	12.1022	22.85	4.23032	0.988092	2.48311	4.19811	30.6812	3.94696	2.5289	11.2668	17.2586	15.8968	5.97116	3.81486	11.7282	14.5821	17.3027	11.0841	6.11437	1.86698	3.05223	2.52303	3.70004	101.577	16.8934	36.0604	23.7488	99.7688
ICAM2	0.817368	4.83224	0.769716	1.03795	1.86342	1.83431	1.42523	1.22037	0.728709	1.44431	0.986355	0.618374	0.425022	0.446662	0.958248	1.20678	1.53681	1.59805	2.91213	1.72989	1.78329	2.42405	3.69029	1.04389	0.503923	1.32515	1.54359	2.50978	1.74566	1.31272	1.72813	4.24228	1.00532	0.847659	1.1993	0.864685	1.44429	1.30978	3.26919	0.777678	1.44855	0.142174	1.49169	1.05217	1.1825	2.07969	0.864596	5.011	2.82827
ICOS	0.103928	0.109616	0.605683	0.30111	0.441367	0.277413	0.0624093	0.0981168	0.00692605	0.215738	0.068616	0.0769168	0.219416	0.0322145	0.00683079	0.35771	0.185337	0.1762	0.0107223	0.22725	0.0174917	0.24224	0.104817	0.0068444	0.0228835	0.238182	0.0227109	0.930854	0.210322	0.108101	0.114532	0.942141	0.162186	0.0952695	0.053666	0	0.778088	0.23447	0.408691	0.0433409	0.0413035	0.10459	0	0.104166	0.294885	0.200253	0.09637	0.0297167	0.587273
IFI30	0.379879	0.175293	0.465519	0.19382	0.553579	0.507001	0.34598	0.104603	0.184597	0.335415	0.155447	0.292862	0.19006	0.25758	0.131082	0.260015	0.142702	0.428292	0.240052	0.457625	0.27972	0.317849	0.732558	0.240795	0.207367	0.136032	0.0887777	0.705332	1.2794	0.0896366	0.48841	0.826553	0.276651	0.277001	0.228854	0.278988	0.357552	0.490506	0.737349	0.169422	0.176135	0.297344	0.0895688	0.0939665	1.8426	0.263304	0.410961	1.65533	0.377643
IFITM1	9.2539	42.9398	19.1457	6.79001	71.1512	62.845	405.436	7.2389	5.6824	15.6526	9.45257	9.37839	21.3939	18.7575	22.3334	28.6909	18.2822	221.166	9.03333	82.9881	21.6121	22.5212	6.57452	13.4602	6.61311	109.79	10.5308	38.096	12.029	12.2373	14.6326	68.4521	5.6668	18.687	7.1499	5.35725	29.241	22.5035	58.1685	3.2905	43.834	2.67534	3.98857	16.327	11.2743	6.2939	14.4645	783.131	39.5868
IFNA10	0	0	0	0	0	0	0	0	0	0	0	0	0	0	0	0	0	0	0	0	0	0	0	0	0	0	0	0	0	0	0	0	0	0	0	0	0	0	0	0	0	0	0	0	0	0	0	0	0
IFNA13	0	0	0	0	0	0	0	0	0	0	0	0	0	0	0	0	0	0	0	0	0	0	0	0	0	0	0	0	0	0	0	0	0	0	0	0	0	0	0	0	0	0	0	0	0	0	0	0	0
IFNA14	0	0	0	0	0	0	0	0	0	0	0	0	0	0	0	0	0	0	0	0	0	0	0	0	0	0	0	0	0	0	0	0	0	0	0	0	0	0	0	0	0	0	0	0	0	0	0	0	0
IFNA16	0	0	0	0	0	0	0	0	0	0	0	0	0	0	0	0	0	0	0	0	0	0	0	0	0	0	0	0	0	0	0	0	0	0	0	0	0	0	0	0	0	0	0	0	0	0	0	0	0
IFNA17	0	0	0	0	0	0	0	0	0	0	0	0	0	0	0	0	0	0	0	0	0	0	0	0	0	0	0	0	0	0	0	0	0	0	0	0	0	0	0	0	0	0	0	0	0	0	0	0	0
IFNA2	0	0	0	0	0	0	0	0	0	0	0	0	0	0	0	0	0	0	0	0	0	0	0	0	0	0	0	0	0	0	0	0	0	0	0	0	0	0	0	0	0	0	0	0	0	0	0	0	0
IFNA21	0	0	0	0.0146749	0	0	0.0322407	0	0	0	0	0	0	0	0	0	0	0	0	0	0	0	0	0	0	0	0	0	0	0	0	0	0	0	0	0.017332	0	0.0114272	0	0	0	0	0	0	0	0	0	0	0
IFNA4	0	0	0	0.0153651	0	0	0	0	0	0	0	0	0	0	0	0	0	0	0	0	0	0	0	0	0	0	0	0	0	0	0	0	0	0	0	0	0	0	0	0	0	0	0	0	0	0	0	0	0
IFNA5	0	0	0	0.076125	0	0	0.0334493	0	0	0	0	0.0294464	0	0	0	0	0	0	0	0	0	0	0.0156052	0	0	0	0	0.020616	0	0	0	0	0.0289755	0	0	0	0	0	0	0	0	0	0	0	0	0	0	0	0.0499617
IFNA6	0	0	0	0	0	0	0	0	0	0	0	0	0	0	0.0117017	0	0	0	0	0	0	0	0	0	0	0	0	0	0	0	0	0	0	0	0	0	0	0	0	0	0	0	0	0	0	0	0	0	0
IFNA7	0	0	0	0	0	0	0	0	0	0	0	0	0	0	0	0	0	0	0	0	0	0	0	0	0	0	0	0	0	0	0	0	0	0	0	0	0	0	0	0	0	0	0	0	0	0	0	0	0
IFNA8	0	0	0	0	0	0	0	0	0	0	0	0	0	0	0	0	0	0	0	0	0	0	0	0	0	0	0	0	0	0	0	0	0	0	0	0	0	0	0	0	0	0	0	0	0	0	0	0	0
IFNAR1	12.1281	12.2765	5.09092	10.3646	12.2009	9.93993	16.1536	14.0602	16.8134	5.33179	7.92809	14.9677	31.028	11.2544	12.0574	13.5278	13.1006	14.6301	10.5367	8.50065	12.196	15.2334	13.2635	9.03879	10.8018	17.0078	9.77814	16.3985	9.00535	11.1782	11.4905	7.99625	13.5618	13.6626	11.4756	9.17676	22.4243	10.329	12.9493	10.2914	7.73282	20.2546	9.57647	11.3688	14.3316	12.9566	9.11363	12.7363	20.5083
IFNAR2	2.7363	3.742	2.58389	1.81406	2.67899	2.27184	2.0965	1.93346	2.14004	1.50984	1.62746	2.4881	2.68072	3.42104	0.84581	3.17842	3.35853	3.19588	1.56124	1.96856	2.1709	2.57435	3.98578	2.12266	1.56105	1.74575	1.82268	5.21269	4.51776	1.63875	2.9764	3.52745	4.58671	4.22015	1.68588	4.1158	5.56016	3.01792	2.00944	3.51149	1.29437	5.4361	2.05986	2.03026	6.67726	4.53061	2.23346	4.68043	4.95901
IFNB1	0	0	0	0.0174937	0	0	0	0	0	0	0	0	0	0	0	0	0	0	0	0	0	0	0	0	0	0	0	0	0	0	0	0	0	0	0	0	0	0	0	0	0	0	0	0	0	0	0	0	0.0287033
IFNE	0	0	0	0	0	0	0	0	0	0	0	0	0	0	0	0	0	0	0	0	0	0	0.0626536	0	0	0	0	0.0137953	0	0.0430777	0	0	0	0	0.019247	0	0	0.00793316	0	0	0	0	0	0	0	0	0	0.226476	0
IFNG	0.0161207	0.0119021	2.04942	0.04935	1.88875	0.0860612	0.108422	0	0.0752028	0.351371	0.0186257	0	0	0.087446	0.0445011	0.406055	0.0223598	0.0918323	0.0232844	0.0959573	0.0569774	0.101163	0.0379368	0	0	0.0369454	0.0328792	0.818598	0.0537333	0.0521671	0.0829054	0.724606	0.0234801	0.0188079	0.0233081	0.0728569	0.466121	0.0576424	0.034135	0.0313729	0.269083	0	0.0421031	0.104403	0.0533642	0.159451	0.26907	0.0645325	0.0404862
IFNGR1	13.6475	31.1192	3.0866	23.3852	32.0787	19.3663	205.689	9.95529	8.74999	8.46174	5.48844	37.6719	6.3487	27.6651	32.4033	67.228	14.9677	23.0505	13.5239	11.5012	45.5638	15.8154	15.2106	40.1994	30.9461	11.7968	55.9114	16.5253	68.3746	23.3918	20.5807	15.6091	14.7165	14.8889	21.3113	9.83005	30.2665	13.7905	26.9818	28.2542	49.3194	18.1367	13.4903	10.8648	82.4584	20.5811	52.0929	40.8595	64.8098
IFNGR2	11.3034	9.26614	11.8315	20.0784	50.5176	11.465	19.7529	5.32628	14.2656	7.66297	6.24636	12.406	12.9526	12.2558	3.9492	14.8271	15.6413	12.8604	4.17742	15.3597	17.4121	27.3157	17.9781	6.53192	8.70072	10.0337	7.78613	49.6877	10.3588	6.0105	38.8734	26.2298	14.2028	19.464	4.61326	7.16513	15.8477	12.9111	15.6544	16.7308	16.5102	17.8093	19.7734	11.8857	38.5887	22.1053	11.9576	21.031	18.0006
IFNK	0	0	0	0	0	0	0	0	0	0	0	0	0	0	0	0	0	0	0	0	0	0	0	0	0	0	0	0.0178491	0	0	0	0	0	0	0	0	0	0	0	0	0	0	0	0	0	0	0	0	0
IFNW1	0	0	0	0	0	0	0	0.0167908	0	0	0	0	0	0	0	0	0	0	0	0	0	0	0	0	0	0	0	0	0	0	0	0	0	0	0	0	0	0	0	0	0	0	0	0	0	0	0	0	0
IGF1	1.12658	1.22255	0.0737115	1.38248	0.598657	0.398577	0.0612362	0.0401136	0.480241	1.22012	3.17556	0.24618	0.479922	0.368772	1.49017	2.20164	0.198692	2.63482	1.25548	1.06534	2.60019	0.362625	0.152366	0.0850663	1.63161	0.990467	1.84957	0.196259	0.178044	0.377136	0.0499462	1.1106	0.229865	0.0708173	3.00498	0.882239	0.754688	0.574435	0.149093	0.916678	0.117078	0.304073	0.00211375	0.628972	0.139313	0.0502138	1.35534	0.31588	0.304886
IGF1R	0.0668598	0.141651	0.0413686	0.111237	0.0559172	0.368574	0.149077	0.240135	0.061024	0.0105601	0.0722115	0.332395	0.0886064	0.0157686	0.0668719	0.128934	0.0463681	0.0662384	0.0944718	0.0716856	0.0667837	0.158706	0.142519	0.234518	0.047045	0.0699525	0.10672	0.120501	0.254347	0.122291	10.2668	0.257485	0.0529254	0.0508727	0.0756544	0.111672	0.225892	0.240802	0.276992	0.0339438	0.0970444	0.0659857	0.0404918	0.0957004	0.238968	2.6884	0.167124	1.02549	0.850526
IGF2	0.796203	2.46563	5.49853	0.639496	0.634662	5.715	3.04647	2.04521	1.95032	1.40701	50.3653	0.799571	67.6226	0.054941	1.05365	1.49743	140.382	5.0832	2.30004	17.0052	85.9087	1720.13	1.28666	3.5823	7.53657	2.3986	3.64375	2039.51	6.47064	373.458	3290.61	1.52125	1116.23	1371.95	32.4897	1.37579	276.892	51.9513	122.025	1.6864	58.7538	283.6	0.962586	1.51839	1.53049	1070.21	7.8578	0.050681	1961.14
IGF2R	12.8337	8.67995	2.75345	18.7015	5.50348	9.78032	8.05491	7.42521	12.5401	3.22096	11.9859	22.2026	3.52725	9.18447	10.063	20.8788	6.27203	4.81583	3.09262	6.29522	7.58166	9.12449	16.6088	15.1811	3.91104	5.55892	5.90322	23.8674	8.07611	6.198	9.81616	5.31136	9.58983	5.79191	7.93933	9.67441	8.56687	6.8595	7.89509	6.90132	6.44257	9.50318	12.2584	6.53678	27.0057	16.3389	14.1031	8.65814	17.4284
IKBKB	1.00486	2.71982	2.93642	1.49845	3.35343	1.33089	2.56984	2.11007	3.07381	0.914912	0.722306	4.45221	1.7146	2.92721	2.26394	3.08299	0.649004	0.893955	2.35714	1.20018	2.34966	2.95074	3.03113	2.96862	0.91331	0.797676	0.940645	3.45592	3.4964	1.66311	3.70324	2.16253	2.29595	2.54384	2.09891	2.84445	2.51944	1.42853	1.62018	2.00783	1.59335	1.29989	1.21205	2.05955	2.36571	0.824239	1.74264	1.99208	4.4212
IKBKG	7.48901	1.24469	0.53842	1.74585	5.18587	1.85645	1.76813	1.6822	4.64084	1.61696	1.57498	5.08139	0.0822267	3.66399	1.93525	7.48257	0.385863	5.91641	1.04473	0.392693	2.66791	0.872883	4.16374	2.86249	0.188664	0.72045	2.96181	1.8797	2.42947	1.24234	0.529359	4.35452	2.17996	1.38266	2.63058	2.47938	2.64442	3.04389	1.01909	6.89748	8.07981	0.409375	2.90145	1.57346	9.3687	3.83731	3.86945	0.968866	2.43836
IL10	0.11912	0.0439739	0.244861	0.0151942	0.260382	0.158983	0.0333817	0	0.0185231	0.0120203	0.0229385	0.0367335	0	0.0538469	0.0730736	0.282652	0.0550743	0.160219	0.172055	0.0168823	0.0116951	0.112128	0.140163	0.0823716	0	0.02275	0.0202461	0.205743	0.0496313	0.0321231	0.0510509	0.183727	0.0289169	0.0347442	0.0861152	0.0628087	0.143513	0.0354947	0.210194	0.0193186	0.0368209	0.124319	0.00864199	0.0107147	0.076674	0.0892599	0.128867	0.268228	0.149582
IL10RA	1.72721	1.25972	2.50918	0.64028	2.81586	1.917	2.13777	0.698537	0.383286	0.348581	0.401893	1.73769	1.94434	0.699435	0.480106	3.31021	1.23111	1.93025	3.81142	0.846558	1.3354	5.42317	1.98292	1.21372	0.628561	1.75586	1.79807	3.28464	0.814592	1.14503	0.81733	3.81758	0.773058	0.783657	0.979838	0.615269	4.15636	1.40281	3.47317	0.577736	1.54606	1.93403	0.216675	0.653808	2.42203	0.749582	2.19107	2.91091	4.54489
IL10RB	6.88961	17.8233	7.61234	7.61096	19.1039	8.69059	7.22557	11.4209	12.4961	8.56687	11.3921	7.63419	29.93	10.9815	5.77164	8.00986	15.4737	16.6496	9.32719	11.5269	12.8435	20.2084	13.0481	4.14708	10.2503	11.546	8.64665	14.4635	9.0906	8.05168	20.7711	16.8395	22.1936	21.2698	5.62209	9.47021	17.0795	9.35193	10.8883	12.5823	8.09878	12.5126	9.21524	12.1833	20.457	17.1353	10.774	28.1665	15.6075
IL11	0.00735118	0.00542745	0	0.022504	0	0.058867	0.0247207	0	0.00685863	0.0445079	0.0594546	0.0163217	0.01358	0	0.101464	0.00805064	0.0203925	0.0139588	0.0106179	0.256293	0.0173215	0.0922622	0.184528	0.0135556	0.0679821	0.0168474	0	0.0152363	0.183772	0.0594717	0.189028	0.0971844	0	0.00857656	0.0212574	0.00664468	0	0.0657136	0.00778293	0	0.0136338	0.0690482	0.0063998	0.0555433	0.0486691	0.0462708	0.0136331	0.147137	0.101542
IL11RA	1.96764	5.70568	1.83186	8.53915	9.80791	3.12921	2.35763	3.9496	11.9327	4.4869	4.44056	8.46525	3.88965	5.03743	5.53741	2.72378	5.52209	2.94623	4.34935	5.99294	6.08246	5.26792	2.5893	3.1112	5.65445	3.30832	4.20534	4.12106	2.7889	4.61186	5.82797	6.5214	10.8275	11.5049	3.66249	5.55584	3.73029	2.43288	2.8571	2.09358	3.10358	3.2386	4.10637	5.70161	1.74504	11.984	1.7137	3.94751	4.00063
IL12A	0.01925	0.00710623	0.073052	0.42724	0.151481	0.0256918	0.113285	0.0159019	0.0449005	0.174824	0.0444827	0.0284937	0.213366	0.0208842	0.0531395	0.0210816	0.267002	0.00913822	0.0139022	0.130953	0.0340189	0.0604001	0.211405	0.0709939	0.014835	0.0551464	0.0294462	0.19949	0.224574	0.0311469	0.989988	0.0508979	0.210285	0.1909	0.0556653	0.0347999	0.0521816	0.0458879	0.0407612	0	0.0714037	0.768449	0.0670348	0	0.223031	0.233677	0.1428	0.616475	0.157122
IL12B	0	0.0105011	0.0134939	0.0326557	0.012436	0.0379654	0	0	0	0	0.00821665	0.0105265	0	0	0	0.0155764	0	0.00675189	0.0102718	0.0120946	0	0.169584	0	0.0131137	0	0.0244474	0	0.0221094	0.0237042	0.0115066	0	0.0376066	0	0	0.0102823	0	0.115665	0.0339048	0.0451754	0	0	0.0111329	0	0.0076761	0.0156942	0.00639465	0	0.00711704	0.0535809
IL12RB1	0.529935	0.205747	1.5343	0.265718	1.29418	1.11578	0.514651	0.158501	0.140656	0.697019	0.158349	0.118337	0.329134	0.0743434	0.147129	0.765472	0.386526	0.303615	0.151766	0.691482	0.344463	0.831379	0.999826	0.206391	0.147867	0.37168	0.130446	1.3256	0.22841	0.280887	0.469887	1.77563	0.385931	0.261166	0.310446	0.132139	1.08977	0.490054	0.904466	0.186705	0.169455	0.293219	0.0994292	0.197243	0.559542	0.3656	0.499867	0.393186	1.03833
IL12RB2	0.0236852	0.0454662	0.10786	0.0217521	0.0994038	0.0442556	0.0079649	0.0156525	0.0265178	0.0458887	0.0273657	0.0385645	0.0175017	0.0359742	0.0435885	2.49531	0.0722742	0.0134924	0.0342104	0.0684781	1.09944	0.0653982	0.0148635	0.200907	0.175228	0.0759943	1.0531	0.166908	0.055263	0.0306584	0.353243	0.169087	0.0620963	0.01658	0.0205471	0.0599448	0.0684844	0.0197611	0.0651983	3.25426	0.465632	0.0593254	0	0.00511308	0.0784049	0.0937089	0.0263552	0.156443	0.14871
IL13	0	0.0100428	0	20.5288	0	0.00907712	0	0.0112365	0.310928	0.00823558	0.0628643	0.0100671	0	0.0368927	1.20158	0	0.0377336	0.0452005	0.0098235	0	0	0	0.0106701	0	0.0104826	0	0.866965	0.00704815	0	0	0.0174885	0	0.00990606	0	0.019667	0.0122951	0	0.00405314	0.0144013	0	0	0.010647	0	0.00734109	0	0	0	0	0.0597828
IL13RA1	17.0616	26.7055	6.28896	41.0838	32.388	24.2456	44.9305	38.3758	25.3798	20.6709	38.3983	39.9458	24.234	28.5909	28.0888	78.7633	19.6906	58.3094	19.2724	13.3244	42.6571	16.5491	26.6229	51.9998	22.4622	13.2621	34.267	21.1299	33.7565	30.331	12.5877	33.3083	22.5022	26.2666	51.5709	32.9749	24.6729	31.408	18.9528	54.4428	56.2564	12.2755	14.9747	18.3676	59.5514	32.0563	30.2757	14.7376	34.5817
IL13RA2	0.0603782	0.0980713	0	0.804031	0.0422334	0.0483499	0.0203041	0.159606	0.0337996	0.190092	0.46042	0.0268114	0.066923	0.209612	0.100004	0.145471	0.133994	0.0458597	0.209302	0.020537	0.31299	0.136402	0.520989	0.133605	0.0744486	0.262912	0.0492581	0.350396	0.342129	1.07462	0.0310513	0.0159643	0.263826	0.19724	0.104758	0.0545754	0.0436451	0.0863572	0.217343	0.188006	0.537504	0	0.0105128	0.104274	2.66493	0.206308	0.358318	0.507569	0.257782
IL15	0.214836	0.0977514	0.488222	0.954009	0.318894	0.223381	0.252019	0.0536537	0.470804	0.060499	0.129883	0.0850461	0.23074	0.143638	0.248255	0.429518	0.148991	0.137562	0.158761	0.0849698	0.223676	0.244551	0.903369	0.253356	0.0693054	0.214692	0.165588	0.111319	0.199839	0.22635	0.154166	0.346766	0.0509393	0.0553755	0.762105	0.194189	0.261837	0.154828	0.222164	0.131263	0.0463307	0.406711	0.0173983	0.191445	0.496165	0.0876042	0.222376	0.407503	0.404662
IL15RA	4.83	6.19405	15.2413	0.984394	2.33189	5.29018	3.6722	4.90935	6.27954	8.96372	1.75909	1.04909	2.71557	0.746134	1.78742	2.08708	4.63856	7.78576	2.44173	3.6161	1.81846	4.21043	10.9464	1.52476	0.404591	4.56011	1.07612	6.09896	3.64859	4.47665	2.38947	5.04584	1.73581	1.49453	4.29635	2.58626	4.37377	5.60979	4.95249	0.582379	1.27553	10.898	1.15635	4.44842	10.607	0.901664	5.49132	51.7839	10.6997
IL16	0.383153	0.256515	0.785548	1.13318	1.17821	0.561209	0.690646	0.405029	0.162078	0.273266	0.328268	0.233105	0.365902	0.183181	0.413815	0.74143	0.301752	0.373024	0.307195	0.51219	0.330906	1.91131	0.361689	0.288901	0.190178	0.556261	0.187088	1.18784	0.311164	0.488604	0.263009	1.36722	0.432742	0.41861	0.539899	0.224527	1.39951	0.715978	1.47309	0.448664	0.328207	0.264325	0.110247	0.313683	0.431741	0.372266	0.617239	0.484186	2.3649
IL17A	0	0	0	0.00808342	0	0	0	0	0	0	0	0	0	0	0	0	0	0	0	0	0.0124437	0	0	0	0.0325588	0	0.0107711	0	0	0	0	0	0.015384	0.0123227	0	0	0	0	0.0223649	0	0	0	0	0	0	0	0.019588	0	0
IL17B	0.0648555	0.0239417	0.584537	0.0124088	0.0283532	0.108198	0	0	0.06051	0	0	0.0119998	0	0.0175903	0	0	0.0449781	0.0153939	0.117095	0.0275748	0	0	0.0254374	0.0448475	0	0.0185795	0	0.235237	0.0540439	0.0524687	0.0416923	0.107176	0.0236158	0.0567498	0.117214	0	0.117204	0.0579756	0.0343323	0	0.120284	0.0507646	0	0.017501	0.0894545	0.0291587	0	0.454339	0.101801
IL17C	0	0.0105125	0	0.0108971	0	0.0190034	0	0	0	0	0.0329023	0	0	0.0154473	0	0	0	0	0	0	0.0335502	0.0178704	0.0223384	0	0	0	0	0.0147556	0	0	0.146452	0	0	0	0	0	0	0	0	0.0277101	0	0.0445801	0	0	0	0.0128032	0	0.0427487	0.0357594
IL17D	1.45182	0.348584	0.235163	0.501354	0.0928829	0.102397	0.099232	0.0292515	3.98655	13.0779	0.034094	0.052414	6.12714	0.0640272	1.43367	0.0452428	0.0982298	0.0112065	0.0426216	7.17646	0.111249	0.177769	0.916641	0.0272069	0.109156	0.0473394	0.0361108	0.464818	0.127865	0.0477454	0.470445	0.780221	0.0773637	0.468212	0.298655	0.192043	0.0533266	0.0175855	0.499867	0.045942	0.0437823	0.0923894	0.0462413	3.01311	0.18234	0.0583744	0.306461	3.9572	0.281615
IL17F	0	0	0	0.0140835	0.901031	0	0	0	0	0	0	0.0136193	0	0	0	0	0.0765723	0	0	0	0	0	0	0.0339333	0	0	0	0.0572109	0	0	0.189276	0	0	0.0644086	0.0266067	0	0	0.0438666	0	0	0.0682585	0	0	0	0.101527	0	0	0	0.0231079
IL17RA	1.29075	2.31986	2.40378	2.99344	2.23433	2.1577	1.87068	3.22029	2.666	1.9024	1.38838	2.53776	1.38088	2.70163	1.5836	3.06509	1.75413	1.68553	1.04516	2.22658	1.92774	2.42723	4.29547	2.48832	0.820554	1.59112	2.26693	3.19317	2.04975	1.80015	3.67663	4.19131	2.43704	2.11942	0.738323	2.78514	2.8902	2.45009	1.24232	2.02564	2.42611	2.1839	2.80168	1.82009	4.80505	2.9895	2.3051	1.9985	3.85013
IL17RB	35.1982	25.2714	16.3473	4.90185	24.8872	17.295	59.4217	7.15428	4.209	13.6724	9.11031	16.072	8.54869	16.4988	20.1727	25.2759	31.8868	21.2253	6.26394	20.8405	16.6377	29.5913	11.0067	26.75	4.75169	24.3883	7.68509	42.6585	28.8459	5.24965	36.6621	5.16083	12.8309	16.0914	86.7939	16.0479	19.2017	62.7554	22.2252	8.0374	12.2985	20.6404	25.1175	32.1324	22.108	14.1745	6.952	8.4409	45.3923
IL17RC	11.8113	8.42662	11.0292	36.727	4.66633	4.74472	9.84617	4.43012	36.8042	8.07026	23.2558	7.43234	2.90817	10.6275	10.0724	9.85171	7.42642	14.7781	8.31448	6.74115	11.3422	4.44555	13.5839	11.3366	3.51962	10.0951	13.4342	7.0232	7.64031	4.73048	6.23889	7.52437	8.33396	10.8334	11.6559	15.981	11.4188	6.02597	7.96729	11.6741	8.3901	8.4834	9.77061	9.91997	5.83643	10.85	11.2771	13.6166	5.56664
IL17RD	0.00205365	0.0348734	0	0.053438	0.0179561	0.15349	0.0448895	0.0983952	0.0210766	0	0.00949112	0.0334379	0.0417315	0.00668398	0	0.0607246	0.0170908	0.0233975	0.0504265	0.0104779	0.0266145	0.159803	0.359243	0.0151477	0.0379835	0.0235328	0.0251314	0.100027	0.0821427	0.0332285	0.20595	0.0380098	0.077771	0.0431277	0.0148464	0.012994	0.0779368	0.160327	0.0434854	0	0.0418968	0.00321493	0.00357575	0.0399003	0.203946	0.0443191	0.0495119	0.382275	0.410033
IL17RE	2.37249	0.486737	2.73289	10.6886	0.462607	0.341861	0.409504	3.52426	16.5172	1.39321	6.41384	1.68439	14.1335	0.988559	3.97592	0.469062	3.84983	1.0206	2.03181	1.10334	1.60287	8.04752	1.23192	0.538148	1.99987	1.88139	1.17331	0.648386	0.97275	0.30574	10.7868	3.89147	1.76755	1.75876	1.08676	1.47646	1.50251	0.405395	1.03585	3.99611	0.700905	5.80445	1.57924	2.17557	0.278005	0.73628	0.661933	1.21027	2.38863
IL18	0.933932	1.02051	2.83535	0.257313	3.69749	1.1268	0.690943	0.123439	0.299747	0.407125	0.362564	0.248832	2.12554	0.672775	0.171874	1.00643	2.43533	1.25557	1.10075	1.40409	0.404913	2.86004	2.34434	0.516651	0.610334	2.26025	0.10667	2.42349	1.49423	2.41779	1.21036	5.45235	0.424411	0.679917	0.702171	0.303903	3.09198	1.13986	2.57084	0.363511	0.983839	0.865528	0.208144	1.00001	2.01984	0.396378	1.24706	7.4548	1.39793
IL18R1	0.897625	0.452918	0.119823	6.8421	0.157757	0.969241	1.82782	0.67816	1.30883	0.38234	0.583701	0.116842	0.0416635	0.190851	0.722199	1.97101	0.775797	0.706622	0.410454	0.897541	0.488909	0.37364	1.80101	0.619668	0.139046	0.661605	0.0413992	1.14057	0.977273	1.03637	0.139185	0.685772	0.886937	2.24712	0.802179	1.17015	0.790696	0.201609	1.16525	0.0877837	0.844936	0.324821	0.188492	0.258044	0.756539	0.263638	0.777971	0.789979	2.39028
IL18RAP	0.145641	0.0879774	0.389397	0.136794	0.439905	0.530121	0.211489	0.087498	0.0617646	0.0801622	0.160624	0.0734919	0.158982	0.165186	0.0913728	0.152248	0.220371	0.339402	0.0382474	0.287095	0.109191	0.631452	0.109052	0.0732439	0.153051	0.265506	0.0810118	0.315579	0.165494	0.396319	0.119159	0.568869	0.337477	0.316665	0.153145	0.137627	0.346939	0.315614	0.532672	0.0773006	0.0613889	0.569989	0.0230531	0.100038	0.146095	0.130959	0.380592	0.119252	1.222
IL19	0	0	0	0	0.0132724	0	0	0	0	0	0	0	0	0	0	0	0	0	0	0	0	0	0.0119075	0	0	0	0	0	0	0	0	0	0	0	0	0	0	0	0	0	0	0	0	0	0.00837491	0	0.0140758	0	0
IL1A	0.027733	0	0	0.0212247	0.0646624	0.0370136	0	0	0.00862495	0	0	0.0205251	0	0.0100291	0.0170127	0.0202479	0.0128221	0.00877682	0.0133524	0	0.0217823	0	0.00725157	0	0	0.0105931	0	0.0287401	0.0308132	0	0.0713127	0.0244425	0	0.0215706	0.0534638	0.0083559	0	0.0220365	0	0.0179907	0	0	0	0.00997821	0.0510025	0.0332497	0	0.0462574	0
IL1B	0.158551	0.11706	0.180506	0.0630982	0.665421	0.482468	0.14929	0.062868	0.142011	0.0153592	0.124569	0.0469373	0.0468634	0.061924	0.0700288	0.263929	0.114356	0.222788	0.201528	0.0701083	0.0448311	0.565139	0.432818	0.30991	0.00977499	0.0799409	0.0388051	0.36148	0.0845571	0.0513078	0.228311	0.620442	0.175509	0.155384	0.128375	0.200639	0.343832	0.181417	4.51217	0.0246849	0	0.486486	0.0386489	0.0342276	2.08541	0.359271	0.376373	0.958389	1.78391
IL1F10	0	0	0	0.0752765	0	0	0	0	0.0458845	0	0	0	0	0	0	0	0.0170534	0	0	0	0	0	0	0	0	0	0	0	0	0	0	0	0	0	0	0	0	0	0	0	0	0	0	0.013271	0	0.0110555	0	0	0
IL1R1	6.77508	9.4946	1.20454	5.41636	14.5817	10.4297	32.8886	5.91731	5.42883	2.11813	3.19329	11.799	2.91387	21.6387	20.8223	37.3233	12.8	6.21662	5.34937	6.71823	19.7689	6.78446	14.1259	10.1929	3.31987	3.33859	11.7715	26.4326	24.5092	7.27077	2.74438	6.87154	7.86134	6.55576	3.53113	7.1563	20.3994	6.03821	7.44008	9.27388	9.08984	4.17043	17.2556	3.41709	10.5194	4.31482	5.85052	10.0068	26.703
IL1R2	2.45358	11.7795	4.00086	5.33503	0.815655	1.99548	11.9574	1.54124	0.393453	1.42363	1.47648	1.61727	1.28659	2.55789	1.23468	3.19085	9.27009	1.15868	3.85769	1.61913	0.730193	5.2847	0.596446	0.889561	3.81123	3.38997	4.00729	8.43585	5.86746	0.796054	3.03955	6.06502	2.42899	2.02765	1.86614	4.62035	4.37626	3.22141	1.27855	3.17088	3.88689	0.670173	3.69357	7.40022	1.7485	3.89538	0.73468	8.34476	1.027
IL1RAP	1.29111	1.1489	0.406154	2.44557	1.52696	1.11552	1.42535	6.2814	1.64998	1.09438	2.54773	2.31342	0.633933	1.139	1.70389	0.872558	1.80493	1.58387	0.348433	2.31279	0.468341	1.01916	3.95386	0.953884	0.628414	1.64494	0.852355	5.31851	2.1744	4.33199	2.09244	1.94045	7.87098	11.5551	1.12742	1.91637	0.936361	0.98001	0.922682	0.340531	0.2237	8.96767	1.09443	0.738975	5.66485	9.78254	1.23502	0.654552	5.62112
IL1RL1	0.0136686	0.0201834	0	0.0183066	0.0119512	0.916696	0.0172369	0.0338739	0	0	0.094756	0.0126451	0.0126252	0.0074145	0.119485	0.0187115	0.00947937	0.29199	0.0345498	0.00290577	0.0201295	0.0128663	0.0482496	0.0252049	0.0263343	0.121387	0.0696951	0.00354125	0.0284751	0.28198	0	0.0225878	0.00497716	0.0159471	0.0197628	0	0.0247014	0.0570204	0.434143	0.00665024	0.0760513	0.00534945	0.00297492	0	0.0226236	0.0276541	0.266166	0.00683959	0.811
IL1RL2	0.267345	1.04175	2.14183	0.858203	0.168822	0.386543	0.187299	1.00608	1.41345	0.0269774	1.24414	0.566102	0.370405	1.11182	0.936172	0.626229	2.17338	0.444192	0.0107263	1.825	1.04115	0.0652431	4.56711	0.732628	0.0228921	0.493564	0.00757315	5.41793	1.31191	0.2283	0.114575	1.79664	0	0.710459	0.042949	0.396039	0.295248	0.0708103	0.0943489	1.64758	0.234142	3.03427	2.4115	0.705389	1.69623	0.0400657	0.17904	4.14704	0.111904
IL1RN	7.09175	31.9676	15.0697	26.8004	10.6297	11.5414	82.9722	6.97417	15.9732	17.9489	7.18349	12.7733	12.7666	14.0268	14.3718	2.65489	11.4089	17.4167	5.57453	17.4965	1.00176	14.3273	0.411549	2.61321	6.28318	20.171	3.92351	30.3783	1.56784	3.83462	1.00793	8.86525	29.1258	49.8966	3.11271	6.36658	27.964	4.10771	20.8265	1.22054	2.12501	4.51251	1.08674	17.093	5.40982	42.3876	17.7038	2.27522	12.7143
IL2	0	0	0	0.013429	0	0.0702564	0	0	0	0	0	0	0	0	0	0	0	0	0.0253445	0	0.0206728	0.0440451	0	0	0.027045	0	0	0.0363682	0.0292436	0.0851737	0	0	0.0255574	0	0	0	0.06342	0.020914	0.111465	0	0	0	0	0	0	0	0	0	0.0881363
IL20	0.0125303	0	0	0.33564	0.0438235	0	0	0	0.187052	0	0	0	0.0462952	0	0	0	0	0	0	0	0	0	0.0982919	0	0	0.0861508	0	0	0.020883	0	0	0.0331308	0	0	0.144936	0.0339782	0	0	0	0	0	0	0	0	0.041479	0.0338014	0	0.0752399	0.125877
IL20RA	0	0.00306484	0	0.416183	0	0.0110806	0.00697981	0.102875	0	0.00502666	0.00479623	0.00614452	0.0153371	0	0	0	0.0230311	0.00394122	0	0.52243	0	0.0208399	0.00651262	0.00382737	0	0.00475681	0	0	0.0553465	0.00671666	5.9349	0.312812	0	0.314803	0	0	0	0.0296864	0	0	0.00769892	0.136469	0	0.0134421	1.54364	0.0149308	0	0.00415437	0.255423
IL20RB	0.063518	0.0879299	0.165719	0.735251	0.236032	0.370885	0.0800999	0.209882	0.62966	0.192286	0.137603	0.217419	0.425352	0.0861377	0.109588	0.147819	0.62772	0.135688	0.550466	0.162037	0.11225	0.288983	0.548082	0.102486	0.330413	3.53918	0.0647745	0.279754	0.344041	0.0899266	0.32666	0.335889	0.173466	0.0555794	0.815059	0.452131	0.17218	0.520483	0.361461	0.185421	0.0441762	0.323165	0.131332	0.282812	0.586985	0.406943	0.117797	9.51916	0.239283
IL21	0	0	0.0518172	0.0209	0	0	0	0	0	0	0	0	0	0	0	0.119629	0	0	0	0.0232219	0	0	0	0	0	0	0	0.198103	0	0.0441861	0	0.0361028	0	0	0	0	0.0493512	0.0325491	0.0289127	0	0	0	0	0	0	0	0	0	0
IL21R	0.0323239	0.0344718	0.504295	0.744894	0.791348	0.258845	0.0664276	0.0178013	0.0268072	0.100028	0.0207483	0.0239228	0.0464433	0.0272751	0.0132193	0.342196	0.0597788	0.122757	0	0.161865	0.0211568	0.315534	0.0676159	0.0596053	0.0276782	0.1852	0.0219756	0.651345	0.0718279	0.0987903	0.193941	1.41494	0.0575428	0.0419023	0.0623142	0.0129855	0.843763	0.252564	0.18252	0.0209689	0.0466273	0.0281123	0.0125069	0.0891633	0.225893	0.135639	0.213143	0.212065	0.676499
IL22	0	0	0.0316269	0	0.0291475	0	0	0	0	0	0	0	0	0	0	0	0	0	0	0	0	0	0	0	0	0	0	0	0	0	0	0.0220356	0	0	0	0	0	0	0	0	0	0	0	0	0	0	0	0	0
IL22RA1	0.189473	4.53864	1.02529	7.62095	2.24569	10.6771	11.5279	16.8808	23.6686	8.52303	2.99185	1.92164	2.06122	5.16178	3.69356	3.91178	16.615	7.61536	2.85834	6.14037	0.231494	20.125	1.97071	2.78216	2.74728	1.62435	12.9601	3.33801	2.44433	0.953775	4.29466	6.0117	2.25887	10.0703	2.11043	1.61748	4.55274	1.7021	5.85458	0.122913	3.72228	45.7993	0.71479	8.69564	4.78539	6.05137	3.96937	4.4104	25.6166
IL22RA2	0	0	0	0	0	0	0	0	0	0	0	0	0	0	0	0	0	0.0128698	0	0.028817	0	0.00850647	0.00531665	0	0	0.00776656	0	0.00702382	0.0112957	0.0109664	0	0.0179206	0	0.00790748	0	0	0.0612418	0.028274	0.0574062	0	0.0125702	0	0	0	0.00747873	0	0.0125696	0	0.0255327
IL23A	0.446626	0.390813	0.313871	0.784902	1.27276	1.92072	1.58536	0.601245	0.447567	0.380578	0.382244	0.489698	0.0611158	0.340973	0.350085	0.217388	0.160606	0.581089	0.334496	1.15343	0.915959	0.477502	0.298445	0.488046	0.280452	0.511788	0.573544	0.565699	0.358388	0.695884	0.467888	0.874741	0.457773	0.289486	0.932757	0.882163	0.538082	0.522472	0.893175	0.257538	0.490863	0.543805	0.417626	0.767759	0.27379	0.713959	0.674903	0.513188	0.540067
IL23R	0.0130378	0	0	0.129716	0.0113996	0.0261012	0	0.0107702	0	0	0.00753193	0.0241232	0.0240852	0	0	0	0.0361676	0.00618923	0	0.0110867	0	0.0163634	0.00511366	0.0420731	0.0301428	0.0149401	0.0332394	0.0405339	0.0108644	0	0	0	0.0284848	0.0152111	0.0094254	0	0.0471228	0.00776986	0.0207054	0.0253733	0.0604514	0.0204103	0	0	0.0791251	0.0117235	0	0	0.106418
IL24	0.029765	0.153831	0.545952	0.0759326	0.694001	0.251595	0.166824	0.0163921	0.111083	0.264312	0.137561	0.095459	0.201614	0.0215279	0.0639071	0.260777	0.192662	0.273177	0.272283	0.261543	0.116892	1.46938	0.287967	0.109773	0.183507	0.272862	0.0607077	0.740302	0.18189	0.321069	0.127563	0.865702	0.158962	0.0578777	0.0860717	0.116586	0.69927	0.437546	1.09246	0.0579266	0.423227	0.186385	0.112289	0.107093	0.218958	0.151665	0.294404	0.377315	1.74424
IL25	0	0	0	0.0109927	0	0	0	0	0	0.0695716	0	0	0	0	0	0	0	0	0	0	0	0	0	0	0	0	0	0	0	0	0	0.018989	0	0	0	0	0	0	0	0	0.0266393	0	0	0	0	0	0	0	0
IL26	0	0	0	0.0559147	0	0.0487547	0	0	0	0.0442346	0	0	0	0	0	0.020003	0.0506683	0	0	0	0	0	0.0143278	0	0	0.02093	0	0.0189284	0	0.0295533	0	0.0965877	0.053207	0	0.0264087	0	0	0.010885	0.0193379	0	0	0	0	0	0	0.0492715	0	0.0182792	0.0458719
IL27	4.68457	6.5064	1.34945	3.31306	3.54172	2.47612	5.51108	1.53259	10.7176	2.1904	2.8581	11.0991	5.398	3.32108	3.47122	5.11337	0.192998	7.20725	14.2249	0.499582	1.38433	2.8136	1.89194	1.72482	11.7241	4.39365	12.3767	1.29779	4.99872	4.92807	0.675842	10.935	1.95913	1.1003	9.41094	2.8788	2.0396	1.7506	1.91513	2.31681	3.957	1.64581	3.00152	4.12193	1.00653	0.500474	7.7129	0.278506	1.59197
IL27RA	1.61747	0.709664	1.99993	0.933485	1.87792	3.20271	1.10346	1.75232	0.841134	0.78665	0.467203	0.706475	2.44917	0.58972	1.02476	1.86575	1.0114	1.06364	1.05322	2.31114	3.10052	3.1532	5.34558	3.92384	0.827594	1.73951	0.554328	2.39065	4.22026	1.71613	1.58525	3.29513	0.753108	1.26837	1.2364	0.76696	3.66575	3.17621	2.50553	0.283818	0.934372	0.518872	2.92015	1.43104	1.57996	1.13253	3.77418	11.2846	4.03721
IL2RA	0.0247292	0.146063	0.797684	0.146675	1.09191	0.313544	0.06237	0.0612844	0.0230723	0.0898342	0.050001	0.036604	0.0342622	0.0469499	0.0455099	0.609349	0.1029	0.446092	0.0892961	0.178742	0.0582691	0.279331	0.417066	0.0684009	0.0190575	0.276288	0.0063046	0.576613	0.319405	0.110034	0.143074	1.04616	0.0720372	0.0721284	0.0804483	0.00558814	0.904963	0.280008	0.562905	0.0721894	0.0573298	0.0677474	0	0.120116	0.422949	0.161213	0.0802577	2.07886	1.03251
IL2RB	1.17392	0.330032	1.68843	1.79366	2.03823	1.54446	1.13795	0.483147	0.370286	0.586815	0.64197	0.204063	0.316418	0.226615	0.538179	3.05163	0.214397	0.749645	0.168956	0.689177	0.644766	1.32654	2.43488	1.3905	0.244683	0.856904	0.42177	4.88785	0.661434	0.655674	0.504894	3.54575	0.772776	0.745728	0.972485	0.551319	4.65815	1.31703	1.77363	0.365862	0.705074	0.385859	0.0909248	0.369763	1.19393	0.672416	1.71998	0.61459	3.30497
IL2RG	2.77451	1.74906	21.9355	4.21411	14.5927	4.89932	3.18183	1.3164	0.524359	3.66979	2.14532	0.721324	5.41455	1.18086	0.621886	4.86161	5.57512	3.01919	1.9729	4.7065	1.57571	17.8128	3.65527	1.56109	1.71054	5.38037	0.79078	16.8756	4.96782	3.29209	3.38425	17.1266	2.95314	3.1955	2.2732	1.72335	11.4421	5.54545	10.6125	1.67525	1.26664	2.7731	0.247737	44.9138	10.6681	4.50346	4.43302	2.33524	11.2829
IL3	0	0	0	0	0	0.0499155	0	0.0308951	0	0.0226439	0.0648176	0.235277	0	0.0608624	0.0172071	0.0204793	0	0.0177543	0.0270099	0	0	0	0.0586756	0	0	0	0	0	0	0.0302569	0	0	0	0	0	0.0338056	0	0	0	0.0363926	0	0.0585485	0	0	0	0	0	0.0187144	0
IL31	0	0	0	0.0332457	0	0	0	0	0	0.052602	0	0	0	0.047128	0.0199861	0	0	0.0206216	0	0	0	0	0.187418	0	0	0	0	0	0	0	0	0.0861436	0	0.0253407	0	0.0785307	0	0	0	0	0	0	0	0.0234444	0	0.136714	0	0	0
IL31RA	0	0.0158399	0.0325669	0.0328389	0.00750344	0.00572676	0	0	0	0	0	0.00317565	0	0	0	0.0469914	0.0476123	0	0.0309882	0	0	0.016156	0.00673179	0.023737	0.0066135	0	0.017503	0.0222334	0	0	0.0110335	0.0567263	0	0.0200245	0.00620396	0.131868	0.00775426	0.00255713	0.00454288	0.29227	0.0238741	0	0.00373555	0.0046315	0.00473468	0.0154332	0	0.0687068	0
IL32	341.651	319.258	217.618	55.1773	55.5535	169.932	249.599	11.5041	87.9548	34.3416	59.6599	75.4892	352.911	203.234	66.7634	97.9139	174.116	156.711	334.36	59.0858	72.0513	190.972	64.0524	82.5176	34.8845	286.621	20.872	46.6565	41.0651	66.4799	51.5593	78.9093	26.1212	19.7598	226.628	43.2112	83.3735	223.322	171.132	135.821	16.0461	100.748	14.1055	263.069	67.1312	7.75219	295.284	61.0386	114.26
IL33	0.500985	1.37258	0.0572649	1.88012	0.55942	2.51342	3.19692	2.58282	0.726468	0.226578	1.96665	1.1302	0.735926	0.0392902	2.79926	0.806455	0.184185	1.33525	0.828233	0.610787	1.20891	2.96204	1.81817	1.66398	0.567496	1.45249	2.4683	2.80231	1.37815	3.13498	1.39688	1.40443	1.29235	2.23939	0.593444	1.01479	3.44691	2.96042	2.56258	0.939742	0.503755	0.330719	0.178663	0.76227	13.0541	0.206245	2.75372	37.6814	10.3612
IL34	0.307759	0.70114	0.483851	0.989243	0.661189	2.58184	1.10886	0.682792	0.730151	0.340723	0.477496	0.364434	1.65686	0.0190791	0.347918	0.231114	0.048785	1.23556	1.99399	0.142067	0.124314	4.44748	0.448344	0.299967	0.460795	2.25703	0.511122	1.65846	1.05513	0.810962	2.28367	2.6853	4.07273	1.72348	15.5105	0.92197	2.08166	1.97556	4.10551	2.68667	0.50555	0.371664	0.650685	1.7179	2.6197	1.16228	0.701211	0.439994	4.59335
IL3RA	2.31946	3.95904	2.41841	2.46057	2.81111	9.70068	2.47126	3.79414	3.97456	3.37871	2.98502	1.75911	8.01808	1.50732	2.55691	2.87968	2.4686	1.61346	5.92086	4.53053	3.49022	5.10158	3.30565	2.99607	4.03512	4.38153	2.28337	3.34374	2.60258	3.75292	4.10411	8.06063	1.75607	2.92043	4.13388	1.77479	2.98808	4.17419	7.41568	0.715083	4.15269	1.1684	3.45876	5.30463	5.48616	1.71394	1.51193	3.21757	4.32564
IL4	0	0	0.0455459	0.0551115	0	0	0	0	0	0.0290661	0	0	0	0	0	0	0	0	0	0.0204114	0.0282797	0.150631	0.0188293	0.0221313	0	0	0.0244785	0	0	0	0	0	0.0699237	0	0	0	0	0.0429147	0	0	0	0	0	0	0.609187	0	0	0	0
IL4R	7.12909	12.0839	5.63842	22.7191	2.25448	10.8442	12.6703	5.70202	17.2657	17.8422	5.1269	3.07451	13.3913	3.42984	7.82289	5.05659	8.405	9.90928	5.71636	7.69107	3.24974	7.21653	12.7787	4.73933	2.45948	11.0285	2.13687	13.6885	6.44589	9.14716	11.316	10.9355	6.78821	8.09203	10.7652	7.92243	11.5108	8.02859	8.1474	3.27404	2.06979	10.7692	7.02142	7.77055	13.7957	6.64707	10.7809	18.0865	31.9768
IL5	0.0123724	0.0182693	0.0469522	0.0378754	0	0.0330254	0.0416062	0	0	0.0149818	0	0.00915677	0	0.0671136	0.0341539	0	0.0343216	0.03524	0.125093	0.0210417	0.0728823	0	0.029116	0.0114073	0	0.028355	0.126171	0	0	0	0	0	0.0180207	0	0.0178887	0.0447333	0	0.00737329	0.0130991	0	0.0229464	0.0387372	0.0107712	0.0267092	0.0136521	0.0222503	0.0229452	0.0247639	0.0155363
IL5RA	0.00595	0	0.0225797	0.00227683	0.0208095	0.00397055	0	0.00491513	0.00555133	0.00360244	0.0034373	0.00220179	0	0.00322755	0	0.0228065	0.0247584	0	0.00859407	0	0.00350497	0.00746765	0	0	0.00917072	0.00340905	0.00303385	0.00616607	0.00495812	0.0048136	0.0152998	0.0511293	0.00433315	0.00347091	0.00860282	0.00268908	0	0.0088647	0.0125989	0.00578973	0.00551756	0	0.00258998	0.00321117	0.00328271	0.0160506	0.0110346	0	0.0560366
IL6	0.0379604	0.0490464	0	0.101681	0.0165953	0.265983	0.0797837	0.015679	0.0265627	0.0114916	0.0657888	0.0421415	0.122719	0.0308872	0.0174649	0.0831445	0	0.243274	0.0822439	0	0.0670841	0.34541	1.5782	0.166247	0.0146271	0.108747	0.0290335	0.0196694	0	0.0767757	0.0732084	0.175646	0	0	0.0548851	0.017156	0.0514502	0.130078	0.180854	0	0	0	0.0082619	0.0819477	0.0523583	0	0.175998	4.94815	0.440926
IL6R	18.2931	12.2053	4.44561	32.3409	16.117	8.95045	12.1355	24.5021	19.0774	15.7992	7.3687	79.9035	10.2471	18.2814	62.0979	46.3255	7.09027	10.4895	7.50653	10.2332	21.1934	7.75615	42.5838	32.2653	9.05134	12.995	32.0288	9.42826	12.5762	12.4608	2.94189	14.7711	33.3364	54.7974	7.21061	21.3179	16.4303	6.71838	12.7281	28.2106	14.0912	18.6485	15.1389	8.59507	10.2739	8.27923	3.90493	8.12742	8.58933
IL6ST	13.376	16.4204	5.29659	24.229	11.5992	32.2522	23.3184	30.5791	11.078	21.3222	6.70428	31.2765	8.70503	14.1722	23.154	56.637	14.2033	15.7971	19.8877	7.61336	15.0368	10.1787	20.9404	28.4001	10.5687	9.16261	16.9958	15.0048	11.0194	22.3708	8.66122	4.94184	13.533	13.7073	22.7952	19.4116	34.6281	12.4834	16.0453	13.9122	11.3457	18.6141	12.6088	9.61153	15.6875	15.0943	19.1672	20.2211	45.0879
IL7	0.740943	0.747914	0.615084	1.27145	0.951521	1.36745	1.80061	0.478182	0.610286	0.581786	0.428041	0.287037	0.171096	0.728483	0.314263	1.12207	0.570056	1.39045	0.384605	0.639904	0.675162	0.32693	1.60744	0.576407	0.240894	0.530654	0.5667	1.39773	2.08381	0.346545	0.133964	0.48212	2.07409	0.844192	0.845318	1.02553	1.16116	1.24189	0.710918	0.754782	0.203981	0.734014	0.0705525	0.474859	1.73097	1.58755	1.03059	2.39834	2.00622
IL7R	0.243007	0.492793	0.38732	0.327322	0.464609	2.3784	1.50908	0.669139	0.045345	0.0588517	0.108564	0.232605	0.436943	0.179273	0.0804985	0.61742	0.561762	0.879802	0.0701991	0.950547	0.160327	4.18854	0.177915	0.361471	0.45445	1.14355	0.10243	1.93743	0.728991	2.89388	0.349926	1.57632	0.632382	1.1076	0.0890094	0.0527166	4.93607	1.64129	6.87795	0.0441396	0.126194	1.09561	0.0394908	0.402191	0.557736	0.399145	0.78116	0.0907928	12.7878
IL9	0	0	0	0.0762795	0	0	0	0	0	0	0	0	0	0	0	0	0	0	0	0.0847541	0	0	0	0	0	0	0	0	0	0	0.256291	0	0	0	0	0	0	0	0	0	0	0	0	0	0.109979	0	0	0	0
IL9R	0.0156829	0.0115788	0.0148788	0.00600123	0.0137123	0.0313965	0.0131847	0	0	0	0.00905997	0.00580343	0	0.0340285	0.00721543	0.00858756	0	0	0.0113261	0	0.0184767	0.0196831	0.0061511	0	0	0	0.0159931	0.0243786	0	0	0.040327	0.0621996	0.0114212	0	0.0226752	0	0.0708536	0.00934617	0.024906	0	0	0	0	0	0.0605676	0.0141019	0	0.0392375	0.11816
INHA	0.0112008	0.0165393	0	0.137155	0.293803	0.029898	0.0376663	0.055516	0.104503	0.0542524	0.0647067	0.25698	1.2208	0	0.103066	0.0245331	0.0155358	0.0212686	0.0161782	10.5056	0	0.056231	0.00878628	0.0722898	0	0.012835	0	0.0928603	0.149338	0.0181231	7.71886	0.0148077	0.0489426	0.235222	0.0323894	0.111368	0.0607247	0.153527	0.0355759	0	0.0623204	0.0701379	0.0682584	0.0362699	0.0741559	0.0906449	0	0.190561	0.210977
INHBA	1.61887	0.406108	0.00494643	0.656387	0.077497	1.65612	2.32311	20.0057	2.24493	0.0473502	2.12645	0.154347	0.659758	2.11831	0.796387	1.37036	0.11209	1.14594	0.696586	0.237192	4.82497	0.30755	0.676869	0.348513	1.73175	0.191182	3.80158	1.59661	0.78203	0.324784	0.797695	0.803001	0.280976	0.273728	0.305302	1.89214	1.55935	0.470728	0.582357	1.1973	0.135375	0.759063	0.991771	0.275755	1.07582	0.876686	3.89184	0.159142	1.32905
INHBB	1.2134	3.47487	3.09308	1.79631	8.05882	4.08952	6.2031	51.0189	12.7332	2.04071	13.8213	7.24775	10.7888	0.904198	10.9172	2.39596	2.72002	8.33768	16.2338	26.6812	22.5264	15.4674	9.03758	10.792	3.70263	3.98169	2.94977	13.9591	17.4138	10.6494	26.6944	25.5853	9.12233	11.9974	1.34681	15.1168	12.005	17.3403	9.53766	1.6697	17.06	91.4368	28.4311	1.10467	9.02745	29.0568	4.93249	3.91286	11.2353
INHBC	34.9428	14.8533	0.130922	48.4155	5.53301	35.5723	7.47467	81.9465	51.4819	4.61915	8.35926	15.378	1.72985	74.9522	41.4408	27.6887	0.478513	17.6781	10.0514	4.29987	11.369	7.05153	11.4667	16.9674	1.24578	1.46836	30.3065	6.60902	36.5348	10.9727	0.70969	18.9342	33.796	6.67	9.09256	87.3409	20.1465	13.9806	9.70534	2.26358	10.1826	2.80839	5.50059	1.47888	7.36335	5.49522	20.0168	0.424175	70.775
INHBE	18.4041	18.3721	1.33456	71.1431	2.30044	15.0628	3.27407	14.8589	71.4061	3.90354	112.761	0.775993	3.58512	179.515	39.8023	1.88287	1.92401	29.2521	2.86897	15.3564	7.90276	23.4826	1.55811	0.864642	2.9109	6.68649	11.5292	102.125	6.30594	10.748	5.59319	61.8772	80.1335	20.2563	54.3493	57.7941	46.158	91.7289	8.28771	1.30543	6.54641	5.9131	2.50597	4.4426	77.4798	146.65	77.6351	4.09948	155.534
INPP5D	0.877592	0.726422	1.6094	0.662984	1.81547	1.55163	1.12951	0.691323	0.251124	0.416308	0.423357	0.780073	1.16994	0.422062	0.322596	1.33265	0.655679	0.800997	0.931082	0.792418	0.73814	2.25113	1.26327	0.802883	0.630995	1.20261	0.454396	2.20802	0.893387	1.17842	3.7979	3.80055	0.846664	1.17429	0.686759	0.554048	2.71818	1.25897	2.49047	0.40937	0.654404	0.846259	0.356409	0.537106	1.52492	0.825732	1.24582	1.38078	4.76024
INS	0	0.0186813	0	0.135553	0	0	0	0	0	0	0.0292347	0	0	0	0	0	0	0	0	0.301227	0	0	0	0	0	0	0	0	0	0	0	0	0	0	0	0	0	0	0	0	0	0	0	0	0	0	0	0	0
INSL3	0.021273	0	0.605469	0.0162807	0.223201	0.141959	0.0357687	0.0702923	0	0.128798	0.0737362	0.0472323	0.0785964	0.0230789	0	0.0465943	0	0.0403943	0.0614528	0.144716	0	0.453884	0.150185	0	0.0655761	0.0975069	0.0216938	0.0881821	0.070907	0.0688403	0.492312	0.449975	0	0.0992762	0.0307576	0	0.0384437	0.101421	0.0900898	0.0414001	0	0.0666044	0	0.0918471	0.14084	0.114771	0.0394519	0.276763	0.213704
INSL4	0	0	0	0	0	0.013425	0	0	0	0	0	0	0	0	0	0	0	0.00955019	0	0.00855357	0	0	0.00789054	0.0185486	0	0	0	0	0	0	0	0	0	0	0	0	0	0	0	0	0	0	0	0	0	0.00904489	0	0.0201334	0
INSL5	0	0	0	0.105084	0	0	0	0	0	0.0332533	0	0	0	0	0	0	0	0	0	0.0233518	0	0	0	0	0	0	0	0	0	0	0	0	0	0	0.0397053	0	0	0	0	0	0	0	0	0	0	0	0	0	0
INSL6	0	0	0	0	0.639229	0.0232319	0	0.0287588	0.0162406	0	0	0	0	0	0.0160172	0	0	0	0.0251422	0.0444058	0	0	0.0136546	0	0	0	0.0177513	0	0	0.0281647	0	0.0230124	0	0	0.0251678	0.031468	0	0	0	0.203257	0	0	0	0	0.0384147	0.547825	0	0.0174203	0.0218583
INSR	13.7676	13.2372	4.41332	10.9464	7.63527	11.6322	17.5892	27.16	7.53214	18.605	11.6502	17.6103	12.0156	9.64505	11.4964	17.0713	10.0197	7.42753	11.0202	12.5348	20.4855	14.3412	13.0797	15.8013	9.40536	14.7235	16.2337	8.85297	6.61924	8.05568	20.0006	8.6808	14.1256	13.1801	7.73636	17.8176	14.6945	7.77705	10.0072	12.0805	6.62392	41.4908	10.2733	14.0392	4.89664	6.42806	14.5259	4.34518	14.8253
ITGAL	4.31715	4.164	6.09045	3.77766	4.94982	5.5027	3.96868	1.12276	3.6401	3.15202	1.98048	3.39045	5.39712	2.05053	0.829115	7.29954	7.6754	4.08729	1.2927	1.76459	0.739879	4.17701	1.48502	4.42796	2.25385	4.15786	1.75421	9.58608	5.66292	1.76717	2.10632	9.99894	5.24517	4.58726	3.39075	2.71758	7.67566	5.20886	2.78804	2.62148	1.50232	2.66915	0.491264	5.12815	3.11665	11.9295	9.59302	1.52113	6.29356
ITGB2	7.49348	3.27386	11.6314	2.0804	11.8308	9.98953	4.41035	1.70385	0.450101	1.53563	1.76229	1.7061	1.95316	4.53491	1.04465	8.65255	3.09325	4.79968	2.44091	3.8984	3.10729	10.7173	5.83961	2.77265	1.33574	4.10801	1.06348	11.837	3.88524	3.92624	2.60729	25.8968	2.99578	5.04198	4.76566	1.69724	15.7345	4.84962	8.07428	1.72593	1.97697	1.57375	0.774593	1.93322	15.2716	3.0885	4.56984	17.453	9.07238
ITK	0.125514	0.0353825	0.216507	0.171159	0.339207	0.271072	0.276272	0.11688	0.0106459	0.0718478	0.0580074	0.0641804	0.0590204	0.0792259	0.0608968	0.47985	0.0506448	0.171166	0.016481	0.149423	0.0752812	0.366613	0.100248	0.0841629	0.0633125	0.128137	0.0325811	0.645631	0.193968	0.265856	0.105626	0.319798	0.13628	0.149099	0.102286	0.0577571	1.10525	0.216239	0.463893	0.0266473	0.0465568	0.228641	0.00794694	0.0763605	0.105761	0.137486	0.279327	0.0274061	1.64489
JAG1	1.1435	2.28475	0.279402	1.07764	3.91477	4.08715	1.884	5.34836	1.2107	1.1785	1.00751	1.98548	1.3431	1.288	1.06491	1.41356	2.65513	1.36527	2.03382	1.43018	1.81073	3.28904	7.74629	9.3084	1.2199	1.56343	2.69591	7.96372	4.84297	2.56496	67.4572	1.99536	0.851194	2.25751	1.67329	1.95281	4.29095	2.73545	4.71839	2.00151	1.80074	0.410608	0.987494	1.39321	6.51703	1.10477	1.60437	2.27034	18.5253
JAG2	0.770421	1.26679	0.681415	0.591968	0.751446	4.49801	0.593507	1.37427	0.535521	0.486895	1.35472	0.997257	0.884551	0.602726	0.316328	0.890787	0.387418	1.22395	1.28125	1.31547	0.57136	1.6642	3.79701	1.48291	0.851556	1.2451	6.72977	0.521662	2.55261	1.44024	2.92029	1.87878	0.295063	0.411821	1.19824	0.726897	1.56977	5.6504	4.09135	1.38584	1.35485	0.490116	0.625288	1.33186	1.96778	0.400198	0.637545	1.49288	4.20507
JUN	55.1277	41.2051	8.37746	5.01327	35.8003	23.6739	44.868	14.9187	15.5301	11.5187	20.7444	98.4098	5.08221	109.506	63.9659	28.4463	15.8712	32.3285	41.8116	2.64126	44.6777	17.2781	78.8522	33.7266	28.5365	13.8494	46.167	25.6649	151.434	23.0286	29.9941	49.1881	40.0545	14.7284	17.8596	18.3696	21.6008	20.1965	23.3016	21.265	37.28	66.2082	40.2672	10.7346	69.8204	38.1541	33.2458	31.629	50.761
KDR	4.73072	2.54312	0.255956	2.32405	1.73352	4.81909	4.85802	10.6457	1.15319	1.45111	2.04063	3.58013	0.851897	0.929127	7.18194	5.35606	0.748408	2.44231	4.66708	1.69126	6.2646	2.90175	3.78968	5.75585	1.65847	1.98432	6.28631	2.94866	2.31089	3.70538	1.17774	1.999	2.9837	3.90157	4.61286	2.68814	5.98667	2.37618	8.52918	1.50798	6.56871	0.162063	3.78528	1.26979	2.0804	1.16501	4.53212	0.784876	11.1561
KIR2DL1	0.0234588	0.00865993	0.11128	0	0	0	0.0197219	0	0.0328305	0	0.0135521	0.0173618	0	0.0127251	0.0215859	0.0256909	0	0.0334085	0	0.0199481	0.0276378	0.0147212	0.193219	0	0.0180785	0	0.0478457	0.0486213	0.0195481	0.0189784	0	0.0620262	0	0.0136846	0.016959	0	0	0.00699009	0.0124183	0.0228269	0	0	0.0204228	0.0253211	0	0.0843757	0.0435055	0.0234769	0.0147289
KIR2DL3	0.0230008	0	0.0727383	0.017603	0	0.0204652	0	0	0.00715322	0.0185678	0	0	0	0.00831779	0.00705484	0.00839643	0	0.00727917	0.011074	0.0130391	0	0.0096225	0.144341	0	0.011817	0	0.00781859	0.103289	0.0255553	0.0744314	0	0.0608152	0.011167	0.0268348	0.0221705	0.0346504	0.0138553	0.0182763	0.00811722	0.0149208	0.0284388	0	0	0	0	0	0.0568748	0.0767284	0.00962754
KIR2DL4	0.0797244	0.0168175	0.497042	0.0784476	0.418243	0	0.0765998	0.0376333	0.0212522	0.165495	0.0263181	0.0168582	0.0210396	0	0.0419198	0.0374187	0.0473913	0.0648792	0.0164504	0.0484239	0.0670906	0.142942	0.294824	0.0210017	0.0526625	0.0652544	0.0696871	0.80259	0.0759248	0.0921398	0.0292862	0.6625	0	0.0398631	0.0329342	0.0308839	0.0411641	0.0339368	0.168814	0.0443298	0.0422458	0.106977	0.00991523	0	0.0125672	0.0307232	0.0422437	0.125378	0.0715085
KIR3DL1	0.0138177	0.00510089	0.131093	0.0052875	0.0241631	0.00922084	0.0116166	0.0114145	0.00644595	0	0	0.0204529	0	0.00749537	0.0317865	0.0453974	0	0.00655945	0.0299371	0	0.00813963	0	0.0975518	0	0.0106486	0	0.00704554	0.0214793	0.0115143	0.0558934	0	0.00913369	0	0.016121	0.0299676	0.00624487	0.0124854	0	0.0146293	0	0.0128135	0.0216312	0.00601473	0.00745733	0	0.0186372	0.0256257	0.0138284	0.00867562
KIR3DL2	0	0	0	0	0	0.0139614	0	0	0	0	0	0.0154841	0	0	0	0.0229124	0	0	0	0.0177907	0	0.0393872	0.00820583	0	0	0	0.0320033	0.0433628	0.017434	0.0169258	0.026899	0.0414885	0.0152364	0.0122046	0	0.00945548	0.0378087	0.0062341	0.0221505	0	0.0194011	0	0	0.0225825	0.0115428	0.0188126	0.0776006	0.0104689	0.0525437
KIR3DL3	0.0116115	0	0	0	0	0	0	0	0	0	0	0	0	0	0	0	0	0	0	0	0	0	0.00910842	0	0	0.0133056	0	0	0	0	0	0	0	0	0	0	0	0	0	0	0	0	0	0	0	0.0104409	0	0	0
KITLG	0.201551	0.523226	0.333088	0.45529	0.71059	0.65948	0.229571	0.784143	0.321499	0.53142	0.277943	1.07545	0.234208	0.282144	0.559373	0.687107	0.121742	0.367284	0.366244	2.70352	2.74224	0.387601	5.79373	1.37874	0.696458	0.379962	2.04875	0.303199	1.63618	0.173577	0.259134	1.92966	1.01327	1.08092	0.686231	0.866828	1.69193	0.329344	0.495613	1.46143	1.60375	0.117048	0.608474	0.347381	7.60458	1.68664	0.247182	5.0687	1.23689
KL	0.054369	0.0430085	0	0.106997	0.0747019	0.0725631	0.28731	0.23098	0.0181165	0.0141077	0.0179479	0.158079	0.746107	0.113756	0.0821897	0.131844	0.00538651	0.0331839	0.22998	1.32754	0.164712	0.0146222	0.121854	0.282866	0.0957702	0.0267006	0.36435	0.128785	0.0582501	0.106821	0.0998603	0.0359386	0.124441	0.149518	0.0673797	0.105308	0.119308	0.0231436	0.18091	0.037789	0.100835	0	0.0608563	0.0125754	0.0599926	0.0349201	0.0504151	0.015546	0.224324
KLRC1	0.0145552	0.00537313	0.165707	0.172661	0.101811	0.0679909	0.0856566	0.0120237	0.02037	0.00881249	0.0420425	0.00538613	0.0941089	0.0236863	0.0535728	0.0478204	0.0504711	0.0414573	0	0.037131	0.0257222	0.173544	0.216934	0.0939393	0.0448679	0.0500365	0.0222647	0.135754	0.0121288	0.0706519	0.0187136	0.153939	0	0.0169815	0.115746	0.0328909	0.170973	0.0477077	0.107871	0.0283264	0	0.102536	0.0126715	0.109975	0.00803035	0.0261759	0.0809802	0.670057	0.054832
KLRC2	0	0	0.0745628	0	0.0687172	0.0174821	0	0	0.0122211	0	0	0.00969432	0	0.0142107	0	0.0430352	0.0181683	0.0373088	0.0378392	0.0222769	0	0.115078	0.0513754	0.024154	0.020189	0.0150098	0	0.0950208	0.0218303	0.021194	0.033682	0.0692674	0.0190786	0	0	0.0236797	0.0236714	0.0390307	0	0.0254918	0.0242935	0.0410113	0	0.0141386	0.0722678	0.0117783	0	0.589898	0.0164484
KLRC3	0	0	0	0	0.0299092	0	0.0287583	0	0	0	0	0.0126584	0	0	0	0.0374621	0	0	0	0	0	0	0.0134167	0.0157695	0	0	0.017442	0.0177248	0	0.027674	0	0.0226115	0	0	0	0	0.030909	0	0.0181082	0	0	0	0	0	0	0	0	0.0171169	0
KLRC4	0	0	0	0.0161581	0.0369201	0.0281781	0.0354995	0	0	0	0	0.0156256	0	0.0229052	0	0.0231218	0	0	0	0.0179533	0	0	0	0.0194661	0	0	0.0215306	0.0656388	0	0	0	0.0558235	0	0	0.0305261	0	0	0.0125822	0	0	0	0	0	0	0	0	0.0391549	0.0211292	0
KLRD1	0.0462557	0.00916248	0.254742	0.0561227	0.301848	0.043666	0.0815688	0.0316868	0.015789	0.101094	0.0469261	0.0375736	0.0521033	0.0232553	0.051906	0.176682	0.0328613	0.0449875	0.0293316	0.0613985	0.0319	0.158587	0.080534	0.0520094	0.0765105	0.0685179	0.0333647	0.1251	0.056407	0.115002	0.0406143	0.237147	0.042724	0.0460687	0.0880845	0.0805612	0.126406	0.0578212	0.0967505	0.0351296	0.0397554	0.0264921	0.0196436	0.0231373	0.0174283	0.0365205	0.138091	0.018065	0.110502
KLRK1	0.0129604	0.00956879	0.0122959	0.0198377	0.101987	0.0345949	0.0762711	0	0.006046	0.0627752	0.0224615	0.00959194	0.0239421	0	0.0119257	0.0851614	0	0.0246099	0.00935988	0.0551042	0	0.0325323	0.0254164	0.0179242	0	0.00742565	0.00660839	0.0537241	0.0863989	0.0314552	0.0333263	0.0771028	0.00943854	0.00756039	0	0.0527166	0.0936858	0.0463422	0.0274432	0	0.0120184	0.0507227	0	0	0.0286018	0.0291347	0.0480714	0.0518816	0.162747
KRAS	0.836275	1.34405	1.16331	3.75162	1.78685	2.04204	1.66384	5.81537	1.76119	3.13238	1.3608	6.63702	1.85286	3.45696	3.47394	4.47616	1.50307	1.85603	2.01187	2.90852	2.81953	2.97663	6.67182	3.66184	1.23507	1.39275	3.04931	5.83522	4.04227	1.64462	3.07002	4.37254	4.50405	2.5035	1.70678	3.50243	2.8865	1.69063	2.42842	2.03045	2.21428	2.85827	2.04134	1.27418	6.33183	2.62586	2.32887	1.76265	3.84598
LACRT	0	0	0	0	0	0	0	0	0	0	0	0	0	0	0	0	0	0	0	0	0	0	0	0	0	0	0	0	0	0	0	0	0	0	0	0	0	0	0	0	0	0	0	0	0	0	0	0	0
LAT	0.0221614	0.0294516	0.0672804	0.115332	0.0930087	0.0709859	0.0521674	0.00732277	0.0827061	0.0644048	0.0256051	0.0951291	0.00818787	0.0865538	0.0367059	0.0825181	0.0430338	0.033665	0.0320095	0.0791485	0.0417749	0.116819	0.0556292	0.0326924	0.0546517	0.0711052	0.0271198	0.192916	0.0738682	0.0358576	0.0227943	0.0410171	0.04519	0.0413688	0.0640842	0.0600946	0.120147	0.105656	0.0563112	0.0172516	0.0246609	0.0416315	0.0308693	0.0382731	0.0929236	0.0637675	0.0739789	0.248399	0.189234
LCK	0.876195	0.308256	4.82025	1.15212	4.42179	1.77373	1.40403	0.330325	0.142649	0.811763	0.421246	0.178438	1.01028	0.4402	0.15692	1.64221	0.668825	1.06637	0.314267	0.705066	0.505749	4.8637	0.631962	0.422902	0.290035	1.39486	0.299842	4.34505	0.529223	1.24643	0.846782	3.92596	0.753727	1.24865	0.841731	0.281713	4.62274	1.74522	2.87013	0.320438	0.523499	0.451081	0.112628	0.761679	0.804603	1.08398	1.29778	0.247172	4.72594
LCP2	1.29563	0.860517	1.75894	0.821469	2.83919	2.48527	1.50853	0.582162	0.232659	0.51202	0.469758	0.587771	0.786133	0.485202	0.476378	2.23225	0.718075	1.00879	0.908286	0.958831	1.08575	2.20782	1.77965	1.3895	0.568169	1.00323	0.326168	3.41849	1.16547	1.17097	0.968805	3.3612	1.0383	0.822208	0.748531	0.624755	3.48761	1.26803	2.98737	0.559152	0.57811	0.916537	0.316203	0.482739	2.47046	0.748243	1.38237	2.03717	4.63238
LECT2	20.7815	3.34591	0.154165	18.523	14.8236	11.4702	32.9993	19.4938	0.101073	24.6178	84.4134	36.1992	40.9251	81.6522	34.5317	37.8952	188.473	17.8277	146.549	7.1776	26.5788	48.5387	0.36824	67.994	123.642	26.3169	46.1321	35.1576	89.7755	8.41352	3.18025	15.169	118.471	96.3189	50.657	27.7113	60.999	6.83254	14.3271	8.96011	139.1	15.8707	65.5147	12.0634	0	36.4071	13.8625	0.144553	1.98383
LEFTY1	0.0726837	0.091994	0.0394041	0.166879	0	0.124723	0	0.0857744	3.03224	0.0125733	0.15596	0.0461083	1.13171	0.0112649	0.219752	0.125085	0.100814	0.236598	0.0149976	6.48967	0.0244662	0.0390956	0.00814508	0.00957348	0.0320078	0.618713	0	1.17289	0.190354	3.46091	2.32289	19.5748	0.0453709	0.157485	0.255218	0.366033	0.0187644	1.62743	0.230858	0	0.0770299	0.0975292	0.0180792	0.224154	0.0229147	0.784279	0.0192565	5.74645	0.443315
LEFTY2	0	0.0060605	0	0.0251289	0.071772	0.0438221	0.013802	0.0271236	0.0459517	0	0.0189684	0	0	0	0	0.00898966	0.0341566	0	0	0	0	0.0309071	0	0.00756833	0.0253038	0.00940624	0.016742	0.0340268	0	0.0664084	0.126646	0.010852	0.011956	0	0.0118684	0.0148394	0.0148342	0.00978378	0.0347629	0	0	0	0	0.0177205	0	0.693824	0	0.0246448	0.0927697
LEP	0.00574123	0	0	0.00439388	0.0501984	0.0229874	0	0.0189707	0	0	0	0.00424906	0	0.0249144	0	0	0	0.00545087	0.0165851	0	0	0.0144112	0.00450361	0	0	0	0	0	0	0	0.014763	0.0151801	0	0.00669824	0	0.00518945	0.0103753	0.0307932	0	0	0	0.0089877	0	0	0.0190052	0.00516246	0.0106474	0	0.00720939
LEPR	4.50206	30.016	1.28121	0.773161	5.53237	6.62632	9.52978	21.7807	3.52532	9.3327	4.59909	14.6251	8.89101	0.131146	76.441	12.6334	1.35572	19.711	9.67298	26.7409	62.2287	2.8913	14.7833	190.764	2.39019	15.8488	5.15643	1.12925	6.89009	7.68399	0.15098	0.216887	1.76321	12.5661	1.85017	6.15168	9.34992	2.59654	16.4916	23.5222	15.1973	12.6628	22.6896	5.48576	0.272491	7.28119	0.377912	0.36466	3.46097
LGMN	22.6314	15.8873	23.0476	12.3793	37.8758	29.9224	30.4319	27.5061	13.6068	7.0188	11.2762	20.3311	26.346	20.7227	11.0008	35.6825	37.3344	22.1227	44.4791	11.6692	29.6117	31.7031	22.6907	15.0808	12.3413	21.9284	16.9832	23.949	17.1381	15.8075	31.2337	32.4757	11.5378	15.2583	12.0067	19.5004	29.0038	23.3908	30.9344	11.9272	11.2451	7.08731	6.6464	15.5406	32.8517	25.7793	15.3072	31.1258	23.834
LGR4	8.7831	11.9747	2.568	16.1434	6.58553	8.7793	5.00945	30.0401	25.2397	7.67661	4.52292	10.7017	5.00603	10.0697	26.7335	4.63304	4.36435	8.53296	2.12927	16.8862	15.383	7.31912	40.5611	8.19509	2.25782	8.37174	4.93637	21.2756	10.3952	6.4642	6.69741	3.59071	16.2481	20.6244	5.13605	15.0158	8.3	7.17588	9.35142	3.8152	2.9351	13.2745	11.7635	5.92689	3.82399	13.1164	6.76015	7.6586	22.7777
LGR5	0	0.0193253	0.0922367	0.0457881	2.269	0.144727	3.30711	0	0	0.00452792	0	8.36595	0.0621692	11.0789	0	10.3605	0.0414919	0.223661	0.199836	0.00953908	7.15439	1.84437	0.155461	6.23674	3.94213	0	6.13172	7.88578	10.7313	0	0.538451	0.0247171	3.38218	5.3529	0.00540646	0.0168996	4.1626	0.0735377	0.043548	3.60946	3.44672	0.339517	6.00938	0.0282529	3.31734	5.16791	0.0693469	0.0112265	0.117388
LGR6	0.0257059	0.360599	0.121939	0.0918084	0.0599358	0.125796	0.0216111	0.764457	0.0999312	0.0778184	0.0891012	0.031708	0.514444	0.0604242	0.00788455	0.0656875	0.225813	0.207449	0.0990109	2.51377	0.00504753	1.12381	0.124348	0.0434514	0.0264136	0.343657	0.196608	0.297473	0.099963	0.318876	3.07365	0.203903	0.0499215	0.434867	0.185834	0.0735786	0.913605	8.50222	0.272156	0.0500269	1.58917	0.160967	0.0223791	0.499438	0.321466	0.188768	1.45402	0.0257257	7.26826
LHB	0	0.110874	0.0712362	0.0861973	0.131303	0.100213	0	0	0.105083	0.090922	0	0	0.138708	0	0	0.0822304	0	0	0	0.0638492	0	0.047119	0	0	0.23146	0.129062	0	0.0389063	1.12624	0	0	0.148898	0.0546822	0	0	0	0.0678461	0.425099	0.079496	0.0730636	0	0.176317	0.163421	0.0810467	0.0828523	0.0337583	0.0696254	0.300576	0.754298
LHCGR	0	0	0	0	0	0	0	0	0	0.00475617	0	0	0	0	0	0.00430151	0	0	0	0	0	0	0	0	0	0	0	0	0	0	0	0	0	0	0	0	0	0	0	0	0	0	0	0	0	0	0	0.0471698	0
LIF	0.0989418	3.17036	0.42241	0.117369	0.155718	1.76949	0.249543	0.0490399	0.18924	0.473246	0.211486	0.0439359	0.466083	0.279087	0.0182086	0.44426	0.404842	1.26346	0.0357274	1.19472	0.0349703	0.440834	2.67378	1.76975	0.0991242	0.510198	0.0201798	1.63543	0.535912	0.69639	5.96612	0.353169	0.288222	0.0519455	0.0143055	0.0939044	0.813554	2.73593	0.529002	0.144415	0.0734007	1.12295	0.236876	0.517962	10.4153	0.262454	0.706446	2.9854	3.60306
LIFR	0.0314451	0.441109	0.0785075	0.834697	0.0983997	0.541165	0.420195	0.582408	0.0339706	0.00801622	0.453188	1.50536	0.152867	0.0538651	0.397471	2.04629	0.847052	0.652092	0.372912	0.0858471	0.368519	1.05934	1.23982	0.140384	0.158153	0.542391	0.354427	0.497381	2.85476	0.929207	0.153204	0.0656388	1.75488	1.31493	0.129216	0.0747974	1.40271	0.394518	0.841061	0.380061	1.60532	0.0207269	0.0590735	0.201862	4.31163	1.38548	1.17247	0.447197	3.66392
LILRB3	0.194458	0.291021	0.77784	0.261445	0.340049	0.469962	0.229758	0.0955136	0.764943	0.311839	0.170025	0.167256	2.55343	0.171053	0.522292	0.276273	0.364484	0.204583	0.212552	0.187702	0.191948	0.42875	0.234993	0.227747	0.34022	0.240896	0.091113	0.550094	0.166421	0.187081	0.337857	0.889352	0.160753	0.233004	0.121582	0.237526	0.341918	0.275622	0.445144	0.122737	0.146209	0.518333	0.0594808	0.113457	0.649513	0.132323	0.399619	0.98356	0.455373
LRSAM1	3.43669	7.38286	3.45679	8.32083	2.58796	5.78745	3.26741	7.61018	6.12325	4.01988	7.96744	3.62879	1.65365	9.91158	7.24353	4.94107	2.64543	9.01135	2.97574	2.76172	14.6163	6.69573	5.68458	3.65802	6.14281	2.90203	21.4822	5.38418	7.39936	2.18349	6.99796	3.40754	2.92212	3.3273	2.98527	3.67157	4.60107	5.11216	2.07168	4.49968	7.06627	2.0492	3.93962	2.78699	5.46983	7.86312	6.16495	8.06264	5.417
LTA	0.101736	0.0417292	0.557668	0.22493	0.553483	0.226301	0.0950331	0.0186758	0.0210931	0.164256	0.0391816	0.0585622	0.208821	0.0735815	0	0.210452	0.14111	0.257575	0.0163273	0.105735	0.0665885	0.737736	0.141875	0.0625335	0.121959	0.181345	0.0691655	1.00744	0.188391	0.0365801	0.203469	0.672486	0.214038	0.131882	0.114407	0.0204352	1.14397	0.350301	0.62233	0.153993	0.0419297	0.17696	0.0295231	0.146416	0.461507	0.213453	0.146746	0.0452508	1.00782
LTB	1.33032	0.906635	16.9657	3.67111	7.71715	5.27527	3.01109	0.845339	0.286427	1.31659	3.11842	0.208273	5.12774	1.24897	0.341339	1.1347	8.69366	3.95914	0.609703	5.28634	0.889145	83.0324	1.42484	1.12041	1.85326	6.03901	0.443515	16	2.51556	2.0283	49.8644	9.72366	7.11709	9.16319	3.51399	0.716855	13.8235	17.716	18.6214	2.71344	0.806606	5.56687	0.133633	6.06127	3.20401	12.4107	5.00545	1.61298	21.5721
LTB4R	0.369393	0.470778	0.867789	6.49883	1.65334	0.909714	0.835529	1.27871	3.63516	1.60282	0.497927	4.06825	1.38915	2.55718	1.07636	2.81734	0.555053	0.438389	2.40095	1.90337	2.16563	0.833399	0.8072	0.425725	2.47394	2.17187	1.15701	0.332678	1.05536	2.39074	0.520159	3.80213	0.493193	1.08255	2.65136	3.46611	1.27947	1.74538	0.861326	2.01117	1.63933	2.0928	0.639345	0.322771	2.21269	0.351926	0.717679	4.70459	2.21436
LTB4R2	0.0850263	0.0762277	0.0576191	1.26426	0.106204	0.283699	0.153176	0.521767	0.662966	0.205917	0.147358	1.25855	0.280484	0.566644	0.452664	0.73163	0.0589668	0.0807261	0.210532	0.258221	0.372071	0.038112	0.281082	0.212784	0.149772	0.187904	0.346833	0.119583	0.212557	0.314455	0.0937013	0.232843	0.114997	0.106285	0.263433	1.13635	0.449992	0.68406	0.22505	0.4255	0.168957	0.152121	0.111033	0.0393326	0.583029	0.0655328	0.202738	0.461927	0.640617
LTBP1	0.211647	1.27976	0.0305006	9.81301	0.416957	2.89267	0.56308	1.5359	0.487417	0.155717	1.53532	4.89747	0.499863	3.6593	5.07584	3.66456	0.784066	1.06068	1.25763	0.460186	3.96437	1.33488	3.86267	1.13131	0.871275	0.782839	1.47806	1.22438	2.66557	1.00134	2.81071	2.9397	2.57151	1.29715	3.04849	1.53772	3.055	4.1192	1.38702	1.10533	1.24715	0.364879	0.303207	0.65643	5.96558	0.226447	0.56144	0.262753	7.01433
LTBP2	0.410367	1.35702	0.13524	0.371916	1.26904	11.0346	0.875206	3.51839	0.197481	0.175228	0.464154	0.776862	2.26228	1.3403	0.274261	1.43576	0.347505	1.44157	1.06067	0.473844	0.70485	6.50575	2.00259	0.23498	0.685761	1.32657	1.2973	1.27133	1.95816	1.68442	3.39891	3.66055	2.24298	2.01588	0.521506	0.527108	3.93827	5.72778	6.74571	1.1475	0.216308	0.598462	0.406146	1.91632	2.91707	3.30157	2.57955	1.48279	13.0861
LTBP3	8.7755	1.81089	1.6326	2.27195	5.88491	7.11129	1.22438	33.7629	11.6505	2.80316	12.6309	6.9537	2.7076	1.68507	14.9245	2.14563	3.87215	14.6901	1.5844	10.2796	3.95165	9.17664	16.5974	3.7347	4.40043	4.8828	3.48316	16.6077	11.2483	8.93761	10.6218	8.27513	3.91426	14.4014	6.44367	8.26542	11.9411	10.4306	4.55475	5.43663	3.66819	6.08753	11.8488	2.98316	8.24672	15.8353	9.25635	10.6647	22.9349
LTBP4	0.765251	2.00966	0.266512	0.533769	0.457358	8.35167	3.53029	3.46484	0.542261	2.65971	3.04702	1.46967	0.286313	0.0472907	2.05676	1.12449	0.577736	1.95433	4.58216	0.943146	0.741803	4.37062	3.93797	1.07844	0.283672	3.4077	2.25473	1.39033	5.24272	5.02721	5.17473	4.24202	0.324505	0.579198	2.14635	2.33341	5.05031	7.28091	8.97883	0.160239	4.02425	0.966721	0.259317	2.07284	2.63742	0.583585	4.17226	14.2069	23.5705
LTBR	44.754	10.0392	20.408	13.6655	14.9317	26.5937	22.4583	19.5931	22.4121	32.8398	18.6583	12.4446	9.64565	14.3414	12.3768	14.1757	12.5069	21.6431	8.5262	17.1485	18.09	20.1188	17.1265	18.7578	16.1967	14.8864	18.5376	26.2386	29.0448	10.907	22.1092	17.0793	27.861	15.3717	10.3838	24.8923	15.0861	25.009	14.8298	42.4533	11.5742	30.2632	31.4004	10.7082	17.1119	18.5412	24.7013	25.8675	24.4677
LYN	6.68256	4.41581	5.9996	2.54379	7.15027	6.53764	7.52634	3.876	1.90451	1.81829	1.19208	4.49933	2.51589	2.55898	1.86955	6.60917	3.51381	4.96416	1.95795	2.34859	1.30905	5.07208	5.93432	5.53494	2.48076	2.92478	1.91979	7.39898	3.37553	1.97245	2.9714	6.28279	5.26662	3.92973	1.5193	2.66865	5.27806	4.97191	4.18789	5.00435	2.29035	3.96587	2.4404	4.39294	8.99914	2.238	4.78064	7.68215	10.2731
MALT1	1.02066	0.764251	0.391451	1.30327	1.26583	1.55302	1.86829	3.51307	1.49594	0.859008	0.761084	1.54158	0.528204	2.45609	3.02567	2.08294	1.62903	1.12367	0.888714	0.677096	3.21728	3.1298	2.41327	1.82036	1.56198	0.817041	1.84179	3.43197	5.17546	0.916493	2.08007	1.35412	2.16402	2.29924	1.30565	4.52122	1.76273	2.10949	1.00588	1.70458	1.65466	3.16162	1.23675	0.879002	5.07201	2.45226	1.81567	1.75493	3.46776
MAP2K1	9.12016	5.56884	3.53833	22.1508	8.22998	8.5679	6.06891	12.7291	9.7567	11.05	8.0328	10.6737	4.55454	11.9061	6.57522	9.24428	3.98479	8.15803	5.84713	10.8601	5.70474	7.73584	9.77653	8.3847	5.10428	5.08174	10.0996	7.58923	10.342	10.049	7.2665	8.52144	5.56151	9.2997	8.92688	15.8971	9.35465	3.99697	10.6015	7.23786	6.14197	8.11992	7.13495	6.12865	14.882	9.17303	8.67002	9.30494	9.73389
MAP2K2	21.5212	18.1347	41.291	28.7799	30.4864	18.5131	16.4127	17.6759	17.1823	37.5395	35.7623	14.4263	8.97801	17.7543	9.58927	15.2363	11.3909	22.3839	13.5248	40.6381	23.1593	30.7334	18.0263	14.9087	10.057	28.0301	14.7422	22.1978	11.7745	8.98607	37.6163	42.5361	21.6129	24.3124	22.9294	19.9952	13.635	16.6962	10.7872	20.719	25.8792	21.5271	30.6292	26.306	27.7444	27.7951	26.0518	23.4331	17.7104
MAP3K14	3.22776	4.48625	1.26056	9.0183	2.11811	2.31068	2.67975	1.41911	6.11377	2.00301	0.961409	11.5271	1.04751	3.94951	8.78981	11.7437	1.98253	2.37325	3.10647	0.964361	2.7908	1.66759	10.4095	4.52277	1.03429	3.65255	8.85519	2.92077	5.93297	1.85668	2.4589	6.26326	1.66158	1.09999	10.5708	3.62723	4.0686	2.21151	1.50263	1.14271	1.3379	1.46021	2.29301	2.35043	10.5738	1.19172	1.63652	7.28318	4.51664
MAP3K8	0.53436	1.78743	0.341423	1.0057	9.91645	1.33175	4.22652	1.21616	0.656263	0.996999	0.188999	1.99757	0.211529	8.28175	1.14395	3.05142	0.257141	0.776533	0.732441	0.486848	9.45613	4.84516	1.06503	3.09684	1.79849	0.349899	1.87389	2.87053	1.52668	0.494059	2.52377	1.17499	1.20717	2.21382	0.189209	2.02073	2.14813	1.42003	1.29313	4.82826	2.66976	3.41438	7.79928	0.229535	4.27782	3.16732	2.30558	4.47463	2.54024
MAPK1	6.36024	4.95671	2.37948	7.31337	7.69646	5.80935	4.70346	11.647	6.60313	2.0995	2.43352	9.58873	1.87505	7.72887	7.69332	11.7172	4.81932	4.49769	2.12153	4.7898	12.8908	5.48255	10.9009	11.4201	2.25587	2.36985	7.36394	16.1818	11.8874	3.74141	11.7182	7.00242	8.73403	10.4618	2.45677	11.8909	10.9086	5.07137	4.92015	6.63051	4.12795	10.2306	7.23353	3.03809	14.2694	11.3945	4.44897	3.687	12.5195
MAPK3	4.56491	8.47914	13.4343	12.0126	21.6271	8.42095	4.88604	5.01319	13.3763	10.8091	6.20793	9.371	8.32413	7.51284	3.89516	8.45713	14.7342	8.32766	6.97996	6.24358	9.38175	9.53758	12.9591	4.87002	5.69964	5.8135	6.98009	21.1688	13.6192	4.82305	9.59147	15.204	6.90611	6.63701	6.33711	6.03207	7.09863	8.33992	10.9012	9.21718	9.09157	3.29245	8.20916	9.30005	14.7392	11.5587	15.7507	23.8116	11.4444
MC1R	0.074081	0.0494857	0.207501	0.178187	0.296104	0.254241	0.237258	0.174847	0.243556	0.414352	0.16711	0.300244	0.162919	0.210493	0.175286	0.332246	0.0587155	0.110525	0.147764	0.254978	0.610946	0.230228	0.063646	0.0650501	0.576342	0.13744	0.305783	0.197412	0.199893	0.194066	0.761967	0.181883	0.0873481	0.111124	0.397838	0.178563	0.140251	0.170286	0.13072	0.130441	0.124309	0.154629	0.224192	0.213232	0.389254	0.244248	0.150471	3.36446	0.403109
MC2R	0	0	0	0.00804878	0	0	0	0	0	0	0	0.00389175	0	0	0.00483863	0.00575877	0	0	0	0	0	0	0	0	0	0	0	0	0	0	0	0.00695178	0	0	0	0	0	0	0	0	0	0	0	0	0	0	0	0	0
MC3R	0	0	0	0	0	0	0	0.0299261	0	0	0	0	0	0	0	0	0	0	0	0	0	0	0	0	0	0	0	0	0	0	0	0	0	0	0	0	0	0	0	0	0	0	0	0	0	0	0	0	0
MC4R	0	0	0	0	0	0.0157297	0	0	0.0549802	0.0142714	0	0	0	0	0	0.0129071	0	0.0111897	0	0	0	0	0	0	0	0	0	0.0122137	0	0.0190695	0	0.109067	0	0	0	0	0	0.00702365	0	0	0	0	0	0	0	0.0105976	0	0.0117948	0
MCHR1	3.91904	1.61564	0.855604	0.309575	1.87855	1.15938	3.17769	2.35548	0.730054	3.59733	0.727857	0.245387	1.1025	0.597114	0.482042	0.660857	1.42563	0.818459	0.258606	3.46224	0.117188	0.208065	0.0156052	0.727562	0.0817653	2.37839	0.0743862	0.501657	1.33724	0.772518	0.11936	4.39207	1.37151	0.734974	2.60787	2.84111	0.99464	3.78586	0.0842481	2.02611	0.848598	0.934284	0.837086	2.29044	0.102439	1.79478	0.393533	0.0464543	0.832696
MCHR2	0	0	0	0.106798	0	0	0	0	0	0	0	0	0	0	0	0	0.0113855	0	0	0	0	0	0	0	0	0	0	0	0	0	0	0.010852	0.011956	0	0	0	0	0	0	0	0	0	0	0	0	0.00738111	0	0.00821495	0
MDK	8.46737	10.7537	275.505	4.33157	292.057	43.8909	321.17	22.6606	3.29516	89.4311	5.36162	13.8767	156.337	39.6839	2.23786	52.1131	164.645	39.5675	3.5386	60.5212	43.5795	45.1007	388.418	46.1325	37.4985	19.0059	9.04519	305.155	265.499	8.6224	20.1866	35.2253	20.3161	33.6005	77.9542	15.5577	18.3719	160.671	329.554	61.8948	58.2223	54.6312	224.571	30.9027	332.348	156.665	11.4084	128.522	48.0772
MET	18.4606	8.23794	5.52576	4.31022	15.2923	7.87025	25.4773	36.7397	16.8125	5.0295	6.13967	26.0928	11.9087	6.44594	21.358	32.4489	11.6304	9.93938	9.67374	25.6485	16.938	11.8717	22.4744	38.8019	15.7873	9.82585	33.5326	9.65223	18.1121	8.90944	6.60615	7.84381	9.31624	14.134	12.1156	41.1185	19.428	9.0732	15.4959	28.229	8.6707	25.2183	37.0217	17.1832	13.0506	15.3254	19.027	14.2819	14.9604
MIA	0.0150575	0.0222342	0	0.0460953	0	0.0200963	0.0506357	0.0497544	0.0561945	0.0546996	0.278358	0.022288	0.139081	0	0.0277108	0.0164902	0.0835405	0.042888	0.0217488	0.0512165	0.0532197	0.0566946	0.0236232	0.041649	0.0464162	0	0.0460661	0.0624172	0.0250948	0	0	0.258783	0.0219316	0.0175675	0.0653128	0.0136104	0	0.00897347	0.0159419	0.0293039	0	0.188576	0.065544	0.0487586	0.0332299	0.365569	0.0558498	0	0.0189081
MICA	2.18898	3.37204	3.26346	3.38204	10.0446	3.58049	4.60764	5.18005	3.92339	4.55393	2.28193	5.62757	4.71266	4.53535	4.5888	3.78515	5.33042	3.03928	4.57618	3.54785	10.0346	6.52746	5.60965	3.26257	7.61024	5.111	7.60319	1.98704	2.46867	4.0611	12.5271	3.89478	5.22593	2.44825	3.81935	6.13665	5.60657	4.01163	3.81611	3.18702	5.25024	15.5364	7.63707	6.83955	10.0066	7.45887	2.65551	4.80136	5.89019
MICB	2.63157	0.497386	1.0386	2.00325	1.20261	1.31122	2.73744	0.985486	1.02793	1.708	0.154052	2.8565	0.907455	0.220784	1.22042	1.70612	1.29455	0.886126	0.668974	2.72707	0.553931	0.810285	6.29746	2.491	0.237954	0.683516	1.0162	0.836319	3.39165	0.363343	1.22705	1.69775	1.063	2.43162	1.27843	1.93464	2.30808	1.89447	1.18132	1.35204	0.637734	0.197742	0.995818	1.08317	8.50219	2.51772	0.195215	1.58718	1.37468
MIF	92.5624	33.7516	48.3428	1.59891	90.5608	39.4384	29.1444	22.2311	41.9413	32.2232	31.5029	20.4153	3.10718	40.6445	17.7742	36.2589	13.04	37.9899	15.8041	45.7387	29.0568	38.4648	56.3734	22.1355	16.5916	39.5622	54.4911	75.8693	75.7452	14.0944	74.7097	66.1705	28.9082	36.1901	16.3834	33.9435	39.9949	51.5115	45.0817	80.6971	61.2733	60.8384	81.7084	20.3911	64.2357	143.649	33.9514	79.2562	31.8818
MLN	0	0	0	0	0.606638	0	0	0	0.0647328	0	0	0	0	0.0376358	0	0	0	0	0	0	0.163483	0	0.0272126	0	0.588157	0	0	0.0719011	0	0	0.0892039	0.0458621	0	0	0	0	0	0	0	0	12.8678	0	0.0302012	0	0	0	0	0	0
MLNR	0	0.0234007	0	0.0121284	0	0.253808	0.0266461	0.0261823	0	0	0	0	0	0	0.0145823	0	0.0219808	0	0	0	0	0	0.0124313	0.043834	0	0	0	0.328459	0	0	0.0407501	0.0209507	0	0.147913	0	0.0143244	0.0286388	0	0.0335564	0	0.264522	0	0	0	0	0.113999	0	0.0158597	0.0199
MPL	0.0645888	0.0476866	0	0.275402	0.0161352	0.0615734	0.0155143	0.0304886	0.120522	0.011173	0.0319824	0.0614596	0.0170452	0.670688	0.195278	0.242518	0.012798	0.00876032	0.0133273	0.0392307	0.119578	0.0115805	0.0289518	0.229696	0.028443	0.0211464	0.0658665	0.0382481	0.445951	0.0447882	0	0.0487931	0.0134393	0.010765	0.120068	0.225185	0.0333491	0.0164963	0.0293067	0.0359138	0.136902	0.0144445	0	0.0298784	0.0712693	0.0746713	0.0684475	0.0554046	0.0579326
MR1	1.26237	2.20366	0.761232	4.52195	1.28557	2.00159	1.59987	0.478894	1.93424	0.958878	0.674663	2.6909	1.75774	2.91453	0.322771	2.89839	0.349605	1.59936	1.66862	1.05202	1.84855	0.619508	1.4796	2.30069	0.857915	1.02053	1.34946	1.38657	1.03968	1.46138	0.59412	2.46584	2.82684	2.42852	1.84646	1.23028	2.0042	2.71756	1.51886	1.38983	0.93494	0.532686	0.504697	0.968092	4.83241	0.113322	2.81636	3.23719	3.33127
MSTN	0	0.0154111	0	0.0372748	0.0121672	0.0371448	0.0350969	0.17243	0.0129833	0.0168505	0.00803904	0.0823914	0	0.00754849	0	0	0	0.00660594	0.0602986	0.0295829	0.0983678	0.0174651	0.0218318	0.0128302	0.0107241	0.00797297	0.0496683	0.00721049	0.0579794	0.0337737	0.0178913	0	0.0506711	0.0243529	0.01006	0.0251565	0.0125739	0.0414649	0.014733	0	0	0.0326768	0.00605736	0.00751018	0	0.075077	0.0129036	0	0.139794
MTNR1A	0	0	0	0	0	0	0	0	0	0	0	0	0	0.0165259	0.0280333	0.0166821	0	0	0	0	0	0	0.13144	0.0280891	0	0	0	0.0157859	0	0.0246468	0	0	0	0	0	0	0	0.0272337	0.0161274	0	0	0	0	0	0	0	0	0.060978	0.0191281
MTNR1B	0	0	0.0380946	3.92578	0	0	0	0	0.0187315	0	0	0	0	0	0	0	0	0.0190613	0	0	0	0	0	0	0	0	0	1.31076	0	0	0.0258126	0	0.2778	0.339638	0	0.0362943	0	0	0	0	0	0.0314294	0	0	11.4532	0.00902639	0	0	0
NAMPT	23.0026	45.3661	1.56042	3.10871	1.99207	16.507	71.2754	18.9212	8.28816	17.6173	4.8812	7.37751	5.29914	3.22741	54.9311	8.75671	3.35575	15.5106	10.2046	4.63127	4.29475	2.5354	33.6063	19.1778	2.10362	14.0757	4.96768	5.88696	6.27422	17.0136	4.09539	7.39238	3.5144	3.2657	9.22048	34.4309	8.90126	10.2027	13.345	7.17879	2.74457	4.66725	2.61442	19.1631	23.5669	2.88765	15.1226	54.7746	28.0811
NCK1	3.79318	3.2323	0.909671	6.72126	4.0628	3.61409	4.18107	5.97966	5.5199	2.6666	2.59914	9.59558	1.236	4.01803	6.22447	5.15801	2.4114	3.95148	2.61765	2.68794	6.34337	3.5573	6.18243	4.23077	1.36417	1.99219	4.63649	5.09929	6.69925	2.90676	2.45199	4.26945	2.78545	4.02595	3.22208	5.89534	4.48423	3.17731	4.64625	3.52697	3.71292	2.65565	3.87559	2.30305	12.4403	2.90392	3.73227	5.48327	6.15907
NCK2	1.09667	1.39634	0.834845	15.0572	1.34357	3.88264	3.13582	5.76106	0.92516	4.53257	2.13204	4.47618	2.30493	0.170985	2.61041	1.17944	3.44299	1.61481	4.12602	4.22161	1.14504	13.5826	38.3719	3.09999	0.809722	1.39965	3.52251	15.7136	9.72952	2.90072	27.2204	8.77709	6.91536	8.33575	1.12038	1.7095	4.16545	3.91743	6.38247	0.549541	1.76599	14.5157	0.868986	1.23335	17.6515	6.33595	3.0203	7.49203	21.9926
NCR1	0.0311173	0	0.137768	0.0793823	0.163244	0.0276869	0.0872015	0.0342735	0.0387098	0.0628001	0.0599212	0.00767659	0.172451	0.0225059	0.0763547	0.193109	0	0.0196957	0.0149817	0.0352806	0.0244404	0.0781085	0.0732283	0.0382534	0.015987	0.0594288	0.0423104	0.0967418	0.0172866	0.0167828	0	0.123413	0.045323	0.0363043	0.059988	0.0281267	0.0749783	0.0432699	0.0549081	0.0201861	0	0.0324754	0.00903004	0.0223917	0.0114453	0.0279804	0.0384723	0.0415217	0.0260498
NCR2	0	0	0	0	0	0	0	0	0	0	0	0	0	0	0	0	0	0	0	0	0	0.0202159	0	0.0148511	0	0.0184575	0	0	0	0	0	0	0.0234609	0.0187924	0	0	0.174652	0	0.0170535	0	0	0	0	0	0	0	0	0.0161199	0
NCR3	0.226807	0.143532	1.07589	0.52074	1.38816	0.281084	0.326876	0.107062	0.045345	0.156938	0.224615	0.0359698	0.508769	0.0703031	0.134164	0.301613	0.539291	0.446054	0.140398	0.220417	0.133605	1.89094	0.432079	0.0298737	0.124849	0.63118	0.115647	0.990539	0.269997	0.524254	0.124974	0.663941	0.25956	0.604831	0.562164	0.234296	0.907581	0.52135	1.42362	0.0315283	0.150231	0.228252	0.0705192	0.262299	0.0893807	0.378751	0.480714	0.291834	1.70884
NDP	0	0.00790874	0	0	0	0.0428898	0	0	0	0	0	0	0	0	0	0	0.0148577	0	0	0.0364355	0	0	0	0	0	0.0122748	0.0109238	0.0333028	0	0	0.440715	0.0141615	0	0	0	0	0.0193582	0.025535	0.0680465	0	0	0	0	0	0.0945592	0.00963209	0.0198658	0.0214404	0.0269025
NENF	23.2683	39.5893	49.2637	46.7033	64.1181	24.0033	21.28	71.2327	103.546	77.7994	63.1085	62.015	254.185	39.5981	17.2177	39.5415	163.279	45.9222	55.9993	68.1637	45.4809	190.762	19.3093	20.909	170.73	76.9536	38.4258	30.5142	109.323	39.1182	172.178	146.641	59.5349	49.4367	52.9919	38.4789	39.2863	88.3515	50.3597	62.3417	107.479	95.8398	55.9076	121.214	88.1335	70.1188	59.2115	162.398	38.4194
NFAT5	0.379507	0.0724792	0.106765	0.610208	0.234474	0.514494	0.464993	1.26587	0.263604	0.101477	0.0567119	2.26469	0.0884635	1.35077	0.620204	1.22325	0.0996313	0.167085	0.0864595	0.361398	0.837809	0.049584	0.683672	1.58285	0.110713	0.027437	0.598224	0.975156	1.32483	0.143343	0.200098	0.109207	0.531835	0.413436	0.0865475	0.808347	1.36733	0.183358	0.245894	0.335502	0.113238	0.0937076	0.302251	0.13956	0.871866	0.794454	0.510654	0.524771	1.39058
NFATC1	0.168894	0.235004	0.912103	0.313202	0.348355	0.90165	0.320388	0.590271	0.0828292	0.178295	0.152609	0.166664	0.340002	0.0610772	0.213191	0.526436	0.20723	0.21997	0.394069	0.217269	0.426024	0.475581	0.305737	0.301458	0.350425	0.339928	0.194316	0.666449	1.29913	0.620121	0.762797	0.666983	0.154537	0.18189	0.225411	0.0743738	0.927392	1.14975	1.36403	0.101135	0.261032	0.396597	0.139496	0.476789	0.353612	0.188861	0.485896	1.3652	3.14591
NFATC2	0.239336	0.281676	1.03415	1.70474	1.02352	1.17966	0.34664	2.99108	2.04728	0.218077	0.626977	1.78184	0.945548	3.47833	1.32137	1.08476	1.09121	0.407217	0.544208	0.727427	3.29432	2.99787	1.19152	1.39829	0.887521	0.467047	0.55822	4.3638	1.40989	0.663308	4.16175	1.30009	2.05362	2.59049	0.702366	1.72853	3.46013	1.09868	1.25944	0.475001	0.246113	1.93271	0.97579	0.386224	2.83963	2.67839	2.15338	0.68536	3.92486
NFATC3	1.27095	0.671663	1.21001	1.76277	3.36885	1.71411	1.71333	2.65605	0.892462	1.42019	0.66724	2.39776	0.378952	2.05616	0.976618	6.04123	0.612352	0.664726	0.779381	1.46375	5.16194	0.856329	1.8855	5.73776	0.714829	0.549335	2.58763	1.91095	2.55665	0.909151	0.888696	1.21448	1.27633	1.60507	1.63772	2.46488	2.40962	0.684332	0.85929	1.81385	1.55489	0.987831	4.50543	0.750902	1.97074	1.7403	1.07514	1.45491	1.69395
NFATC4	0.0884354	0.254298	0.0706536	1.40528	0.276737	1.4381	0.340436	0.265302	0.258387	0.166266	0.1936	1.38652	0.524501	0.600906	0.0685265	0.101947	0.487421	0.258517	0.53783	5.25812	0.257732	1.90732	6.29639	0.300401	0.731744	0.362684	0.17325	0.600528	0.403373	0.271118	1.4482	1.76294	0.338969	0.168341	0.265824	0.357609	0.428981	2.66149	0.842665	1.04623	2.8746	0.71043	0.261362	0.32656	0.464801	0.366212	0.3237	16.0331	1.48749
NFKB1	5.55441	2.67368	1.0182	4.17165	3.56143	5.13475	5.08118	4.2358	6.4295	2.54595	1.97965	3.89945	1.35072	8.17416	4.95216	7.66722	1.38848	3.29817	2.78755	3.55439	5.73052	4.00546	8.44089	5.45968	1.43651	3.41613	4.38742	7.05368	2.63588	3.97567	3.0179	4.95761	2.71042	3.90281	3.97006	3.2024	5.31373	4.05631	5.163	3.45052	3.62588	1.60641	3.45866	3.42107	9.25224	4.30033	3.81775	3.6053	12.4522
NFKBIA	48.8765	27.3745	18.1023	154.121	59.932	33.1739	40.1099	49.4185	120.771	38.7752	38.2978	37.2205	21.3996	76.3384	84.939	54.2611	24.7782	33.6074	71.8871	27.117	52.0757	90.4624	72.5007	37.4962	55.9228	82.8309	42.5023	19.9536	61.062	52.1865	24.1277	35.2997	35.0826	36.7802	40.1972	42.7431	30.9228	31.6525	47.5948	19.9837	37.4441	63.8852	46.4337	35.8766	25.2906	17.2464	31.0893	24.4033	68.3057
NFKBIB	14.6164	15.8067	11.1898	13.611	9.48517	21.0976	11.4357	11.8788	18.1933	37.3829	22.8912	11.1302	16.2476	10.0918	13.5117	12.2506	49.1599	10.2114	11.3979	13.248	11.228	17.422	19.0011	10.9836	12.4101	35.9279	16.5081	21.6701	24.8243	15.0783	17.7278	27.9126	9.93082	15.2096	30.4538	11.6614	8.29068	12.6329	6.14522	12.6607	13.6481	10.2504	13.247	27.2308	20.2395	20.2234	18.3637	17.9675	12.0628
NFKBIE	7.52383	5.2123	18.2024	4.95468	8.28793	4.90404	2.48152	1.39513	16.3817	6.51287	3.79714	2.65187	9.27535	5.10881	2.84907	3.19924	8.19876	4.00864	2.74704	5.45339	3.1997	21.6452	13.7493	4.88884	2.79066	8.75232	3.27388	18.0696	5.48986	3.1142	16.6472	9.84612	5.82835	8.80462	10.5594	8.15538	5.96662	6.41514	8.22347	5.74442	2.73719	5.54974	9.64966	10.642	27.6679	6.09498	5.51643	14.4198	10.8426
NFYA	3.69412	3.08497	3.69535	7.61803	5.8923	2.84679	2.91075	4.14543	6.95089	2.05881	1.5894	10.6538	2.49366	5.24861	3.68365	3.47009	3.45877	2.36265	2.49298	4.84993	4.09726	2.95512	5.41568	5.72888	2.47761	1.99552	4.51328	15.7082	7.91686	3.11779	9.81701	4.25026	8.36726	13.9576	2.61471	8.4525	6.15444	3.53099	5.62935	7.23937	2.42709	7.20257	4.09069	2.7083	10.0512	13.8058	4.19464	7.57441	8.65002
NFYB	2.12752	9.83413	1.42832	5.33043	5.70184	3.20961	3.79041	13.281	5.74422	7.6855	3.85884	7.30401	3.19834	6.33984	5.48658	4.6252	1.68703	5.61967	2.72388	5.54531	7.63626	7.09065	8.00885	4.60622	3.15091	4.98481	6.26641	4.75444	10.4391	4.35264	5.21601	3.52496	2.93143	10.3539	5.21845	5.20334	2.89968	4.49073	11.4218	4.84207	7.42867	11.5298	4.79773	5.7389	8.55531	4.94827	3.04185	5.84033	6.32821
NFYC	5.92156	6.81116	4.94257	13.6328	11.996	6.97464	4.74978	4.75799	9.67897	9.49007	5.97811	7.56285	7.27478	3.45786	5.64533	9.42628	10.1702	5.88015	3.30436	6.26809	5.98145	6.35168	11.8157	3.96796	5.82026	5.70651	4.91346	5.60342	18.4542	3.84819	7.5135	12.2346	6.00914	7.31258	8.8892	7.01669	4.11089	3.20111	6.60509	7.24194	10.5983	9.23456	5.25098	6.40212	12.3147	19.0639	7.61527	6.94297	8.97177
NGF	0.225043	0.456917	0.0355841	0.272698	0.459121	0.500585	0.756779	0.526722	0.384935	0.18167	0.801708	0.458022	0.381084	0	0.0517692	0.10269	0.0520233	1.10392	1.7065	0.127576	0.19885	0.682573	1.38283	0.432269	0.462477	0.945547	0.650235	0.291519	1.00015	0.212405	2.55581	0.520647	0.27315	0.175037	0.352494	0.27122	0.982828	0.905266	1.74724	0.364969	1.59993	0.146791	0.816326	0.647755	0.372479	0.286672	0.62603	0.319057	0.68293
NGFR	0.350118	0.747542	0.0807973	0.238985	0.223389	11.7894	1.0501	1.88386	0.295759	0.504168	1.6181	0.252118	1.41593	0	0.182851	0.0829041	0.301873	2.35383	1.68796	0.132768	1.27091	10.1898	0.84249	0.741587	1.10115	1.28492	0.511441	0.701148	0.985651	3.08511	6.32638	0.669277	0.316999	0.3588	0.704602	0.363512	2.35132	5.48697	8.20508	0.16574	2.80797	0.170355	1.01739	2.11937	0.360228	0.0680698	2.5797	0.298304	33.7106
NMB	3.47743	0.992926	16.04	2.14672	11.0197	3.20519	1.90592	4.66601	2.61706	2.34969	1.19868	1.57831	5.53667	10.8177	0.901604	1.87259	9.85975	3.24684	3.49649	3.57784	2.0145	4.62965	1.58243	1.18682	2.93158	4.64525	1.37147	2.21001	4.35461	0.994749	13.5857	8.20393	6.07235	6.47789	1.91669	7.10265	3.33309	1.00756	1.60692	5.27194	2.20918	1.89481	6.28894	4.72815	7.88621	20.9725	3.38487	144.011	5.21108
NMBR	0	0.00919842	0	0.00953494	0	0	0	0.0205837	0	0	0	0.00922068	0	0	0	0	0	0	0	0	0	0	0	0	0	0	0.0127052	0	0.0207637	0	0	0	0.0181464	0	0	0	0	0	0.0131905	0	0	0	0	0	0	0.0448112	0	0	0.0156447
NOV	0.205679	0.840625	0.0278762	0.708347	3.27557	1.29411	0.345831	0.546126	0.356382	0.0533695	0.135794	0.21746	0.379956	0.0478156	0.466387	0.514855	0.101886	0.223174	0.307689	0.049971	0.718303	0.857396	0.570457	2.8784	0.747244	0.277774	0.936374	0.159861	0.636598	0.998377	0.28333	0.466136	0.213983	0.188543	0.41421	0.318706	0.876136	1.60659	0.894368	0.128661	0.313343	0.0344983	0.14069	0.650163	3.09628	0.19155	0.408688	7.95416	4.5475
NPFF	0	0	0	0	0	0	0	0	0	0	0	0	0	0	0	0	0	0	0	0	0	0	0	0	0	0	0	0	0	0	0	0	0	0	0	0	0	0	0	0	0	0	0	0	0	0	0	0	0
NPPA	0.0175312	0.103548	0.133059	0.0402511	0.183941	0.0233979	0.0589545	0.115857	0.997753	0.0212287	0.202555	0	0.0323859	0	0.112921	0.0383987	0	0.0665785	0.101287	0.0596306	0.0826172	0.198026	0.0412563	0.0161638	0.162125	0.020089	0.661488	0.127175	0	0.113464	0.180319	0.092707	0.0255346	0.0409071	0.0760428	0.618008	0.0950451	0.031343	0.0185609	0	0.0650284	0.247001	0.0763119	0.018923	0.116067	0.0945837	0	0.192993	0
NPPB	0.0282925	0.125332	0	0	0	0.0755206	0.0475713	0.0467433	0	0	0.032689	0	0	0.0306943	0	0.0309845	0.0392424	0.0805849	0	0	0.0666652	0	0	0	0	0.0324204	0	0.791638	0.188609	0	1.30952	0.897681	0	0.0660172	0	0.102294	0	0.0168608	0.239634	0.550609	0.0524725	0	0	0	0.156094	0.0508807	0	0	0
NPPC	0.0183333	0.0135357	0	0.0140309	0	0.0489368	0	0.090868	0.0171049	0.199799	0	0	0.101603	0	0.0168697	0.0401555	0.0254288	0.0348123	0.185362	0.0155897	0.0215993	0	0	0.0169033	0.0282571	0.147057	0	0.0189991	0	0	0	0	0	0	0.185551	0.0165714	0	0.0655541	0.0582303	0	0.408021	0	0	0.336408	0.0809183	0.0164852	0.0340001	0	0.322302
NPR1	0.99686	1.07501	0.16383	1.2465	0.919645	2.29948	2.21724	2.80112	0.71769	0.556027	1.60068	1.34774	1.31952	0.19586	1.59982	1.68914	2.4986	1.42339	4.04177	1.09798	2.86213	2.8766	1.8287	2.45697	2.14741	1.92932	1.83305	1.31776	2.40701	2.36861	0.88808	1.79521	1.84066	1.50644	1.52643	1.07133	1.85113	1.12734	3.50695	3.63562	2.07446	0.147454	1.7357	0.923492	0.493686	0.501119	1.80506	0.569513	2.95696
NPR3	1.72548	1.81907	0.404059	0.423426	0.288857	0.865907	0.163968	0.434022	0.0798433	0.0144594	0.170158	0.291637	0.0257354	0.971603	0.223417	0.165644	0.0579686	0.0604645	0.244338	0.675241	0.0961328	0.0699382	0.210756	0.730303	0.226991	0.107185	0.890967	0.0144371	1.78112	0.299472	0.133055	0.118397	0.0811642	0.0626916	0.886267	1.27002	0.208599	0.333275	0.440375	0.859834	0.166097	0.00934663	0.0294543	0.549928	0.52924	0.112741	0.527794	3.21859	0.747231
NPY	0	0	0	0.130528	0	0	0	0	0	0	0	0	0	0	0	0	0	0	0	0	0	0	0	0.0196563	0	0	0	0	0	0	0	0	0	0	0	0.520298	0	0	0	0	0	0	0	0	0	0	0	0	0.026771
NR0B1	0	0.00658044	0	0	0	0	0.0149862	0	1.2224	0	0	0.316625	0	0	0	0	0.074174	0	0	0	0.0105006	0.0111862	5.55128	0.402664	0	0	0	0.0092365	0	0	0.206266	0	0.0129817	0.0103985	0	0	0	0.0106232	0.0566179	0.0520367	0	0.15348	0	0.0865835	5.30091	0	0	7.35877	0
NR0B2	30.5056	22.1589	29.2638	27.1943	27.5933	42.7315	4.65516	118.366	176.443	152.92	154.78	2.94156	34.17	49.0717	4.95448	14.0999	6.52585	115.996	21.4421	140.491	59.3129	33.5327	48.1923	8.08078	30.2372	118.377	13.8224	32.9335	9.34151	20.0348	46.5585	18.0089	70.9527	34.9763	12.3037	88.3251	14.4881	103.784	46.8094	10.5117	40.1016	67.3257	6.99429	33.2023	52.328	29.0646	76.4507	11.8139	13.4158
NR1D1	5.91458	9.65925	1.801	16.1492	25.888	5.74785	4.19232	26.5066	23.6989	2.61606	11.0321	11.6537	15.6238	26.8348	63.3664	12.1945	4.46044	37.2907	5.01321	4.25847	18.6515	10.4103	32.955	22.5444	11.4416	7.72718	16.0433	7.03959	9.47945	2.31511	10.8556	6.55504	6.55131	4.80968	5.86835	6.51782	26.3054	5.99	6.05948	14.5157	17.3409	13.5615	25.5668	8.65487	9.21503	5.10179	8.28906	14.766	5.51472
NR1D2	4.93911	3.56938	1.64518	10.0542	3.51027	3.43555	3.4773	7.53029	5.30066	1.85061	4.18641	4.85891	5.44707	7.10794	12.8925	8.55327	3.76225	4.72135	2.84579	4.82823	7.28167	9.57783	6.04185	10.4608	4.25871	2.76028	5.0781	3.40882	6.78087	1.58849	4.16407	2.17654	4.13257	2.52303	4.09743	9.29784	8.41361	2.40261	3.08966	6.38841	5.36227	8.35523	4.73459	3.75806	8.81154	3.19743	4.5674	2.5795	5.56669
NR1H2	13.9846	13.0134	9.25209	20.933	18.9473	11.9751	11.8669	15.576	20.1157	25.512	34.0564	24.6185	11.1049	17.7657	14.6253	17.0915	27.7494	16.4018	14.6903	18.6051	22.4733	18.8452	22.3381	12.1268	13.7326	18.1233	21.2452	26.5994	30.9013	25.0315	21.4038	33.6561	11.1332	17.9516	20.8173	17.6155	18.3894	15.5894	15.8473	18.2356	29.517	14.9226	29.7013	29.2804	26.088	29.4401	25.9546	33.7241	15.7147
NR1H3	8.38591	10.6111	22.9555	16.7675	11.8997	10.1458	11.8351	21.4906	24.7007	14.3297	12.2064	11.544	18.2602	13.5997	10.4068	12.0443	18.078	8.64859	15.516	13.1679	14.6615	21.3107	31.0052	9.81252	14.641	14.8311	12.2711	14.1489	15.1454	11.1436	10.6481	12.2145	16.599	26.3596	13.8158	13.7661	8.6106	12.3209	12.2124	5.70697	17.3684	28.1544	24.3492	16.6726	4.14868	13.2622	10.4752	8.50943	11.3626
NR1H4	17.6147	22.7967	5.68539	11.1313	12.0473	13.3603	27.8142	16.0418	20.3525	18.2925	11.7824	23.7087	15.5363	26.4796	19.2528	16.8856	14.7269	20.7432	12.3688	11.0796	23.8081	35.9891	9.0945	13.7764	13.5311	12.6805	17.8764	28.599	33.8774	15.7931	34.0584	17.5704	20.7052	21.7162	30.0385	23.1544	17.0239	19.1923	15.8195	14.5008	22.881	16.6038	12.687	11.7423	42.0544	20.7173	18.2281	16.5493	24.8557
NR1I2	6.87462	7.21468	0.117703	14.8009	0.861424	3.20448	3.47876	0.0361716	13.1072	7.30825	5.33742	17.0703	3.78159	5.9935	28.4056	3.08103	1.14889	2.37312	8.41168	3.21458	0.00429898	0.224404	9.44578	7.27031	3.8469	6.46015	5.76403	0.453775	2.77308	13.1602	0.140743	10.9119	4.40063	5.77276	7.28066	12.662	8.3219	6.48242	1.44486	9.50158	6.40205	4.32422	2.50325	1.49668	1.52197	0.0557788	5.58967	1.35481	0.655236
NR1I3	17.4665	30.0988	4.90366	6.32456	8.65406	5.58208	20.0584	33.0681	20.8969	44.6458	15.6778	16.0883	38.3355	13.2516	29.8372	25.5567	8.13318	8.44388	46.887	3.09177	7.74127	4.526	0.582539	29.1956	27.3973	40.4382	27.9904	4.67912	5.83183	18.0141	2.52065	1.70435	25.3885	7.95021	29.1366	30.9206	9.09365	4.36546	18.4358	40.8599	1.91721	9.27254	6.07724	23.9255	0.393329	9.73863	4.05458	0.237823	3.34965
NR2C1	1.77133	1.84734	1.21545	4.00937	2.35601	1.25228	1.54226	0.849628	2.12683	1.53676	1.97709	2.81777	3.80556	2.54487	3.14361	2.64468	2.25249	1.7931	0.786222	2.92554	2.34907	1.62678	2.45107	2.8005	2.65598	1.20614	2.02718	3.77415	3.36809	1.63983	3.71962	2.22247	2.03683	2.93674	2.22192	4.34388	2.35325	1.30653	1.28633	1.61534	1.18244	10.2538	1.67823	1.15236	3.29186	3.23691	1.74569	2.31745	2.62838
NR2C2	0.747462	0.723548	0.283655	3.78315	0.578023	1.04415	0.83786	1.04556	1.153	0.458587	0.318577	2.57174	0.131944	1.56957	1.96555	2.32659	0.389356	0.528302	0.338281	1.28392	1.28961	0.473227	2.66456	2.64024	0.230412	0.205564	1.28735	2.08627	2.18416	0.593953	0.965282	0.366718	1.44675	1.06779	0.955836	2.40823	1.52188	0.977014	0.696399	1.49345	0.579155	2.51967	0.399112	0.288655	2.99301	1.76392	0.994987	1.62408	2.2902
NR2E1	0.0315591	0.0155336	0	0.0161019	0.0183958	0.00701999	0.132659	0	0	0	0	0.00389279	0	0	0	0	0.0145911	0.059926	0	0.00447269	0	0	0	0.0145487	0	0	0.00536389	0.0109017	0.0350641	0	0.0405754	0.0486755	0	0.0429563	0.114074	0.028526	0	0.0188075	0.00556877	0	0.00975513	0	0.0549495	0.0113548	0.0174116	0.00945921	0.0682825	0.0105278	0
NR2E3	0.0121054	0.00893756	0.0114848	0.324259	0	0	0.0305313	0.0199999	0.0169415	0.0146585	0.0839192	0.0134388	0.0782694	0.0131331	0.0612644	0.0132572	0.00839526	0.0114932	0.0961667	0.00514691	0.0285238	0.0227897	0.0569754	0.00558059	0.0373161	0.0416148	0	0.012545	0.0201748	0	0.0311279	0.104024	0.114607	0.00706165	0.0787619	0.027355	0	0.0288567	0.032041	0.0824555	0.0224512	0.028426	0.0158081	0.00653321	0.100181	0	0.0112251	0.0363443	0.0152011
NR2F1	0.271085	0.707409	8.03485	5.20457	7.61745	2.52637	1.46172	0.741306	0.287808	4.14851	1.90626	4.73554	0.336734	10.0196	1.04508	9.89426	0.991868	1.18481	1.55945	14.7531	19.4214	3.84812	28.9642	0.969596	0.540289	1.02831	5.27634	11.9104	5.35137	2.50317	1.33404	1.63125	7.37945	7.50876	8.36609	6.02019	1.00513	1.33699	2.89481	4.62986	3.33733	0.0658514	4.21955	1.01907	8.05573	29.9023	3.29382	9.41112	7.00185
NR2F2	4.73623	2.63046	1.18247	6.26768	6.75126	6.69037	3.40419	11.4562	8.63641	2.03564	1.81236	5.92836	2.65626	6.81369	5.55254	5.01376	3.10333	4.0147	3.22288	8.79937	5.08929	8.93169	7.82636	5.42066	2.4177	3.06894	5.71035	4.13954	6.44947	2.10028	6.16754	3.40801	3.10827	9.01211	3.88985	8.6143	7.15273	3.70662	6.37582	3.87506	7.02496	6.51498	1.86844	3.11393	4.90074	5.40138	4.90482	6.02069	11.5092
NR2F6	37.0541	27.975	43.5913	54.2232	49.8227	21.2603	22.4661	23.9299	72.7847	52.2346	78.9268	19.6472	23.6529	58.1582	17.2977	22.5881	29.8905	30.1086	41.4067	52.835	34.7425	53.1634	34.3157	17.8328	35.8953	45.5628	47.3049	60.0327	20.1526	24.9908	56.5081	55.8445	74.7031	58.3828	54.5189	39.5813	24.2921	43.4692	21.4019	64.6438	69.4978	55.2502	42.5622	37.0257	93.003	130.464	43.3948	46.8784	30.2858
NR3C1	5.49531	6.03292	1.81977	6.70582	3.68364	4.23142	6.20912	9.13919	7.02856	3.52805	2.86421	10.6358	3.96654	7.11378	13.0955	12.0739	3.11774	3.86376	4.82053	2.8307	8.00519	5.09684	9.13024	10.1511	3.83076	5.58078	8.46825	2.9151	7.56011	2.60476	2.59273	2.42542	3.99111	5.86187	8.51803	7.91807	8.84379	2.42652	4.44685	3.06215	8.4449	4.23937	4.59775	5.6381	4.11964	4.99909	3.23169	4.75186	7.17479
NR3C2	0.472524	0.649467	0.208641	1.70126	0.353387	0.555288	0.449721	0.834687	4.44745	1.2991	0.971724	0.736817	0.0713697	0.641603	0.762951	2.57766	0.251444	0.431697	1.06454	1.92818	1.70161	0.443854	3.21941	0.284964	0.902359	0.987577	1.54562	0.0954728	0.198115	1.15404	0.741255	0.0746483	0.324642	0.377928	0.953901	1.23835	0.531688	0.0920952	0.478252	0.248695	0.242515	0.75833	0.0750298	0.891759	0.898509	0.515746	0.661373	0.514526	1.34345
NR4A1	1.06048	11.2993	0.0612856	0.424342	0.315352	9.45846	0.773883	15.6574	0.439465	0.283553	1.03557	8.51788	0.0596665	0.808857	4.11378	4.30949	0.082132	2.11591	4.15979	0.652299	5.09588	1.64513	4.78644	4.52648	0.481227	2.8221	2.57464	0.423975	1.30087	1.15843	1.25272	2.18481	0.399873	0.301462	0.533151	0.406293	2.70443	0.75229	5.15502	0.670482	4.38788	0.261241	3.21257	1.07494	3.19865	0.425961	0.883522	0.554891	3.84291
NR4A2	0.47516	2.94904	1.05186	0.734876	0.380835	2.41116	0.441081	48.5658	0.350964	0.677262	0.777746	1.93415	0.128009	0.161093	1.02019	2.20616	0.102978	0.756581	1.90166	3.1356	5.32399	1.08711	2.03061	1.0633	0.297522	1.87734	1.7111	0.620648	1.07236	0.416443	0.700004	0.745956	0.223484	0.103943	0.178909	0.335542	0.778186	0.268421	2.32145	0.11559	0.872072	0.960803	0.922129	0.635758	1.17423	0.391655	0.394708	0.757871	1.16226
NR4A3	0.189695	1.03089	0.0649069	0.0713988	0.0543803	1.0625	0.125491	0.780941	0.0580279	0.192046	0.0431159	0.543158	0.2183	0.0337375	1.4565	0.34397	0.0992061	0.174196	0.988169	0.0528874	0.710765	0.323945	0.709864	0.117555	0.17255	0.506012	0.336155	0.138575	0.342059	0.241519	0.207907	0.24667	0.031706	0.0399094	0.053955	0.0421633	0.550742	0.0389182	1.76802	0.00605199	0.449864	0.170388	0.249071	0.110769	0.56275	0.0615178	0.0749735	0.0871404	3.43639
NR5A1	0.0114757	0.0211816	0	0.180044	0	0.015316	0.0192954	0.0284394	0	0.0277921	0.0066295	0.00424658	0	0.00622497	0.0105596	0.0125677	0.0318343	0	0	0.0146375	0.0135201	0.00720141	0.00900195	0	0.0176875	0.00657502	0	0.112978	0.0573763	0	0.118035	0.128955	0	0.0133887	0.0248883	0.00518642	0	0.0205168	0.0121497	0.0223333	0.0532085	0	0.00999057	0.00619337	0	0.0567539	0.0106412	0.0172269	0
NR5A2	2.07026	3.5	2.39538	7.04934	3.54304	4.32312	4.5117	23.5306	8.74649	7.32565	3.01922	13.2534	6.37728	6.16032	2.80847	18.7638	1.97438	3.89905	0.814158	10.1209	0.517191	9.95314	24.6674	5.70957	5.00453	3.09561	7.35878	6.7082	6.00878	6.94741	11.582	3.71564	10.1282	8.4098	3.08343	6.01068	7.71727	3.95052	5.93202	0.0454968	1.373	10.1823	5.47483	6.29727	8.0226	11.4193	6.2336	3.08569	10.3204
NR6A1	0.890245	0.443611	3.09077	1.57569	0.689221	0.573846	0.574649	1.79867	1.55319	1.17145	0.369398	1.88685	0.560071	0.565139	1.77783	1.62089	1.24244	0.489339	0.250801	0.949201	1.94505	0.691837	1.31019	0.902123	0.807136	0.682193	0.688621	2.69346	2.46208	0.383521	1.63715	0.655872	0.545962	0.755668	0.502113	0.767317	0.313793	0.408991	0.426036	0.62221	0.352709	0.232994	1.16375	0.508721	0.684282	1.92318	0.439586	0.670268	0.882554
NRAS	11.0775	10.1207	7.64559	22.4004	13.9998	7.87524	7.91784	13.3945	12.5053	5.98544	3.89576	9.75645	11.7402	11.8168	13.6247	10.3142	12.451	5.97934	4.92754	5.74191	13.6436	7.26723	12.9201	21.7005	4.83643	6.18502	8.60975	21.4914	18.1307	5.55561	7.22898	9.88374	8.36944	7.30131	9.08662	23.644	8.40629	6.62001	8.49471	10.8564	5.48408	10.3082	8.51427	5.66405	17.8674	26.283	5.94215	10.026	10.2304
NRG1	0	3.52692	0.167733	0.00530617	0.0454657	0.173501	0.0728604	0.00286369	0.0226405	0.00209888	0	4.31797	0.541138	0.094023	1.01278	0.0132877	0.0096166	0.0148109	4.99462	0.0147392	0.0204209	0.0282805	0.0258337	1.05316	0	0.856054	0.00353521	0.00538878	0.0519972	1.25082	0.0222852	0.0206234	0	0.175935	0.0977386	0.291412	1.0838	0.0206593	0.0532184	0	0	0	0	0.87933	0.00573779	0	0.00642904	0.490907	0.0631204
NRG2	0.0217201	0.452221	0.0247278	0.00332457	0.121542	1.13055	0.0219123	0.0143539	0.0202648	1.56754	0.0250953	0.05787	0	0.0188512	0.111922	0.0237868	0.066278	0.738255	0.100391	0.339842	0.087004	0.0926847	1.55727	0.825068	0.0736498	0.0348447	0.0841692	0.0315124	2.02713	0.0702871	0.0111702	0.246945	0.00632717	0.0152044	0.0251233	0.0157061	0.188408	0.279591	0.0735866	0.0591783	0.821775	0.0408026	0.022691	0.346977	0.191733	0.0820283	0.0886183	1.45202	0.0818234
NRG3	0	0.0200073	0.0440732	0.0059255	0	0.0155002	0.00650917	0.00639587	0	0	0.00447282	0.0200557	0	0	0.00356219	0	0.010739	0.00735093	0	0.00987573	0.00456089	0	0.0455511	0.0178465	0.023867	0.00443607	0	0.00401183	0.180651	0.0313188	1.21445	0.0818863	0.0733013	0.13098	0.0111945	0	0	0.00461412	0.0163945	0.00753396	0.00717979	0	0	0.00417857	0.02563	1.53512	0.0287177	2.41753	0.0777796
NRG4	0.0039028	0.0691555	0.037027	2.70613	0.0545986	0.031253	0.0328111	0.03224	1.45288	0.0141778	0.293103	0.0288845	0.547941	0.0508094	0.0215473	0.0128225	0.0920258	0.0963409	0.11838	0.730122	0.00919612	0.0636776	1.45114	0.028787	0.0842153	0.0134167	0.0716401	0.0444898	0.0975659	0.397833	0.190677	0.26314	0.0397916	0.100174	0.304715	0.32455	0.444337	0.0348879	0.0165281	0.0683582	0.123051	0.164962	0.00679541	0.299096	0.865602	0.133356	0.0289518	0.843656	0.147025
NRP1	3.80362	2.2924	2.4219	1.42811	10.6237	5.87023	5.31521	4.93552	2.22752	0.701604	0.994316	3.98924	2.51532	8.63574	4.20873	10.2253	4.2617	4.22769	3.68474	4.22414	22.5707	5.59082	14.2701	5.66734	6.14093	2.38042	8.83345	12.9979	7.16272	4.56336	12.572	4.3481	4.94435	5.92681	2.39247	2.86043	11.7642	3.6266	6.31477	8.68249	7.26611	6.23456	4.2475	2.01968	15.6505	8.40948	4.118	39.0701	10.9414
NRP2	0.651391	0.645759	0.351224	0.334151	1.86306	1.52564	0.909942	1.49873	0.1727	0.148857	0.434263	0.766537	0.605582	0.196217	0.533078	0.668495	0.219504	0.442706	1.03066	0.264338	1.74295	1.03212	1.11727	0.969269	0.531395	0.681663	0.665718	0.784869	1.04086	0.660727	0.792076	1.36926	0.314883	0.623145	0.680314	0.424029	1.34825	0.57766	1.85801	0.291487	0.728528	0.318528	0.426855	0.4606	1.30189	0.223617	0.864756	0.685832	2.09904
NRTN	3.70037	2.95425	10.7503	8.92952	2.13631	1.03972	1.99456	6.11356	8.82106	11.2556	21.4179	4.83519	1.07934	5.22462	3.19316	2.4625	2.99601	7.19456	1.17636	9.66564	5.50682	9.75508	4.80542	1.32225	2.31956	13.7758	3.64719	3.76136	1.94748	2.75014	9.74277	12.78	8.32949	5.22608	5.1966	3.84085	3.10361	4.29438	1.19968	3.48011	1.80602	1.85703	5.91889	8.33225	7.01357	25.7272	3.54619	4.1462	4.04636
NTF3	0.0134532	0.0496633	0	0.108108	0.0823399	0.22444	0.169653	0.144474	0.00627591	0.154761	2.02846	0.0348484	0.0124263	0	0.0371376	0.0294666	0.01866	0.0830235	0.281758	0.0514796	0.0158498	0.422118	0.0316595	0.0434135	0.0414709	0.0924963	0.102895	0.0209127	0.190579	0.380933	0.242155	0.071142	0.0783797	0.070631	0.0583542	0.0182404	0.109404	0.160348	0.519883	0	0.124755	0.0421212	0	0.12343	0.0519566	0.193552	0.174648	0.0134636	0.777103
NTF4	0	0	0	0	0	0	0	0	0	0	0	0.00531521	0	0	0	0	0	0.00681857	0	0	0	0	0	0	0	0.0082296	0	0.00744258	0.0359074	0	0	0.00949449	0	0	0	0	0	0.0256797	0	0	0	0	0	0	0	0	0	0.114997	0
NTS	0	0.167808	3.6418	6.26208	0.463698	0.117968	0	0	0	0.0305802	0	0.271011	0.0933048	0	0	0.0691423	0	0.0719304	0	0.0536867	0.0595057	0.0475432	0.0891454	0.0465683	0	0.376201	0.115891	0.484165	0.35775	0.143015	0.162345	0.0333864	0.036783	0.0294636	0.383393	0.0342404	0.136914	0.0301001	0	0	0.0468372	0	0.0219857	0.0545176	23.6026	0.340623	0.0234174	0.113731	2.45768
NUDT6	0.271095	0.29253	0.135663	0.941614	0.573043	0.508925	1.31737	0.182108	0.91722	0.324662	0.371735	0.286623	0.104563	1.33157	0.773026	1.11252	0.0909047	0.534567	1.01118	0.205192	1.28808	0.119646	0.962792	0.760833	0.528036	0.225305	1.46127	0.120402	1.13696	0.602522	0.199169	0.255996	0.269022	0.483115	0.861457	0.465846	0.414539	0.415434	0.394254	2.15672	2.01666	0.177218	1.09706	0.565938	0.157785	0.251802	0.972368	0.444223	0.344161
OGFR	16.1941	11.7373	39.1661	21.8631	23.5866	12.1554	14.2183	11.6803	41.392	24.0593	20.9975	12.2757	8.23879	23.2907	9.82527	14.9681	16.9186	13.0835	16.1465	9.90715	18.1146	29.4859	15.2648	15.0272	11.0253	13.2357	14.3085	20.2052	12.3531	8.48636	26.5332	21.5967	17.9731	17.7583	20.0331	13.3166	19.2963	10.9548	8.67428	15.896	11.106	20.7556	13.5748	15.6316	17.7907	29.9755	17.0221	16.5451	13.2719
OGN	0.00591237	0.196432	0	0.0180995	0.258474	1.61763	0.17894	1.69965	0.0110325	0	0.177609	0.0525087	0.273052	0.00641429	0.190413	0.00647493	0.0164012	0.68483	0.31597	0	0.0208969	3.76216	0.185515	0.0054512	0	1.3821	0.319555	0.0183812	0.0985354	0.325255	0.121625	0.101612	0.034446	0.144856	0.239356	0.112227	1.82706	0.584894	2.86691	0	0.0438614	0.00925563	0	0.140398	0.0521912	0.0212654	0.0328944	0.00591694	7.76583
OPRD1	0.0210112	0.0201666	0.0239207	0.0225125	0.106553	0.011217	0.0176643	0.00347136	0.0333258	0.010177	0.00242763	0.00777517	0.0232888	0.00455898	0.0174004	0.0161073	0.037886	0.00199486	0.018209	0.033947	0.00495085	0.00791115	0.0131855	0.00387447	0.00323846	0.00722303	0.00428538	0.0261291	0.0700345	0.0135986	0.0756395	0.0611102	0.0153017	0.026965	0.0151896	0.0113951	0.00379706	0.0100173	0.00889811	0.00408906	0.0350715	0.0361816	0.018292	0.0226792	0.0857825	0.0623473	0.00779327	0.0693906	0.0105537
OPRK1	0.0752823	0	0	0.322121	0.00598392	0	0	0	0	0.00414362	0	0.00253255	0	0	0	0.00374752	0.00949258	0	0	0	0.00806303	0	0	0.0757202	0	0.00392118	0	0	0	0	0.0351965	0	0	0.00399233	0.0049476	0	0	0	0	0.013319	0	0	0	0	0	0.00307696	0	0	0
OPRL1	0.182574	0.171559	0.115475	0.05081	0.396665	0.450421	0.0465124	0.109687	0.567803	0.0267975	0.0511381	0.0982708	0.0306612	0.0360133	0.290179	0.17571	0.138128	0.162835	0.103884	0.108205	0.0391088	0.340242	0.429651	0.045909	0.102328	0.202872	0.163618	0.160537	0.525569	0.107421	0.199169	1.33849	0.0483496	0.464744	0.255976	0.225037	0.309943	0.675905	0.333877	0.0753693	0.246261	0.0692881	0.144496	0.125407	0.262506	0.487532	0.256509	1.10736	0.430735
OPRM1	0	0	0	0	0	0	0	0	0	0	0	0	0	0	0	0	0	0	0	0	0	0	0	0	0	0	0	0	0	0	0	0	0	0.00281598	0	0	0	0	0	0	0	0.00377848	0	0	0	0.00434066	0	0.00241551	0
OSGIN1	137.496	15.1755	51.7823	7.37456	185.919	58.9097	40.6384	22.5954	103.971	126.529	36.9404	136.989	74.9871	49.6776	13.7333	111.512	11.0747	62.0465	57.3356	9.88765	138.463	10.9043	81.303	191.907	100.044	23.7353	156.009	3.39918	96.005	60.3075	2.14507	6.40696	23.3667	6.49501	35.7738	101.933	54.8046	40.6641	48.5399	153.998	28.2171	14.8537	104.085	115.396	11.3214	4.07712	146.246	24.2276	7.7959
OSM	0.269354	0.0891473	0.246732	0.12795	0.146179	0.793359	0.0780854	0.0306905	0.0779917	0.0449879	0.053657	0.0481185	0.0343162	0.211608	0.102559	0.11189	0.0772967	0.388007	0.818348	0.0631847	0.12037	0.0932573	0.604728	0.222653	0.0143157	0.0638592	0.0189436	0.105879	0.510822	0.150283	0.310483	0.994604	0.148811	0.0650179	0.0402876	0.0419771	0.285345	0.166056	0.727686	0.0542274	0.0344521	0.189022	0.0889463	0.0501271	1.79353	0.150332	0.137802	1.71962	0.559836
OSMR	1.05921	1.95809	3.84821	1.66525	2.88604	7.5322	4.55134	1.39274	0.319198	0.162396	0.332039	1.48478	0.384261	0.0920487	1.1459	7.4545	3.06736	2.39326	0.351837	2.51822	0.515926	1.95799	6.32926	2.8263	0.181395	0.668029	1.43184	0.660871	3.39825	1.82453	1.11901	1.29536	0.159458	1.24535	0.86268	1.71938	3.25455	3.47095	3.53521	1.71513	0.263957	0.402755	0.166793	1.12852	28.6392	1.46433	4.9591	26.3664	8.48908
OSTN	0	0.0630488	0	0.0513507	0	0	0.0307684	0	0.0512192	0	0	0.00902876	0	0.00661754	0	0.0200403	0	0.0115825	0.026431	0.0466819	0	0.0229667	0.00956964	0	0.018803	0	0	0.00632122	0	0	0.0156848	0.0483839	0.0355375	0.0426989	0.061735	0.0716754	0.077162	0.0181755	0	0.0118708	0	0.00954891	0	0.00658395	0.00673062	0.00548481	0	0.0122089	0.0153191
OXT	0	14.8358	0	0.0292925	0	0.510831	0	0.0632356	8.21337	3.98586	0.0884451	0.0283271	3.74743	0	0.246534	0	1.64573	0.145356	0.110567	1.30188	0	0.0480375	0.0600481	0.176447	0	63.3326	0	0.0793295	0	0	1.67314	2.83362	10.5921	3.79567	0	0.311367	0	0.433385	0	0.0744878	3.62029	1.73762	0.0333214	0	0.295636	0.240915	0.496878	0	0.576751
OXTR	0.0260988	0.179844	0.173325	0.186424	0.403144	0.551514	0.102393	0.100611	0.0121751	0.0368703	0.0854375	0.128771	0	0.00471906	0.108068	0.0905099	0.947225	0.0412981	0.0753933	0.070278	0.0358728	0.120104	0.0477698	0.260683	0.0536347	0.0149533	0.0798453	0.0991707	0.645193	0.0211142	0.301997	0.126512	0.044349	0.213145	0.0188675	0.047181	0.0471646	0.733606	0.280922	0.0338611	0.0322693	0.115761	0.0189343	0.0563413	0.16799	0.219033	0.121004	0.134948	0.284032
PAK1	6.05976	4.71103	1.0469	2.91047	3.13976	5.00066	1.5252	4.66075	6.31392	2.57427	3.13335	3.73503	3.81207	2.91172	3.75748	5.11381	7.04743	4.17291	5.06517	1.76004	5.04229	4.96855	10.04	5.01516	0.658213	3.46122	0.289273	5.49807	8.30688	2.63277	12.8247	6.56882	4.06803	4.24774	5.71932	6.64667	3.50385	4.43052	2.19136	3.00893	3.84451	5.80698	3.37047	2.26439	8.38568	4.68649	0.99432	4.46098	10.6351
PAK2	8.65881	6.69115	5.56768	16.6376	8.79476	8.37159	7.18737	18.6258	14.1676	9.40427	5.38751	16.8216	10.8759	8.68042	12.2697	16.3761	17.3482	6.71943	5.50925	5.79453	10.7658	11.3901	15.5546	11.1277	5.28523	4.65425	8.01575	18.5339	34.3572	5.95367	14.7442	15.1897	15.9551	16.1014	6.15328	12.1065	15.4271	6.09145	12.7183	9.44641	6.9347	15.6876	6.80483	6.93275	21.7315	10.5877	11.203	24.7272	17.5267
PAK3	0	0.0702905	0.00361293	0.0626614	0.0199781	0	0.00640312	0	0	0.0368908	0.00219998	0.00281842	0	0	0.00175208	0.00208527	0.00264102	0	0	1.1253	0.00224329	0.00238976	0.0089618	0.00175557	0	0	0.00194176	0.00591971	0.0253868	0.0123234	0.0342732	0.0151035	0.0138668	0	0.110121	0.0430274	0.0240869	0.0885095	0.0221752	0.0704066	0	0	0	0.00822099	0.569381	0.00342429	0	0	0.0836854
PAK4	3.29228	3.83251	3.37744	7.71312	4.16468	3.39218	3.37801	5.12928	5.3246	8.66834	5.57987	4.61178	1.74861	8.02674	3.57286	7.20503	5.90617	3.40088	1.55056	11.2781	4.43474	5.3512	8.07459	2.56476	2.42447	3.98449	4.97279	18.3375	14.3542	4.22853	13.1634	13.7068	7.71343	14.0957	6.77114	4.80429	3.98971	2.73499	1.98386	4.83359	6.94026	3.06299	6.96248	4.53066	11.3887	31.5841	6.04428	8.57537	5.12529
PAK6	0	0	0	0	0	0	0	0.010048	0	0	0	0	0.0280875	0.00329903	0	0.00333022	0.0168711	0	0	0.00258581	0	0.0114495	0.00477074	0.00280369	0	0	0	0	0.00506793	0	0.0156386	0.0402013	0	0.00354778	0	0	0	0	0	0.00591796	0	0	0	0	0.0134216	0.00546867	0	0	0.00381851
PDCD1	0.222914	0.13715	3.68336	0.341201	3.34586	1.02889	0.140554	0.061381	0.207978	1.93448	0.418524	0.096237	0.154423	0.0201531	0.0512794	0.915465	0.270539	0.47619	0.0536621	0.876688	0.0765988	0.69943	0.138432	0.0256908	0.0858941	0.947245	0.0757745	6.21798	0.433425	0.450848	0.620967	3.21712	0.108226	0.574325	0.201438	0.0671634	2.70239	0.354253	0.953858	0.090379	0.413426	0.741549	0	0.210534	0.379204	0.751658	0.499531	0.17661	14.3691
PDGFA	2.33198	4.15938	0.682124	0.445273	0.827167	5.65653	0.763525	7.65866	1.5005	3.12165	3.36111	5.22668	7.71583	5.71676	1.57127	0.673434	2.13229	4.76491	18.3581	0.341895	3.0762	7.43868	2.22631	4.06466	0.831131	2.43372	0.424491	0.838234	7.12651	2.04349	27.3793	4.61502	0.406487	0.590497	5.42344	3.95919	7.46256	8.73306	8.65883	0.276167	1.01765	19.1344	5.13928	3.88033	5.77792	0.323254	4.13178	2.79296	11.7192
PDGFB	1.42525	3.32642	0.534925	3.47608	2.53798	3.21212	3.36202	3.27763	1.43691	1.31492	1.27274	2.26033	1.24412	11.9055	2.44999	3.79066	1.10067	1.67039	4.01163	1.05658	4.38546	4.67835	5.76206	5.2563	4.03941	1.51354	6.34616	3.7926	4.45479	2.63552	10.0012	4.29987	3.10245	3.44137	2.83818	1.34962	5.08524	3.72728	6.74332	2.26571	6.32268	8.64684	3.02699	1.48767	6.57293	6.12149	2.80779	1.4577	5.1397
PDGFC	0.340532	0.8683	0.279774	3.10053	0.920858	1.59305	1.6823	1.96623	1.44118	0.85446	0.413729	1.51476	1.65375	2.98599	2.07066	3.62168	0.876481	1.69654	1.33867	0.752286	3.96646	1.83734	5.08638	1.22027	2.24013	1.87062	4.0992	0.796749	2.19405	2.23235	2.20265	0.640479	0.920397	0.942041	0.766455	1.12333	1.46553	1.02097	1.02956	2.03598	2.14862	0.181361	2.58257	0.629029	2.29713	2.9768	1.08077	1.58452	4.37753
PDGFD	0.695003	0.67964	0.1048	0.313504	0.804869	0.755578	0.673291	2.34212	0.219008	0.507179	0.292484	0.953798	0.714222	0.639155	1.62632	1.37609	0.593714	0.891458	1.3562	0.544028	2.09313	0.762519	1.29978	1.71868	0.993172	0.785855	1.99014	0.896725	1.72593	1.24368	11.9537	1.02225	0.422345	1.18675	1.22448	0.607407	1.35579	1.19592	3.48907	0.644932	3.2438	0.10808	1.44252	0.486869	1.15287	0.947758	0.392651	7.1028	3.05745
PDGFRA	0.0242108	0.195137	1.37817	0.03397	0.0388094	2.12187	0.122125	0.409998	0.0188239	0.0122154	0.219122	0.0209048	0.626155	0	0.044556	0.00220954	0.0167905	1.18571	0.0495404	3.78298	0.0594247	1.81558	0.227901	0.0111612	0.0124387	0.679708	0.115219	0.666977	0.443847	1.15889	0.48767	0.720165	0.0528954	0.0494315	0.0875133	0.0401207	3.27781	1.23242	1.37563	0.0471174	0.0411606	0.00631688	0.151056	0.374571	0.955062	0.128807	0.823171	1.53858	8.00336
PDGFRB	2.81443	3.3718	2.584	3.02563	5.61918	16.8683	5.41221	17.754	9.36376	1.76563	2.59062	4.56295	2.40392	3.94578	2.0404	1.41306	0.648706	5.03075	6.24669	6.3352	7.67205	7.04734	14.9427	7.01867	3.55341	2.64183	5.63921	13.5368	6.54289	4.8654	13.7171	6.06667	22.1313	36.8543	3.1663	6.22185	10.7092	9.82085	18.225	3.85496	5.11772	7.77816	8.26551	3.81885	6.49035	5.87778	5.50012	3.87111	39.1831
PDGFRL	0.11411	0.884607	0.293846	0.486555	0.22805	0.598302	0.328912	1.50821	0.152091	0.592182	0.339021	0.458454	0.391481	0.274121	0.907497	0.294565	0.463513	0.247631	0.43559	0.672298	0.172848	0.480794	1.70072	0.112724	0.0879384	0.242836	0.0498715	1.46127	0.882953	0.448391	0.607801	2.02578	0.783528	1.19818	0.294617	0.589388	0.191484	1.17548	0.371064	0.0158623	0.151166	0.765578	0.560571	0.378302	0.998303	0.776876	0.695329	4.44555	0.85974
PDIA2	0.113548	0.348231	0.232025	2.28615	21.8111	0.0466293	0.0587447	0.0288611	0.0896412	1.93551	1.2211	0.290894	0.112947	0.0189518	0.0803712	0.0669585	0.363446	0	0.138774	0.0074273	0.0308712	0.0438492	2.67211	0.00805313	0.0269247	0.170149	0.124701	0	0.887962	0.0141325	0.0224597	9.91898	0.0127219	0.0611423	0.0126287	0.01579	0.126276	0.171773	0.0277423	0.577943	0.0809962	0.0273469	0.152081	0.160273	0.0192757	2.45828	0.0485953	0.480764	0.0767762
PDIA3	104.524	102.947	142.954	139.365	192.175	166.913	84.0935	189.758	109.065	129.311	142.923	95.6699	149.349	116.844	89.7321	78.0659	138.721	137.841	96.9807	203.989	55.6225	192.682	156.225	70.296	71.1332	72.3069	93.8314	134.326	204.268	101.768	236.133	99.6259	103.988	103.723	115.479	153.779	120.1	104.118	205.695	113.303	95.1194	138.915	74.3704	134.02	134.773	109.586	129.759	253.853	153.071
PDK1	0.598958	1.1971	0.493149	0.863277	1.02202	0.276442	4.13263	1.22061	0.840701	0.523991	0.199683	1.21562	0.760394	2.17842	1.22246	2.14556	0.252524	0.380781	0.240101	0.549709	1.32272	0.427196	2.22813	1.06312	1.65724	0.237348	0.808578	0.913289	0.545283	0.456812	0.305318	1.05695	0.309373	0.370948	0.44254	1.17699	1.61646	0.627409	0.42462	1.69969	0.665533	0.929388	0.203293	0.491288	2.9901	0.883789	1.20622	0.914974	0.778632
PDYN	0	0	0	0.0369475	0	0	0	0	0	0	0	0	0	0	0	0	0	0	0	0	0.0325013	0.00865586	0	0	0	0	0	0	0	0	0	0	0	0.00804636	0	0	0	0	0	0	0.012791	0	0	0	0	0.00620148	0	0	0
PENK	0	0	0	0	0	0	0	0	0	0	0	0	0	0	0.00522936	0	0	0	0	0	0	0	0.00891597	0.00523978	0	0	0.0173865	0	0	0	0	0.00751315	0	0	0	0	0	0	0	0	0	0	0	0	0	0	0	0	0
PF4	0	0	0.123366	0.0248793	0	0	0.10932	0	0.151651	0.0787288	0.0751197	0	0	0	0.029913	0.178007	0	0.0308642	0.0469544	0.0552866	0	0.0816001	1.70854	0.0299726	0.0501049	0	0.0663027	0	0.108356	0.052599	0.0835917	0.0859535	0	0.0379271	0	0	0.0587475	0.0193732	0.413011	0.189796	0.0602912	0	0.0283011	0.0350889	0.430448	0.0292312	0.120576	15.9739	0.0408214
PF4V1	0.0376149	1.33303	0	0.0287875	0	0.150607	0	0	0	0	0	0	0	0	0.0692239	0	0	0.357126	0	0	0	0	0	0	0	0.775853	0	0.233885	0.0626889	0.791202	0.290169	1.93939	0	0	0.0543856	0.0339999	0	2.71239	0	5.49027	0	0	0	0	0.0415055	0.101469	0.209276	45.2857	0
PGF	0.391909	0.610311	0.718635	0.594832	1.69317	2.20651	0.985673	0.587639	0.531576	0.370879	0.391928	0.623975	1.45405	0.0428752	0.0939434	0.364279	0.461365	0.72229	1.91226	0.260446	0.488886	1.86829	1.82906	1.62148	1.83245	0.630234	0.486983	1.40272	1.76736	1.04443	7.89267	2.08987	0.762698	0.226698	0.499979	0.690627	0.791564	2.40623	2.02234	0.352512	0.989496	0.711479	0.619301	1.24063	1.59896	0.61004	0.390892	1.03162	2.59299
PGR	0.00128283	0.0104184	0	0.0471253	0.00224328	0.0342423	0.0129418	0.014836	0	0	0.111163	0	0.00473961	0	0.00708249	0.00280978	0.00177932	0.0133975	0.00741159	0	0.00302271	0.0354208	0.00905665	0.00473107	0	0.00146999	0.00261641	0.00265883	0.0213796	0.0145295	0.029688	0.176377	0.00186847	0.00149667	0.202171	0.0057977	0.0139096	0.0313444	0.0502524	0.00748966	0.00475838	0	0	0.00969267	0.0764378	0.00115351	0.0404442	0.00256764	0.122427
PGRMC2	19.6223	10.6735	27.4632	34.6279	22.3858	16.2412	19.3263	16.9142	28.7899	29.476	21.4209	9.11928	34.4688	37.2483	21.1529	25.2266	15.9897	18.0536	43.0924	15.3683	33.4241	13.4137	27.5418	22.7956	29.1774	27.9471	28.399	15.1796	17.3097	14.6281	16.6224	10.1228	19.4615	14.4896	21.4914	16.01	19.0074	12.3363	26.3785	27.3995	27.9929	14.4454	37.857	25.0375	11.8774	22.35	18.2464	13.5419	23.5049
PIK3CA	0.84916	0.648509	0.510689	1.71651	1.03981	1.06928	1.17521	2.59905	0.953831	0.836244	0.458014	4.02554	0.597407	1.23135	1.55122	3.16231	1.50192	0.623974	0.777494	0.860465	2.26633	0.785567	1.91159	1.97751	0.64958	0.592916	1.26383	1.63459	3.15727	0.931725	0.944228	1.18605	1.29152	1.58951	0.956265	1.88964	2.08882	0.617958	1.05145	1.13691	0.646207	1.57756	0.919084	0.788206	2.08118	0.885501	0.723561	2.07756	2.11952
PIK3CB	2.12858	1.92982	1.99809	3.26767	1.74959	2.83755	2.10283	4.773	3.19714	2.27463	1.37562	5.07409	2.61068	2.45311	2.33151	3.85689	5.0444	2.76186	1.40176	2.06102	2.18362	3.38099	4.48924	2.43301	1.13343	1.43884	1.85695	3.70412	3.31821	2.06807	3.2802	3.64403	1.61028	3.08163	2.8534	7.15343	4.13145	2.36264	2.20858	4.06948	1.59117	4.98072	1.57656	2.59184	6.34797	2.12317	2.46781	2.6559	3.9387
PIK3CD	0.638788	0.288469	2.79483	0.73569	1.96839	1.36988	0.865509	0.271528	0.228558	0.322922	0.329616	0.245562	0.567112	0.211942	0.188321	1.6878	0.959133	0.526992	0.358313	0.61175	0.474932	1.9576	1.16758	0.5375	0.325001	0.778181	0.170762	3.02071	0.480621	0.521803	0.765474	2.24242	0.564569	0.719945	0.479731	0.372785	2.31999	1.1864	1.38544	0.356052	0.437083	0.66505	0.116083	0.358138	1.27285	0.535357	1.10415	2.51368	3.29813
PIK3CG	0.135756	0.088007	0.0691099	0.131772	0.214236	0.220958	0.172588	0.23523	0.0247142	0.0200473	0.011477	0.134781	0.024467	0.0538833	0.118825	0.580189	0.0367409	0.0534424	0.0286952	0.050681	0.12093	0.141293	0.207789	0.207594	0.0204137	0.0531191	0.0945456	0.25049	0.0993296	0.080362	0.0425711	0.21887	0.0819864	0.0656721	0.0526614	0.0568652	0.783868	0.124315	0.213842	0.00644389	0.0429867	0.0414677	0.0259435	0.0321659	0.328825	0.0952748	0.135094	0.0960969	0.644469
PIK3R1	6.53223	4.79319	0.536339	6.12834	3.08693	5.48111	5.54994	19.9996	10.4145	6.20073	6.05554	10.607	3.17681	9.64291	27.3151	19.1806	1.42153	4.42545	9.39553	5.89582	15.7248	3.96873	6.71912	12.1715	4.23299	6.82285	13.2113	6.55589	4.19416	9.39491	4.15469	3.7441	8.34032	5.33392	12.4584	17.0556	14.4313	2.52351	2.6953	5.11413	13.275	2.13541	3.37845	2.00383	5.74698	7.31674	3.90622	2.4492	13.4215
PIK3R2	0.164927	0.176242	0.774119	0.342128	0.295998	0.069511	0.0656787	0.0717062	0.238913	0.152411	0.356038	0.083516	0.489082	0.141259	0.0918548	0.0760504	0.180598	0.247241	0.0501511	0.417045	0.189194	0.664561	0.238321	0.056023	0.454887	0.193963	0.106225	0.584713	0.448467	0.02809	0.680781	0.367221	0.20229	0.445602	0.163157	0.235384	0.0392169	0.108634	0.183804	0.152038	0.144891	0.896863	0.185146	0.229552	0.555535	0.413682	0.112687	0.642843	0.196203
PIK3R3	0.985724	1.07209	0.859766	1.5676	1.11209	1.39339	1.63513	1.47971	2.14839	1.11661	1.10522	0.629515	2.03634	1.10965	1.20937	1.31167	1.52526	1.43651	2.35763	1.27534	0.93343	1.736	3.67494	1.87142	0.890339	0.977721	1.7024	1.04074	1.55007	1.86932	0.660927	1.77257	0.45156	0.649214	2.21444	3.61905	1.48446	0.76904	4.09312	0.943703	1.31215	2.36031	1.0081	1.1126	2.54377	1.41769	0.791183	0.745168	4.70163
PIK3R5	0.701063	0.303222	0.387158	0.176177	0.507762	0.761102	0.413451	0.155587	0.119591	0.158381	0.111829	0.263299	0.3576	0.156089	0.182937	0.802147	0.344691	0.350189	0.234259	0.284727	0.231143	0.587682	0.545833	0.325601	0.133052	0.380691	0.0960356	0.726521	0.283378	0.575632	0.787005	1.17236	0.224797	0.350975	0.283666	0.307385	1.13929	0.395971	0.720082	0.17309	0.160102	0.339895	0.0455472	0.166591	0.894807	0.145836	0.761659	0.586415	1.40263
PLAU	2.26967	1.86737	0.884053	1.3448	1.95539	4.75255	1.75704	1.86942	1.124	0.854328	0.561386	0.729053	1.53696	1.0687	0.802317	1.37767	0.590844	2.74258	3.94162	0.798039	1.08215	2.3056	5.38821	2.24605	0.995101	1.00677	1.36431	3.00737	5.30233	0.883092	2.85821	7.95457	1.16334	0.823134	1.60712	1.08894	3.45212	1.73339	3.86167	0.803105	0.728318	1.19826	1.74995	1.7386	9.81207	0.790014	2.02438	3.91671	5.44942
PLAUR	1.09255	0.774112	1.36253	0.418074	0.762674	2.08728	0.488884	0.327528	0.230174	0.512117	0.24941	0.436899	0.569679	0.678677	0.178364	0.685094	0.617154	0.769603	1.48897	0.45703	0.493071	1.06159	2.63675	0.491478	0.332714	0.6916	0.15724	1.23723	1.84286	0.712807	1.77851	5.17179	0.397829	0.287827	0.522307	0.382275	1.06681	0.960896	2.02891	0.111456	0.375843	0.593104	0.809245	0.551598	5.26942	0.404055	0.408504	4.15312	2.41195
PLCG1	2.11247	1.8797	0.691223	3.30976	3.90049	2.8547	2.54932	2.11155	3.52793	1.21246	1.0158	2.69157	1.99257	7.89325	3.53746	2.31347	1.48761	1.38153	2.39864	1.04354	12.3792	1.87481	6.54376	6.48106	2.40902	1.25931	10.8543	5.94538	3.38836	2.00537	4.43247	2.89767	1.8556	5.18326	2.29221	7.26804	7.35929	3.50751	2.49941	6.2895	3.88391	3.27833	4.73235	0.75786	10.651	10.2094	1.84561	2.14873	5.72192
PLCG2	2.70171	2.02172	0.435993	0.39651	0.867606	2.08028	1.09507	3.16758	0.663627	1.60918	1.83809	1.75582	1.11661	0.133375	2.99643	3.84353	0.840412	0.943493	1.89619	0.652132	1.4139	2.33464	0.946	3.51786	1.6625	1.28632	6.03568	1.09354	1.61472	1.60554	3.308	1.78006	0.343202	0.805946	3.74546	2.73574	2.6528	1.10944	2.38934	4.0018	1.21332	1.5511	0.406451	2.03628	0.91405	0.582993	2.07096	0.928607	2.68872
PLXNA1	0.995744	0.539123	1.65789	1.67791	1.79146	1.54447	0.669702	0.58987	0.9692	0.549649	0.518233	2.1803	0.480581	1.58635	0.5514	1.39897	0.858535	1.41893	0.31097	0.775023	0.560143	1.48166	4.82027	1.40441	0.312478	0.50575	0.673302	5.03494	1.91665	0.624132	2.4728	4.1508	1.74823	2.25438	0.464335	1.49359	1.44606	2.17798	1.01624	3.15293	0.76532	1.31445	0.757541	0.563539	5.63226	3.64115	0.718699	2.58734	2.04341
PLXNA2	1.45186	1.13819	1.56531	0.514678	0.824695	1.37864	1.50207	3.90757	1.61779	0.583145	0.70457	3.41862	0.794879	3.62631	0.495573	3.89465	0.859654	0.978024	1.66693	2.39526	2.43062	1.4252	1.73906	2.34487	1.86223	0.618779	3.44645	1.07491	2.04686	1.0789	2.84669	1.89867	3.54865	2.04129	0.465567	1.71671	1.89764	1.96906	1.50093	1.80788	1.41372	4.91593	1.47235	1.01809	2.13813	5.10156	3.35577	2.70063	3.76614
PLXNA3	0.127435	0.326826	0.766766	0.751995	1.41917	1.41882	0.369334	0.0747973	1.06224	0.572576	0.92217	0.323894	0.489412	0.078222	0.0478301	0.258921	0.548871	1.45347	0.225237	1.22052	0.0671662	1.39315	4.30503	1.25688	0.219674	0.128735	0.0786573	1.70291	2.29428	0.556175	2.97935	1.18595	0.842577	1.03683	0.281226	1.18825	0.833301	0.891345	1.06693	2.62363	0.817881	4.62513	0.505079	0.162889	7.15474	1.86055	0.830278	2.32748	2.29296
PLXNA4	0.00359791	0.00354183	0	0.14961	0.00419444	0.0672268	0.00806609	0.0079257	0	0.00145224	0.00831401	0.0035504	0.0243706	0.00390334	1.60126	0.00525367	0	0.0125251	0.0103935	0	0.00141295	0.0632187	0.0150524	0.00221151	0.00554545	0.0288599	0.0171224	0.00124285	0.00599626	0.0310479	0.0339227	0.0158551	0.00174681	0.00279843	0.00520205	0.699207	0.0260079	0.0378802	0.0317435	0	0.00222428	0	0.00104409	0.00906157	0.0052934	0.00862722	0.0489317	0.00120023	0.201803
PLXNB1	8.96718	7.96552	31.1817	19.1386	8.54777	10.3498	9.16523	4.9828	16.3638	6.34648	9.15325	3.8849	18.2125	13.9065	8.9474	13.2691	19.4834	10.9308	2.01929	17.8425	10.0132	17.6678	6.12897	9.00801	7.29766	11.2649	11.7141	24.4895	7.23866	10.3767	18.3895	5.00863	22.393	33.8571	5.69653	16.0339	16.8868	9.47966	7.28538	5.20202	7.29964	27.5104	14.8265	7.94139	16.7775	31.2043	11.0181	10.2844	20.2204
PLXNB2	40.355	23.8536	17.6759	35.0922	26.0652	36.1686	14.7626	80.5476	51.0681	12.4401	33.8151	21.3061	17.8237	37.6165	32.0294	65.292	20.3328	40.2869	6.13167	26.8222	39.7055	32.063	88.356	43.7082	15.2881	47.9107	44.7071	38.7249	46.9007	23.1411	104.61	45.6491	18.9949	16.3295	21.8524	39.5532	39.5076	31.6069	28.3736	39.2022	29.5462	60.4678	26.2167	22.1429	69.9417	24.0761	35.3553	46.947	57.3237
PLXNB3	0.0392308	0.0144822	0	0.0621928	0.0196008	0.179516	0.0471164	3.99075	0.0130722	0.0237524	0.045327	0.0808819	0.0828252	0.0152004	0.559531	0.0675141	0.0116601	0.061191	0.0202372	0.17633	0.0231097	0.538093	0.20003	0.020669	0	0.0449545	0.0685831	0.290396	0.0747221	0.0634761	0.770995	1.7004	0.0244888	0.0523088	0.956169	0.0582564	0.0708961	1.14058	0.0830698	0.0218138	0.0519707	0.0131602	0.00243954	0.0060493	0.53183	0.61229	0.0779522	1.82283	0.584118
PLXNC1	3.23907	1.43252	0.486102	0.506121	1.5072	0.842864	1.78646	2.31315	0.153789	1.76271	0.468087	0.480621	0.6677	0.568796	1.95531	0.463254	0.479291	0.203634	0.499112	0.484668	0.828262	0.969578	4.39933	0.908193	0.0857059	0.953513	0.194422	1.90576	1.68798	0.687644	1.69541	2.67535	3.01694	2.69697	2.09898	5.4696	1.69037	1.54804	0.506722	0.332381	0.0920803	0.326437	0.418399	0.842433	4.71359	1.09109	0.423548	0.381595	1.06485
PLXND1	4.1496	5.29968	6.5308	4.72509	5.84955	10.3149	4.74977	8.1183	3.9581	1.80677	2.96798	4.8499	4.23884	2.09781	3.03721	6.47218	3.88741	4.64613	7.6886	9.12842	3.53715	12.5468	23.858	8.21887	4.10535	5.31186	3.63333	12.063	7.87678	4.27055	10.074	14.1172	11.7532	12.3009	4.68199	8.12855	10.7055	8.07731	9.13887	3.48847	5.46725	11.3318	11.4205	3.94145	11.7652	16.5496	4.6817	21.4784	14.1232
PMCH	0	0	0	0	0	0	0	0.0423497	0	0	0.0296164	0	0	0.0278092	0	0.0280721	0	0	0	0	0.0301995	0.257371	0.0201075	0.0236337	0	0.029373	0	0.053128	0.0427201	0	0.131826	0.101663	0	0.029906	0	0.0463392	0.0463231	0	0.108555	0	0.0475403	0	0.0669473	0.027668	0.0282844	0.0230491	0	0	0.0321882
PNOC	0	0	0.473154	0.0353412	0.807519	0	0.0310579	0	0	0.134202	0	0.0205058	0.119429	0	0	0.202288	0	0.0175371	0	0.0706816	0.0108809	0.17387	0.0144895	0.00851526	0	0.116414	0	0.172279	0.0307842	0.0597738	0.0237485	1.48959	0	0.0323255	0.0133534	0	0.133522	0.148607	0.0782247	0	0	0.0578325	0.0160808	0.0398753	0	0.10796	0.0685119	0	0.40591
POMC	0.0382997	0.0848312	0.436032	0.127017	0	0.238543	0.0643976	0.0210922	0.178668	0.139132	0.103253	0.0850365	0.188672	0.0277007	0.0469894	0.0699066	0.123953	0.157572	0.165958	0.206264	0.120327	0.208298	0.0600872	0.0470831	0.0196771	0.36573	0.0520765	0.343985	0.0425534	0.0619697	0.16414	0.405066	0.0743792	0.104263	0.0738343	0.438505	0.0461424	0.228246	1.8923	0.173918	0.284129	0.119914	0.111143	0.151581	0.154958	0.459184	0.0473525	0.17887	0.272532
PPARA	6.71235	2.95769	1.59522	4.8495	6.28583	3.98269	5.15984	3.15589	11.8226	4.03973	4.19606	9.10449	7.99312	8.58101	11.2636	17.2072	3.8856	3.47201	2.07892	2.79897	8.58884	1.6051	6.42823	10.7561	4.16439	5.48068	9.51108	7.39942	3.03744	3.79969	2.59341	3.80955	6.90577	5.3895	3.01525	20.5177	11.6927	2.71224	3.37323	8.82244	3.69421	8.67099	3.27291	4.47475	3.62382	6.6848	6.93628	2.50328	6.51516
PPARD	3.78426	4.91789	2.25696	8.65818	5.29249	4.69197	3.4296	5.45153	9.19874	9.39948	9.03476	7.45989	4.1261	2.60478	7.72639	9.60096	3.70904	6.29904	1.75622	8.21155	4.33903	4.368	7.95171	3.22101	2.14566	4.58879	4.64532	5.61088	7.59904	6.49367	9.32303	7.80427	4.69053	5.82851	5.96194	7.16766	6.19389	4.41592	6.12872	4.21818	1.11936	8.8069	2.61566	3.17169	14.7583	17.3506	4.87754	7.00122	11.5232
PPARG	2.72735	4.53605	11.2617	0.735383	5.88952	3.89911	4.28389	1.81201	2.282	1.49262	2.12508	3.1786	0.842707	4.14875	1.37538	2.63077	11.692	1.88908	4.76646	1.66718	6.60366	2.30231	8.87367	6.00465	3.10413	0.51161	1.58861	13.9006	9.39813	2.30853	0.86104	2.68177	10.8429	12.5071	1.36824	4.07071	4.07806	1.56462	4.69096	11.4278	3.43818	7.58952	9.08772	1.89099	4.8783	21.0026	2.241	8.18837	2.63259
PPBP	0	0.0202751	0.052107	0	0.096044	0	0.0461741	0	0	0.0332533	0.0317289	0	0.152191	0.0595856	0.0758074	0.180447	0.0380898	0.0521454	0.039665	0	0.0970608	0	0.086167	0.101278	0.0846528	0	0.140024	0.0284588	0	0.0444333	0	0.0726096	0.0799966	0.0320391	0	0.0248223	0	0.0327312	0.145372	0	0.101863	0	0.0239075	0	0	0.0493863	0.0509288	0.632103	0.0344841
PPP3CA	3.05467	2.11069	2.36561	8.09438	2.33823	3.32786	2.48891	5.70016	4.71602	2.07978	1.67111	4.75566	4.44619	3.92693	3.07074	4.41367	2.78455	1.81664	3.12275	2.72564	4.0204	2.79381	5.81466	4.00408	3.54127	2.43427	5.14317	3.25537	3.11354	2.51087	2.33415	1.94697	1.94206	2.72013	3.60516	3.46924	2.15093	2.74971	4.36261	4.24418	2.3262	2.61211	1.60019	3.17926	7.294	1.96776	1.93491	5.28477	3.67028
PPP3CB	2.4669	3.65406	2.93284	4.26564	8.21658	4.04351	3.02017	3.41338	2.64326	2.76781	2.60975	4.77261	2.48508	2.44214	1.9401	7.80095	4.19152	4.26709	4.00854	3.42847	4.42312	7.5323	3.78255	5.57958	3.60618	2.18195	4.2649	9.28723	5.89719	4.23472	9.00959	2.45107	5.69842	5.09966	2.89243	4.47357	6.04626	3.44335	5.16237	5.45353	4.16774	9.82963	5.05366	4.41848	10.5097	9.97851	4.58214	2.74269	7.91377
PPP3CC	1.83549	4.89558	1.38796	1.78314	1.90688	2.55819	1.95878	6.34474	1.37127	2.26361	1.68249	4.36104	2.37728	1.57247	3.30935	3.77549	1.05217	2.15421	5.61535	1.60112	2.95245	4.17379	3.34718	3.62194	1.67028	1.96358	1.66459	2.34434	2.17856	2.11506	3.2394	4.97848	3.10749	3.19242	1.4983	3.39776	3.86781	1.87691	3.39897	0.909502	2.52487	2.43868	2.23476	1.79843	3.08658	1.1206	3.31608	2.6503	4.12495
PPP3R1	8.56513	9.28083	6.01555	10.6704	28.0669	8.51703	10.8478	11.7297	20.9559	10.2726	10.6247	16.1781	8.14319	11.3952	6.8552	13.0055	9.35341	11.0255	8.06202	11.0764	16.2198	13.9374	21.5669	13.264	12.6435	6.79742	18.6957	16.7479	11.6085	8.74779	10.9146	11.5163	12.3052	16.0962	15.4145	11.605	10.3929	7.71743	12.7461	12.7033	11.1966	5.96845	15.0963	10.1652	14.0574	12.7469	9.93997	12.1126	15.345
PPP3R2	0	0	0	0.0754237	0	0.0154742	0	0	0	0	0	0	0	0	0	0	0	0	0	0.0591552	0	0	0.00454749	0	0	0	0	0.00600768	0	0	0	0.275904	0.0844369	0.0338175	0	0	0	0.0034548	0	0	0	0	0	0	0.0191903	0	0.0107511	0	0.0145593
PPY	0	0	0	0	0	0	0	0.131469	0	0.0481785	0	0.147232	0.03675	0	0	0.0217865	0.0275929	0	0	0	0	0.0998713	0	0	0	0	0.0405743	0	0	0	0	0.0525997	0.0579509	0	0	0	0	0.0118555	0.042124	0	0	0	0	0	0	0.0357763	0	0	0.0249809
PRKCA	1.97723	1.5677	1.04567	5.52062	4.01487	2.92793	1.61638	4.07244	3.38396	2.62663	1.43619	9.84857	2.40037	7.83347	4.1653	4.86291	3.13076	1.52619	1.5818	2.42843	7.45926	2.91025	7.24126	5.15734	1.71236	2.67931	4.57314	3.5963	3.83516	0.937254	4.04295	0.765797	1.36172	3.10178	2.08745	5.17542	2.9209	1.96737	1.56396	1.72695	5.72754	3.20003	10.371	1.78641	8.49189	4.35058	1.18202	4.28526	3.10855
PRKCB	0.156501	0.102547	0.493685	0.122768	0.807336	0.276756	0.315771	0.148673	0.0182519	0.06159	0.0429448	0.140439	0.202376	0.0530583	0.109805	0.859102	0.225211	0.191304	0.104547	0.136407	0.265047	0.599078	0.128903	0.23087	0.0753795	0.255551	0.0778034	0.920394	0.44014	0.246891	0.110667	0.70604	0.188056	0.182588	0.0678832	0.07073	1.31512	0.325266	0.710407	0.0532999	0.0907042	0.104124	0.0170309	0.0929086	0.38639	0.137206	0.243075	0.274088	1.57954
PRKCG	0	0.0042877	0	0	0.0101555	0	0	0	0.00541834	0.00703227	0.0067099	0.0128942	0	0	0	0	0.0161102	0	0	0.00493835	0	0	0	0.00535446	0	0	0.00592234	0.00601834	0.261324	0	0	0.0460656	0	0	0	0.00524931	0.0419799	0.00692186	0.00614854	0	0.0107707	0.00909138	0	0	0	0	0.0107702	0.0174358	0.0291702
PRKCQ	0.166853	0.101191	0.542736	0.123135	0.510607	0.437423	0.24047	0.0590711	0.0111195	0.101021	0.11016	0.0529231	0.25319	0.0258596	0.109666	0.293671	0.231429	0.260252	0.00860712	0.157085	0.0912676	0.635713	0.0747913	0.0824132	0.174508	0.184368	0.0729229	0.494034	0.139038	0.269971	1.17987	0.488435	0.138871	0.79952	0.224013	0.0592495	0.764591	0.298306	0.460558	0.0347911	0.0884149	0.121273	0.0103756	0.109345	0.0920553	0.241124	0.243129	0.0894544	1.59386
PRL	0	0	0	0.0220338	0	0	0	0	0	0	0	0	0	0	0	0	0	0	0	0	0	0	0.011292	0	0	0	0	0	0	0	0	0	0	0	0	0	0.0260143	0	0	0	0.0266979	0	0	0	0	0	0	0.0432188	0
PRLH	0	0	0	0	0	0	0	0	0	0.180122	0.0859324	0	0	0	0	0	0	0	0	0	0.0876244	0	0.116684	0	0	0	0	0	0	0	0	0	0	0	0	0	0	0	0	0	0	0	0	0	0	0	0	0	0
PRLHR	0	0	0	0	0	0	0	0	0	0.00873159	0	0	0	0	0	0	0	0	0	0.00613168	0	0	0.0339383	0	0	0	0.00367672	0.00373632	0	0	0	0	0	0	0	0	0	0	0	0	0	0.00564413	0	0	0	0.00324194	0	0.0108245	0
PRLR	1.33766	1.04844	1.19091	3.25923	2.09818	3.71053	1.85373	6.40977	2.86782	1.07018	0.612672	2.98884	2.6897	0.851554	0.356993	11.3898	7.94505	0.735268	0.746441	1.04959	0.421784	1.75781	0.588692	3.35883	0.895803	0.319267	1.37481	4.53592	5.10276	0.615618	2.28797	1.28522	3.09595	4.02305	0.508963	2.08512	2.6637	1.01321	0.672429	3.4166	1.95303	1.45858	2.15695	1.23528	5.44788	2.75717	1.78903	0.806514	2.62211
PROCR	2.51992	3.01119	0.304022	0.758042	1.5283	4.27688	11.3151	2.28619	1.72594	1.26994	2.171	3.96714	2.42174	0.379261	0.857801	0.925214	0.909154	2.94565	6.18544	1.00328	0.909525	4.31439	9.92925	1.82646	1.57154	3.75552	1.70823	1.93216	2.74315	3.95944	5.20625	5.75773	0.912276	0.594792	1.79013	1.7116	2.21114	5.51216	8.15799	0.708684	2.48536	0.387645	0.925706	3.56897	3.06987	0.602491	2.43121	93.1487	8.48697
PROK1	0.0880493	0.0758423	0.0556899	0.101079	0.153972	0	0.123373	0	0.109533	0.0888494	0.169553	0.065165	0.0542186	0.382096	0.36459	0	0	0.0696636	0.339138	0	0.553252	0.018418	0.0115115	0.175893	0.610696	0	0.119721	0.106454	0.122285	0	0.037735	0.213406	0	0.0342421	0.254613	0.185703	0	0.0174909	0	0.0856777	1.90517	0.0229731	0	0.0475196	0.0161927	0	0.0272153	0	0.0368552
PROK2	0.0121805	0.017986	0.023112	0	0	0	0.0819218	0	0.0113644	0.0147494	0.0140733	0.0270443	0	0	0.0560404	0.0400185	0	0.0346935	0	0.0207153	0	0.0458621	0.0382192	0	0	0	0.0124215	0	0	0	0	0	0	0.0142109	0	0.0220198	0.0440242	0	0.0386877	0	0	0	0.0212083	0	0.0134404	0.0219052	0.0451788	0.0365698	0.0458861
PSMB8	29.7461	75.3309	119.551	96.1253	164.986	39.8702	100.047	21.2654	34.9128	78.0368	35.1036	10.5692	50.4665	20.3249	15.0052	44.5716	99.7321	74.5679	21.5319	63.6068	74.5878	23.8939	62.7381	20.504	18.8279	27.8162	25.2339	46.2953	14.6326	19.7967	29.2969	75.3893	21.5988	13.0299	47.5797	23.4988	20.5896	26.8502	82.956	58.0803	31.5689	17.5448	9.14343	95.0654	65.1273	19.4159	82.3583	118.724	27.7904
PSMC1	2.03967	1.68709	0.290264	1.51466	3.01503	1.88003	1.69868	2.71693	1.1864	0.748671	0.59652	3.11345	0.105973	2.37878	2.07331	3.55305	0.477406	1.44331	3.0013	1.01356	3.61204	1.68795	2.05998	1.70427	0.201396	0.854559	2.07027	1.53906	2.8841	1.53151	1.03257	1.56734	1.91247	1.88142	1.20727	1.12923	1.67598	1.68275	1.81867	1.26527	1.2117	0.199565	1.32068	1.02167	2.92934	1.50163	1.25892	1.49904	2.39318
PSMC2	36.7892	30.5996	14.1002	17.1465	21.5739	23.0577	46.7317	30.5327	15.5958	14.388	18.499	30.5176	12.3436	25.4563	17.0155	31.1609	34.6547	28.3054	29.1861	22.8127	39.3153	29.6095	36.8516	30.2918	25.2423	12.6935	41.4617	27.2035	44.3221	15.9926	22.4762	35.4446	22.3746	23.9699	19.2659	44.9166	25.364	23.1647	26.8754	35.3069	31.4136	20.6165	35.0381	42.5672	55.1568	33.2203	28.2935	35.3903	25.4924
PSMC3	59.1207	61.6429	66.3939	79.7306	73.1821	43.6262	37.9609	60.7749	51.0464	69.9285	75.0956	37.9257	57.9145	48.603	50.7492	51.0844	67.224	70.1695	57.1446	62.6781	59.9157	96.1909	200.264	28.229	55.5272	78.0274	61.4955	61.4642	72.4779	31.3231	69.8111	65.8301	51.4803	44.2961	63.2772	55.2323	33.4879	51.8903	56.6835	53.6247	88.2078	59.3016	65.8144	83.4992	51.6992	69.0477	39.0539	45.3525	56.2454
PSMC4	34.5155	45.5186	39.5821	78.2579	62.9752	34.7249	32.0187	31.3662	29.7393	78.0916	85.2228	38.1406	33.1115	38.2577	25.0689	33.7908	83.2543	40.7202	35.81	44.347	46.9537	49.6272	41.987	28.7744	25.1666	29.0413	38.604	78.6557	103.668	28.4158	58.4636	52.166	31.3065	44.8851	30.7799	34.6929	39.2147	47.7223	23.6099	25.1013	43.0065	44.2977	51.4105	64.8597	73.693	119.758	37.1463	53.5666	32.3618
PSMC5	20.3784	37.7044	54.1174	24.967	45.3094	22.0851	20.7719	19.6518	20.9755	79.9915	34.4436	36.611	36.9589	20.5902	27.8295	27.6621	43.3079	18.5714	42.9891	21.2147	32.0099	46.1635	33.5044	35.9932	32.2517	45.3051	37.2329	27.5491	138.758	16.7835	57.6636	37.983	22.2803	21.6478	32.7647	26.3175	18.4056	24.2915	24.0291	21.4465	39.4654	25.7131	80.4934	42.2694	39.7513	32.771	12.5219	55.2174	22.6024
PSMC6	5.94141	5.80489	2.58435	10.9399	9.19658	6.50413	5.62155	6.02665	6.30724	4.12475	4.53602	5.43631	6.03568	6.21233	5.93796	6.8861	7.12341	7.53203	9.56341	6.47823	10.1349	8.38898	10.6408	4.12784	3.36529	4.17998	5.78062	5.45551	10.3087	4.99349	6.37022	4.01755	6.43301	8.52696	7.60008	5.20198	6.12733	6.79376	8.34085	5.02551	3.66982	9.81051	4.09412	5.00809	8.21809	7.2397	5.93761	6.2454	8.34723
PSMD1	17.5454	15.0724	11.3486	23.1215	22.2153	14.9747	12.2142	17.1174	13.2583	10.8177	8.62923	23.4632	17.2375	19.1663	11.9648	26.7806	22.8291	20.3132	8.27248	10.983	22.2275	16.3005	24.0315	15.0461	7.719	11.881	17.0896	24.9849	13.7531	12.4335	14.3769	22.9303	12.0747	11.2354	18.866	16.8241	18.5729	15.9967	13.7386	13.0321	19.1241	7.22967	16.9324	16.2824	25.6925	23.6191	11.5553	12.4409	22.5836
PSMD10	7.53779	7.69346	4.34836	23.5764	12.8602	7.60912	9.34448	9.20823	9.23792	12.6567	4.39146	20.6364	5.56106	11.8767	7.45034	15.2508	5.47121	13.6688	6.97766	7.23133	9.83075	9.37024	11.9197	11.9487	2.60912	3.48613	9.23406	12.7765	24.2865	6.92501	7.18637	22.601	14.2238	12.4741	19.211	13.5185	6.16163	8.42749	11.8186	20.9165	25.931	8.23762	9.6279	6.56755	41.5696	14.0656	9.7736	7.24794	9.52555
PSMD11	5.65597	10.6249	7.2909	14.7224	17.5923	8.43676	8.15733	9.97977	9.292	15.5998	5.78812	23.1621	10.4232	9.68051	8.8405	17.8358	11.2114	7.85034	8.00789	6.43745	14.6926	9.85045	13.2396	12.7328	7.30944	9.19051	11.6553	7.96681	37.5185	5.7318	16.409	12.9357	7.03451	7.25738	11.0442	13.6092	9.12221	9.25711	8.32683	9.02234	15.1632	9.40069	10.762	10.538	24.4223	10.2746	7.1058	20.0486	11.2425
PSMD13	17.3861	17.4283	29.7771	23.8535	31.6707	16.3215	13.8374	11.8409	34.4944	24.7188	18.2079	14.6873	35.8157	18.5894	14.247	13.2349	33.2272	20.3548	14.3141	17.0959	24.0937	34.6256	41.5188	12.2892	21.1469	23.5711	15.6886	25.3379	28.8245	13.7289	31.7002	22.9031	15.0103	18.4388	38.5909	19.3861	10.1233	22.7646	19.3142	20.5931	25.8433	25.7794	24.8394	27.4803	18.2526	22.5779	15.247	41.3861	21.5166
PSMD14	6.80772	7.07511	4.43807	13.6333	6.77526	5.35483	4.52888	5.15802	2.60822	7.8358	3.15626	7.43579	2.53972	5.69765	4.73865	7.36049	6.15582	9.63822	3.54045	5.1339	6.62011	5.23405	10.6884	5.51475	3.11361	3.46937	4.20081	9.29379	11.35	3.60289	7.16873	10.9827	4.37638	5.16605	4.25213	5.41798	5.33313	7.18683	5.55216	5.75318	8.43933	3.96103	6.92148	6.54974	13.245	6.65583	4.7256	15.9386	6.6749
PSMD2	32.1549	20.3374	22.8267	48.9503	27.3905	26.0374	18.3024	24.022	25.8648	23.0567	15.9881	43.3129	19.9753	31.1734	23.4648	34.0195	42.3971	23.6777	14.2348	17.7284	32.5039	24.9822	49.1107	18.9533	9.21831	19.3432	24.0553	36.1548	27.5927	15.8703	21.5735	53.7629	18.8281	25.2689	28.5819	37.9239	29.1716	21.8986	27.4139	24.996	32.3289	10.276	31.1564	29.7404	92.7306	25.9573	17.4291	39.9922	29.2591
PSMD3	15.0625	24.4961	12.0986	35.1762	59.8731	19.7915	17.6312	20.9252	25.3866	19.8198	15.8447	39.8483	11.6694	32.2145	19.1739	43.444	19.5698	20.8201	15.6999	18.9939	34.401	20.5178	37.333	27.0129	12.0834	27.3179	35.884	32.6987	22.6441	16.5505	30.1065	40.4848	17.3068	23.0095	37.0822	26.5969	18.6996	19.5369	35.2445	23.5478	35.6236	16.9851	32.1698	19.6781	63.3784	23.6203	19.5421	54.224	24.5369
PSMD4	47.0215	71.6072	71.3991	82.4627	174.991	54.7487	49.3636	66.8945	67.0803	144.612	80.8368	139.269	71.1904	136.052	50.7046	105.513	85.9943	71.7965	97.3549	46.0521	97.5293	163.897	138.448	77.922	123.883	63.2326	110.721	52.9035	149.553	31.2345	117.842	108.917	90.3313	86.1301	69.8056	52.505	55.7162	78.8559	84.2242	126.655	262.142	70.4424	139.857	143.329	147.703	154.059	81.4896	114.285	37.7947
PSMD5	4.35939	2.71486	0.907876	9.32072	3.89686	3.83151	2.48056	9.18593	2.65367	4.04494	3.23503	11.7284	2.39796	4.30171	5.29549	9.13112	4.81761	4.28614	2.74518	4.51696	7.2812	3.90333	5.09473	6.66625	3.09326	1.31993	5.3447	9.31087	5.72958	3.94255	5.19476	6.09122	2.665	7.23111	6.69378	5.61831	2.56198	2.05408	4.52162	4.6472	5.82556	3.72434	5.47682	3.54823	10.3099	4.62105	3.83695	6.4466	4.66753
PSMD6	3.80733	4.95301	5.26402	7.47483	5.5589	4.07892	4.3462	2.4962	3.11649	4.99864	3.16557	3.93918	3.90832	5.27468	4.02621	4.77536	5.61223	4.46075	4.55421	4.84627	6.72204	6.76115	5.57645	4.30212	3.11491	2.99158	4.36551	8.14768	4.72399	4.02564	5.27418	4.02614	5.03762	6.04401	5.0723	7.14742	3.44217	4.70083	5.43232	5.26921	6.58225	5.94004	6.08581	4.78328	12.6438	4.60211	3.38875	6.55436	5.4404
PSMD7	23.5978	12.5391	17.962	10.9906	26.2405	18.0857	12.6756	17.6525	9.48731	18.4308	9.52984	29.0742	5.52027	11.6616	10.458	21.6602	9.20397	17.4513	21.3635	13.1013	27.9536	10.0012	12.8559	21.9356	10.9014	7.11944	14.3379	14.2882	23.7903	13.1021	12.7145	13.699	6.12682	7.29878	19.5099	15.2347	17.1849	8.98104	18.6183	13.4998	24.2684	8.83997	20.8994	16.6997	19.7365	19.8529	22.4066	21.5793	11.4102
PSMD8	36.9555	37.0565	34.4248	47.2155	43.2929	31.3202	24.3489	38.2383	32.4734	73.503	40.8278	38.9199	29.2047	30.5155	29.5189	29.8899	69.8178	32.6249	36.1881	37.4799	44.5	50.7151	47.1594	29.1754	19.9612	36.8546	37.2223	57.7739	60.6309	39.4539	53.026	64.1383	24.3343	39.9211	47.9007	39.0512	33.1179	30.2918	23.6336	36.4155	43.8281	23.7093	52.5863	60.2093	61.3134	36.3973	40.7181	35.7183	33.7324
PSME1	97.5466	118.171	205.047	217.5	279.968	100.791	125.626	102.729	129.563	161.44	135.098	76.9263	159.671	131.555	47.9127	115.099	262.265	125.982	160.21	91.817	202.558	243.623	129.523	103.853	89.0229	104.375	86.7831	86.7047	84.4089	58.2595	70.5604	199.094	110.75	96.9827	151.271	146.866	83.8972	99.1367	137.487	133.539	115.873	63.4952	145.533	187.911	72.6251	67.2123	99.1624	126.452	87.4801
PSME2	40.7555	49.7591	164.607	82.393	166.579	50.2092	62.6649	32.467	41.0985	91.3873	66.8108	28.9175	117.11	62.4188	17.8505	38.4381	153.734	46.7402	70.2044	54.5225	86.577	96.6535	58.2511	49.8982	101.993	47.6941	44.9605	35.4471	38.6252	20.6832	32.5602	107.216	50.1796	36.0695	71.7579	56.0185	37.7718	46.9722	47.4148	76.0618	74.9769	43.0778	67.7599	94.3067	36.5392	47.1753	32.8052	66.6525	28.8481
PSME3	5.29367	13.3431	6.63849	22.631	10.2501	10.5596	9.06104	16.6733	13.416	13.3279	5.47779	23.6283	6.76585	19.8837	9.26517	25.4892	9.82166	9.25223	5.19648	10.8761	13.7306	13.3022	21.0796	13.4476	4.99299	8.4374	16.3701	28.9817	50.902	7.57862	18.3161	15.6342	11.3074	12.3744	8.66226	17.09	9.10504	10.3682	13.8561	7.83232	12.8643	7.64272	12.7175	10.8643	30.4845	14.9552	8.8208	23.3079	16.2715
PSPN	0.396616	0.541171	0.542987	0.718502	0.807693	0.569542	0.557135	0.290308	0.613613	0.790308	0.997704	0.386424	0.435898	0.822444	0.508161	0.615793	0.194978	0.462355	0.456842	1.66069	1.25394	1.50594	0.303242	0.472143	0.502971	1.05279	0.476138	0.567101	0.317949	0.389913	1.53624	1.26106	0.329058	0.83174	0.580707	0.912128	0.371982	0.532562	0.324234	0.273573	0.819381	0.392968	1.11016	0.87246	0.437639	0.835154	0.502777	0.326581	0.485431
PTAFR	1.0097	0.816326	1.42503	2.02128	1.58327	1.71512	0.666463	0.255052	0.381492	0.217249	0.2796	0.32732	1.03283	0.176535	0.268746	1.53986	0.92594	0.693231	0.596618	0.447039	0.796328	1.69664	1.59718	0.427004	0.218647	0.941871	0.136156	1.76413	0.410262	0.492817	1.57712	5.17945	0.455782	0.550064	0.754072	0.543073	1.84731	1.02692	1.3473	0.430355	0.263098	0.365772	0.207044	0.558441	2.95569	0.296386	0.742829	1.49485	1.38317
PTGDR	0.0841592	0.0238983	0.0859861	0.104045	0.0339621	0.138243	0.108851	0.0534782	0.0181201	0.0235174	0.0822775	0.00479123	0.0358776	0.0280934	0.0416987	0.0850772	0.0718344	0.0245855	0.00935062	0.0495447	0.167795	0.121876	0.0710955	0.0537194	0.0698462	0.0816014	0.0396111	0.127469	0.0323676	0.0942724	0.0332934	0.0256755	0.047146	0.18127	0.187203	0.0819225	0.105292	0.0617285	0.10281	0.0629941	0	0.131749	0.0112719	0.0419263	0.0428603	0.0407482	0.132066	0.090703	0.560921
PTGDS	0.0743124	2.50553	7.72392	0.0568729	7.21945	207.496	0.360966	0.4911	0.200296	0.529913	1.83168	0.116108	12.889	0.1702	0.0227932	1.02181	0.183241	18.5165	0.0954094	0.77936	0.0972785	102.604	1.16586	0.114193	0.419971	14.7885	0.412594	17.1478	2.73843	11.0085	59.1732	43.2596	0.180396	0.250466	1.55198	19.3003	16.0258	293.254	85.7055	0.289243	0.949447	0.374853	0.04313	6.87147	39.2409	3.45985	9.24899	2.06583	158.461
PTGER1	0	0.0714124	0.0786556	0	0.0724892	0.516367	0.0929331	0.251118	0.0515676	0	0.159649	0.14317	0.102103	0.119926	0.0508584	0.166457	0	0.131189	0	0.693242	0.358144	0.624318	0.0325173	0	0.0212972	0.981691	0.0704554	0.357988	0.0230286	0.156501	0.213185	0.0548021	0.0201258	0.0483631	0	0.399672	0.0749124	0.667005	0.365732	0.295802	0.717555	0.108156	0	0.149147	0.365926	0.0248496	0.94815	0.967988	0.850211
PTGER2	0.174674	0.070344	0.331437	0.115453	0.277685	0.540432	0.307049	0.0918233	0.0222233	0.0576857	0.0733883	0.0470094	0.249344	0.0689102	0.1242	0.278247	0.154177	0.203531	0.0573402	0.236304	0.346104	0.54807	0.155705	0.0878453	0.14685	0.172865	0.0323872	0.411403	0.105859	0.26978	0.0612487	0.3044	0.335368	0.259371	0.114797	0.0717668	0.760463	0.264973	0.975104	0.108162	0.0441762	0.149153	0.0207366	0.119981	0.157697	0.192762	0.309218	0.063567	1.69492
PTGER3	0.0427157	0.106627	0.00771916	0.0108971	0.064026	0.17646	0.0855032	0.033606	0.0910941	0.0541877	0.0258518	0.0331192	0.0225457	0.00220676	0.0524074	0.0155934	0.0253919	0.102354	0.0910778	0.00691871	0.0119822	0.242526	0.0462724	0.204421	0.479674	0.0326319	0.0684526	0.0274033	0.0271199	0.125065	0.0156913	0.024202	0.0148134	0.0142389	0.0205869	0.0937682	0.147036	0.116372	0.13352	0.0197929	0.0829949	0.00318429	0.0159375	0.054889	0.00897789	0.0128032	0.0264061	0.0101783	0.247762
PTGER4	0.337081	0.186653	0.67722	0.193482	1.17024	1.11147	0.39174	0.352162	0.083249	0.114048	0.171821	0.520958	0.27472	0.145203	0.27368	0.966317	0.330028	0.498876	0.336516	0.26556	0.309528	1.1883	0.793254	0.306218	0.160447	0.35218	0.217371	1.00687	1.51185	0.537383	0.280426	1.1534	0.274364	0.39327	0.229351	0.20163	1.12874	0.676501	1.13886	0.250825	0.202259	0.209524	0.0302088	0.272881	15.7694	0.401163	0.478044	0.644918	2.90072
PTGFR	0.129123	0.292149	0	2.46732	0.00728378	0.305751	0.0210105	0.0275264	7.83063	0.17653	1.57369	0.00924806	2.00059	0.0271131	0.889191	0.0547389	0.0173319	0.245185	0.0300811	2.9327	0	0.172513	5.78976	0.0153614	0.0256796	0.300696	0.118934	2.67192	0.458158	0.633509	0.0321316	0.379953	0.0667345	0.0485956	0.10238	9.52154	0.0376363	2.37801	0.136707	0.0162122	0.0463503	0.104329	0	0.391144	1.58564	0.0561804	0.131319	2.30516	0.25629
PTH	0	0	0	0	0	0	0	0	0	0	0	0	0	0	0	0	0	0	0	0	0	0	0	0	0	0	0	0	0	0	0	0	0	0	0	0	0	0.0122785	0	0	0	0	0	0	0	0	0	0	0
PTH1R	0.0284771	0.268068	0.0810512	0.272427	0.24899	1.1117	0.670345	0.517532	0.179341	0.22414	2.37719	0.210758	0.802251	0	0.176875	0.0779668	0.167869	0.980089	0.812355	0.151347	0.276789	2.64481	0.413261	0.242867	0.263351	1.76213	0.392047	0.213957	0.569519	1.67028	5.14413	0.320004	0.228127	0.16612	0.463205	0.43115	0.849134	1.75224	1.86928	0.166261	0.726205	0.167175	0.2975	0.783814	0.298515	0.12163	2.60101	2.76442	6.0791
PTH2	0	0	0	0	0	0	0	0	0	0	0	0	0	0	0	0	0	0	0	0	0	0	0.0335563	0	0	0	0	0	0.0712932	0	0	0	0	0	0	0	0	0	0	0	0	0	0	0	0	0	0	0.171243	0
PTH2R	5.01386	2.71112	1.62944	0.0273842	0.00782135	3.59954	1.5868	0.00738949	0.00417298	0.0108319	1.31259	0.0033102	0.0330499	0.00485236	0	0.00979647	0	0.0382182	1.07886	0	0	0.00561349	0.0175425	0.00412379	1.29602	0.205009	6.07088	0.00927017	0.0149082	1.39671	0	0.0236519	0.0130291	0	0.633748	6.08847	0.0242484	3.0493	0.00947071	1.42752	0	2.11455	3.57453	0	0	0	0	0.076094	1.12329
PTHLH	0	0.0686845	0.0441297	0.0400485	0.0508376	0.10088	0.068434	0.0288184	0.00542475	0.035203	0.0403071	0.0301222	0.0322229	0	0	0.0254702	0.0161292	0.0386419	0.0755831	12.1924	0.150702	0.0510816	0.369437	0.0321648	0.0627313	0.0199879	0.00592935	2.41019	0.377915	0.206969	0.343872	0.184481	0.982369	3.07972	0.210167	0.0367887	0.0210148	0.242552	0.0984932	0.0339463	0.043134	2.1208	0.0101237	0.0188277	0.153977	12.7829	0.0431319	0.0523694	0.525686
PTK2B	1.53209	3.81925	1.4324	2.52314	1.36772	1.53937	1.65218	2.35131	1.65112	1.59147	1.47562	2.7404	1.75577	0.988161	5.10616	4.08218	0.556151	1.90579	1.62305	1.11338	1.65047	1.73028	1.30472	1.85074	0.946088	1.02104	1.81985	2.35722	1.80675	1.85821	0.636448	6.08619	3.12197	4.07163	0.776564	5.83245	3.80196	1.90131	1.27093	1.49805	0.656432	1.31352	0.463278	0.969787	1.48026	1.58907	2.57969	1.0775	3.70168
PTN	0.0802364	0.287734	0	0.298261	0.360796	0.871992	0.539641	1.83693	0.096249	0.138798	1.15219	0.729559	0.952861	0.0746124	0.453532	0.0502119	0	0.533249	1.80461	0.155952	0	1.56808	0.602427	0.380458	0.176669	1.3266	0.677967	0.487022	9.68527	1.03859	1.17897	4.54605	0.250427	0.13373	0.596623	0.155411	0.559284	0.348378	1.58976	0.691524	2.69984	0.0179439	0.109768	0.346424	1.85924	0.381353	1.12665	2.30571	4.11655
PTPN11	13.9797	15.4002	2.71596	16.3115	6.55206	8.9225	10.9765	10.6927	7.19055	7.02816	4.95165	15.0178	2.6442	16.0982	15.3997	19.6037	3.53858	6.67498	3.25115	6.94258	10.5645	5.60074	12.6305	17.7024	3.17514	4.34493	13.1744	22.8959	18.1954	6.54378	8.19839	4.89773	9.89675	10.0722	7.06892	23.3189	16.5448	9.16577	4.37693	6.7729	4.49213	9.20469	6.43341	4.61379	23.4466	10.9376	6.79771	8.6145	20.0816
PTPN6	7.91436	3.85788	9.87012	5.81403	9.09633	5.64502	5.84625	6.34032	5.62492	7.139	5.33978	4.91452	4.91692	4.33352	3.46993	6.72701	5.11083	5.19921	2.88757	6.91662	4.56283	10.2971	8.2685	4.96227	4.34405	5.30938	4.68905	11.8944	10.7859	4.77593	7.28765	16.4019	6.45171	6.45302	3.96169	4.91797	8.38031	8.25102	8.11774	2.18944	2.98801	8.52366	6.36114	4.74733	7.92412	6.39747	5.51772	12.0357	10.081
PTPRC	1.5176	0.659808	0.858979	3.01224	2.43644	1.99102	1.89308	0.713049	0.0831606	0.357877	0.208677	0.786394	0.285984	0.473318	0.742468	3.69647	0.257019	0.78612	0.24732	1.06909	1.01142	1.8517	1.40021	1.13755	0.144611	0.626262	0.236808	4.58687	0.953836	1.15754	0.41014	2.37222	0.778942	1.1521	0.715583	0.667853	6.54056	1.2343	3.03218	0.27389	0.265365	0.528762	0.159279	0.291157	2.01621	1.02293	1.37026	0.997648	9.11903
PYY	0.0332515	0.0490998	0	0.419893	0.0581469	0.0221894	0.0838641	0.0549363	0.0930706	0.120793	0.0768371	0.196874	0	0.144297	0.168283	0.0728307	0.0461206	0.0315698	0.12007	0.0989636	0.039175	0.0625992	0.0521671	0	0.0256252	0.0762057	0.0508639	0.034459	0.360209	0.0538015	0.0427514	0.0659389	0.0726472	0.174574	0.336537	0.0150279	0.0300453	0.0495402	0.0176022	0.0647117	0.370018	0.130135	0.0868444	0.0358911	0.0366907	0.179397	0.0308333	0.183024	0.0208773
QRFP	0.0355277	0.034974	0.0449415	0.308155	0.144964	0.14225	0.0398245	0.0195657	0.0441964	0.0573609	0.0136828	0.0438233	0.0218771	0.0128479	0.0108971	0.0389082	0.0821297	0	0.0342104	0.0604218	0.0139522	0.0297265	0.65957	0.0436754	0.0182529	0.0814224	0.0483074	0.0613631	0.0789472	0.0191615	0.060904	0.156562	0.103494	0.0138166	0.102736	0.074931	0	0.0282302	0.0376144	0.184378	0	0	0.0515497	0.0383481	0.378957	0.202326	0.065888	0.165924	0.059484
RABEP1	2.48331	2.15087	2.28183	2.90832	5.19426	6.13511	5.18648	7.54993	3.30989	3.40751	4.35244	7.10235	9.04168	4.07707	3.19244	4.22097	2.56038	3.95903	3.7866	4.72443	3.82891	13.1725	5.8369	5.21399	2.17789	1.87756	2.86355	5.28407	6.59883	5.10282	3.37833	2.26153	3.15283	10.2597	2.71244	5.92685	5.61238	7.86364	3.53632	4.29456	2.76005	4.10404	6.52765	4.26081	8.73137	3.6279	5.12953	4.19119	8.54338
RABEP2	2.07273	2.07958	2.53762	2.7316	3.97049	3.58132	1.74978	0.795722	3.52666	2.42135	2.81714	2.33285	2.00983	1.65152	1.87559	1.62946	2.36197	2.40476	2.52176	4.33321	1.83401	2.97921	4.83052	2.43441	0.974314	2.83834	1.41208	4.05089	4.62258	1.82297	4.40096	7.74304	1.37169	2.78448	3.03416	1.93183	2.40909	3.40586	2.64064	1.99179	4.10736	2.32924	4.56735	2.87317	6.11636	3.75849	3.07039	5.39669	3.89336
RAC1	46.8112	51.9489	66.5688	45.8678	43.2008	46.4111	42.4184	41.0759	52.2285	43.7041	44.3232	53.0966	87.5706	72.258	36.6745	47.8817	125.851	53.1781	38.5152	38.074	58.5007	79.0815	61.2978	54.9673	117.759	51.7696	35.8029	68.5586	57.9546	43.7472	132.06	93.4703	44.7993	60.3965	53.2869	60.8867	33.3071	47.2904	51.4832	73.8108	80.0939	79.6087	59.2192	44.858	124.575	62.6735	58.3163	100.055	62.5825
RAC2	3.28801	1.77487	20.3351	5.1752	18.2663	6.30302	5.35899	1.51181	0.607752	4.4322	2.26682	1.07898	5.22882	2.07802	1.18452	6.15713	4.59282	4.24083	1.50091	5.16987	2.43023	15.9325	20.9805	2.24506	1.70919	5.61605	1.20204	18.3711	3.42486	3.93986	5.86251	31.3095	4.13395	4.00799	3.74488	1.36684	15.7097	7.74086	12.2907	2.06757	2.5169	3.98185	0.722371	2.68688	15.2825	4.86018	5.47937	26.4175	16.4569
RAC3	15.0188	12.2183	31.6937	42.3356	7.15046	6.48705	5.12406	1.69954	21.3786	18.996	21.661	2.57899	9.92914	17.0331	17.6415	10.308	30.0165	10.3404	14.6724	3.13812	12.7253	6.27781	9.64285	5.08604	13.3777	17.21	10.3067	6.66274	25.5231	2.97517	20.4999	11.2195	2.07889	3.64547	23.0907	19.933	7.18035	6.85072	1.68811	14.8895	12.0432	3.18048	18.7842	9.35466	7.81788	26.8708	4.65013	14.0009	3.90752
RAET1E	0.045754	0.0144774	0.0248046	0.0650306	0	0.0523415	0.0329705	0.0539945	0.03659	0.0316593	0.00755198	0.164474	0.0603733	0.0141823	0.0421012	0.0429492	0.00906598	0.0186171	0.0377636	0.0444649	0.0847074	0.00820347	0.0769092	0.0421851	0	0.0374496	0.079987	0.0474155	0.0435734	0.0423033	0	0.164181	0.0476012	0	0.0283515	0.0059081	0	0.0194764	0.0207605	0.0254409	0	0	0.0284518	0.0141103	0.0649111	0.0293868	0.0121219	0.313984	0.0656621
RAET1G	0.145347	0.0487776	0	0.171911	0.138637	0.03527	0.111085	0	0.0739679	0.0640003	0.122133	0.166245	0.122047	0.0716751	0.182377	0.188117	0.183272	0.0627253	0.152681	0.146067	0.0622687	0.132669	0.134745	0.0852787	0.122194	0.0605645	0.107798	0.0684657	0.198191	0.0855176	0.135907	0.768607	0.0962274	0.0462476	0.0955226	0.179151	0	0.055121	0.0979256	0.102859	0.220554	0.020685	0.103529	0.142623	0.24786	0.0237626	0.098019	0.885976	0.0995537
RAET1L	0	0	0	0	0	0	0	0	0	0	0	0	0	0	0	0.0639027	0.0202334	0	0	0.0124046	0	0	0	0	0	0	0	0	0.0729352	0	0	0.231423	0	0	0	0.0131857	0	0.0260804	0	0	0	0	0	0	0.032193	0	0	0	0
RAF1	10.1866	10.5728	11.2809	27.4631	9.73582	10.7167	8.23785	9.96306	19.2929	12.4259	8.97096	9.87799	5.68097	11.8033	16.009	12.0546	12.3902	9.74029	5.7863	10.1494	11.0844	10.2944	20.2113	18.0711	7.14257	7.65857	13.3404	26.3225	14.4539	6.77745	11.691	6.87404	13.6306	21.2235	12.1451	21.075	13.5612	10.7515	8.55954	14.3266	9.73628	16.3463	12.0596	8.7076	24.6644	15.1019	11.1094	11.6544	16.6657
RARA	6.5118	6.62479	1.2285	11.0726	6.81489	6.70789	4.35448	20.4678	17.2971	17.7856	30.1187	8.60665	4.74583	33.5084	25.1019	14.2128	4.41527	19.3552	7.69107	16.3895	9.07026	9.27702	17.4176	6.91076	5.71876	9.89208	12.8326	11.9955	7.04827	4.69395	11.0242	28.1362	16.1582	12.5798	15.2058	10.3652	8.90275	7.12324	12.8526	6.01736	30.0118	20.8688	6.26883	4.28713	16.6558	16.3756	6.28837	37.153	13.9827
RARB	0.637327	1.64691	0.917053	0.239815	0.315773	0.77263	1.04482	0.175493	0.72346	0.115761	0.104318	0.487407	0.176603	0.0633812	0.317659	0.616539	0.184164	0.312632	0.567669	0.293556	0.657005	0.606582	2.49554	0.264427	0.196462	0.480789	0.861164	0.225661	1.07102	0.567164	0.573588	0.463409	0.278484	0.235462	0.714148	0.542471	0.422308	0.911551	0.624152	1.46771	0.512206	0.157972	0.138711	0.510209	3.57484	0.214905	0.453083	1.71148	1.2138
RARG	0.356164	0.60509	0.312469	0.633089	1.56711	1.33405	0.547344	1.15789	0.550261	0.449831	0.455759	1.06289	0.438635	0.436258	0.405258	0.847212	0.38777	0.694483	1.16716	0.400561	0.645211	1.6871	1.97974	0.762696	0.4309	0.456402	1.11697	0.837416	1.7233	0.650639	1.59533	1.8328	0.418356	0.621067	0.87488	0.796182	1.21808	1.7026	1.76783	1.03599	1.5413	0.131897	1.30029	0.537387	3.60042	0.568203	0.802573	5.84484	2.45263
RASGRP1	0.15136	0.0808411	0.158876	0.155274	0.444895	0.300868	0.22201	0.127695	0.0210326	0.0935914	0.0855801	0.0834201	0.113035	0.104815	0.0503767	0.48318	0.18314	0.128418	0.0279092	0.117755	0.0493237	0.497149	0.0783127	0.130646	0.0645274	0.147612	0.0295573	0.687501	0.155648	0.114636	0.107653	0.336342	0.121956	0.135261	0.107094	0.0756841	0.779857	0.247578	0.412559	0.0626739	0.0298638	0.13612	0.0056073	0.0556174	0.209658	0.141894	0.215008	0.0290063	1.14849
RASGRP3	0.51039	1.29477	0.237922	3.02082	0.395302	4.04469	0.697824	1.00955	2.55232	0.290839	0.361167	0.484916	0.75037	0.160942	0.51677	0.49126	0.585445	0.456073	0.811173	0.473054	0.634603	0.620625	2.26089	1.0242	0.468187	0.560571	0.507879	0.955357	0.718165	0.431484	0.640313	0.840516	1.53823	0.500687	0.686879	0.960987	1.0181	1.29981	1.34998	0.154664	0.678008	0.50594	0.416661	1.44494	1.92729	0.187386	1.06445	0.231532	1.15097
REG1A	0.0113826	0.0420195	0	0.165516	2.64733	0.197492	0.229666	0	0.0849595	0.0137833	0.249877	0.0673938	0	0.148187	0	19.0351	2.85762	0.81052	0.0822042	0.135508	34.2634	0.0285719	10.3932	3.13793	2.26317	0	0.185724	0	1.17615	0.0552518	0	0.0300962	0	0.1328	0.0329151	0.030866	0.164561	18.2813	41.2872	61.5826	7.70539	0	0	0	261.46	0	0.0844384	1501.43	0.100054
RELA	12.0886	7.08386	7.63677	17.8983	11.4997	10.8583	11.6916	6.44167	14.333	13.2979	10.3051	8.76322	11.2521	22.0309	11.5071	18.5674	15.5012	9.12992	10.2459	7.52018	15.7408	16.8588	16.3495	12.2026	10.5457	8.47446	14.7904	23.6214	16.9906	6.95982	21.5393	11.1927	14.8542	19.621	12.0696	10.4298	12.5595	8.85743	11.1931	13.2316	18.7078	13.2932	14.0436	9.75516	14.3778	20.0177	9.5567	8.85048	17.4948
RELB	11.3864	6.69667	5.47493	5.43153	3.1564	7.55517	5.43896	3.02487	11.9997	3.57229	6.42089	4.89341	9.41764	9.88238	3.23845	7.67316	9.50281	5.62023	2.15857	4.20852	3.36131	22.0531	12.3929	5.23121	1.41595	8.82938	2.18377	11.411	3.49339	3.82075	11.8114	6.85085	5.39938	9.06507	9.11077	4.8127	5.50666	8.35099	9.04818	3.26095	3.67159	4.43599	7.76687	18.6938	19.1673	10.477	9.27449	7.71115	15.1268
RETN	0	0	0	0	0.13206	0.806327	0.126979	0	0	0	0	0	0.209263	0	0.0347451	0.248114	0.0523735	0.0358499	0.218157	0.0321088	0	1.46912	0.562778	0.0348143	0	0.0865374	0.0385066	0.156523	0.37758	0.183287	0	0.349434	0.164993	0	0	0.0341306	0	0.765092	0.679615	0	0	0	0.0657456	0	0.0833303	0.0339531	0.0700271	7.17986	0.142247
RETNLB	0.142025	0	0	0.366845	0	0	0.0298504	0	0	0	0	0.0131391	0	0	0	0	0	0.0168553	0	0	0	0	0	0	0	0	0	0.0183978	0	0	0	0.0704103	0.0775736	0	0.436364	0	0	0.0105799	0	0	0	0	0	0	0	0.0159635	0	0	0
RFX5	6.34091	4.22004	3.51768	8.38187	8.71495	8.71998	9.07791	10.1437	6.30753	4.96675	3.68044	3.11803	4.02586	6.54012	5.81105	18.9525	2.28041	6.30071	3.72285	5.13348	4.60034	6.45904	23.6308	6.16607	1.35281	2.70821	3.76367	8.19068	11.0244	3.21439	6.40751	4.10369	2.84366	4.57061	5.45377	17.1055	6.5458	6.57789	4.88201	6.48258	6.67016	4.26953	3.36584	6.33593	12.6376	11.234	9.66331	6.59433	8.16136
RFXANK	6.25998	11.1896	23.9049	13.5922	19.1089	5.49659	7.53147	7.81512	17.2289	15.132	15.2903	8.60412	11.97	11.1062	7.51426	6.28002	10.1734	8.40862	9.15511	13.7415	11.7928	22.4772	17.6792	5.81509	13.3604	16.6658	9.99971	16.5841	20.565	6.01633	30.7818	31.9937	10.3861	18.6888	10.9678	8.53007	5.85485	8.41959	11.37	10.3813	19.1027	7.18406	17.8178	15.5375	33.4034	16.5623	11.5367	30.4683	9.23004
RFXAP	0.255442	0.264034	0.306971	1.85069	1.04228	0.556841	0.572671	0.126608	0.897698	0.1959	0.708328	1.55023	0.251672	1.01613	1.73936	0.792618	0.248013	0.291028	0.233672	0.825416	1.3342	0.619821	1.24902	0.722254	0.288723	0.26344	0.920417	1.26182	0.752104	0.344425	0.591159	1.29452	1.07897	1.3709	0.381643	0.838909	0.246199	0.243568	0.315519	0.397699	0.426379	0.466534	0.941423	0.193004	1.20262	1.27096	0.536894	1.42306	0.759143
RHOA	99.3613	96.8619	152.229	170.064	139.311	98.9055	90.7707	95.3974	96.5351	80.9787	47.5337	126.886	101.554	201.411	105.179	129.869	116.689	103.441	85.2022	93.8422	117.492	138.668	131.994	82.4541	72.8454	83.5941	98.1938	172.824	74.585	75.2902	117.58	109.834	91.7664	88.2871	86.5643	182.655	117.101	78.5064	131.154	134.527	169.711	66.2378	156.076	95.4456	267.324	89.4337	79.8797	249.052	134.329
RLN1	0.0178176	0	0	0.0272724	0.0311576	0.0475601	0.0299587	0	0	0	0	0.0131867	0	0	0	0	0.0247134	0	0	0	0	0.111811	0	0.0164278	0	0.0204172	0	0.0553939	0	0	0	0.0942212	0	0	0	0.0161052	0.0321992	0.031855	0.0188641	0	0	0	0.0155117	0.0192321	0	0	0	0	0.134244
RLN2	0	0	0.0291522	0.0117583	0.0268668	0	0.0258329	0.0253833	0	0	0	0	0.028382	0.0333362	0	0	0.02131	0.0291737	0.0221913	0.0130646	0.0181008	0.115696	0	0	0	0	0	0.0159218	0	0.024859	0.355559	0.0609342	0	0.0179249	0	0.0138873	0.0277649	0.0366241	0.0162662	0	0	0	0	0	0.0339059	0.013815	0	0.0153757	0.077171
RLN3	0.0283743	0	0	1.36807	0	0.0378694	0	0	0.0794193	0.171793	0	0	0	0	0.052218	0	0	0	0	0.458432	0	0	0.333866	0	0	0	0	0	0	0	0	3.2635	0	0	0	0	0	0.0338191	0	0	0	0	0	0	0	0	0	0.908678	0
RNASE2	0.286073	0.0960047	0	2.76657	0.227389	0.104128	0	0	0.0242641	2.26739	0.0600958	0.0577422	1.29715	0	0	0.0854434	0.144287	0.172839	0.075127	44.4947	0	0.13056	0.102002	0.0479561	0	0.0596019	0.0530422	0.053902	0.476768	0.168317	0.133747	0.515721	0.0757584	1.4564	0.488822	0.16455	0.046998	0.340968	0.0550681	0.0506123	7.28318	0.0407125	0	0.112285	2.84096	1.94095	0.0964611	2.42048	0.130628
ROBO1	3.70853	4.31236	7.44445	1.2298	7.15762	3.74711	15.5464	1.1037	0.154978	0.430703	3.04777	3.05201	1.29413	23.8659	0.717713	18.7212	8.97289	0.642826	0.748455	3.86746	3.78208	4.47091	13.0088	8.04542	0.631704	0.17586	3.1301	23.6598	11.0583	2.57664	1.90351	0.687438	8.87023	13.3846	4.2212	2.01062	2.07191	10.9557	0.77227	7.1962	1.28251	6.26065	11.0454	4.39855	19.8649	24.2941	7.38327	7.82754	17.3715
ROBO2	0.00707015	0.00608996	0.00223588	0.000901823	0	0.0141542	0.267476	0.0253087	0.00109941	0.00142688	0.00953028	0.0043605	0.0108841	0	0.0216857	0.00129048	0.364474	0	0.022126	0.00300604	0.00416483	0.134582	0.00647041	0.0184696	0.0018162	0	0.00360501	0.192942	0.20424	0.00381321	0.0454504	0.00311564	0.708834	2.02093	0.0051112	0.00319533	0.266185	0.126403	0.0436649	0.00229324	0.581326	0.00184468	0.00205172	0.0012719	0.540899	1.12103	0.013112	0.00117927	0.124294
ROBO3	0.271078	0.354887	1.49535	0.194629	3.14231	2.41319	1.03376	0.226239	1.64264	0.125209	0.180818	0.794223	0.464632	0.127338	0.0385727	0.263205	0.395373	0.705773	0.387504	0.0689155	1.11285	1.30477	2.49252	0.358152	0.753784	1.34179	0.555731	0.0376493	2.40327	0.633044	2.45764	0.679798	0.19538	0.221711	1.82231	1.2807	0.227264	1.01592	0.2367	0.424218	0.399093	2.26182	1.73469	0.844612	0.345371	0.123132	0.373159	0.665633	1.74762
RORA	1.21912	0.994522	0.20115	0.86776	1.00549	0.871983	2.19903	2.95652	0.911669	1.53484	0.884015	6.06344	0.659883	1.42887	7.48675	3.22423	0.500253	1.63008	1.58779	1.05431	3.21606	0.954491	0.564933	2.59546	1.22013	1.37586	1.65099	0.668714	1.82822	3.71393	0.918527	0.96276	0.64448	1.18304	0.576449	2.52575	2.06779	0.409961	0.746619	1.06967	1.62632	1.50623	0.790491	0.737552	0.425943	0.842372	0.726572	0.219104	1.79133
RORB	0.00204723	0.00906895	0	0.0109675	0	0.00819695	0.00344224	0	0	0.002479	0.00473072	0	0	0.00222103	0.00376758	0	0.00567912	0.0310991	0	0.00174086	0	0.00256941	0.00481775	0.00188754	0	0	0.00208773	0.00424315	0.0102357	0.0198748	0	0.00270649	0	0	0	0	0.022198	0.00976032	0.0455169	0	0	0	0	0.00220975	0.912628	0.0036817	0.0341702	0	0.123396
RORC	3.89229	28.0205	1.50636	68.6365	20.3294	8.97401	14.0997	47.1331	73.7244	24.5467	38.402	55.0824	2.28	40.1663	48.2252	50.768	8.59958	8.54131	23.653	2.8069	38.0107	55.6278	17.8681	16.0646	32.9533	13.5057	79.1759	4.53992	13.3862	17.8013	3.85964	13.8139	23.6412	26.7029	7.14728	23.8866	13.5103	6.10641	27.7982	23.8443	42.5736	12.6645	14.3321	8.38521	11.4695	5.90158	36.5989	7.83883	10.6067
RXFP1	0.0172722	0.0382566	0	0.0343687	0.07853	0.0599355	0.0929331	0.0342434	0.0483446	0.0376469	0.0199562	0.0255661	0.0446703	0	0.063573	0.0189156	0.0191655	0.036077	0.119749	0.00293747	0	0.0303488	0.0298075	0.0955495	0.00532431	0.00791686	0.0598871	0.0429585	0.0748429	0.050304	0.124358	0.0365348	0.0100629	0.00806052	0.769168	0.0312244	0.0312135	0.00411731	0.00731464	0.0201683	0.0384404	0.0378546	0.0270663	0.022372	0.171528	0.0248496	0.0192193	0.0207426	0.0173512
RXFP2	0	0	0	0.00452759	0	0	0	0	0	0	0	0	0	0	0	0	0	0	0	0	0	0	0	0	0	0	0	0	0	0	0	0	0	0	0	0	0	0	0	0	0	0	0	0	0	0	0	0	0
RXFP3	0.010602	0	0	0	0	0	0	0	0	0	0	0.00784654	0	0.0115021	0	0	0	0	0	0	0	0	0	0.00977508	0	0	0	0	0.26504	0	0	0	0	0	0	0	0	0	0	0	0	0	0	0	0.0116986	0	0	0	0
RXRA	21.0367	18.7168	11.3141	44.5546	12.1639	17.9397	18.8672	12.4492	36.3694	10.6876	24.1589	23.4868	18.6493	23.6598	35.8241	28.5663	34.7064	15.751	5.48903	19.6625	17.9561	22.1434	28.9616	17.7569	10.6708	23.9541	18.8884	27.0711	7.31394	13.4406	13.6985	25.7851	24.8725	23.3274	15.2185	22.6289	9.81423	5.7425	10.7382	19.4206	12.6954	5.50293	6.58843	15.7669	17.9053	26.2761	20.3453	6.31625	17.1138
RXRB	5.75025	7.22617	6.22526	11.9067	25.1649	6.30406	7.53775	10.634	19.9597	8.25492	5.31273	17.7273	8.19827	11.3845	10.5547	10.5816	9.35134	5.71624	8.71794	8.56977	22.6194	12.2839	13.1234	10.0215	10.1521	6.61216	24.5542	12.0635	5.83515	10.6413	13.4209	8.2443	7.8063	14.5103	9.40758	15.7694	10.5907	7.27756	9.73122	15.7918	10.0515	13.9889	23.2642	11.9972	9.39039	14.9307	11.1472	12.8378	10.6172
RXRG	0.00728301	0.0322627	0.0276384	1.3433	0.725941	0.194404	0.110212	0	0	0.0881903	0	0.291067	0.0134541	16.5137	0.0201047	22.253	0.444475	0.248928	0.178831	0	0.0171609	0.0182813	0.0571304	5.08991	5.21976	0.0667648	6.04565	0.0301899	0.230619	0.0589202	0.0749101	2.09897	0.243981	0.0679762	4.55956	0.743886	0.723884	0.451389	0.185058	0.949637	6.11884	0.0114013	0	0.047167	0.0883994	1.17224	1.45872	0.00728863	0.2012
S100A6	23.5782	25.5148	50.187	14.5009	48.7277	93.7574	22.5083	7.81764	10.5464	16.8465	17.2891	12.6611	79.6794	13.3603	4.31683	10.6298	96.8484	33.8282	74.4206	27.1685	4.24062	125.779	39.8304	44.1493	71.2483	61.6367	15.6723	24.8535	117.92	36.4813	260.506	262.493	12.6648	14.4856	15.6419	19.3016	49.2968	188.006	70.6285	14.6789	49.5046	600.767	10.2986	48.237	162.037	14.71	22.501	247.924	94.841
S1PR1	2.80043	4.56474	0.42461	6.11163	3.24238	6.11835	8.38532	7.9436	4.40835	1.231	3.59019	9.53959	2.44492	10.7168	10.3663	11.9735	2.40328	4.36456	14.0925	3.31104	12.444	4.67828	4.99535	14.9791	4.81888	2.27122	8.93262	10.1773	8.94012	7.88296	1.47966	3.82903	4.87045	10.018	2.94894	2.80869	8.38848	3.77981	13.2067	2.86187	7.43496	3.83349	12.1733	2.59487	5.47467	2.00645	4.10266	1.28612	16.8041
S1PR2	4.41267	1.92642	6.20942	1.67806	0.881878	4.44808	0.930894	3.36897	2.34746	4.71274	0.810672	0.316438	5.59982	0.499541	0.630494	2.28119	6.34097	4.73595	0.783831	6.68888	0.477898	10.4503	5.9855	1.11693	0.397091	5.54642	0.324221	9.63435	0.995777	0.771628	5.1166	8.2106	6.60279	5.27613	6.8556	2.33369	1.66422	5.13202	4.24237	1.58951	0.416821	3.73283	1.02124	6.53799	7.31269	4.02698	5.89619	4.93174	5.41719
SAA1	802.109	1587.15	52.2565	547.123	173.878	1398.08	17827.1	0.16962	338.49	1028.31	182.053	17.932	61.0702	41.1279	151.625	232.235	368.997	5834.5	38.852	7.508	0	642.528	10.5098	13.7728	1036.87	891.342	13.1919	7.02206	29.4726	147.138	65.0752	428.153	90.8058	18.7157	622.709	155.184	127.741	4332.29	612.559	1133.73	187.601	9.28166	0.335174	2773.97	58.6536	0.807773	2000.06	3573.55	136.044
SBDS	33.7604	39.8827	10.8629	31.3556	30.6682	36.0403	52.1713	62.2014	25.2791	28.8416	22.5552	49.4098	14.4084	36.6879	37.2406	29.1883	23.2088	30.3093	42.1804	28.2261	68.9043	37.0502	43.5481	51.206	33.3386	20.1614	52.7175	34.2697	57.7953	29.7704	31.8619	24.1295	22.8526	28.1324	25.2422	39.2565	31.4885	29.8413	53.2668	46.9931	28.6575	39.7712	34.8589	22.3195	43.5069	35.4947	46.4216	47.0151	41.3545
SCG2	0.0072214	0.0959694	0.0137023	0.0386868	0.0757684	0.221673	0.0121421	0	0.0134751	0.00874443	0	0.0427563	0.0266806	0	0.0132898	0.00790852	0.0400651	0.0137124	0.0312914	0.0061407	0	0.126887	0.0679765	0.00665813	0	0.008275	0.00736426	0.0149673	0.072211	0.0584218	0.0557073	0.295953	0	0.0168503	0.0104411	0	0.0783012	0.142018	0.29053	0	0	0	0	0.0467681	0.103588	0.0389605	0.0669623	0.014454	0.326451
SCGB3A1	0.139255	0.239898	0.0880769	0.177625	0.162344	0.185856	0.156097	0.23007	0.151579	0.281041	0.724026	0.154594	0.08575	0	0.0427126	0.177923	0.0965752	0.24239	0.771029	0.157887	0.21875	0.349549	0.163855	0.149792	0.715446	0.34574	0.14201	0.144312	0.193402	0.525741	0.0596801	0.736396	0.270438	0.108312	0.469799	0.167829	0.0838853	4.79951	0.638881	0.180673	0.215224	0.0363333	0.282877	0.200413	0.230488	0.041739	0.0430426	0.139363	2.36069
SCT	0.160943	0.0396085	0.101794	0.0410576	0.562881	0	0.270611	0.0886335	0.150159	0.194886	0.61984	0.397043	0	0.756623	0.246823	0.176256	0	0.0509343	0	0.45619	0.189613	1.00997	0.126249	0	1.81911	1.22949	0.109418	0.277978	0.0894087	0.260408	1.37949	0.496463	1.09394	0.312951	0.465398	0.145475	0.0969494	4.18821	0.624782	0.20881	0.198994	1.76365	0.0934091	0.289532	0.118393	0.434154	0.198984	0.268445	0.336832
SCTR	0.034387	0.00846277	0.0217493	0.60968	0.0901989	0.833746	0.0481823	0	0.176457	0.0485793	0	0.907707	0.105873	0.404151	0.400795	0.182018	3.8077	0.299273	0.033112	0.141331	0.0202564	1.06456	0.539487	0.0634096	0.0530006	0.00656735	0.268849	0.1663	0.67816	0.398745	6.51381	1.74265	0.283817	0.0869246	0.0248593	0.2901	0.103571	0.566968	0.722066	0.15615	0.361395	0.0538318	0.0399156	0.0556753	0.259282	0.453501	0.159431	0.14339	0.345445
SDC1	232.529	416.288	107.438	173.967	101.66	176.259	122.232	306.343	271.392	290.551	298.845	156.842	265.327	460.985	214.09	144.517	121.891	312.713	210.246	153.966	389.204	77.8781	239.882	181.15	131.905	384.849	235.675	101.163	186.675	179.74	72.7777	305.38	127.251	174.311	471.799	232.742	243.509	184.355	101.177	213.457	373.022	199.365	178.228	210.57	64.8952	91.9467	148.817	133.965	124.645
SDC2	89.3834	48.3	62.6527	41.606	193.161	107.203	120.922	73.0398	58.4314	43.4637	39.6208	156.114	58.0388	278.324	82.6259	63.3341	162.535	95.3387	76.5032	21.3308	105.668	179.891	74.2409	111.51	92.7583	81.3929	74.0549	251.183	204.378	61.6415	35.8635	54.0047	151.65	130.67	143.186	115.62	160.161	88.5293	84.5323	104.907	87.9168	99.8374	86.532	81.7098	200.08	133.39	62.5606	20.8934	138.555
SDC3	1.57258	1.33131	11.9619	1.45656	9.01756	6.5375	3.40563	2.95158	2.29932	2.06237	5.01747	3.97069	6.03083	1.10624	2.07595	8.64451	7.36831	4.35252	3.89269	8.43452	5.09989	7.62626	15.0732	2.28246	1.69153	4.25352	1.13901	8.4018	3.3571	2.73777	10.3236	22.935	3.81614	2.26584	3.17758	6.23576	6.90891	4.80342	6.68035	12.2201	8.23442	4.01459	0.790957	1.77539	6.58837	4.49198	7.18285	12.9824	12.6473
SDC4	111.37	222.067	90.8529	34.5513	48.6718	102.265	108.936	142.485	198.975	112.666	81.8803	138.711	130.361	174.621	223.627	63.3001	153.619	143.143	176.024	60.3006	85.0063	181.368	197.419	115.778	114.081	240.514	94.4311	116.217	121.001	220.261	261.355	123.035	141.44	164.406	144.152	113.762	212.331	81.0635	112.796	61.3326	109.178	230.917	69.7231	118.686	145.177	156.813	80.7018	113.111	363.992
SECTM1	2.28777	2.89836	9.85203	0.5887	7.07355	5.60222	1.24878	3.70303	3.13057	6.44789	5.43977	1.4576	2.56025	3.25895	11.746	2.36746	11.1567	2.09022	5.93836	2.45853	5.39063	26.907	5.18613	2.04818	0.960742	2.9027	1.70412	10.1774	2.49765	1.23388	16.4376	8.31075	4.90651	2.76969	2.23394	3.45848	3.09177	2.97179	3.87541	4.95559	5.31296	2.41876	1.95128	1.33132	4.46342	2.96347	1.95537	3.35134	3.03934
SEMA3A	0.0398106	0.0324865	0.00397573	0.301471	0.0806089	0.0978761	0.0070461	0.0415408	0.0019549	0.0202976	0.021788	0.00930432	0.0193535	0.0068195	0.0308483	0.0275359	0.00581245	0.011936	0.0877658	0	0.0123428	0.0631136	1.27709	0.0212504	0.0516715	0.016807	0.0512818	0.108569	1.66569	0.0169511	0.0107757	0.113571	0.167851	0.039113	0.0151474	0.0321967	0.102236	0.104889	0.0931709	0	0	0	0.00182412	0.0361861	4.7928	0.0659424	0.0194291	0.526325	0.460444
SEMA3B	0.0885072	0.0955054	0.833234	0.393392	2.28587	0.472501	0.509412	0.21934	1.62296	0.408085	0.259585	4.27035	7.74747	12.985	2.66564	1.97958	0.288018	0.455707	2.26667	7.93145	7.33529	0.234982	0.547413	3.00678	1.38515	19.4142	1.16988	0.338663	0.731856	2.09302	1.54934	0.256519	0.292533	0.333611	13.7911	0.809242	3.21738	1.37139	0.591066	1.36472	1.29425	1.22568	7.52746	0.415203	0.548408	1.91004	0.30303	28.0921	1.20545
SEMA3C	0.0375909	0.099451	0.00594393	0.00479485	0.0109559	0.622948	0.03687	0.0621057	0.00292269	0.00379325	0.0361936	0.0162289	0.0289345	0.0271881	0.0144124	0.0102919	0.0130349	0.0565088	0.0180986	0.0186465	0.00738125	0.515039	0.159724	0.0317706	0.0386259	0.0430754	0.0191673	0.188287	0.0939733	0.0608228	0.41081	0.298177	0.00912533	0.014619	0.0452924	0.0198206	0.0849158	0.113878	0.252059	0	0.00580981	0.00490395	0.00272716	0.0541001	1.20981	0.321114	0.0813333	1.42015	1.43185
SEMA3D	0.0170485	0.147449	0.092425	0.603916	0.0170358	0.0617598	0.0204754	0.0684046	0.00681694	0.00589831	0.0140698	0.01442	0.0134975	0.00264225	0.0672318	0.402753	0	0.0948053	0.0246245	0.00207102	0.0172162	0.201743	0.0248363	0.0247008	0.0112615	0.0390717	0.0471899	0.108529	0.36125	0.0669916	0.0187879	0.016099	0.0141894	0.0142074	0.126769	0.0242157	0.114434	0.0464457	0.128927	0.023699	0.0722717	0	0.0021203	0.0210307	0.491796	0.689844	0.0406508	0.112119	0.691179
SEMA3E	0.0058195	0.0171864	0.220845	1.19584	0.569887	0	0	0.00480733	0.00271479	0	0.0100857	0.00430699	0	0	0	0	0.00807179	0.00828777	0	0.0024743	0	0	4.92565	0	0	0	0	0.425173	0.0339456	0.117701	0.00748213	0.015387	0	0.0135791	0	0.0026301	0	0.00520217	0.00308065	0.622903	0	0.00455512	0	0	4.495	0	0	5.11347	0.120577
SEMA3F	2.30282	2.06667	7.06376	4.3188	3.35104	3.18747	2.70902	3.8382	3.1127	2.78357	1.60298	5.0256	3.83316	10.0021	3.60525	3.83191	1.56882	3.4804	7.89227	2.9027	4.7023	2.4153	4.75539	4.82033	2.80936	1.77163	3.69267	5.55291	7.97409	2.13291	3.34782	6.19097	9.89639	3.66926	3.12953	3.08916	3.92627	2.67682	4.34631	4.43408	4.33882	3.22284	10.782	1.6161	2.30756	7.18517	4.29333	2.04401	4.86889
SEMA3G	1.15592	3.76666	0.342008	1.05258	0.445384	2.64096	1.48898	3.97487	0.603213	0.355859	1.68415	1.06719	1.11473	0.408098	1.84604	1.49334	0.929366	0.88541	2.25254	0.259895	1.40339	1.51469	1.45694	2.14958	1.06897	0.66453	3.57233	0.734981	1.77626	3.14464	1.0781	1.15	0.473698	1.06974	1.29738	0.78982	3.8238	2.21605	2.9247	0.831198	0.886598	0.220827	0.463932	1.45493	0.795554	6.19409	0.995555	0.874473	8.8272
SEMA4A	0.194115	0.154174	1.07149	0.155313	0.941198	0.529922	0.18792	0.208945	0.10153	0.170949	0.132528	0.13931	0.320561	0.0733886	0.113666	0.42839	0.930108	0.499837	0.15718	0.267605	0.0623713	0.915447	0.242248	0.18982	0.231191	0.374097	0.047989	0.899141	0.387233	0.233181	1.7092	2.29018	0.274165	0.597062	0.204117	0.151533	1.15869	0.487266	0.725532	0.0457906	0.278192	0.63999	0.0409679	0.139683	0.477065	0.536862	0.310905	0.338491	0.856834
SEMA4B	2.89228	2.97549	0.861484	7.62936	3.67568	4.31275	9.55187	6.15367	7.98826	2.97286	1.95905	2.59481	1.81206	1.74222	5.3898	4.4136	2.11856	3.46178	2.70003	3.08622	1.00046	3.37675	7.44615	1.27391	1.26565	3.52301	3.25816	3.62756	7.06224	3.81364	5.12389	3.26049	4.35146	3.74388	4.22233	6.18619	4.20373	2.15455	2.76246	1.46173	2.31823	7.51119	1.80308	2.97063	7.85798	7.01588	3.34203	15.9423	14.8197
SEMA4C	2.26423	2.77126	1.3978	4.77147	2.67681	3.61354	4.58996	4.63126	4.1447	3.17813	1.68018	3.51671	1.49048	3.1484	2.93152	1.52971	2.06568	3.10952	2.58408	3.59043	2.45718	5.0111	10.3241	2.4875	0.924072	1.67003	2.70253	13.0145	3.17829	2.88957	5.61722	2.59284	5.70396	7.2292	1.2265	2.28299	5.16375	2.84696	4.8687	0.918534	1.99912	3.47468	2.2988	2.06189	4.13119	8.61991	3.12864	6.77239	9.04231
SEMA4D	0.212158	0.127972	0.763022	0.291839	0.744426	0.442313	0.326414	0.103093	0.0879745	0.18806	0.134579	0.362268	0.440595	0.147428	0.315159	0.616548	0.336581	0.256722	0.110157	0.425668	0.147031	1.41664	0.578676	0.145748	0.106862	0.259001	0.0933295	1.0562	0.452954	0.511547	0.994812	1.64987	0.123201	0.530637	0.152372	0.121578	1.08004	0.517308	0.540259	0.0755609	0.203168	0.623008	0.0205223	0.107765	0.948647	0.52119	0.42946	0.653617	1.81264
SEMA4F	0.208111	0.970793	0.0658137	1.93781	0.766447	0.454506	0.238582	2.71418	3.13021	0.126002	0.131155	1.29519	0.26795	0.0136835	0.127665	2.18589	0.865967	0.766395	0.546532	0.324439	1.02532	1.32576	2.08019	0.156991	0.00486002	0.0794916	0.176857	0.895352	1.12985	0.765291	0.778381	0.5711	0.702684	0.772551	0.0273544	0.889249	0.997208	1.79646	0.220334	0.0184096	0.409365	0.350473	0.00549024	0.820248	1.17602	1.73239	0.912252	1.31906	2.02729
SEMA4G	9.93898	12.5925	8.56056	9.07403	11.4975	10.6559	14.229	10.9059	9.80313	11.9356	6.68536	13.8706	9.50826	28.735	4.40594	23.374	8.23818	9.3547	3.39051	10.5303	11.3132	16.3772	17.1997	12.6307	8.00801	15.1412	17.6982	42.9737	17.5859	18.2224	22.2026	4.85754	40.3584	46.4134	5.60977	14.5349	24.5878	14.9225	14.2506	7.01976	6.78682	15.4246	25.5643	10.0986	10.8804	42.2921	8.31846	3.94275	18.7326
SEMA5A	1.44458	0.967087	0.0431174	1.60743	0.0993428	1.7352	0.44758	1.32741	2.4124	0.359678	0.47634	1.53042	1.22936	0.0105655	1.48459	0.104877	0.0652883	0.570185	0.642371	0.542428	0.16828	0.566324	0.552585	0.604595	0.180124	0.996929	0.187042	0.311183	0.332727	0.840401	0.667794	0.847598	0.127663	0.179901	1.80939	2.34888	0.774377	0.466238	1.10841	0.034747	0.361239	1.28826	0.162503	0.462523	0.943864	0.179519	0.629126	0.17056	1.6591
SEMA5B	0.268151	0.379654	0.0778173	0.531163	0.21515	0.821031	0.47209	0.661932	0.509199	0.217744	0.273371	0.471629	0.279735	0.095831	0.136435	0.207294	0.122519	0.233624	0.765513	0.238752	0.241586	1.00173	0.824065	1.0413	0.325779	0.29643	0.514741	0.954631	0.872769	0.275638	4.06414	0.412892	0.390568	0.81341	0.547352	0.67011	0.410477	0.682457	1.0688	0.196464	0.941992	0.449414	0.552035	0.456292	0.497786	2.94733	0.157966	0.508302	1.54101
SEMA6A	0.241943	1.05986	0.476078	0.208481	0.225645	1.19356	0.382698	0.559614	0.117046	0.0499133	0.283681	0.267928	0.943555	0.0213874	0.354555	0.170754	0.251064	0.292663	0.318395	1.14755	0.202697	0.854731	12.3742	0.545284	0.254128	0.679756	0.248556	0.178296	0.645153	0.455263	6.29504	0.319854	0.245371	0.190273	0.76959	1.37046	0.427512	0.360996	2.02645	0.0592925	0.255935	0.0897786	0.074891	0.278559	4.16271	1.48903	0.365603	1.76306	1.66535
SEMA6B	1.2639	1.6363	0.641772	1.84603	2.54483	2.64313	2.61901	2.0955	2.13837	0.824511	1.87166	1.55462	1.62781	0.849757	0.884535	2.82681	0.833323	1.17886	5.3224	1.05962	1.97143	2.17835	2.49258	2.88867	1.6188	1.5197	1.89705	1.70182	1.40922	1.12332	2.12852	2.51813	2.43077	1.20978	1.80811	1.09416	2.10713	2.82192	1.79046	0.753505	2.04695	0.592186	2.39826	0.903087	1.65981	2.29299	1.25452	17.9533	4.12984
SEMA6C	1.50076	1.57719	0.346334	5.92908	4.20848	1.48419	2.13693	1.60273	7.08934	2.09151	1.18332	14.917	2.06681	2.17822	3.13202	4.71969	2.86454	0.863262	2.33367	1.37677	1.98714	1.12844	9.13429	4.39107	4.00629	1.67325	3.43318	1.9686	4.77137	2.10559	1.34719	2.4175	3.63331	7.68595	1.33418	2.88721	3.41458	5.11647	2.46925	17.5372	10.0866	6.83124	3.12215	1.34992	1.51426	9.42808	4.20621	4.8508	1.01867
SEMA6D	0.0848709	0.0931448	0.0174096	0.0789975	0.044123	0.1745	0.123419	0.234962	0.280355	0.033331	0.0609558	0.0780914	0.118648	0.0323509	0.170965	0.130627	0.022271	0.0457338	0.0762021	0.0780213	0.0783706	0.138186	0.941054	0.205144	0.0601025	0.0788542	0.0865498	0.128364	0.210257	0.23382	0.0648812	0.0333572	0.0300688	0.0722565	0.119394	0.199042	0.124358	0.12713	0.135998	0.0446405	0.127626	0.0215453	0.0698931	0.0420903	0.789691	0.0928157	0.233969	0.00918231	0.357168
SEMA7A	0.173156	0.269143	0.302617	0.310376	2.11959	1.61163	8.38962	5.1419	0.374125	0.270371	0.310625	3.03856	0.0673423	5.54669	0.0796661	3.92738	0.739476	6.45915	0.190869	3.34396	0.198634	8.20107	1.09378	0.882275	3.75044	0.2663	2.63943	4.15555	6.8576	0.862628	4.53455	1.3976	0.298665	0.738967	0.164709	1.34685	6.34075	3.20438	2.0793	9.02763	2.82268	4.11599	2.57856	0.870571	1.46316	0.729334	4.7662	1.61433	4.52038
SH2D1A	0.200357	0.106506	1.1253	0.392544	1.84992	0.438543	0.43121	0.119167	0.0448638	0.51434	0.25927	0.0949015	0.162855	0.104336	0.125366	0.544164	0.133392	0.357621	0.0578785	0.4566	0.179397	1.549	0.0943001	0.169951	0.148229	0.560197	0.0899011	1.97666	0.333914	0.479789	0.267903	1.01713	0.186768	0.317907	0.254924	0.123149	1.72348	0.339102	0.975773	0.124775	0.148636	0.22583	0.0139542	0.198961	0.185708	0.324287	0.579653	0.0802047	1.99262
SH2D1B	0.0561602	0.0155489	0.0399605	0.145059	0.245518	0.0374768	0.106232	0.0811867	0.0392979	0.0510034	0.0486653	0.0467594	0.0259365	0.0228479	0.0968937	0.107632	0.0486847	0.0666499	0.0202792	0.0537251	0.0578941	0.123348	0.121148	0.0970867	0.0324598	0.0643539	0.0286356	0.167324	0.0935963	0.0113585	0.0902563	0.222735	0.224946	0.0900922	0.101499	0.0951802	0.177608	0.0878547	0.22297	0.0409856	0.0911374	0.0439585	0.012223	0.0530411	0.0387306	0.195683	0.182266	0.0281018	0.088152
SH3BP2	1.3045	2.58529	2.59259	6.02245	2.66957	3.32636	0.60744	1.13335	5.77203	0.548103	2.33716	1.51893	1.83075	3.62961	0.719179	2.73409	0.577128	1.87781	0.822307	4.24108	1.65116	1.60901	5.88394	3.01854	1.77013	1.2967	2.39541	5.78042	0.829335	1.47158	1.01572	2.40104	6.64193	2.64701	1.2967	4.98335	1.80618	2.84158	4.37255	4.02421	2.25514	1.71867	0.927631	1.19412	3.71025	2.11342	3.08404	4.98147	4.81543
SHC1	22.9542	19.4547	17.6587	29.2408	31.4494	25.2038	38.337	65.3878	39.4318	26.8973	11.1863	82.522	12.1799	26.9732	20.8262	53.1787	21.1564	20.9948	13.3311	41.553	21.3587	27.3902	55.6357	28.5728	12.971	13.3019	24.7779	60.9363	76.0812	13.5289	27.2098	35.0749	35.7781	29.7878	8.53902	18.3815	52.0648	28.4343	28.7885	30.4941	46.4299	28.8761	23.9637	29.6136	51.4403	36.5555	34.5858	106.533	84.9109
SHC2	14.4362	21.9524	16.1505	0.467537	15.1137	9.37362	23.5975	4.27429	6.8779	0.516332	8.9153	14.6835	10.7552	29.3217	12.4537	10.8751	7.55211	9.03098	26.8681	8.04322	20.5679	9.95198	4.99153	11.1252	22.5727	6.5681	19.9356	12.7127	10.1676	7.84791	13.1047	11.4748	9.18458	20.8894	6.58011	10.3434	18.1307	20.9374	7.85689	31.1986	17.8544	16.8163	28.7729	10.5637	6.13015	25.947	27.0615	19.5024	9.34966
SHC3	0.0197754	0.0204405	0.0938074	0.0408632	0.0795369	0.0554254	0.179553	0.00980155	0.0092252	0.00718384	0	0.0336621	0.0328785	0.0321813	0.00181966	0.0108285	0.027429	0.0638359	0.0199943	0.233742	0.0605754	0.0670125	0.01241	0.468585	0.0121919	0.00679819	0.0100833	0.034839	0.0725067	0.0223979	0.0966158	0.0209149	0.025923	0.0576795	0.03717	0.344984	0.150096	0.170884	0.0900285	0.0500311	0.029341	0.0309578	0.0654212	0.0106726	0.266214	0.0337855	0.0916862	0.0059372	0.124162
SHC4	0	0.0215191	0.0122898	0.0322203	0	0.0129667	0.0163357	0	0.012086	0.301956	0.53881	0.00958719	0.0658081	0.0245939	0.0387394	0.0283731	0.0269512	0.0153736	0.0654868	0.0247846	0.00763082	0.0406453	0.0279442	0.00597178	0.0898467	0.0408209	0.0528409	0.0167805	0.0539726	0.0157198	0.0333098	0.0256882	0.0141508	0.011335	0.112377	0.477142	0.0409673	0.0308795	0.0240009	0.00630253	0.0660688	0.0253488	0.00281937	0.0174779	0.0571753	0.0232962	0.0240238	0.019446	0.0447332
SLC10A2	0	0	0	0	0	0	0	0	0	0	0	0.00769081	0	0	0	0	0	0	0	0	0	0	0	0	0	0	0	0	0	0	0	0	0	0	0	0	0	0	0	0	0	0	0	0	0	0	0	0.0207993	0.00652451
SLIT1	0.00647094	0.0111476	0.0532061	0.0346664	0.0339472	0.00575758	0.0217606	0.00712729	0.0261619	0.0026119	0.0124608	0.0239456	0.0199232	0.00702027	0.00198478	0.0212599	0.0269261	0.00204789	0.00311551	0.0183418	0.0177886	0.0243644	0.0490682	0.00795493	0	0.0173018	0.0087986	0.0491768	0.0718963	0.0418804	0.0332787	0.034219	0.0125668	0.0478141	0.00311868	0.0155974	0.003898	0.0604159	0.0159857	0.00419776	0	0.0168834	0.0150226	0.00698464	0.028561	0.0581861	0.0240014	0.0194278	0.03792
SLIT2	0.0404345	0.150759	0.0153445	0.10212	0.0742432	1.01725	0.0611883	0.293936	0.279167	0.0293774	0.0700767	0.0733173	0.141922	0.0109668	0.0632509	0.0376396	0.0140209	0.0825375	0.262813	0.010315	0.0119094	0.512555	0.718417	0.0559208	0.037393	0.0625507	0.0474195	0.0481883	0.148254	0.745831	0.353509	0.237877	0.00883406	0.0117936	0.149079	0.0566501	0.266711	0.325307	0.535117	0.0157382	0.0599933	0.00316495	0.0193608	0.122204	0.287778	0.04363	0.236212	0.0384424	1.86343
SLURP1	0	0	0	0	0	0	0	0	0	0	0	0.0270611	0	0	0	0	0	0	0	0	0	0	0	0	0	0	0	0	0	0	0	0	0	0	0	0	0	0	0	0	0	0	0	0	0	0	0	0	0
SORT1	0.582641	3.00291	4.656	5.15194	2.43352	6.12522	0.81387	0.736765	3.55641	3.38651	2.80405	1.09959	7.38113	2.27071	0.428901	3.45053	1.61006	6.56788	1.18465	6.27884	8.65963	15.4379	12.53	15.1675	3.074	0.462218	6.99974	6.50013	2.26697	3.65487	17.673	4.05871	3.39451	3.29946	2.81236	15.5401	5.77893	5.62501	4.72136	7.47062	5.53595	4.78855	4.39735	3.75643	34.7416	7.89082	9.6334	1.69769	5.53792
SOS1	1.96286	1.54623	0.945189	4.6916	3.32126	2.23496	3.52848	3.78226	3.01994	2.48465	1.40089	4.59188	1.58199	2.97807	2.57855	6.27942	2.56965	1.47115	1.35939	1.45282	7.25227	2.23473	4.83703	4.79605	1.52575	1.1732	3.27058	4.27258	4.10502	1.80748	2.62176	1.77387	2.19207	3.11111	2.3078	3.855	4.04519	1.90118	1.95472	3.80761	1.98139	3.33495	1.68115	2.09581	4.34347	4.13801	2.41372	2.70473	4.13908
SOS2	1.26504	1.48561	0.322195	5.69634	1.75687	1.56373	1.85582	3.52079	2.53747	1.04179	1.42238	2.87159	1.81936	3.09181	3.31245	3.7967	1.57407	1.1527	1.38573	1.49687	2.60403	2.3052	4.41113	1.65953	1.30423	1.3588	2.37233	2.39613	2.68845	2.01938	1.85569	1.12242	2.01568	3.11361	1.74722	2.47366	2.75153	1.57357	1.6929	1.38793	2.08901	1.84304	0.916535	0.806449	3.25082	2.2623	1.53781	1.76449	4.59504
SPP1	772.177	21.0174	127.629	0.990582	394.72	570.698	504.748	0.04193	7.42721	0.911708	0.224809	9.76091	36.3348	73.166	0.241314	90.7936	99.585	131.152	1.13637	1.9423	1.95348	3.17463	287.88	441.853	0.286857	4.17811	5.88366	10.3011	428.424	29.6755	65.2816	36.0794	2.62453	0.355316	0.782816	9.45129	6.19165	137.422	135.612	55.7132	4.36175	14.7002	47.5476	1133.96	675.479	33.3106	15.6105	2038.77	28.013
SST	0	0	0	0	0.277797	0	0	0	1.95644	0	0	0	0	0	0	0	2.02714	0	0	0.0540342	0	0	0	0	0	0	0	0	0	0	0	0	0	3.37318	0.0459374	0	0	0	0	0	2.18024	0	0	0	0	9.99914	0	0	0
SSTR1	0.0182864	0.830313	0	2.88996	4.70068	0.536926	1.61421	2.12993	0.204734	0.581255	1.69024	10.1198	0.295583	13.9913	3.03718	5.92278	1.17307	0.0173616	4.28543	2.90781	12.6517	0.992615	1.54561	12.4553	2.3041	1.30965	4.13988	1.40233	6.76567	0.939409	0.199842	1.13623	4.4413	5.65899	3.03392	2.46694	2.77589	0.427735	0.222644	0.987558	7.69016	1.73907	3.49837	0.493451	0.418689	6.14966	0.0763042	0.00457512	1.05054
SSTR2	0.0750191	0.0941585	3.52542	0.0899481	0.131186	0.320395	0.134547	0.0950226	0.830579	0.0514765	0.0664521	0.127699	1.9679	0.00271292	0.02301	0.0164314	0.117927	0.156695	0.429813	5.60734	0.15909	0.0847386	0.14908	0.154474	0.17344	0.191987	0.0382516	2.09389	0.654305	0.368193	0.237915	0.188436	1.80655	12.7785	0.0397711	0.101714	0.899289	0.707866	0.487141	0.0535322	0.667841	0.802506	1.6284	0.167347	7.04721	7.2066	0.0510131	0.0800821	2.27972
SSTR5	0.0144163	0	0.902691	0	0	0.0192406	0	1.66725	0	0	0.066626	0	0	0	0	0	0.0399915	0.0136872	0	12.737	0	0.325682	12.1455	0.0132918	0	0	0	0	0	0.0699775	3.00267	0	0	0	0	0	0	0.154644	0.488416	0	0	3.8366	0	0	0.0159074	0.596298	0.0534715	0.115419	2.00942
STC1	1.56171	1.45701	0.161634	0.550522	1.5641	1.80641	1.6551	4.26902	1.09501	1.26645	0.574126	14.2411	2.12441	1.63268	2.23829	3.91298	0.735173	2.19714	6.67144	1.96785	8.43576	0.522681	2.69513	5.31017	2.72071	0.824285	3.52304	2.76113	2.63429	1.08732	3.30998	1.47652	1.81973	0.253981	0.807408	0.594592	1.41113	0.925057	2.76074	0.727589	3.2475	0.80012	4.4702	0.582329	17.786	0.761715	0.535372	2.90798	2.3117
STC2	0.563929	0.335923	0.237109	0.362925	1.28311	0.658562	0.290924	1.13285	0.0896837	0.469469	0.0925512	1.4252	0.574153	0.312854	0.365594	0.340375	0.177769	0.711851	0.93023	0.381449	1.27215	0.490613	16.8199	1.21123	0.483977	0.345133	0.349626	0.66742	3.59383	0.482146	1.34298	0.889551	0.317349	0.224295	0.412312	0.553175	0.74117	6.70043	2.62906	2.33214	1.6758	0.145464	0.948419	0.321641	5.92913	1.29651	0.303054	5.93866	1.27546
SYK	1.13815	0.68449	1.60182	0.426873	2.9393	1.74537	0.874472	0.398494	0.172294	0.374211	0.291741	0.421171	0.912028	0.433397	0.325977	1.82014	0.972277	0.726357	0.593338	0.615305	0.577211	2.75758	15.698	0.89996	0.342714	0.99327	0.18832	2.11291	0.552721	1.04883	4.33181	9.95968	0.587346	0.773859	0.899085	0.480318	2.98988	1.25549	1.90725	0.396058	7.31114	0.820072	0.118115	0.577641	6.80334	0.745535	0.873658	3.17571	6.66331
TAC1	0	0	0	0	0.0363726	0	0	0	0.0291092	0	0	0.0153938	0	0	0	0	0.0576996	0.00987392	0	0	0	0.0783154	0.00815802	0	0	0	0	0	0	0	0	0	0	0.0242669	0	0	0	0	0	0	0	0	0	0	0.436072	0	0	0.0104079	0.0261188
TACR1	0.0184957	0.00819332	0.0140379	0.00283102	0.019406	0.019748	0.0310988	0.0916726	0.0276102	0.0358344	0.0170958	0.0109509	0.0478345	0	0.0170191	0.0283577	0.00513079	0.0105362	0.0320578	0.0157277	0.0130743	0.0185706	0.0145086	0.0306954	0.0228059	0.0381495	0.0452677	0	0.00616496	0.00598527	0.0190239	0.0244517	0	0.0129472	0.0106968	0	0.0334245	0.306423	0.0234984	0	0.00686057	0	0	0.0199639	0.00408174	0.0133049	0.00686023	0	0.102192
TAP1	8.28633	11.8209	26.7827	29.0136	95.1245	12.5647	42.8583	7.16398	8.89159	15.6638	3.73147	8.52925	4.96783	9.84594	3.61112	19.0843	10.5356	22.201	4.10105	16.5397	24.8408	12.2409	16.4655	8.83027	2.76985	5.3325	7.75044	26.6418	8.70628	4.92716	15.7159	31.8776	5.57857	3.52277	7.64614	8.27694	23.4154	7.83161	17.7004	16.4101	6.825	4.42471	4.64872	11.9394	32.1013	12.7037	19.6706	23.2857	14.0354
TAP2	3.09121	3.88621	3.85392	4.92436	12.5629	4.37171	10.2557	4.00549	2.20463	5.7338	1.98815	1.7943	1.23746	2.45021	1.20167	6.05053	6.63594	5.37379	1.61552	4.71632	11.0741	3.64828	2.86594	2.91808	1.1698	2.88729	3.64119	6.21586	2.44787	1.44182	4.85141	8.70546	2.79722	1.69569	5.63788	2.20808	6.23599	3.00501	6.63987	7.85175	3.14579	1.27955	1.54353	6.94186	7.12024	4.70264	5.14014	5.90735	3.24504
TAPBP	75.2934	38.5901	89.818	61.636	94.8307	52.8311	68.2165	26.0494	123.62	38.8807	44.9416	35.4241	43.9485	66.404	20.4259	80.0971	80.8893	59.4213	33.2293	52.2725	66.3101	91.101	85.9863	45.076	32.933	48.6663	42.9141	64.1751	27.7076	29.1684	56.6508	71.1995	38.2826	35.0144	71.692	81.6594	88.7228	51.6473	70.0122	74.7391	35.7677	39	53.06	122.015	104.987	38.8871	71.6974	74.6636	32.1661
TAPBPL	21.8338	4.43814	8.53114	14.2635	12.3643	12.9384	9.18565	13.0248	19.4917	6.86136	8.58914	12.8133	11.1161	13.7714	22.9187	9.60497	5.30503	10.4437	15.7014	9.2491	21.9936	4.49886	8.61913	13.0097	3.58832	6.12602	11.4312	8.6294	10.2954	8.69982	5.41636	14.5342	4.29699	6.41682	12.8322	5.73969	6.29977	9.60191	6.37079	10.488	8.92121	3.14322	4.56301	6.874	5.92618	4.50805	5.42556	3.3531	10.6962
TDGF1	0.238926	0.0694038	0.014864	0.923267	3.29453	2.56149	0.256845	2.25196	6.2636	0.0142287	0.0452547	0.173929	0.0578851	6.70968	0.0468535	0.107237	0.222741	0.49459	7.03778	1.10911	3.484	3.5001	0.0122899	0.440578	1.86543	0.080789	1.5378	2.5775	1.29902	0.0506998	0.141004	0.0724938	2.82394	1.01448	0.0169894	0.148696	2.42078	2.26185	1.66704	0.701282	4.17697	5.58593	9.74892	1.19645	8.93777	3.33178	0.479419	0.137194	1.628
TEC	0.531071	0.56476	0.0554688	0.514575	0.408961	0.195079	0.868371	0.354182	0.2682	0.247791	0.219543	1.15749	0.216013	1.80775	0.0896647	1.6541	0.486567	0.323806	0.668546	0.248584	2.61751	0.110069	0.416589	1.3791	0.7885	0.133993	2.00234	0.343341	0.3248	0.3311	0.275624	0.251206	0.319341	0.113687	0.436759	0.664997	0.510681	0.197443	0.108326	1.55504	1.51808	0.884765	0.852572	0.247172	0.381707	0.179623	0.171679	0.394953	0.244726
TEK	0.805014	1.34257	0.0155074	0.347139	0.164354	2.08336	1.05811	2.33594	0.16394	0.0940158	0.391873	0.756076	0.279308	0.0398994	0.883631	0.805533	0.0963542	0.803098	0.696469	0.222389	0.572905	1.01548	0.775727	0.565144	0.377898	0.580638	1.34184	0.364189	0.742325	1.44799	0.409799	0.637469	0.529717	0.676989	0.773985	0.480173	1.93479	1.42462	2.61313	0.135194	0.538091	0.00639708	0.156531	0.471952	0.356213	0.0293954	1.03824	0.114507	4.33086
TG	0.00352767	0.0130226	0.0033468	0.160638	0.0308442	0.0400194	0.00889719	0.0174847	0.0181022	0.115335	0.0305688	0.155343	0.00325838	0	0.201254	1.75974	0	0.09043	0.0535007	0.00449961	0.201571	0.00664119	0.0152197	0.019515	0.429538	0.00404235	1.49294	0.0146231	0.014698	0.0256852	0.185956	0.0349775	0.00513812	0.0144049	0.00510049	0.0286977	0.0605629	0.084092	0.0336137	2.29301	0.634629	0.0358959	0.00307112	0.0152308	0.00973135	0.0174463	0.0588801	0.0105912	0.0930253
TGFA	0.0712129	0.12268	0.105096	0.0756955	0.262897	1.0666	0.252781	3.17666	0.018456	0.0335347	0.0502816	0.122977	0.0511597	0.0515056	0.921028	0.272961	0.25791	0.161516	0.131431	0.0605557	0.17712	2.49759	2.38033	0.182384	0.0121956	0.113337	0.0443799	0.217297	1.08134	1.68995	8.40303	1.34942	0.0979608	0.0646205	0.091523	0.0071521	0.336031	0.5187	1.59168	0.0692948	0.0366874	3.12768	0.0172213	0.106759	1.50609	0.0675915	0.132068	2.49042	5.23129
TGFB1	4.06889	3.52345	60.8554	2.42716	7.22132	17.6026	3.91525	3.51649	1.36349	1.63011	2.53625	1.62013	1.33304	1.72362	1.09922	4.97404	2.58212	11.4454	4.3618	19.9348	3.57209	10.8528	6.40258	4.02547	2.51416	4.69034	9.83238	63.3252	23.7696	13.0003	22.1729	14.3338	7.5074	11.2559	4.03307	1.84714	13.4022	14.0467	14.7277	1.77018	3.57636	1.71821	48.9746	5.03335	14.0179	3.63145	4.44211	38.8937	26.971
TGFB2	0.129604	0.500954	0.0144657	0.131279	0.513269	0.422261	0.198689	0.176338	0.0995813	0.0461582	0.0308296	0.22005	0.154919	0.351516	0.347248	0.776472	0.100456	0.253337	0.165174	0.0324142	0.197601	0.138741	0.203331	0.639648	0.0587524	0.0524164	0.252674	0.794011	1.96303	0.191199	1.96037	0.115906	0.0333125	0.137866	0.457448	0.530612	0.220437	2.358	0.278468	0.296737	0.381763	0.0596738	0.0265484	0.197495	4.91699	1.43274	0.289842	0.679038	0.813733
TGFB3	0.291688	2.18306	0.121307	0.262989	1.24374	3.73833	1.33025	1.14866	1.06621	0.333853	0.475514	0.5323	1.00387	0.251426	0.963303	0.354449	0.321446	0.857364	2.08923	1.89934	3.03165	2.01599	1.6048	1.86413	0.203234	1.29577	0.647888	0.757771	1.54495	1.24131	5.7435	2.71518	0.226974	0.428884	0.693267	0.635661	1.57416	1.94785	3.06704	0.0699858	1.78597	0.475394	0.587884	0.776327	5.48481	0.621575	1.65249	5.54635	10.7325
TGFBR1	2.57917	2.3321	1.42624	12.5372	2.13219	5.08873	2.17074	2.33203	5.66392	3.82836	1.55793	4.04911	2.93612	5.51221	2.71381	5.86909	2.74571	1.95027	2.54017	1.29786	3.5355	3.78434	4.03963	3.51541	1.33983	3.23491	2.21182	5.01268	4.19803	2.67843	4.12384	2.40843	5.05619	4.49189	3.86184	3.96502	2.98115	1.51653	2.91898	1.45725	1.77716	3.11691	2.47516	3.14623	8.18644	2.94346	2.02182	6.46009	5.7065
TGFBR2	10.6064	9.0173	2.73246	5.85877	13.0511	15.827	21.4622	18.9095	7.79665	2.66875	3.99323	17.1484	2.961	10.4879	21.9813	20.7261	9.88861	14.4689	13.8185	6.75103	37.1237	13.5946	18.991	26.8896	3.22964	8.09301	15.1921	40.6138	8.02786	16.4049	16.8513	6.58882	11.9648	18.3692	7.32063	12.5413	22.3809	10.189	22.9978	21.6975	20.6156	5.70456	15.2079	5.11821	21.6705	11.6466	10.0557	11.3999	46.5238
TGFBR3	2.0932	5.19917	0.184036	1.12897	1.7868	1.39683	2.63964	0.640972	1.38053	1.33834	0.940805	1.5692	5.50855	1.22354	14.0098	3.61887	2.03983	1.24208	1.06209	0.354838	6.55585	1.09557	2.53904	2.20444	1.28285	2.55367	2.78327	1.71807	1.9247	1.59123	1.14841	1.15104	0.643924	0.734213	1.93393	3.74327	2.5884	1.38589	1.6215	1.68564	1.81975	0.123587	2.51155	0.830219	2.15539	3.26746	1.4139	1.46727	2.90888
THBS1	2.84298	18.1708	1.57032	0.595635	8.03841	11.984	3.84292	2.25995	0.946175	0.430971	0.728296	3.39572	1.15257	3.34252	2.54893	6.89851	2.2036	3.42387	5.55565	0.521426	3.10947	13.5406	16.3778	7.11842	0.723704	1.17683	2.57563	41.3737	11.4522	54.8044	10.8333	3.6196	18.8743	13.295	0.951683	2.23254	24.1038	7.94873	5.30488	5.42015	0.540791	26.0524	1.31778	1.85138	17.4193	3.88663	4.79928	3.1284	58.1672
THPO	4.95232	12.4377	15.4668	7.21142	18.0554	6.25377	10.3267	6.86065	10.9055	9.83325	4.48985	8.07406	9.98197	9.75547	7.8874	8.27567	16.1699	6.06472	7.2271	9.11118	1.0751	3.26861	6.94915	6.17313	4.17208	6.74404	4.62159	14.9396	11.7395	7.63139	10.3352	6.89953	11.1558	25.5995	7.76814	8.22985	10.0058	6.10428	14.8069	6.30552	10.5349	4.65483	10.533	8.72097	11.1667	14.7145	10.6675	9.9123	4.48059
THRA	0.818242	2.10191	0.23021	2.62364	5.08696	2.19165	1.7411	3.06265	3.20899	0.830233	1.39853	4.4959	1.01639	2.01111	1.34227	3.80069	1.62803	1.7466	1.08405	1.55713	5.89041	2.51425	8.78901	1.9797	1.1046	1.58426	3.51323	2.71346	1.53767	1.81698	3.69293	4.32695	1.89453	2.40305	1.99488	4.92219	1.72344	1.85131	2.82294	3.28365	1.81582	1.30743	2.70446	1.34612	4.29644	2.85169	1.40759	7.42069	3.8761
THRB	2.91966	2.01746	2.21597	15.7449	1.5376	1.79037	1.85752	4.44377	3.16787	1.67626	2.28451	5.45797	4.17325	6.22252	5.97891	6.04185	1.96384	1.77879	1.50122	2.77989	3.49821	2.34293	4.19324	4.68124	2.31779	2.93486	3.25562	4.80838	4.15949	2.50977	0.904391	1.45155	3.23785	3.82194	5.78283	4.68306	3.11688	1.50483	1.89288	2.90903	1.47604	5.12123	2.66742	2.17559	2.64449	3.12404	1.94008	1.7351	3.61249
TIE1	1.85673	3.70539	0.317243	8.79535	1.69781	5.62556	4.13791	5.22896	3.77116	1.0549	4.43285	2.34237	1.78273	0.760553	3.93252	2.33214	0.565515	3.02159	5.91866	1.09498	3.07908	3.32798	3.31102	3.93494	4.68372	2.49736	5.26161	2.14606	3.58327	3.69714	3.07733	3.50553	2.72146	1.65291	2.47675	1.47148	3.98619	2.96818	6.25758	0.742096	4.11814	0.312247	2.44636	2.15293	1.80603	0.72532	2.42071	0.971646	7.67235
TNC	0.146712	1.23815	0.0347975	1.74193	1.03335	1.16941	3.09382	2.85145	0.304183	0.177655	0.739254	0.761577	0.0489352	0.0442131	0.644998	0.997505	0.0678312	0.903466	1.42744	0.996318	0.136838	0.534499	0.933475	0.655677	0.0910791	0.123753	0.326243	2.12434	0.73353	1.14735	0.990296	1.30921	1.08032	0.484976	0.751274	0.419939	3.31415	2.3874	2.01065	0.0396557	1.02793	0.137166	0.0922458	0.481676	3.82908	0.767715	2.27871	0.150904	2.36684
TNF	0.175731	0.138393	0.40013	0.179321	0.286814	0.515982	0.0590952	0.0387111	0.0437217	0.0141862	0.0406077	0.017341	0.108211	0.0889696	0.0431204	0.115471	0.0487486	0.133475	0.033843	0.109584	0.0414072	0.20585	0.119469	0.0972142	0.0361138	0.0536986	0.0238943	0.376365	0.136674	0.0189557	0.1205	0.263297	0.221828	0.218692	0.0677549	0.0847157	0.359916	0.425886	0.186052	0.113998	0.0434557	0.11004	0	0.0126454	0.387814	0.210688	0.0651803	0.0468977	0.411916
TNFRSF10A	2.22898	4.26894	0.441877	1.41054	0.919187	1.64285	1.93545	3.64962	1.06775	1.4986	0.438194	4.49102	0.368745	1.09	2.95104	3.29362	0.378381	1.45295	2.36417	0.650662	1.31695	0.676415	2.39047	6.21443	0.440978	0.983553	1.1535	1.68245	2.00711	1.09811	0.752807	1.25787	1.66689	0.589972	0.673416	1.81629	6.28867	1.57023	1.05667	0.932322	0.65403	1.96865	0.741449	0.38064	1.18938	0.646156	3.14659	4.24166	3.35043
TNFRSF10B	4.83071	15.1347	1.45906	7.56889	1.99704	5.48195	5.50455	12.415	9.593	6.30127	3.07877	13.4443	5.3234	11.0267	9.2614	13.4364	2.07504	6.03569	8.70387	5.9108	8.85308	5.15511	12.6492	17.1102	4.71142	4.19198	6.85563	13.5706	6.31252	4.08979	3.76859	4.65009	14.0554	18.9864	4.07291	13.6808	14.0132	5.37657	4.09074	5.56367	6.15639	14.8028	8.6331	3.30767	14.5839	5.78822	14.5077	9.38316	7.763
TNFRSF10C	0.13464	0.154632	0.0851578	2.51882	0.261605	0.28951	0.389885	0.383099	3.63596	0.0815181	0.44076	0.481625	0.193452	0.040575	0.172071	0.417778	0.280123	0.177543	0.864318	0.248063	0.149813	0.525722	0.621961	0.77931	0.760908	0.0428566	0.183071	1.86039	0.137127	0.459906	0.480851	0.207664	1.13306	0.410162	0.832753	0.601739	0.135175	1.08322	0.182144	0.829752	1.41502	0.339581	0.286526	0.217993	1.15551	0.0470816	0.374545	2.84459	0.244213
TNFRSF10D	0.527226	3.78603	0.78978	11.4423	0.514356	1.7184	0.830495	8.63719	2.55788	5.62482	0.352668	3.41731	1.87615	3.10677	2.77803	2.28525	0.646601	0.96424	5.05807	0.77867	0.483841	1.67864	1.01434	8.04882	0.496121	1.26553	2.66564	3.07118	1.88683	1.90367	1.68393	0.594289	8.51174	2.64821	1.18757	4.02313	7.6122	1.04512	1.98599	3.08895	2.58349	1.72021	1.18855	0.700866	1.83101	3.76267	5.92835	1.26076	2.46701
TNFRSF11A	0.462873	0.114452	0.0579997	0.143704	0.0878151	0.343852	0.165201	0.0937881	0.234263	0.113685	0.0706341	0.176133	0.326704	0.180022	0.498246	0.389751	1.17198	0.072553	0.236521	0.087261	0.0771695	0.20826	1.58768	0.22345	0.0336521	0.157621	0.0868357	0.649381	1.36454	0.215496	0.230186	0.202052	0.0445216	0.0891559	0.167312	0.426282	0.138099	0.0897806	0.212667	0.0552384	0.0202468	0.540042	0.0456191	0.254523	4.07154	0.268967	0.291539	1.18648	0.345454
TNFRSF11B	0.180584	0.620482	0.777551	2.26443	1.63966	1.63148	0.198531	0.20655	1.27011	0.0336415	0.224695	0.0822457	0.0898146	0.00753514	2.45416	0.0380319	0.163771	1.07486	0.070224	0.0708733	0.0736454	2.00493	10.4389	0.10246	0.0214102	0.262643	0.0637463	0.626204	2.31508	1.14627	0.267896	1.06513	3.36873	0.891361	0.542279	4.51389	1.66937	3.42309	1.46334	9.23204	0	0	0.0181399	0.764683	12.975	2.00476	2.31855	4.43466	4.23
TNFRSF12A	24.6925	82.3834	41.591	1.76454	11.4638	19.1579	7.14599	5.14334	3.97515	11.9267	14.0315	3.60936	6.67347	69.9918	5.8856	10.7051	18.274	30.8278	55.2476	16.7146	34.9746	20.136	51.5578	21.0619	3.30801	19.1759	18.2356	30.0045	48.9083	19.0653	54.6695	26.267	21.2015	5.7146	42.6761	24.6819	16.8969	49.75	14.2413	14.5157	2.42379	68.9109	101.453	17.2027	33.5657	37.5277	23.9805	49.7102	78.518
TNFRSF13B	0.016593	0	0.272865	0.0253979	0.290161	0.00738187	0.0371994	0.00913799	0	0.154042	0.0191714	0.00409346	0.102175	0	0	0.0181718	0.0306864	0.0262563	0	0.0799554	0.00651629	0.284612	0.00433869	0.0203982	0	0.0316898	0.028202	0.252201	0.0553075	0.0268477	0.0142224	0.424102	0.032224	0.0193589	0.015994	0	0.259879	0.15492	0.193243	0.010764	0	0.0259757	0	0.0238803	0.0244123	0.0348139	0.0718024	0.00553525	0.395887
TNFRSF13C	0.0248922	0.0110269	0.170035	0.323859	0.443996	0.0597999	0.108821	0.0493507	0.0650283	0.0723411	0.0460166	0.305816	0.0735746	0.0432086	0.219888	0.158112	0.0276209	0.09926	0	0.165103	0.0410573	0.593587	0.0546736	0.00459012	0.0537129	0.085572	0.0406154	0.691337	0.0746735	0.0966626	0.140817	0.717398	0.0942658	0.0871247	0.0287924	0.0134999	0.656768	0.649748	0.695752	0.0290661	0.0553994	0.0623488	0.0476756	0.0376156	0.0549338	0.179063	0.212354	0.164416	2.83195
TNFRSF14	7.4827	7.07236	10.4898	10.279	14.791	7.10869	7.53297	4.66855	19.6921	6.4764	10.67	3.27836	5.59336	5.30919	6.06315	4.9341	7.56287	7.30811	5.56355	6.28235	10.7127	7.08508	5.38921	5.44355	7.0561	10.5534	7.97846	6.86774	7.33505	5.49164	10.3593	16.4288	6.76916	6.99137	10.0976	15.833	5.35761	7.2233	10.2955	4.08605	6.64024	19.9681	4.24117	4.75743	20.0215	8.46868	10.6391	8.22153	8.19492
TNFRSF17	0	0	2.43267	0.013441	3.83897	0.0703192	0	0	0	0.978266	0.0608752	0.0389941	0.162219	0	0	0.384674	0.0487195	0.200093	0	0.164277	0	0.529014	0.0137767	0.0161927	0.0812076	0.221375	0.0895502	1.03742	0.0585395	0.341	0.180642	6.15282	0.0255803	0	0.0507859	0	0.634767	0.408189	0.0929705	0	0.130289	0	0	0.0568705	0	0.457972	0.195424	0	0.507237
TNFRSF18	0.47296	0.698382	4.32393	0.701995	1.57894	0.592974	0.26508	0.213109	0.267436	0.607419	0.447099	0.22275	0.47657	0.108842	0.0395637	1.09871	0.656007	0.802829	0.310516	0.572802	0.135082	0.971339	1.0568	0.383212	0.574341	1.18247	0.175388	2.52494	1.38538	0.371034	1.36358	8.92423	0.918501	0.518356	0.911773	0.0777282	1.32092	9.67715	2.26091	0.474167	0.212648	1.21157	0.0499091	0.788963	1.72378	1.9331	0.558172	11.2164	1.34979
TNFRSF19	0.0652836	0.184292	0.0145733	3.99409	17.9435	0.240889	0.258279	0.317229	0.0967384	0.0139504	0.0798652	7.25595	0.0638471	19.0063	0.0883407	17.8276	0.101203	0.123964	0.199682	0.0195931	13.8489	1.05552	0.180743	6.2422	5.25007	0.035204	5.39258	1.81871	2.99524	0.155338	3.00191	0.0609222	0.352381	1.05288	0.0999428	0.124961	0.340053	0.121294	0.329326	1.85344	6.0895	0.0480938	5.04826	0.103627	0.864432	1.29836	0.0712186	0.0192159	0.544913
TNFRSF1A	54.3259	23.8246	24.3447	31.5625	33.1097	34.81	48.1575	29.2485	52.3967	65.1661	21.8648	40.1411	46.0988	23.5889	36.4416	29.0683	29.7842	31.8473	26.4627	20.0484	35.5397	30.7102	27.905	26.6105	20.0018	45.786	25.023	39.121	35.6487	31.04	25.9822	32.044	25.0427	25.848	30.4237	30.6877	35.8556	24.9484	33.9671	27.2876	18.4944	39.7483	41.0978	22.6437	33.01	14.7593	31.4316	41.5229	62.259
TNFRSF1B	10.7403	18.4693	13.5928	11.0369	12.9374	9.35916	12.6062	7.55437	6.40157	12.3363	5.44564	11.2789	14.5821	4.64387	27.4802	15.9761	7.5064	9.25168	11.9135	8.8803	9.49638	9.84813	9.64794	6.86931	4.50817	25.0687	3.78563	11.8436	4.753	8.10695	4.0488	35.5595	3.75141	3.44897	10.0712	6.14061	15.5181	6.95684	21.009	11.4657	32.7318	8.3252	1.43886	5.71769	31.8832	3.59113	9.21471	18.9927	17.33
TNFRSF21	4.27109	3.60906	4.33191	5.83945	14.1259	6.77921	4.3254	1.17307	0.840807	0.74073	1.88052	4.81429	0.968605	0.308121	0.919705	4.4143	8.65131	3.79062	1.77499	1.10536	1.36416	6.31333	21.7004	8.16795	1.22064	0.625862	0.985854	31.7135	14.3274	5.32884	11.7551	3.94965	5.75158	4.19927	2.66915	4.10251	5.46811	7.5579	7.60403	18.0591	1.82333	6.6777	0.651421	3.51951	31.7786	3.51148	3.05898	15.1571	12.0434
TNFRSF25	1.58363	0.536504	0.389872	1.95222	2.15584	3.23056	0.657256	2.74058	3.51145	0.673596	1.2449	0.678744	0.379572	0.695926	1.90451	1.18548	0.79242	0.975396	0.904813	0.771332	0.714414	2.10078	0.562158	0.420473	0.455727	1.11408	0.57239	1.13218	0.910381	0.737889	1.27577	25.7791	0.927015	0.841947	0.891242	0.937678	1.51244	3.48235	1.6448	0.546168	1.1897	1.45923	0.266137	0.540932	0.940071	1.39695	2.55586	4.22794	2.27808
TNFRSF4	0.935543	0.90973	2.55449	1.63281	3.85055	1.43134	0.863249	1.99804	1.35187	1.46442	0.448187	0.35464	0.948432	0.66839	0.955338	1.92417	1.17102	1.37567	1.76326	2.04705	2.02967	3.47955	1.50354	3.11367	1.51229	2.4317	0.535199	5.32052	2.11059	0.849163	3.16842	7.84319	1.62852	0.638921	1.88052	0.536254	1.50511	2.06015	3.17682	1.19899	1.86206	1.39312	1.46008	1.20685	2.19051	3.35467	0.507808	0.902012	1.51862
TNFRSF6B	0	0	0	0	0	0	0	0	0	0	0	0	0	0	0	0	0	0	0	0	0	0	0	0	0	0	0	0	0	0	0	0	0	0	0	0	0	0	0	0	0	0	0	0	0	0	0	0	0
TNFRSF8	0.0577809	0.058173	0.239207	0.0723615	0.174526	0.147223	0.0971534	0.0260352	0	0.0636065	0.0485525	0.0311007	0.0485183	0.0227949	0.053168	0.120805	0.0364289	0.0498715	0.00758706	0.0938009	0.0247542	0.105482	0.0370843	0.0290585	0.0971537	0.0902878	0.0214269	0.41371	0.0437715	0.059494	0.648339	1.06248	0.0535558	0.0612841	0.0759478	0.0142439	0.199345	0.140868	0.161278	0.0408906	0.0292262	0	0.004573	0.085047	0.0869417	0.108635	0.0584496	0.126165	0.18469
TNFRSF9	0.0434197	0.0526654	0.488437	0.0901957	0.493532	0.0910637	0.0260737	0.0563637	0.0202552	0.168998	0.0824169	0.0918136	0.0572931	0.0201881	0.00856141	0.478907	0.0301121	0.0559465	0.0134388	0.097579	0.036539	0.136236	0.0729854	0.61765	0.157746	0.0995091	0.0474414	1.15062	0.149895	0.0551994	0.111649	0.738024	0.0225863	0.0289471	0.291471	0.02523	0.420354	0.177434	0.0623876	0.380251	0.437152	0.033986	0.00810008	0.0569094	0.164265	0.184058	0.0862756	0.0372456	0.175253
TNFSF10	27.3748	14.7889	6.23267	36.8256	24.1724	29.3748	50.4581	53.4469	42.7681	18.046	19.0804	10.653	55.9802	6.62424	23.0148	10.8228	97.2998	27.547	23.6568	5.86519	23.306	25.9772	23.7355	14.3764	14.4999	24.9875	16.6795	15.3738	30.3586	8.27862	9.27504	51.2208	65.8521	85.1283	90.661	58.538	20.3624	19.8247	25.4331	7.28376	4.93864	10.5145	17.276	29.0475	29.9629	5.15993	11.8794	46.3954	26.3174
TNFSF11	0	0.572867	0.32717	0.0109968	0.0753803	0.124652	0.0483198	0.0118697	0	0.0260989	0.481448	0.0265858	0.013272	0.483247	0.0396651	0.007868	0.0797196	0.197811	5.1989	0.0122185	1.48971	0.486914	0.00563569	0.927363	0	0.197583	0.0586123	0.335039	0.658543	3.25486	0.129318	0.0664858	1.88356	0.435864	0.103876	0.298721	0.610217	0.102757	0.0684573	0	0.333113	1.20343	1.93893	0.108566	0.19026	0.0323008	0.0133238	0.179749	0.0902163
TNFSF12	3.13491	5.11513	5.75008	2.37522	7.58346	10.8644	4.49798	1.70918	7.48765	6.82029	6.24201	4.93416	5.30861	1.00898	2.59617	2.1858	3.08722	8.99854	6.39959	7.25088	1.73589	13.8758	7.24623	1.9751	3.22122	4.56221	2.34441	5.00308	8.35941	3.43229	9.80768	14.5331	1.90253	12.1794	3.82251	4.9494	3.56912	8.19534	7.19124	2.13533	7.75219	2.71554	5.35832	3.22587	4.76211	2.66854	12.3641	25.3915	11.0224
TNFSF13	0.836816	0.757957	0.294647	0.838505	0.799558	2.87848	0.768791	0.826675	0.933677	0.2925	0.159481	0.702327	0.175305	0.935934	0.619183	0.6519	0.107692	1.69547	0.560729	0.983014	0.548846	0.389788	1.80687	0.572692	0.0398902	0.355883	0.439882	0.849324	0.747639	1.27023	0.443668	2.33804	0.389527	0.523381	0.648613	1.02932	1.57462	1.66061	0.876831	0.503676	0.479999	0.148558	0.563286	0.465591	1.94193	0.426652	1.00795	7.49399	1.6358
TNFSF13B	0.693226	0.573424	1.98523	0.329132	1.44796	2.67282	0.464081	0.307537	0.395253	0.520758	0.400475	0.593813	2.78653	0.104455	0.277597	1.2161	0.471858	1.05429	0.695336	0.998846	0.559604	2.66653	1.08254	0.485284	0.61338	0.985604	0.0850946	1.31707	0.641849	0.477741	0.742734	2.29964	0.467453	0.344481	0.918778	0.562782	1.62396	0.830077	2.03873	0.237343	0.214281	0.502418	0.0502925	0.637405	1.90524	0.450192	0.833274	6.43014	3.482
TNFSF14	3.00401	1.05585	0.311901	3.50988	0.244331	10.7718	7.09625	12.4654	5.00352	5.91666	0.465308	0.681273	3.61356	2.75078	0.691993	16.0082	2.05197	0.702293	0.237425	21.4351	0.18882	8.43275	8.65858	2.88715	1.33012	0.955932	0.821388	1.12855	1.30812	2.8791	1.29975	6.43244	13.9223	1.05478	1.08138	4.22711	2.20565	2.38044	2.89329	0.0479852	0.396322	19.1067	1.27005	7.26566	0.929574	3.3811	19.8456	4.71308	4.90749
TNFSF15	0.0124445	0.0606403	0.0283356	0.0438107	0.060933	0.172733	0.0544034	0.115137	0.0928858	0.0391798	0.0201297	0.0147363	0.0781631	0.0243018	0.0160314	0.0463374	0.1588	0.122878	0.0323544	0.18413	0.0234583	0.556027	0.0741905	0.0252425	0.0115084	0.0228163	0.0304577	2.73147	0.0705161	0.040271	0.838396	0.157939	1.04767	1.51578	0.0611761	0.418445	0.188909	0.235838	0.163375	0.0290624	0.0461604	0.050652	0.0130008	0.0537298	0.606941	0.624403	0.0877003	0.0821974	0.603198
TNFSF18	0.234681	0.0721948	0.0371081	0.0673524	0.0512984	0.378468	0.032883	0.226174	0.045616	0.0118407	0.0225958	0.217108	0.0903194	0.0318255	0.0359909	0.235593	0.0542514	0.0371354	0.0847424	0.00831502	0.103683	0.14727	0.115057	0.171298	0.0150714	0	0.0199436	0.0608008	0.130373	0.0316432	0.125721	0.4266	0.156667	0	0.0141381	0.0176772	0.0530132	0.0233096	0.134585	0.01903	0	0.0918465	0.0255386	0.0633279	0.248165	0.0175853	0.036269	0.107645	0.0613947
TNFSF4	0.259011	0.330975	0.444205	0.983507	0.278727	0.518529	0.0921257	19.8491	0.26954	0.48855	0.19567	0.637747	0.156425	0.11348	0.719581	0.676409	0.290167	0.165517	0.0647499	11.364	0.199522	1.19403	1.5629	0.289324	0.245669	0.154108	0.248896	1.22852	1.22859	0.177305	0.92218	0.915311	1.24784	0.842633	0.403298	0.77439	0.495077	0.727256	0.421882	0.484681	0.184759	1.05267	0.0433634	0.354842	2.26992	2.63356	1.21935	0.26918	0.600454
TNFSF8	0.466213	0.224485	0.0897439	0.0930789	0.189047	0.351693	0.238577	0.156283	0.0315199	0.0409086	0.00780666	0.110014	0.0624092	0.117285	0.124346	0.429177	0.0937172	0.15396	0.117111	0.10342	0.119406	0.356165	0.259709	0.124594	0.0520705	0.131623	0.0413422	0.595176	0.101346	0.415434	0.0868709	0.500222	0.177143	0.149777	0.11723	0.0855028	0.940203	0.217438	0.679587	0.118345	0.0375938	0.0317322	0.0117645	0.0729309	0.335501	0.133663	0.175429	0.169048	1.56964
TNFSF9	0.0943423	0.0261202	0.492279	0.0180505	0.783638	0.330522	0.158628	0.0194834	0.0660158	0.11424	0.0545013	0.820413	0.196066	0.0255878	0.0217026	0.0904041	0.0163569	1.29878	0.0510999	0.0300839	1.25042	0.177609	1.27659	0.250078	0.199938	0.0270267	0.0240522	0.256642	0.904075	0.0572429	0.30324	0.841879	0.0515293	0.0275171	0.136405	0.0213188	0.426228	0.864428	0.636756	0.206553	0.765499	0.350763	0.0307998	0.012729	0.286276	0.169664	2.01207	6.47924	0.992168
TOR2A	2.19949	1.91812	3.46641	2.523	4.15395	3.45356	2.53221	5.14729	7.33935	3.19605	3.07345	2.39771	2.61956	3.85163	5.16689	2.52779	2.6057	4.72191	2.848	3.45461	2.39011	5.46906	4.33166	2.46692	2.19358	4.37066	2.59661	2.71915	3.82954	2.40325	4.33831	6.63659	2.99255	3.51409	2.79104	2.52139	1.97338	2.68324	3.18891	2.67909	2.43797	2.13075	3.9288	2.18417	6.13886	4.77921	3.62797	8.59241	4.97152
TRH	0	0	0	0	0.451329	0.0132486	0	0	0	0	0	0.132241	0	0	0	0	0.0137686	0	0	0	0	0	0	0	0	0.011375	0	0	0	0	0	0.0131233	0	0	0	0	0	0	0	0	0.0184105	0	0.017284	0	0	0	0	0	0.0124652
TRHR	0	0	0	0	0	0	0	0	0	0	0	0.0173204	0	0	0	0	0	0	0	0	0	0	0	0.0107887	0	0	0	0.0242527	0.0390031	0	0	0	0	0	0.0169185	0	0	0	0	0	0	0	0	0	0	0.0105218	0	0	0
TRPC4AP	17.3221	17.4716	22.5895	34.0089	28.8437	22.3877	17.6841	30.6097	36.1504	32.5392	17.1728	24.9644	10.0744	37.4664	18.2411	20.5234	18.3869	19.6821	19.8418	16.826	24.3303	28.6002	39.7233	36.9196	10.2348	13.9281	24.7779	39.2201	23.7058	13.9842	50.239	23.5199	23.5634	36.2367	20.9532	35.1493	28.202	22.0208	16.8058	24.3653	24.0891	21.7433	30.3408	21.1543	34.2316	43.0061	27.4855	25.8632	30.2966
TSHB	0	0	0	0	0	0	0	0	0	0	0	0	0	0	0	0	0	0	0	0	0	0	0	0	0	0	0	0	0	0	0	0	0	0	0	0	0	0	0	0	0	0	0	0	0	0	0	0	0
TSHR	0.00355771	0	0.0607554	0.0626241	0.0933205	0.00949652	0.0179459	0.00587785	0.0365127	0.0387724	0.00822111	0.0157983	0.0197168	0.0192987	0.0523789	0.0623396	0.00493463	0	0	0.00302529	0	0.00446516	0.00837236	0.0032802	0.0329009	0.0163071	0.0108843	0.036869	0.0118585	0.00575644	0	0.103474	0.0103638	0	0.0154318	0.0289421	0.0321467	0.0169616	0.00376666	0.00692376	0.00659828	0.011139	0	0	0.00392569	0.0255925	0	0.00356046	0.0134025
TSLP	0.00458547	0.761738	0	0.522894	0	0.636475	0.316113	0.0227276	0.58184	0.0444206	0.900665	0.0610865	0.177888	0.0696464	0.434597	0.00502178	0.419771	0.100132	3.51028	0.378227	0.00540234	0.0230203	0.413655	0.0972394	0.0141352	0.483413	0.519056	0.00475199	0.160485	0.690002	0.153284	0.0303105	0.00667884	0.208643	1.13372	2.04337	1.40873	0.17216	0.0825314	0.0178479	0.21261	0.0502489	0.00798406	0.39101	0.0809561	0.00412322	0.348664	0.013767	0.374276
TUBB3	0.00443228	0.0425412	0	0.0271369	0.0232522	0.201127	0.0372624	0.0219683	0.00827061	0.0107341	0.00512103	0.0295228	0.00818787	0.00480854	0.00407843	0	0.00614768	0.0126244	0	0.0113069	0.0104437	0	0.0243378	0.0204328	0.00683146	0.00507895	0	0.0321526	0.0517077	0.014343	0.0341915	0.0468767	0	0.0051711	0.0128168	0.0240378	0.0160196	0.066035	0.0422334	0	0.00822029	0.00693859	0.011576	0.0191365	0.132049	0.00797093	0.0246596	0.927061	0.189234
TXLNA	16.0528	12.1218	20.6689	26.597	16.3234	12.4532	12.0206	4.84405	28.6297	15.6783	10.9141	9.67362	5.20307	8.87473	13.362	15.6123	14.3563	13.0271	4.77954	10.0906	12.8697	8.84703	31.1578	8.96126	5.72887	9.16656	14.9028	12.6442	24.291	9.13311	13.4559	19.7317	8.04779	13.0229	16.6008	31.5797	9.38021	8.37649	8.18411	10.9253	13.4588	13.2939	8.22368	13.3483	31.3588	13.4519	10.7465	14.2553	16.6114
TYMP	47.566	53.9958	23.4286	18.325	36.4887	66.4727	39.6292	24.0611	27.2357	16.0945	53.6163	8.07081	10.7333	30.2004	21.5471	29.8053	41.0912	99.1603	11.8387	17.0555	22.2625	16.4313	16.9936	9.28146	3.3887	67.4925	15.6229	39.7786	10.4551	10.0935	16.071	71.8436	15.5931	7.08649	18.3695	23.943	33.7141	47.1969	38.7583	10.5885	12.8527	13.18	2.38875	47.0388	27.0613	17.2655	32.0648	107.105	23.6843
TYROBP	58.2555	28.498	122.655	7.60466	78.9684	41.461	22.4586	6.79556	4.96866	15.2828	19.1844	9.51696	49.9093	14.3735	8.466	23.0443	42.8781	34.0776	30.9245	21.9798	17.8788	57.0299	44.8145	15.4488	15.482	41.3281	7.77094	54.224	26.5541	20.4209	31.3402	117.254	14.0314	21.1905	32.4896	9.35338	31.2192	22.8481	60.7832	20.4754	20.7575	32.1952	4.27818	23.9276	72.6655	22.4832	28.3845	121.432	34.3337
UBR1	0.876138	0.813323	0.21015	0.977789	1.07213	0.900093	1.18717	3.04859	1.69023	0.663374	0.568982	2.83376	0.387274	1.47405	1.74341	3.20773	0.56235	1.0027	0.762715	0.901426	1.06484	1.04004	2.26195	2.56016	0.475532	0.498584	1.22424	0.985838	2.27101	0.912005	1.17985	1.10337	0.826738	1.04756	0.726318	1.83414	2.08726	0.713069	1.11186	0.658168	0.975688	0.891673	0.852283	0.627614	1.35084	1.26264	1.049	1.20339	2.50833
UBXN1	21.6512	18.0865	51.9708	25.2944	43.2315	23.2974	28.1901	27.9557	23.6083	43.4205	50.7213	19.1289	32.5476	26.6526	17.1255	21.274	59.7281	22.3895	40.2445	27.9001	41.2682	77.1026	23.3043	21.3066	27.3829	35.9089	31.5772	38.3575	33.9902	21.6818	100.361	26.3373	28.531	35.5381	34.2869	21.7994	13.3413	20.6207	31.2316	20.072	27.7002	45.8399	59.0251	44.0448	16.3521	42.6259	20.7382	37.7249	23.9355
UCN	1.18551	4.23049	3.93654	1.28533	2.59138	0.197778	0.913609	0.122415	2.14302	1.2561	0.513649	2.41283	1.18626	2.81345	0.727243	1.16307	0.513853	1.07865	2.60417	3.36031	4.71386	0.712949	3.06109	0.478204	3.92091	4.04712	1.78825	0.486305	2.71668	1.1589	0.254035	2.74273	0.827386	0.633932	3.35672	0.424164	0.758767	0.500437	0.836758	2.54748	0.732899	1.70122	1.89215	1.8128	0.463296	1.44354	0.59545	8.42856	0.341154
UCN2	0.0265159	0.0685193	0.150938	0.0811726	0.162289	0.0176946	0.022292	0	0	0	0	0.068685	0	0.0863006	0	0	0.0367781	0	0.0191495	0.0450954	0.140578	0	0.0207999	0.0366714	1.36911	0	0.0135202	0.0686969	0.0220956	0.0214516	0.0681828	0.0175273	0	0	0.230028	0	0.0239591	0	0	0.258017	0.639307	0	0	0	0.0146292	0.0953713	0	0.623604	0
UCN3	0	0	0.0931413	0.0125226	0.0858393	0	0	0	0	0.0198134	0	0.0121098	0	0	0	0	0	0	0	0	0	0	0	0	0.050439	0	0.0166862	0.0169567	0.709011	0	0	0	0	0	0	0	0	0.0195023	0	0	0	0.025615	0	0	0	0.014713	0	0	0
ULBP1	0	0.0692077	0.0118576	0.0286959	0.0546399	0.0834043	0.0420299	0.0929213	0.00583049	0.0302688	0.0144406	0.582752	0	0.0135594	0.0115006	0.0547505	0	0.0237326	0.00902624	0.031884	0	0.0235295	0.00490208	0.0115235	0.0288956	0.0572877	0	0	0.947755	0.0202227	0.160692	0.297418	0.0091021	0.00729089	0	0.141215	0.0225866	0.111726	0.0198487	0	0.0463602	0.547844	0.00544044	0.0539624	0.468899	0.1461	0.0347684	1.45093	0.211876
ULBP2	0.0873313	0.709254	0.0276179	0.367601	0.27998	0.602205	0.122367	0.120237	0.21728	0.3525	0.0672681	0.107723	0.0268883	0.126327	0.174112	0.175342	1.15074	0.138191	0.147163	0.321802	0.120037	0.219213	0.228352	0.0805194	0.336509	0.133431	0.786687	0.135754	5.0456	0.141304	0.224564	1.1353	0.1696	0.0509444	0.0631341	2.05239	0.0789107	0.0867413	0.477713	0	0.188963	0.0455715	0.114044	0.0785535	2.71426	0.0261759	0.107974	0.815722	0.255883
ULBP3	0	0.0146728	0	0.0304192	0	0.371335	0.0334155	0.0328339	0	0	0	0.0441249	0	0	0	0.522346	0.05513	0.0188684	0.0861147	0.0168994	0.0468276	0	0.0311788	0.05497	0.0306309	0	0.0405332	0.0411903	0.496816	0.128623	0.0511026	0.367825	0.0868384	0.162304	0	0.0179635	0.0359145	0.142122	0.0210407	0	0	0	0	0	0.175432	0.0178701	0.0368564	0.218777	0.324423
UTS2	0.2083	0.129507	0.89449	0	0.536795	0.0146318	0.110601	0.0543381	0.0716001	0.146029	0.126668	0	0.56707	0.118938	0.0605274	0.168088	0.532215	0.0416348	0.015835	0.428834	0	0.577898	0.369794	0	0.405539	0.201003	0.0335401	0.602147	0.292338	0.0886929	0.0281906	0.855119	0.127744	0.166278	0.0158511	0.158552	0.633988	0	0.0696423	0.0426714	0.0203327	0.205949	0.0858988	0.792842	0.604854	0.147869	0.24398	0.438864	0.385467
VAV1	0.88939	0.444499	2.57031	0.446798	3.17436	1.22963	0.843576	0.316487	0.123406	0.419741	0.326723	0.347683	0.572942	0.277097	0.193055	1.66831	0.809751	0.70151	0.68513	0.608911	0.639444	2.66181	1.17351	0.723297	0.267133	0.97734	0.158141	2.09861	0.554895	0.612519	0.60986	3.34047	0.498237	0.601301	0.547343	0.325688	2.0606	0.924153	1.44383	0.443812	0.465244	0.428403	0.123092	0.511997	1.56518	0.598773	0.828938	2.37354	2.33675
VAV2	12.233	9.29964	9.46166	35.2271	5.86161	10.8152	7.26877	22.8084	29.449	10.775	17.7113	11.6699	10.8332	25.2121	52.4026	10.6305	9.64845	16.4733	6.4687	12.7002	22.6931	15.0323	19.9699	9.37989	14.6417	12.0616	20.3159	20.6775	14.0581	10.8192	20.393	9.57548	19.9819	31.0802	10.1676	15.5521	13.0206	4.82513	7.3721	9.15292	12.2668	9.85108	10.8965	7.35551	9.6242	41.0504	13.1634	7.65325	25.3982
VAV3	0.226838	0.111651	1.41422	0.134336	2.23836	0.37483	0.322381	0.365846	0.0730659	0.15042	0.124804	0.249824	0.219499	3.709	0.191334	0.313484	0.0936399	0.21793	0.354944	0.135483	0.229069	0.345703	0.273264	0.303757	1.09882	0.337295	0.25611	0.987876	0.211526	0.371398	3.86777	0.324876	0.220263	0.192186	0.242076	0.190392	0.556336	0.210822	0.700469	0.147152	0.355595	0.114142	0.159866	0.268164	1.99644	3.70304	0.265431	1.78908	0.827409
VDR	1.20772	0.472663	0.164155	1.18649	1.24054	0.92371	0.0290928	3.25314	0.138832	0.213708	0.499783	3.22445	0.37717	0.101366	0.525401	0.35245	0.129595	0.446829	0.0299899	2.32175	0.016308	0.282307	1.61516	1.43258	0.160011	0.448091	0.0211739	0.387308	1.22843	0.503927	0.32924	1.66984	0.982863	1.837	0.110075	0.30341	4.13995	1.22912	0.520255	1.2055	0.154033	0.785513	0.6899	0.276407	0.660592	1.9199	0.69953	1.81471	1.65996
VEGFA	4.00156	4.47026	2.61268	7.05276	9.8408	4.78134	4.82029	10.9227	12.1435	8.6481	3.65657	11.0557	3.23738	26.2646	10.6519	10.8865	3.41584	3.99037	5.00548	10.9047	9.70454	3.82857	22.2972	8.76005	4.4228	3.08395	8.94956	10.5244	9.48533	7.55553	13.7008	8.81574	8.13711	4.91146	8.57522	13.9612	6.4815	4.59672	10.4985	10.1336	9.55378	15.4787	10.6145	2.11041	46.1408	15.1341	8.41781	22.9032	17.8236
VEGFB	3.77449	6.11771	21.317	10.2515	29.0465	26.9859	15.8341	25.49	79.0283	69.9895	47.1197	1.20393	79.0007	1.03407	1.0057	2.43564	35.1841	6.45531	6.86525	65.4678	2.17104	55.4592	44.1135	2.92936	3.52583	28.2666	1.50338	49.2303	22.79	9.72629	66.5349	22.0937	31.8381	26.3775	18.7608	57.8272	6.9589	33.1956	61.1537	1.78077	2.23917	11.5591	13.0113	32.8125	76.7912	71.3995	6.10437	51.5991	29.5554
VEGFC	0.494932	3.0491	0.569625	0.956268	0.950617	2.95626	1.39152	2.26543	0.97653	0.805637	1.23743	1.68737	1.16911	0.22006	0.455419	0.959649	0.438899	1.57917	2.10945	0.70374	2.21769	2.89202	2.45037	1.27173	0.95042	1.74791	1.85341	1.23602	3.2994	1.82479	2.48274	2.61725	0.543613	0.709958	1.75967	0.968069	1.9208	1.87609	4.49266	0.394755	1.4145	0.228629	2.81131	1.78658	1.7279	0.386673	1.26396	1.06371	4.35048
VGF	0.0290458	0	6.31046	0.0389014	0.165076	0.0387657	0.390704	0.059985	0.0270997	0.272581	0.176187	0.059116	0	0.0551453	0.0334087	0	0.120862	0.0344711	0.56637	0.148194	0.0171101	0.236954	0.0113923	0.0334753	1.73477	0.149776	0.222153	0.127928	0.133121	0	0.0746884	0.374393	0.0317294	0.0677751	0.020998	0.196908	0.0131226	0.255319	0.199887	0.0141317	0.0134674	1.51189	0.0948254	0.0391896	0.136213	0.966358	0	0.937452	0.0273552
VIP	0.0371875	0.219647	0	0.445879	0.0650298	0.132352	0.041685	0.511993	0.104087	0.0300203	0.128899	0.0733929	0.0915966	0.094137	0.0456248	0.0271506	0.05158	0.129458	0.107426	0.0632446	0.0438122	0.731207	0.0194474	0.125718	0.840649	0.0284087	0.0758463	0.0513839	0.103294	0.18051	0.191248	0.180264	0.306931	0.0433863	0.14338	0.112045	0.0448024	0.118196	0.301849	0.0482478	0.114949	0.116432	0.0431663	0.0535195	0.0547118	0.300948	0.114943	0.062027	0.311315
VIPR1	0.0531825	0.0412285	0.0151367	0.0915788	0.1395	0.117116	0.152017	0.399787	0.0396953	0.0901586	0.543804	0.179089	0.0392982	0.0144243	0.156598	0.0698914	0.040571	0.24489	2.47347	0.0610519	0.216165	0.186893	0.0938658	0.0220654	0.340176	0.481441	0.325408	0.0578695	0.0842021	1.49728	0.170942	0.460522	0.0658423	0.223371	0.0884282	0.228339	0.201829	0.320109	0.351913	0.745201	0.581944	0.166511	0.259279	0.0631449	0.0381442	0.0286928	0.907393	0.0798354	1.152
VIPR2	0	0.00555217	0.0142691	0	0.0065752	0.0100366	0.00632219	0.0124243	0	0	0.0173774	0.0055656	0.00694605	0	0.166074	0.00411782	0	0.00356989	0	0.0191841	0	0.0188765	0.106182	0	0	0.00430864	0.0958609	0	0.025066	0.0121677	0.0870173	0.0795341	0.0054766	0.00877364	0	0.00679737	0.02718	0.123243	0.0238853	0.00731755	0.00697355	0	0	0.00405855	0.00829792	0.013524	0.0139464	0.169333	0.0991533
XCL1	0.229817	0.0530238	1.06291	3.09995	2.33593	0.210872	0.169057	0.0237307	0.0938082	0.83486	0.215743	0.0212608	0.31841	0.140246	0.0793011	0.440447	1.59381	0.204557	0.0622395	0.195424	0.28768	0.955444	0.259147	0.238377	0.0885541	0.444398	0.776328	2.14346	0.215444	0.185924	0.221607	0.721582	1.9038	1.08926	0.664563	0.0389494	0.622973	0.213998	0.349765	0.25158	1.22541	0.0674571	0.0125047	0.248061	0.142643	4.9725	0.346293	8.13605	0.288587
XCL2	0.729796	0.12829	2.50575	1.17025	2.43085	0.510198	0.292164	2.1818	0.194542	2.10408	0.602287	0.05144	1.34817	0.339322	0.223844	0.532824	1.44606	0.758877	0.200782	0.443272	0.368488	3.05314	0.817823	0.128166	0.0535635	1.19468	0.141759	3.63743	0.405425	0.337378	0.53617	2.15933	0.455556	0.243271	0.251233	0.188474	1.00484	0.600603	0.846246	0.202897	0.322265	0.272017	0	0.562665	0.69024	0.968715	0.386698	0.904255	1.17826
XCR1	0.0363409	0.0375632	0.19997	0.303156	0.0889691	0.189158	0.342182	0.0660445	0	0.0440054	0.0629821	0.0430332	0.0335668	0.019713	0.00334396	0.234813	0.0302434	0.0448539	0.00524902	0.142151	0	0.460664	0.0028507	0.0167531	0	0.149915	0.00741196	0.135578	0.0363394	0.147001	0.00934469	0.249827	0.132328	0.0381588	0.0683067	0.00328483	1.64841	0.0584745	0.477094	0.0212172	0.0134799	0	0.00316377	0.0117678	0.0200499	0.111103	0.0134792	0	0.638878
ZAP70	0.345754	0.173019	2.73356	0.690934	2.07586	1.11262	0.691166	0.145983	0.143372	0.479151	0.519327	0.199027	0.347748	0.291749	0.16261	0.967668	0.325042	0.46687	0.110978	0.774229	0.144835	2.2083	0.343547	0.237318	0.349352	0.77479	0.282075	2.12199	0.550622	0.578085	0.602593	1.72173	0.632296	0.694725	0.4277	0.31947	2.06889	1.15846	1.22834	0.224294	0.377625	0.998337	0.0869576	0.360762	0.31793	0.766884	1.05445	0.157632	2.84141
CTSL1	2.01682	3.9018	5.41037	2.01715	4.2558	4.61758	4.71303	5.42604	3.87165	5.53566	1.95012	5.19213	4.75853	5.67006	5.50834	2.04266	1.99151	5.39731	5.04417	4.35406	6.06981	4.70908	1.99279	1.97642	3.12629	3.35122	2.04801	2.05929	1.95747	1.98017	3.96981	3.2454	2.00071	1.94298	2.00307	5.81406	5.28984	3.56662	2.01142	3.47889	5.00346	2.01783	4.18381	2.02864	4.3618	5.61954	3.45407	5.47141	5.24634
HLA-DRB3	2.01682	2.02492	4.69396	3.99212	1.98719	3.34479	3.74687	1.98439	1.97899	4.20682	1.95012	4.64299	3.92591	2.02724	3.63731	5.0603	1.99151	3.66227	4.30878	5.70471	5.44581	4.05104	1.99279	1.97642	5.72957	2.03716	4.07828	5.94627	1.95747	1.98017	1.98518	1.97242	2.00071	5.36036	2.00307	3.67605	4.93029	1.98927	2.01142	4.35812	3.84531	2.01783	6.25166	2.02864	3.87414	4.14228	3.77505	3.89068	5.64451
HLA-DRB4	5.25108	4.17528	5.2526	2.01715	5.64213	2.71626	2.01917	5.89706	5.33609	5.15686	3.96769	4.11298	4.66439	3.24099	5.7906	4.78074	1.99151	4.03886	4.42024	1.95413	5.37288	2.09602	5.23139	5.54285	1.95521	2.03716	2.04801	5.66077	5.02745	3.62689	5.68318	3.99873	3.52808	4.60869	2.00307	4.12313	2.00604	4.04197	2.01142	5.17473	3.20685	5.84248	1.94618	2.02864	3.80881	5.68377	5.29014	5.57997	5.22924
HLA-H	4.31911	2.02492	4.34281	2.01715	3.6993	3.41934	3.05014	3.42215	3.2949	4.21532	4.74859	4.6014	1.96822	5.59223	5.11372	3.44506	1.99151	3.69288	6.26429	5.29001	5.83573	3.31214	5.2551	1.97642	1.95521	3.35122	3.2819	3.74832	5.57451	3.62689	4.16622	1.97242	2.00071	4.44439	2.00307	6.21237	3.17005	5.69611	3.41556	2.04743	2.00559	5.75716	3.68715	4.52786	6.30311	5.72135	4.29128	6.4359	3.68956
KIR2DL2	2.01682	2.02492	4.08638	3.21991	1.98719	3.71328	2.01917	5.29476	4.81729	4.5234	4.29802	4.25509	3.99197	2.02724	5.78414	3.44506	4.28782	3.69288	1.96123	3.32652	3.30326	2.09602	3.60292	5.39734	5.93783	2.03716	3.75686	2.05929	3.34329	1.98017	1.98518	1.97242	3.52808	4.44439	3.7051	5.93796	3.641	3.56662	2.01142	3.47889	2.00559	5.38423	5.93679	4.81277	1.9814	4.04955	3.93076	4.56844	4.15633
KIR2DS1	3.38218	2.02492	5.79893	2.01715	4.80959	4.79685	3.05014	6.49078	6.06619	5.52821	1.95012	5.21985	5.49366	2.02724	6.53769	4.37895	1.99151	4.46904	2.84657	5.22582	4.57996	5.04679	1.99279	6.08842	4.72515	2.03716	2.04801	4.56569	5.1479	1.98017	4.16622	4.18773	4.27028	5.28664	3.7051	6.05337	2.00604	5.23203	4.16588	2.04743	2.00559	5.41342	1.94618	2.02864	3.80881	4.37909	5.85401	6.53256	1.95439
KIR2DS3	2.01682	2.02492	4.77714	2.01715	3.9772	4.05123	2.01917	1.98439	5.50991	5.10633	4.74859	5.00389	4.18103	2.02724	4.68488	4.1955	3.54811	1.92303	1.96123	5.77242	3.30326	2.09602	4.07692	5.06822	1.95521	3.35122	2.04801	3.27429	4.89116	1.98017	4.16622	4.60558	3.52808	5.59262	2.00307	5.25315	3.641	1.98927	2.01142	2.04743	2.00559	3.77118	3.40614	2.02864	3.06383	4.58015	6.14225	2.0171	1.95439
KIR2DS4	2.01682	2.02492	4.08638	4.66308	1.98719	2.06449	5.09713	1.98439	1.97899	4.70874	1.95012	3.16952	3.29026	2.02724	5.41708	4.02474	3.54811	3.69288	1.96123	2.8821	5.89407	5.79564	4.51082	5.11527	1.95521	2.03716	5.78102	5.73396	4.60929	5.15873	3.41718	1.97242	2.00071	4.5337	2.00307	3.85348	2.00604	4.47948	2.01142	5.43548	3.20685	2.01783	4.33426	5.70784	1.9814	4.97126	1.91405	3.58533	3.74907
KIR2DS5	3.38218	2.02492	4.22977	2.01715	4.16759	2.06449	5.04477	1.98439	4.04793	1.9418	3.21436	4.45853	3.23857	2.02724	3.63269	2.04266	1.99151	3.41185	3.56254	5.53483	1.9796	2.09602	5.90087	3.79306	1.95521	2.03716	3.75686	3.27429	4.89116	1.98017	5.82298	1.97242	4.27028	3.25518	3.7051	1.93257	3.641	4.30437	2.01142	4.22783	2.00559	5.15829	4.15351	4.279	5.77234	2.0212	1.91405	5.93105	1.95439
SHFM1	3.38218	2.02492	1.94194	6.35292	1.98719	3.16862	4.88473	1.98439	1.97899	1.9418	6.71835	6.53074	3.99197	6.5678	1.93625	3.44506	6.51324	6.3178	5.87533	6.3897	1.9796	3.31214	1.99279	1.97642	6.40073	6.46379	4.47958	3.27429	1.95747	1.98017	4.16622	1.97242	4.27028	1.94298	6.55752	1.93257	2.00604	6.76997	6.61142	6.24548	3.68014	3.77118	6.70916	6.33324	3.06383	2.0212	4.07825	3.11929	1.95439
KIAA0368	2.01682	2.02492	1.94194	2.01715	5.55461	2.71626	2.01917	2.96916	1.97899	3.47337	5.24102	5.02609	3.71505	5.75862	2.90194	2.04266	1.99151	4.88742	3.28396	6.04147	3.30326	2.09602	3.60292	4.25369	3.87726	3.35122	3.2819	3.27429	4.09445	1.98017	5.43809	3.2454	2.00071	1.94298	4.17408	2.92142	3.92075	4.96933	4.34925	2.04743	3.20685	6.0537	5.30562	4.81277	3.06383	2.0212	3.73494	3.58533	1.95439
KIR2DL5A	2.01682	2.02492	5.27356	2.01715	5.2977	2.06449	2.01917	3.90087	3.2949	4.77841	4.26476	4.11298	1.96822	2.02724	2.90194	2.04266	1.99151	2.95343	3.28396	6.13699	1.9796	3.78613	5.8156	1.97642	1.95521	3.82893	4.03489	2.05929	3.82205	3.62689	5.36142	4.67073	2.00071	4.00834	2.00307	2.92142	4.25839	1.98927	3.41556	3.47889	3.20685	4.65405	4.15351	3.81607	6.07506	2.0212	4.75686	5.55144	4.15633
CHP	2.01682	6.0454	5.65115	6.6596	1.98719	4.67774	6.32072	4.26932	3.77267	4.21532	4.40903	6.02617	3.99197	6.02001	4.89141	3.44506	3.54811	4.65699	6.52364	1.95413	4.94374	6.55792	6.30036	1.97642	5.48783	5.8947	6.6518	6.31793	1.95747	6.05658	3.89599	5.25578	2.00071	4.67299	3.7051	4.66714	6.24931	6.30804	2.01142	6.24279	6.43348	2.01783	4.25151	5.97825	1.9814	5.99385	5.13419	5.2425	1.95439
IGHA1	2.01682	5.30504	5.10528	3.21991	3.6993	2.72314	3.50872	1.98439	4.23515	3.47337	1.95012	3.16952	1.96822	3.99345	3.35211	3.92386	3.54811	5.11174	2.84657	2.8821	1.9796	2.09602	1.99279	5.8096	5.53398	3.35122	4.22542	2.05929	1.95747	1.98017	5.34875	4.43918	5.44118	1.94298	3.7051	5.72464	2.00604	4.60836	4.7508	2.04743	3.20685	2.01783	1.94618	5.26201	5.74239	2.0212	2.99047	2.0171	1.95439
IGHA2	5.02642	2.02492	5.18415	4.78882	1.98719	2.72314	2.01917	5.00082	4.83198	1.9418	5.34046	5.01628	4.36684	4.23163	4.96046	2.04266	1.99151	4.03886	3.46346	4.35608	3.92843	3.31214	4.77633	4.41567	1.95521	4.62946	2.04801	3.74832	4.78415	1.98017	1.98518	3.2454	2.00071	5.44044	2.00307	4.12313	2.00604	1.98927	2.01142	4.37483	2.00559	2.01783	2.95079	2.02864	3.86377	2.0212	4.64501	4.29264	1.95439
IGHD	2.01682	2.02492	4.73563	4.42003	5.806	2.06449	3.05014	1.98439	3.2949	1.9418	4.29802	5.78552	1.96822	2.02724	4.84874	2.04266	4.02424	4.78815	4.36275	5.8342	4.65469	2.09602	4.51082	3.79306	3.12629	3.35122	2.04801	4.0269	3.34329	1.98017	1.98518	4.43918	2.00071	1.94298	3.7051	3.65556	2.00604	1.98927	4.95819	2.04743	3.20685	2.01783	3.68715	2.02864	1.9814	3.2962	5.49011	3.11929	1.95439
IGHE	2.01682	2.02492	3.14257	2.01715	3.6993	3.419	2.01917	3.70283	4.04793	3.95036	1.95012	1.93392	3.99197	2.02724	5.1554	4.84304	1.99151	2.95343	4.03696	4.33602	4.38194	3.31214	1.99279	4.25369	3.59768	3.82893	2.04801	2.05929	4.27865	4.35719	4.3483	5.18272	2.00071	4.77854	4.17408	4.62977	2.00604	1.98927	3.41556	3.47889	2.00559	5.82636	1.94618	2.02864	3.52796	4.95008	4.97358	3.86598	3.96681
IGHG1	4.56408	3.70497	4.43533	2.01715	3.22414	2.06449	2.01917	3.42215	4.23515	4.88999	4.99137	1.93392	3.71505	3.24099	1.93625	3.44506	1.99151	3.41185	3.76197	1.95413	1.9796	4.25591	1.99279	1.97642	1.95521	4.29157	2.04801	3.27429	3.34329	4.099	1.98518	1.97242	2.00071	3.25518	3.7051	3.37469	3.17005	5.31365	4.59138	2.04743	2.00559	3.77118	2.95079	2.02864	4.57528	2.0212	4.29128	3.11929	3.96681
IGHG2	5.21428	4.43129	3.14257	3.21991	5.37821	3.89129	2.01917	1.98439	3.77267	4.39271	3.21436	3.64453	4.77148	2.02724	1.93625	2.04266	4.02424	5.41077	1.96123	2.8821	1.9796	2.09602	4.99535	4.95106	4.97971	4.62946	4.22542	2.05929	4.74516	1.98017	4.67435	3.2454	4.76433	1.94298	4.17408	2.92142	3.17005	3.56662	4.16588	3.95755	2.00559	2.01783	2.95079	5.26201	4.79579	4.37909	3.73494	3.58533	3.68956
IGHG3	4.72554	2.02492	4.88124	2.01715	5.1575	2.06449	3.50872	2.96916	3.2949	5.50618	6.29534	4.11298	4.72126	2.02724	3.35211	6.26876	4.84654	5.624	4.82738	6.84415	3.30326	3.31214	1.99279	3.79306	6.46638	3.35122	2.04801	2.05929	4.09445	1.98017	5.08582	1.97242	2.00071	5.57147	5.27138	5.38604	4.4662	4.04197	6.5063	2.04743	2.00559	2.01783	6.62948	2.02864	4.88837	4.87292	4.50256	3.11929	6.44264
IGHG4	3.86081	4.43129	3.14257	3.21991	1.98719	2.06449	2.01917	4.05107	3.2949	4.39271	5.06162	5.04702	3.99197	4.32766	4.74694	2.04266	3.54811	3.8899	3.56254	2.8821	3.30326	2.09602	1.99279	4.66348	6.26634	2.03716	2.04801	2.05929	3.82205	1.98017	1.98518	4.43918	2.00071	4.1957	6.09454	3.37469	2.00604	3.56662	2.01142	2.04743	3.95897	2.01783	6.01705	4.52786	3.06383	4.65607	2.99047	2.0171	3.21345
IGHM	2.01682	2.02492	1.94194	3.69324	1.98719	4.42148	5.4211	1.98439	1.97899	4.5234	3.21436	4.70981	1.96822	4.53242	1.93625	2.04266	4.46394	4.52372	4.42024	3.32652	1.9796	4.85624	5.11583	1.97642	3.12629	2.03716	5.35666	3.27429	3.82205	3.62689	3.41718	3.2454	3.52808	4.5337	2.00307	3.85348	4.61248	5.83973	3.41556	2.04743	4.64408	2.01783	3.88466	5.19069	3.06383	2.0212	1.91405	2.0171	1.95439
IGHV2-70	4.13405	2.02492	4.08638	2.01715	5.50083	2.71626	2.01917	4.97448	1.97899	3.47337	5.28809	4.70981	3.23857	3.24099	5.65197	3.92386	3.54811	5.61062	4.29785	5.92772	4.38194	2.09602	1.99279	4.25369	1.95521	2.03716	3.2819	2.05929	3.34329	1.98017	1.98518	1.97242	2.00071	1.94298	4.42869	5.92685	2.00604	1.98927	4.99681	2.04743	2.00559	4.57821	6.29867	2.02864	5.15526	2.0212	3.73494	3.58533	4.69842
IGHV3-23	4.31911	2.02492	1.94194	5.50626	4.513	2.06449	2.01917	4.42428	3.2949	4.88999	6.61817	1.93392	3.23857	2.02724	3.35211	2.04266	3.54811	2.95343	5.45554	1.95413	4.49097	2.09602	4.73798	1.97642	3.59768	5.38187	2.04801	2.05929	1.95747	1.98017	4.48292	1.97242	2.00071	6.25519	3.7051	4.66714	3.17005	5.87274	4.67809	5.54489	3.20685	2.01783	6.37688	5.50126	4.15178	2.0212	2.99047	5.05687	3.68956
IGKC	5.44314	2.02492	4.93801	2.01715	1.98719	2.72314	2.01917	1.98439	5.16419	4.97683	5.61112	3.64453	5.37831	2.02724	2.90194	6.04964	1.99151	3.8899	1.96123	4.07819	5.28022	2.09602	3.60292	3.79306	5.59826	3.82893	3.2819	2.05929	1.95747	4.099	1.98518	5.08982	2.00071	5.60844	5.21573	4.30475	4.25839	1.98927	4.7508	2.04743	2.00559	2.01783	5.757	5.19069	3.52796	3.2962	5.73486	3.11929	3.96681
IGKV1-5	3.38218	3.70497	4.73563	2.01715	3.6993	2.71626	2.01917	2.96916	3.77267	4.5234	1.95012	1.93392	4.5232	2.02724	3.63269	2.04266	3.54811	4.88742	1.96123	3.32652	3.78126	2.09602	1.99279	4.66348	4.07004	2.03716	2.04801	2.05929	4.9977	3.62689	5.18364	4.77776	5.21312	4.72903	4.17408	4.12313	2.00604	1.98927	4.34925	2.04743	2.00559	3.29451	2.95079	2.02864	3.06383	2.0212	5.21686	2.0171	3.68956
IGKV2-40	3.38218	4.43129	1.94194	2.01715	6.63258	2.06449	2.01917	1.98439	4.55623	3.47337	1.95012	5.86193	1.96822	6.4889	2.90194	4.37895	1.99151	6.13609	5.2871	2.39582	1.9796	6.76755	1.99279	1.97642	5.40104	2.03716	6.50344	3.27429	1.95747	4.35719	6.65628	3.2454	4.00503	1.94298	5.84498	2.92142	2.00604	5.90917	2.01142	2.04743	2.00559	3.77118	5.37762	2.02864	3.17031	2.0212	6.47973	6.76776	1.95439
IGKV3-20	2.01682	2.02492	5.20753	3.21991	1.98719	4.90029	4.93744	5.2708	5.37903	4.21532	3.21436	4.67428	3.99197	5.27347	4.20102	5.33226	4.59368	3.69288	5.12166	3.32652	3.30326	2.09602	1.99279	1.97642	3.87726	3.55146	2.04801	2.05929	3.34329	5.12647	4.16622	5.16601	2.00071	4.86266	2.00307	3.65556	3.92075	1.98927	2.01142	2.04743	4.57732	2.01783	4.79001	3.81607	3.06383	4.87292	3.45407	3.58533	3.21345
IGKV3D-11	3.38218	3.70497	3.89465	2.01715	1.98719	3.5883	3.05014	4.91259	3.2949	1.9418	5.03966	1.93392	3.23857	3.99345	5.6897	5.29949	1.99151	4.929	1.96123	2.8821	4.38194	3.31214	1.99279	3.79306	4.07004	3.35122	3.2819	2.05929	1.95747	4.52886	4.16622	3.2454	2.00071	3.73292	2.00307	3.65556	3.17005	1.98927	3.41556	3.47889	3.68014	2.01783	1.94618	2.02864	3.52796	4.37909	3.73494	4.77271	4.96527
IGKV3D-20	6.11192	2.02492	6.30288	4.81254	1.98719	2.71626	4.62035	1.98439	4.86151	5.90666	6.4688	4.53542	6.14535	6.16563	2.90194	2.04266	6.42236	5.68729	4.80477	6.44889	1.9796	3.78613	1.99279	4.95106	6.09499	6.14287	4.94633	2.05929	4.60929	6.02324	3.89599	1.97242	2.00071	4.33497	5.55552	1.93257	2.00604	5.87974	5.56837	6.4354	3.95897	3.29451	6.45474	2.02864	1.9814	3.2962	4.91383	3.11929	1.95439
IGKV4-1	2.01682	2.02492	1.94194	4.16374	4.16759	5.85814	4.1356	4.54256	1.97899	1.9418	3.21436	1.93392	4.43268	3.24099	2.90194	2.04266	1.99151	1.92303	5.01635	2.8821	1.9796	2.09602	5.20592	1.97642	3.12629	2.03716	5.32036	4.21815	1.95747	1.98017	4.16622	1.97242	2.00071	3.25518	2.00307	1.93257	3.92075	5.15444	2.01142	3.47889	5.11525	2.01783	1.94618	2.02864	4.51462	4.87292	1.91405	4.41917	4.64131
IGLC3	4.13405	4.43129	4.08638	2.01715	5.05812	2.06449	2.01917	1.98439	1.97899	4.88999	4.40903	4.6014	3.99197	3.71484	1.93625	2.04266	5.42369	3.8899	1.96123	2.8821	1.9796	2.09602	4.94483	3.79306	3.59768	2.03716	2.04801	3.74832	1.95747	1.98017	3.41718	3.72192	4.00503	3.73292	3.7051	4.12313	4.25839	1.98927	4.99681	4.97111	2.00559	4.48788	4.25151	4.90658	4.3644	3.2962	4.55638	2.0171	3.68956
IGLV7-43	2.01682	2.02492	1.94194	2.01715	1.98719	3.26418	3.78971	4.5923	1.97899	4.21532	3.69058	4.83352	4.18103	4.32766	2.90194	3.44506	5.22174	2.95343	3.76197	3.80525	4.24312	2.09602	5.03998	3.79306	4.90205	3.35122	4.98045	3.74832	1.95747	1.98017	1.98518	5.26865	4.89384	1.94298	2.00307	3.37469	4.25839	4.30437	4.7508	3.47889	4.15068	4.23668	3.88466	2.02864	3.52796	5.61758	3.73494	3.11929	4.49956
CCL3L3	2.01682	2.02492	4.84945	3.21991	3.6993	4.11157	2.01917	5.02777	5.23186	3.95036	1.95012	5.04702	4.5232	3.24099	5.95201	2.04266	1.99151	3.8899	2.84657	3.95701	1.9796	2.09602	3.60292	5.15686	1.95521	5.0581	3.2819	2.05929	3.34329	1.98017	1.98518	1.97242	2.00071	4.60869	2.00307	5.40504	3.641	4.30437	2.01142	2.04743	2.00559	4.23668	4.98774	2.02864	3.52796	2.0212	4.89166	2.0171	3.21345
CCL4L1	3.38218	3.70497	3.61568	3.21991	3.9772	2.06449	2.01917	2.96916	3.2949	3.95036	1.95012	3.64453	3.23857	3.71484	4.35692	4.89738	4.02424	4.25456	3.28396	3.32652	3.78126	2.09602	3.60292	5.22744	1.95521	2.03716	2.04801	3.74832	3.34329	1.98017	1.98518	4.52961	2.00071	4.89892	3.7051	3.37469	2.00604	1.98927	4.34925	2.04743	4.91356	2.01783	3.88466	2.02864	3.52796	3.2962	4.29128	3.11929	3.96681
DEFB4	2.01682	3.70497	4.81489	3.69324	3.22414	3.04933	2.01917	4.05107	3.77267	3.95036	3.69058	3.64453	1.96822	3.24099	4.10193	2.04266	3.54811	2.95343	3.76197	3.32652	3.30326	2.09602	4.07692	1.97642	3.59768	4.29157	2.04801	2.05929	4.09445	1.98017	1.98518	1.97242	2.00071	4.60869	3.7051	4.22158	2.00604	3.56662	2.01142	2.04743	2.00559	4.65405	3.88466	2.02864	3.52796	3.77283	4.78766	3.58533	3.96681
IL8	4.45639	2.02492	5.58949	3.21991	4.513	3.16862	5.0805	3.90087	5.96554	5.6178	1.95012	4.45853	4.5232	2.02724	3.98176	5.77526	1.99151	5.69892	2.84657	3.60636	1.9796	3.31214	4.07692	1.97642	5.85394	5.63878	2.04801	2.05929	5.23718	5.71803	6.13322	1.97242	4.27028	5.77512	3.7051	5.70235	3.17005	5.52694	5.19237	6.00462	3.20685	2.01783	5.09189	4.6923	3.52796	5.71161	6.11069	3.58533	3.21345
CCBP2	2.01682	2.02492	3.14257	2.01715	3.6993	2.72314	3.05014	2.96916	3.77267	1.9418	3.96769	1.93392	4.18103	3.71484	3.63269	2.04266	1.99151	2.95343	3.28396	1.95413	4.57996	2.09602	3.60292	1.97642	4.07004	2.03716	4.47958	2.05929	4.60929	4.90028	4.16622	1.97242	2.00071	4.5337	2.00307	4.76307	3.92075	4.30437	2.01142	2.04743	3.95897	2.01783	2.95079	2.02864	4.44518	2.0212	4.07825	3.58533	3.96681
CCRL1	2.01682	2.02492	4.22977	2.01715	1.98719	3.419	3.98664	2.96916	3.2949	3.95036	5.08234	5.99806	1.96822	4.53242	4.74694	2.04266	1.99151	3.41185	4.22384	4.63328	4.77454	2.09602	4.07692	1.97642	1.95521	2.03716	5.15994	3.27429	1.95747	3.62689	1.98518	1.97242	3.52808	1.94298	2.00307	3.37469	3.17005	4.04197	2.01142	3.47889	3.20685	4.37724	1.94618	2.02864	3.52796	3.77283	4.78766	2.0171	3.21345
CXCR7	2.01682	3.70497	1.94194	5.27005	3.9772	5.34862	5.55463	1.98439	1.97899	1.9418	1.95012	5.1518	3.71505	5.05818	1.93625	2.04266	4.28782	3.41185	5.30517	5.24121	1.9796	4.25591	3.60292	1.97642	1.95521	4.43079	5.47883	2.05929	1.95747	3.62689	1.98518	1.97242	2.00071	3.25518	2.00307	2.92142	3.17005	4.96933	3.41556	2.04743	4.7538	3.29451	3.68715	4.9828	1.9814	4.77792	1.91405	2.0171	1.95439
DARC	2.01682	2.02492	1.94194	3.22642	1.98719	4.70724	3.79654	3.71427	1.97899	3.47337	3.22095	5.06679	3.71505	4.45324	4.42363	3.44506	1.99151	3.89329	4.8948	1.95413	4.38194	2.09602	4.64061	1.97642	3.12629	2.03716	4.37748	2.05929	1.95747	1.98017	1.98518	3.25207	2.00071	3.2686	2.00307	3.65556	3.641	4.31264	2.01142	3.49242	3.21984	4.37724	4.66331	2.02864	3.07022	3.79325	3.461	2.0171	3.22006
GPR44	4.13405	4.17528	4.22977	3.97209	5.05812	2.06449	3.05014	3.42215	1.97899	5.01374	1.95012	3.16952	3.71505	2.02724	2.90194	2.04266	1.99151	4.25456	4.13812	1.95413	3.78126	2.09602	4.07692	1.97642	3.87726	3.35122	2.04801	3.27429	4.84804	3.62689	3.41718	3.72192	3.52808	3.25518	2.00307	2.92142	2.00604	1.98927	4.7508	2.04743	2.00559	4.82601	4.40551	2.02864	1.9814	4.77792	4.37222	4.966	1.95439
GPR77	3.86081	2.02492	3.14257	2.01715	4.58988	2.06449	2.01917	3.42215	4.04793	1.9418	5.06162	5.24359	3.99197	2.02724	4.28476	5.53316	4.84654	4.84088	1.96123	5.01511	3.78126	3.78613	1.99279	3.79306	5.45047	2.03716	2.04801	3.27429	3.82205	4.099	4.16622	5.43256	3.52808	3.73292	2.00307	5.30184	2.00604	1.98927	4.16588	2.04743	2.00559	3.29451	5.73435	4.52786	4.15178	4.04955	4.84304	2.0171	5.39148
IL8RA	2.01682	4.17528	4.43533	3.69324	1.98719	3.04933	3.05014	5.30981	1.97899	3.47337	4.64126	3.16952	4.5232	2.02724	5.68159	3.92386	1.99151	4.78815	4.82738	2.8821	4.24312	2.09602	1.99279	1.97642	3.87726	4.10431	3.75686	2.05929	1.95747	3.62689	3.41718	3.2454	2.00071	3.25518	2.00307	4.841	3.17005	1.98927	2.01142	2.04743	3.95897	3.29451	1.94618	2.02864	1.9814	4.04955	4.07825	5.3362	3.21345
IL8RB	6.1447	2.02492	5.2526	6.68971	4.16759	4.2071	6.62263	1.98439	4.86151	5.98899	5.03966	4.8676	5.17686	3.24099	6.22638	4.51474	1.99151	5.38639	6.48735	6.37992	5.52074	6.47593	4.51082	4.95106	5.2477	4.10431	6.59486	6.39693	1.95747	4.52886	3.41718	1.97242	2.00071	6.0308	2.00307	5.26783	4.37262	6.50808	2.01142	2.04743	6.06249	6.11244	2.95079	6.43564	6.18811	3.2962	5.86179	2.0171	5.20177
ARMET	2.01682	5.28018	3.61568	3.21991	5.23484	3.26418	4.62035	2.96916	4.76788	4.21532	4.15695	5.67551	1.96822	2.02724	5.24149	2.04266	5.94651	5.68386	3.56254	6.27341	3.30326	2.09602	3.60292	4.66348	5.18793	3.35122	3.2819	3.27429	4.09445	3.62689	1.98518	3.72192	2.00071	4.00834	4.42869	4.86395	4.25839	3.56662	2.01142	2.04743	2.00559	2.01783	4.03439	4.279	5.63487	4.91332	2.99047	5.16167	1.95439
ARMETL1	3.86081	3.70497	4.43533	3.21991	3.22414	3.5883	3.05014	5.08876	5.96139	3.95036	5.68094	6.07662	6.0813	5.19925	6.00182	3.92386	1.99151	4.90878	4.22384	4.39996	6.23982	3.78613	4.73798	5.31145	5.89619	2.03716	3.2819	2.05929	5.23718	3.62689	3.41718	3.2454	3.52808	5.83795	5.41422	5.20463	3.17005	4.04197	2.01142	5.78965	2.00559	3.77118	6.13246	2.02864	3.06383	5.9298	5.67956	4.32389	6.12764
C19orf10	2.01682	3.70497	4.08638	3.21991	3.22414	2.06449	3.05014	3.42215	3.2949	4.5234	1.95012	4.11298	1.96822	2.02724	1.93625	2.04266	1.99151	2.95343	1.96123	1.95413	4.24312	2.09602	4.33733	3.79306	4.42181	3.35122	2.04801	2.05929	4.09445	4.65495	4.95172	3.72192	4.27028	4.5337	4.59752	4.00358	3.17005	1.98927	4.86741	2.04743	2.00559	2.01783	1.94618	4.279	1.9814	3.2962	4.44177	2.0171	1.95439
CCL3L3	2.01682	2.02492	3.14257	3.21991	4.16759	2.06449	2.01917	4.35255	1.97899	1.9418	3.21436	3.64453	3.71505	3.24099	2.90194	2.04266	4.02424	2.95343	6.02916	4.07819	3.78126	3.31214	1.99279	1.97642	4.21445	3.82893	4.22542	2.05929	3.34329	1.98017	3.89599	4.18773	4.00503	4.00834	2.00307	3.65556	2.00604	4.30437	2.01142	3.95755	2.00559	2.01783	3.68715	3.81607	1.9814	4.04955	3.73494	3.58533	1.95439
CCL4L1	5.37946	5.82827	1.94194	3.21991	1.98719	2.71626	3.05014	1.98439	3.77267	1.9418	6.14862	3.16952	3.23857	2.02724	3.35211	2.04266	1.99151	3.41185	1.96123	5.14623	3.30326	2.09602	1.99279	1.97642	5.09883	3.35122	2.04801	2.05929	3.34329	3.62689	1.98518	3.2454	2.00071	4.44439	2.00307	3.65556	3.641	1.98927	4.48495	4.22783	4.7538	2.01783	6.09738	3.81607	3.06383	4.04955	1.91405	2.0171	5.63723
CECR1	2.01682	2.02492	3.14257	2.01715	3.22414	2.06449	3.05014	1.98439	1.97899	3.47337	1.95012	1.93392	3.23857	2.02724	3.35211	2.04266	5.22174	3.69288	2.84657	1.95413	3.30326	2.09602	4.51082	3.79306	3.12629	4.10431	4.47958	2.05929	5.02745	1.98017	4.16622	4.93345	4.44786	3.73292	3.7051	1.93257	3.17005	1.98927	2.01142	3.95755	3.20685	2.01783	3.88466	2.02864	3.80881	3.2962	4.44177	2.0171	4.40872
CGB	3.38218	2.02492	3.14257	2.01715	1.98719	2.72314	2.01917	1.98439	4.04793	1.9418	5.06162	3.16952	3.23857	2.02724	2.90194	4.1955	3.54811	2.95343	3.9146	3.32652	1.9796	2.09602	4.07692	3.79306	3.12629	3.35122	4.86801	3.27429	4.09445	1.98017	3.41718	1.97242	4.57878	3.73292	2.00307	3.85348	3.17005	3.56662	4.16588	2.04743	2.00559	3.77118	1.94618	4.279	3.80881	2.0212	4.72354	2.0171	1.95439
DEFB4	2.01682	3.70497	1.94194	2.01715	1.98719	2.71626	3.05014	3.70283	3.2949	4.39271	3.69058	3.92255	1.96822	3.24099	3.83101	2.04266	4.28782	2.95343	1.96123	2.8821	1.9796	2.09602	3.60292	4.25369	3.59768	3.35122	2.04801	2.05929	3.82205	3.62689	1.98518	1.97242	2.00071	4.00834	2.00307	4.22158	3.641	3.56662	3.41556	3.47889	2.00559	2.01783	2.95079	4.279	1.9814	2.0212	3.45407	2.0171	3.68956
FIGF	2.01682	4.72598	4.43533	3.97209	4.58988	2.06449	3.05014	1.98439	1.97899	1.9418	4.29802	3.16952	3.23857	3.71484	3.83101	2.04266	4.28782	4.15722	5.11136	3.32652	4.24312	3.78613	3.60292	3.79306	4.56775	3.35122	3.75686	2.05929	3.34329	1.98017	1.98518	4.52961	4.44786	3.73292	4.81798	4.70158	3.641	4.30437	2.01142	3.47889	4.64408	3.29451	4.40551	4.279	4.3644	4.23849	4.75686	3.58533	1.95439
HDGFRP3	8.57381	6.8103	9.42121	3.29943	4.71757	9.28607	6.98304	5.62905	4.13094	15.161	3.75986	6.42017	6.35537	5.48232	10.9175	5.25229	4.74906	12.2893	3.94867	10.3941	5.85136	5.61889	4.15159	7.9092	6.77361	5.2873	4.1929	8.12273	4.24532	12.6776	5.68493	5.5804	12.5006	5.59742	7.0084	6.08396	6.42865	5.93438	6.68692	12.6525	23.888	8.11096	3.30315	8.26849	7.78785	4.36326	7.65498	4.90019	4.74388
IL1F5	1.93101	0.632432	2.52591	1.30031	0.370223	0.979318	0.912805	3.08634	2.51454	1.28906	1.35446	1.03691	7.01274	1.41396	1.44381	4.02259	0.789291	2.08902	1.44587	0.235248	0.947444	2.92954	1.59613	0.605693	3.15022	0.662484	1.21112	0.72425	2.7427	0.67251	6.16722	7.60773	1.54114	0.475726	1.34362	2.64188	2.3311	6.14943	1.73271	1.31892	0.758574	19.1292	0.997345	2.28396	6.69111	0.439333	0.2765	1.10832	1.87334
IL1F6	2.27996	0.702391	2.7727	1.91498	0.403115	1.03803	1.37392	4.93182	3.07517	1.24791	1.78964	1.26677	6.88331	1.78871	1.32912	5.34267	1.14687	2.6702	1.3566	0.224129	1.01533	3.99744	1.88856	1.07582	4.00745	0.649207	1.78709	0.84281	2.39267	1.03736	6.1712	7.6276	1.61094	0.828785	2.04819	3.0725	3.29332	2.47417	2.27437	1.14592	0.925953	22.0596	1.64867	1.79458	5.3705	0.807904	0.500231	1.06706	1.54569
IL1F7	40.0478	12.7215	21.5642	19.0672	5.75355	36.725	16.8414	22.9408	18.0139	23.9398	22.4088	36.2573	20.8743	46.0829	21.2118	26.5689	20.4378	23.152	30.7303	14.8224	33.1543	35.1879	19.6176	26.9074	26.7643	21.2522	17.4644	16.9932	47.0902	11.1973	17.6435	22.0832	7.80214	62.3154	23.7426	31.5544	14.5539	11.2897	22.685	14.8891	20.0585	47.0158	18.2441	46.804	9.99805	32.6008	20.9922	23.7966	19.2287
IL1F8	0.339381	0.161676	0.510574	0.101414	0	0.0613112	0.082359	0.362512	0.721213	0.383461	0.287898	0.318092	1.90588	0.157731	0.0838856	0.6264	0.0765355	0.386985	0.0786433	0.0300695	0.11048	0.3718	0.14508	0.145162	0.500202	0.164519	0.192173	0.0578588	0.285497	0.143268	0.67268	1.16604	0.0886453	0.101346	0.308638	0.523997	0.0794568	0.217275	0.227572	0.187703	0.0816517	5.07898	0.247236	0.268267	1.26179	0.13311	0.0434984	0.283333	0.283794
IL1F9	3.49115	3.41082	3.79131	2.38587	1.64381	3.56996	3.09381	5.52359	6.21357	3.48595	3.44723	3.09668	4.83294	4.72518	3.95192	3.68818	3.80629	3.86355	2.72215	2.45211	3.34847	4.36642	4.06726	3.81748	5.12972	2.50567	3.27286	3.14523	2.79636	3.40935	8.07696	8.49736	5.29754	2.29978	5.03638	3.02561	3.51332	3.95333	3.83458	3.82552	3.25568	6.86034	3.42469	2.9817	8.85909	3.25494	2.51525	3.6894	4.19806
IL28A	85.4172	48.7605	25.3885	60.7115	91.3532	25.8952	55.9686	47.0955	31.7649	65.8991	34.6298	26.9386	28.6666	59.7809	43.0065	61.195	52.4757	55.907	22.4716	57.5878	36.3858	48.7181	86.7665	34.323	47.3949	40.2298	49.4292	75.5685	29.0871	73.384	84.6611	35.8742	60.4327	48.1735	36.4301	58.8547	140.277	66.558	39.5242	64.2565	62.9264	51.9069	50.2253	48.7411	41.6846	33.834	57.0954	49.0381	39.5638
IL28B	8.48116	10.9043	8.77769	4.95731	8.49382	9.13831	8.4475	10.0401	7.42067	9.3491	9.42649	12.3954	10.8154	11.197	12.1183	8.75151	13.055	10.4795	6.75762	10.5697	11.3178	10.6157	12.9982	6.90445	29.3697	10.9986	9.34097	13.6089	6.39554	9.64707	17.9072	8.2909	20.0712	9.14675	12.8981	15.2532	11.251	7.12322	12.3138	20.9508	8.89208	9.76464	8.68846	8.25868	14.4289	7.74493	11.163	8.94997	9.10081
IL29	122.309	82.1346	145.619	0.0931926	221.318	127.459	0.522207	176.465	121.9	283.709	219.646	223.139	207.998	286.412	201.06	234.299	281.404	157.395	120.137	111.519	327.656	134.594	0.217475	255.436	198.015	334.445	291.768	254.12	187.337	255.104	261.137	178.406	73.9972	126.689	291.674	79.5465	212.378	145.214	166.775	312.326	161.04	113.941	66.6584	227.746	126.306	298.515	335.636	333.682	146.734
IL8	0.230525	0.0366062	0.285607	0.0841939	0.0428582	0.138819	0.0932376	0.54317	0.191694	0.0732564	0.137417	0.0504151	0.331032	0.0982107	0.205126	0.439667	0.0897955	0.257603	0.106837	0.0408495	0.115452	0.266977	0.240205	0.0723081	0.203858	0.0262942	0.23206	0.0471609	0.245257	0.0324383	0.885282	1.08166	0.140496	0.117027	0.189355	0.102823	0.161914	0.18231	0.16562	0.146387	0.0762604	0.781573	0.146944	0.0589538	0.247464	0.0113019	0.0517062	0.0709044	0.17831
KGFLP1	6.07479	6.10248	9.66777	5.19225	0.855719	3.0472	6.7287	26.2808	14.0262	6.06014	8.11799	3.07525	38.6003	14.1537	6.67524	11.2077	6.12218	11.5527	7.4403	3.22642	3.39522	13.5911	10.2158	6.90236	4.42174	1.33621	7.57111	3.46965	6.05078	15.3803	51.9694	26.596	12.7545	4.28072	6.9221	6.84014	12.4071	12.0082	9.11035	6.99744	8.50541	62.7567	8.33214	3.92578	11.601	3.2965	1.79467	2.47321	7.50643
KGFLP2	0.181618	0.0352489	0.0196441	0.0958126	0.00825384	0.00668361	0	0.0348687	0.0102548	0.0156756	0.0203573	0.00693513	0.0683054	0.0257916	0.0658403	0.102427	0.0182034	0.0101246	0.0154314	0.00655582	0	0	0.0177922	0	0	0.0379789	0.013966	0.0227062	0.0384453	0.0562241	0.247488	0.0455325	0.180382	0.0198861	0.162799	0.038081	0.00649627	0.0167191	0.0212639	0.0909412	0.0734329	0.517409	0.0303205	0.0361251	0.0290597	0.0217658	0.00711272	0.00975364	0.0139215
NODAL	0.71301	2.00504	1.2679	2.12711	0.103948	0.22446	0.540217	1.73457	17.026	0.0493542	1.58633	0.327526	1.20074	0.351885	0.495207	2.44375	0.592233	0.175323	0.26452	1.9196	0.0875048	0.306261	4.68064	1.22895	0.178546	0.664308	0.850117	0.222412	2.16726	0.40649	3.84554	5.77014	0.175787	1.3844	0.17769	0.335712	0.449973	0.193012	0.624856	0.305414	0.357311	1.45627	1.33648	0.0974903	1.4517	1.73606	0.418025	0.829144	2.53249
P11	6.763	1.6906	8.71039	0.881785	0.355155	3.97365	2.38386	9.84388	9.20718	5.72509	2.6065	1.77592	5.31969	7.27229	3.79755	3.42913	2.09431	6.5879	2.27271	1.79919	1.58675	4.84549	1.7179	3.48425	5.69973	1.66741	1.83215	1.37816	3.32582	5.03523	7.98328	10.9131	3.89774	1.78441	3.59822	3.78075	3.05777	2.33808	2.16747	2.60318	9.89261	8.93198	2.13201	1.06969	12.4279	1.4905	0.470278	1.56104	2.80035
SCYE1	0	0.0611771	0.0213086	0.079947	0	0.0217498	0.0519403	0.0302586	0.0111237	0.0595135	0.0276028	0.00752276	0.0308721	0.0466284	0.0119032	0.103699	0.0345552	0.0274561	0.0613762	0	0.0180886	0.0075368	0.0128666	0.0205982	0.028391	0	0.0605976	0.00821003	0.0178726	0	0.0820289	0.0432167	0.00698809	0	0.0141274	0.0165231	0.049327	0.0181358	0.0230657	0.014797	0.0217241	0.0191335	0	0.00559801	0.0567395	0.0177075	0.0154308	0.0211602	0.035236
TDGF3	1.61587	0.754532	2.95517	1.11312	0.0687089	0.174861	0.718906	3.6905	1.19513	1.33288	0.127098	1.28658	4.12917	0.746345	0.345816	0.787688	0.5899	0.559872	2.11651	0.639294	0.0793237	1.51208	0.190429	0.632302	0.186754	0.0376375	0.149477	0.88208	0.568229	0.557186	2.25642	0.994965	0.658861	0.260137	1.4404	2.30055	1.39058	0.825127	0.543677	0.200075	1.17495	20.9485	1.97114	0.061372	2.42598	0.25237	0.0338341	0.753945	0.126927
UTS2D	0.103276	0.189416	0.197927	0.275821	0.277209	0.166751	0.11487	0.214141	0.236169	0.105295	0.395575	0.306123	0.1584	0.148496	0.0684443	0.203127	0.183411	0.106869	0.231988	0.106945	0.133348	0.433372	0.0853659	0.17007	0.263713	0.163998	0.187622	0.145257	0.205539	0.0539518	0.244083	0.234846	0.0803642	0.222629	0.124975	0.073084	0.211947	0.208565	0.209147	0.0916292	0.083277	0.169261	0.145476	0.168373	0.239813	0.386393	0.0887284	0.159111	0.24046
CCBP2	0.505706	0.821581	0.753234	0.0269902	0.0515622	0.58742	0.322336	0.507762	0.119289	0.0759774	0.27408	0.782822	0.663359	0.0759309	0.7517	0.314785	0.655837	0.332601	0.161776	0.217483	0.293363	0.215528	0.530194	0.211346	0.0620195	0.533145	0.758141	0.498909	1.0151	0.189747	0.281373	0.566435	0.482939	0.535473	0.304402	0.15258	0.37084	0.104445	0.522186	0.491713	0.411283	0.262179	0.370119	0.300159	0.484517	0.160587	0.387644	0.344578	0.663761
CCRL1	1.24796	1.48001	1.33072	1.79016	0.51379	1.32972	0.774386	1.45553	2.27803	0.96622	1.17404	1.57444	1.52847	1.93079	1.46661	1.25019	1.18313	1.19869	1.26194	0.920206	1.14659	1.5265	0.796273	0.942553	1.6612	0.764868	1.44894	1.07162	1.34741	1.4335	2.15648	1.41717	1.20306	1.21361	1.5658	0.96679	0.681902	0.397931	1.86868	0.971245	1.27926	2.86341	1.39397	1.18421	2.09977	1.20213	1.06783	1.07144	1.44999
CXCR7	2.01682	3.70497	1.94194	3.97209	1.98719	3.42148	3.05014	1.98439	3.77267	3.47337	1.95012	4.65892	4.32188	2.02724	2.90194	2.04266	5.07985	3.69288	3.56254	3.32652	4.05623	3.31214	1.99279	1.97642	3.12629	2.03716	3.2819	3.27429	1.95747	3.62689	3.41718	3.2454	4.00503	1.94298	2.00307	1.93257	2.00604	1.98927	4.16588	2.04743	4.15068	2.01783	3.68715	3.81607	3.52796	2.0212	1.91405	2.0171	4.15633
DARC	4.31911	4.43129	5.32925	2.01715	3.6993	3.04933	4.88473	5.36993	4.23515	4.97683	5.74248	4.53542	5.69341	2.02724	5.23382	5.42627	1.99151	5.17668	4.42024	5.74043	5.10882	2.09602	1.99279	5.01419	5.1607	3.82893	2.04801	3.27429	4.41507	4.90028	4.86183	5.18272	2.00071	5.472	3.7051	6.23644	4.25839	1.98927	3.41556	2.04743	3.95897	2.01783	5.98941	2.02864	1.9814	4.58015	4.84304	4.41917	4.64131
GPER	2.01682	2.02492	4.81489	2.01715	4.30963	4.05123	2.01917	3.70283	5.05565	3.95036	4.29802	5.36567	3.23857	3.24099	3.35211	4.1955	4.77748	2.95343	4.29785	4.33602	6.16458	2.09602	4.94483	4.50054	4.32844	4.10431	2.04801	2.05929	1.95747	1.98017	1.98518	5.33669	4.00503	4.67299	2.00307	5.3957	3.17005	1.98927	3.41556	2.04743	2.00559	6.35428	3.88466	2.02864	3.80881	3.2962	4.64792	3.86598	4.7939
GPR44	2.01682	2.02492	3.14257	3.69324	1.98719	2.06449	3.50872	3.90087	3.77267	3.95036	1.95012	3.16952	3.23857	2.02724	1.93625	3.44506	3.54811	3.41185	2.84657	1.95413	1.9796	3.31214	4.33733	4.7827	3.12629	3.82893	2.04801	2.05929	1.95747	1.98017	4.5884	1.97242	2.00071	3.73292	3.7051	2.92142	2.00604	4.04197	2.01142	2.04743	2.00559	2.01783	1.94618	4.279	5.11217	4.04955	3.45407	2.0171	3.68956
GPR77	2.01682	2.02492	4.68963	2.01715	3.22414	2.06449	3.05014	1.98439	1.97899	4.93584	4.64126	4.95508	3.71505	2.02724	4.68488	4.37895	1.99151	2.95343	2.84657	4.8982	3.78126	2.09602	5.2551	1.97642	4.07004	2.03716	3.2819	2.05929	3.82205	4.099	4.48292	4.43918	4.76433	4.00834	3.7051	3.65556	2.00604	3.56662	3.89434	3.47889	3.20685	3.29451	4.03439	2.02864	5.04525	2.0212	5.55873	3.11929	4.57586
IL28RA	5.26806	5.44014	4.84945	5.55114	4.98231	2.71626	5.56247	1.98439	5.36786	4.77841	5.3654	1.93392	3.23857	5.27386	4.92985	4.78074	1.99151	1.92303	5.18013	5.42461	4.24312	3.78613	4.88677	1.97642	4.21445	4.43079	5.56587	3.27429	1.95747	1.98017	1.98518	3.99873	2.00071	5.46566	2.00307	5.01067	4.97534	5.18229	3.41556	5.08653	5.13144	4.23668	5.00457	4.279	5.20553	3.2962	4.93482	4.41917	4.74882
IL8RA	2.01682	3.70497	3.89465	3.69324	4.11495	3.98638	3.50872	2.96916	4.04793	3.95036	5.35671	3.43574	1.96822	2.02724	3.35211	2.04266	4.02424	3.41185	3.28396	5.02221	1.9796	3.31214	4.6384	4.66348	4.62659	3.35122	2.04801	4.21815	3.34329	4.099	1.98518	4.32846	2.00071	4.67299	4.42869	1.93257	2.00604	1.98927	2.01142	4.40993	3.68014	3.77118	3.40614	3.81607	3.57164	3.77283	4.29128	2.0171	4.40872
IL8RB	4.17839	2.02492	4.28825	3.21991	1.98719	3.68151	2.01917	4.07199	3.40745	1.9418	1.95012	3.70741	4.52482	3.79955	4.39074	4.24937	3.59501	4.22057	2.88038	4.38098	3.87117	2.09602	3.63683	1.97642	4.48188	3.38414	3.32075	4.27541	4.77501	3.76468	4.17693	4.57517	2.00071	3.32603	4.18372	3.8669	3.73496	1.98927	3.41556	2.04743	4.7538	4.08458	4.21342	4.54334	1.9814	2.0212	3.03347	2.0171	1.95439
IL1F5	5.64368	5.61346	5.39764	2.01715	5.5067	5.19512	4.35122	4.63718	5.72788	5.27448	3.96769	5.08552	5.20804	4.87267	1.93625	4.84304	5.28523	5.6283	3.76197	3.60636	5.16977	4.25591	4.73798	5.51898	5.58088	5.64362	4.03489	5.3678	3.82205	5.46005	4.16622	5.06791	5.13421	3.25518	5.34052	5.36045	5.32551	1.98927	4.7508	5.50954	4.15068	2.01783	4.76057	5.68511	4.79579	5.54305	3.93076	3.11929	4.99205
IL1F6	3.38218	2.02492	4.08638	5.08664	4.92189	2.71626	3.05014	2.96916	3.2949	4.39271	4.57591	5.23193	3.71505	3.24099	3.35211	2.04266	4.90565	4.46904	3.28396	1.95413	3.78126	2.09602	1.99279	4.25369	4.21445	2.03716	6.06522	2.05929	4.5221	4.9576	4.48292	4.32846	4.57878	4.1957	4.17408	3.37469	4.85054	4.30437	3.41556	2.04743	3.95897	2.01783	3.40614	4.6923	1.9814	2.0212	4.55638	3.11929	3.96681
IL1F7	3.38218	3.70497	4.22977	2.01715	5.20597	3.71328	2.01917	4.05107	1.97899	4.21532	3.21436	4.25509	3.71505	3.24099	4.99681	2.04266	3.54811	2.95343	1.96123	4.81135	3.30326	2.09602	4.07692	4.7827	3.12629	2.03716	3.2819	3.74832	3.34329	1.98017	3.89599	4.67073	3.52808	4.00834	2.00307	4.22158	3.641	1.98927	4.59138	2.04743	3.20685	4.82601	2.95079	4.81277	3.06383	3.2962	4.55638	4.32389	4.29757
IL1F8	4.93571	2.02492	4.57988	5.99498	5.33034	2.71626	4.25392	1.98439	4.23515	3.47337	3.96769	4.25509	5.27527	3.99345	4.20102	3.44506	4.77748	5.47739	4.36275	1.95413	1.9796	3.31214	5.14847	4.66348	4.84016	2.03716	5.19847	4.76748	5.08058	1.98017	4.16622	4.18773	4.44786	5.12586	4.17408	4.66714	4.11379	1.98927	3.89434	2.04743	4.84131	3.29451	5.45433	5.48571	3.52796	3.2962	4.19524	5.12997	4.69842
IL1F9	2.01682	3.70497	4.73563	4.98745	3.6993	2.06449	2.01917	1.98439	1.97899	4.21532	1.95012	5.08552	1.96822	3.99345	3.63269	3.44506	4.28782	4.40727	2.84657	5.08067	1.9796	2.09602	4.33733	1.97642	1.95521	3.35122	4.03489	3.27429	1.95747	4.52886	3.89599	5.16601	4.27028	4.67299	2.00307	4.54412	2.00604	4.47948	4.34925	3.47889	2.00559	4.23668	2.95079	2.02864	4.44518	2.0212	4.37222	4.56844	3.68956
IL28A	3.38218	4.60125	1.94194	3.21991	1.98719	2.72314	3.05014	1.98439	1.97899	1.9418	1.95012	1.93392	3.23857	3.24099	1.93625	2.04266	4.46394	2.95343	4.13812	2.8821	1.9796	3.31214	3.60292	1.97642	4.72515	2.03716	4.03489	2.05929	1.95747	3.62689	1.98518	3.2454	2.00071	1.94298	4.17408	1.93257	3.17005	1.98927	3.89434	3.47889	3.20685	2.01783	4.25151	4.279	1.9814	2.0212	2.99047	3.11929	1.95439
IL28B	4.31911	4.17528	4.63811	3.69324	1.98719	3.419	3.05014	4.63718	4.86151	3.47337	4.15695	3.64453	3.23857	2.02724	5.42559	4.37895	4.59368	4.46904	2.84657	4.07819	3.78126	2.09602	1.99279	4.66348	3.59768	3.35122	4.77166	3.27429	4.27865	1.98017	1.98518	3.2454	4.27028	4.1957	2.00307	4.62977	3.17005	1.98927	5.12095	4.9236	5.00213	3.77118	3.68715	4.279	3.06383	2.0212	5.67218	5.29779	4.83456
IL29	2.01682	2.02492	4.51313	5.0403	3.6993	2.71626	2.01917	1.98439	4.04793	3.95036	5.41283	4.6014	3.99197	3.99345	4.80102	2.04266	4.28782	4.25456	5.70758	5.12572	3.30326	2.09602	3.60292	3.79306	5.28875	2.03716	2.04801	4.94334	4.09445	4.099	3.41718	4.43918	2.00071	5.08627	4.59752	4.73344	3.641	5.09116	5.61618	2.04743	4.7023	4.04789	5.8711	2.02864	3.06383	2.0212	4.78766	2.0171	4.93649
IL8	3.86081	4.60125	5.15221	3.21991	3.22414	4.26778	4.71343	5.25379	3.2949	4.21532	3.21436	4.89902	4.32188	5.24593	5.30956	3.92386	1.99151	4.929	4.78081	4.39996	5.56064	3.78613	1.99279	1.97642	4.72515	4.10431	2.04801	3.74832	4.41507	3.62689	4.48292	4.60558	2.00071	1.94298	2.00307	5.28188	4.94763	3.56662	2.01142	3.47889	5.11525	2.01783	3.68715	4.279	1.9814	4.65607	3.45407	4.84764	4.29757
[truncated: 17 more rows]
[truncated: 206 more columns]
